# Supplementary material for: Inequity in the use of Insecticide-Treated Nets among Children and Adolescents in Rural Guinea: A cohort study in rural Guinea
Source: Research Square preprint supplement (doi:10.21203/rs.3.rs-7447768/v1), 2025-10-10
Supplement: Supplementary file 1 [file 80ba89c10ad6a7ff968f0886.xlsx]

## Sheet: adolescents
				Inequity in the use of Insecticide-Treated Nets among Children and Adolescents in Rural Guinea: A cohort study in rural Guinea. Almamy Amara TOURE1,2,4, Sidikiba SIDIBE2, Aboubacar Sidiki MAGASSOUBA2, Abdoul Habib BEAVOGUI3, Abdoulaye Fodé TOURE1, Amadou Wann1, Mohamed Prince KABA1, Alexandre DELAMOU2,5, Seni KOUANDA1,7. 1.Institut Africain de Santé Publique (IASP/USTA) of the University Saint Th…
Visit_Number	Subject_ID	Birth_Year	Gender	Visit_Date	Hemoglogin_level	residence	Head_age	Head_gender	Head_education	Head_marital_status	Head_occupation	Head_ethnic	Head_radio	Head_tv	Head_internet	access_itn	use_itn	travel_child	mosquito_repellent_use	hh_num	PARASITEMIE	Gametocytemie	Especes	index_wealth_quint	wealth_quintile	age_part	parasitemia_rec
month1	7007	2012	Female	2022-03-07	14.3	Foulawa	[35,50)	1	secondary	married	commerçant	peulh	access	access	notaccess	yes	yes	no	yes	(5,12]	0			-1.44789	Middle SEP	10	negative
month1	7020	2010	Male	2022-03-07	12	Foulawa	[35,50)	1	secondary	married	fonctionnaire	peulh	notaccess	access	access	yes	no	no	no	(5,12]	0			0.0819717	High SEP	12	negative
month1	7026	2011	Female	2022-03-07	14.4	Foulawa	[50,77]	1	no_formal_education	married	agriculteur	peulh	notaccess	notaccess	notaccess	no	no	no	no	(5,12]	0			7.07725	High SEP	11	negative
month1	7048	2008	Female	2022-03-09	11	Layah	[50,77]	2	secondary	married	agriculteur	soussou	notaccess	access	notaccess	yes	yes	yes	yes	(12,35]	0			-1.22226	Middle SEP	14	negative
month1	7049	2011	Male	2022-03-09	12.2	Layah	[50,77]	2	secondary	married	agriculteur	soussou	notaccess	access	notaccess	yes	yes	yes	yes	(12,35]	0			-1.22214	Middle SEP	11	negative
month1	7052	2010	Female	2022-03-09	13.3	Layah	[50,77]	2	no_formal_education	married	unemployed	soussou	notaccess	access	access	no	no	no	yes	(5,12]	0			-2.885	Low SEP	12	negative
month1	7056	2012	Male	2022-03-09	12.5	Carrefour_Fodéyah	[35,50)	1	primary	married	unemployed	soussou	access	access	access	no	no	no	no	(5,12]	0			7.081	High SEP	10	negative
month1	7057	2012	Female	2022-03-09	10.7	Carrefour_Fodéyah	[35,50)	1	primary	married	unemployed	soussou	access	access	access	no	no	no	no	(5,12]	128	0	Pf	7.08112	High SEP	10	positive
month1	7061	2010	Male	2022-03-09	10.25	Carrefour_Fodéyah	[35,50)	1	primary	married	unemployed	soussou	access	access	access	no	no	no	no	(5,12]	0			7.08162	High SEP	12	negative
month1	7064	2008	Male	2022-03-09	13.3	Layah	[35,50)	2	secondary	married	unemployed	soussou	access	access	access	no	no	no	yes	[3,5]	0			-2.08031	Middle SEP	14	negative
month1	7065	2011	Female	2022-03-09	12.5	Layah	[35,50)	2	secondary	married	unemployed	soussou	access	access	access	no	no	no	yes	[3,5]	0			-2.08019	Middle SEP	11	negative
month1	7070	2011	Male	2022-03-09	12	Layah	[35,50)	2	no_formal_education	married	unemployed	soussou	notaccess	notaccess	notaccess	no	no	no	yes	(5,12]	0			-2.01029	Middle SEP	11	negative
month1	7071	2010	Male	2022-03-09	12.6	Layah	[35,50)	2	no_formal_education	married	unemployed	soussou	notaccess	notaccess	notaccess	no	no	no	yes	(5,12]	0			-2.01016	Middle SEP	12	negative
month1	7081	2010	Male	2022-03-09	12.8	Layah	[35,50)	2	no_formal_education	married	unemployed	soussou	access	access	notaccess	yes	yes	no	no	(5,12]	0			0.643027	High SEP	12	negative
month1	7087	2008	Female	2022-03-10	10.6	Loumafori	[35,50)	2	secondary	married	unemployed	autres	notaccess	access	notaccess	yes	yes	no	no	[3,5]	0			-0.130631	High SEP	14	negative
month1	7098	2010	Male	2022-03-10	11.8	Olympio	[22,35)	2	primary	married	unemployed	autres	access	access	access	yes	yes	no	yes	(5,12]	0			-0.391305	Middle SEP	12	negative
month1	7108	2010	Male	2022-03-10	14.5	Olympio	[35,50)	2	secondary	married	commerçant	peulh	notaccess	access	notaccess	yes	yes	no	no	(5,12]	0			-1.12838	Middle SEP	12	negative
month1	7112	2009	Female	2022-03-10	13.3	Olympio	[22,35)	2	primary	married	unemployed	peulh	notaccess	access	access	yes	yes	no	yes	[3,5]	0			-2.22735	Low SEP	13	negative
month1	7113	2010	Female	2022-03-10	11.3	Olympio	[22,35)	2	primary	married	unemployed	peulh	notaccess	access	access	yes	yes	no	yes	[3,5]	0			-2.22723	Low SEP	12	negative
month1	7116	2010	Male	2022-03-11	13	Olympio	[35,50)	2	no_formal_education	married	commerçant	peulh	notaccess	notaccess	notaccess	yes	no	no	yes	(5,12]	0			-2.94599	Low SEP	12	negative
month1	7117	2012	Female	2022-03-11	13.6	Olympio	[35,50)	2	no_formal_education	married	commerçant	peulh	notaccess	notaccess	notaccess	yes	no	no	yes	(5,12]	0			-2.94586	Low SEP	10	negative
month1	7131	2012	Female	2022-03-14	12.6	Loumafori	[50,77]	1	secondary	married	unemployed	soussou	notaccess	notaccess	notaccess	yes	yes	no	yes	(5,12]	0			0.331091	High SEP	10	negative
month1	7133	2010	Male	2022-03-14	14.41	Hafia	[22,35)	2	secondary	married	unemployed	autres	notaccess	access	access	yes	yes	no	yes	(5,12]	0			-2.60487	Low SEP	12	negative
month1	7136	2009	Female	2022-03-14	13.02	Hafia	[22,35)	2	secondary	married	unemployed	autres	notaccess	access	access	yes	yes	no	yes	(5,12]	0			-2.6045	Low SEP	13	negative
month1	7141	2009	Male	2022-03-14	11.9	Loumafori	[50,77]	1	no_formal_education	married	agriculteur	soussou	access	access	notaccess	yes	yes	no	yes	(5,12]	0			-2.92113	Low SEP	13	negative
month1	7154	2010	Male	2022-03-14	14.8	Loumafori	[50,77]	1	secondary	married	unemployed	peulh	access	access	notaccess	yes	yes	no	yes	(12,35]	0			-3.47293	Low SEP	12	negative
month1	7156	2008	Male	2022-03-14	15	Loumafori	[50,77]	1	secondary	married	unemployed	peulh	access	access	notaccess	yes	yes	no	yes	(12,35]	0			-3.47268	Low SEP	14	negative
month1	7162	2012	Female	2022-03-15	13.3	Hafia	[22,35)	2	secondary	married	fonctionnaire	peulh	notaccess	notaccess	notaccess	no	no	no	no	(5,12]	0			-1.86632	Middle SEP	10	negative
month1	7179	2009	Female	2022-03-16	13.2	Layah	[50,77]	2	no_formal_education	married	unemployed	soussou	notaccess	access	access	no	no	no	no	(5,12]	0			7.09634	High SEP	13	negative
month1	7180	2010	Female	2022-03-16	12.8	Layah	[50,77]	2	no_formal_education	married	unemployed	soussou	notaccess	access	access	no	no	no	no	(5,12]	0			7.09646	High SEP	12	negative
month1	7181	2010	Male	2022-03-16	12.6	Carrefour_Fodéyah	[50,77]	2	secondary	single	unemployed	peulh	access	access	access	yes	yes	no	yes	(5,12]	0			-2.78035	Low SEP	12	negative
month1	7187	2010	Male	2022-03-16	11.8	Carrefour_Fodéyah	[22,35)	1	secondary	married	unemployed	soussou	notaccess	access	access	no	no	no	no	(5,12]	0			7.09734	High SEP	12	negative
month1	7194	2009	Female	2022-03-16	12.2	Carrefour_Fodéyah	[35,50)	1	primary	married	unemployed	soussou	access	access	access	no	no	no	yes	(12,35]	0			-0.226089	High SEP	13	negative
month1	7195	2009	Female	2022-03-16	12.4	Carrefour_Fodéyah	[35,50)	1	primary	married	unemployed	soussou	access	access	access	no	no	no	yes	(12,35]	0			-0.225965	High SEP	13	negative
month1	7196	2011	Male	2022-03-16	16.3	Carrefour_Fodéyah	[35,50)	1	secondary	married	unemployed	autres	access	access	access	yes	yes	no	yes	(12,35]	0			-2.39061	Low SEP	11	negative
month1	7199	2009	Male	2022-03-16	8.6	Carrefour_Fodéyah	[35,50)	1	secondary	married	unemployed	autres	access	access	access	yes	yes	no	yes	(12,35]	0			-2.39023	Low SEP	13	negative
month1	7200	2011	Male	2022-03-16	16	Foulawa	[50,77]	1	secondary	married	fonctionnaire	peulh	access	access	notaccess	yes	yes	no	yes	[3,5]	0			-2.40842	Low SEP	11	negative
month1	7202	2011	Male	2022-03-16	12.8	Foulawa	[50,77]	1	secondary	married	fonctionnaire	peulh	access	access	notaccess	yes	yes	no	yes	[3,5]	0			-2.40817	Low SEP	11	negative
month1	7207	2008	Female	2022-03-17	13.6	Carrefour_Fodéyah	[22,35)	2	secondary	married	unemployed	soussou	notaccess	access	access	no	no	no	yes	[3,5]	0			-2.26994	Low SEP	14	negative
month1	7215	2009	Male	2022-03-17	10.1	Olympio	[50,77]	1	secondary	married	agriculteur	soussou	access	access	notaccess	yes	yes	no	no	(12,35]	0			-1.31464	Middle SEP	13	negative
month1	7216	2012	Female	2022-03-17	12.7	Olympio	[50,77]	1	secondary	married	agriculteur	soussou	access	access	notaccess	yes	yes	no	no	(12,35]	0			-1.31451	Middle SEP	10	negative
month1	7217	2012	Male	2022-03-17	11.9	Olympio	[50,77]	1	secondary	married	agriculteur	soussou	access	access	notaccess	yes	yes	no	no	(12,35]	0			-1.31439	Middle SEP	10	negative
month1	7224	2010	Male	2022-03-17	12.3	Carrefour_Fodéyah	[22,35)	2	primary	married	unemployed	soussou	access	access	notaccess	no	no	no	no	(5,12]	0			7.10195	High SEP	12	negative
month1	7225	2012	Male	2022-03-17	9.4	Carrefour_Fodéyah	[22,35)	2	primary	married	unemployed	soussou	access	access	notaccess	no	no	no	no	(5,12]	0			7.10208	High SEP	10	negative
month1	7234	2008	Male	2022-03-18	15.2	Sarata	[22,35)	2	primary	married	unemployed	soussou	access	access	notaccess	no	no	no	no	(5,12]	643	0	Pf	7.1032	High SEP	14	positive
month1	7235	2009	Male	2022-03-18	15.3	Tanene	[22,35)	2	no_formal_education	married	commerçant	soussou	notaccess	access	notaccess	yes	yes	no	no	(12,35]	0			-2.11056	Middle SEP	13	negative
month1	7241	2011	Female	2022-03-18	14.2	Layah	[35,50)	2	no_formal_education	single	commerçant	soussou	notaccess	notaccess	notaccess	no	no	no	no	(5,12]	364	0	Pf	7.10407	High SEP	11	positive
month1	7260	2009	Female	2022-03-21	10	Kimara	[22,35)	1	secondary	married	fonctionnaire	autres	notaccess	notaccess	notaccess	yes	yes	no	yes	(5,12]	0			-3.12052	Low SEP	13	negative
month1	7265	2009	Female	2022-03-21	13	Kimara	[35,50)	2	primary	married	unemployed	autres	access	access	access	yes	yes	no	yes	[3,5]	0			-3.13482	Low SEP	13	negative
month1	7266	2009	Female	2022-03-21	13.1	Kimara	[35,50)	1	primary	married	unemployed	autres	notaccess	access	notaccess	yes	yes	no	yes	[3,5]	0			0.0283716	High SEP	13	negative
month1	7273	2009	Male	2022-03-21	11.5	Kimara	[50,77]	2	primary	single	commerçant	autres	access	access	notaccess	yes	yes	no	yes	(5,12]	875	0	Pf	0.569268	High SEP	13	positive
month1	7274	2009	Male	2022-03-22	13	Sarata	[35,50)	2	secondary	single	commerçant	soussou	notaccess	notaccess	notaccess	yes	no	no	yes	(5,12]	80	0	Pf	-0.0685308	High SEP	13	positive
month1	7275	2012	Male	2022-03-22	12.6	Sarata	[35,50)	2	secondary	single	commerçant	soussou	notaccess	notaccess	notaccess	yes	no	no	yes	(5,12]	0			-0.0684061	High SEP	10	negative
month1	7277	2010	Female	2022-03-22	9.8	Sarata	[35,50)	2	secondary	single	commerçant	soussou	notaccess	notaccess	notaccess	yes	no	no	yes	(5,12]	0			-0.0681566	High SEP	12	negative
month1	7292	2010	Female	2022-03-22	13.1	Sarata	[50,77]	1	secondary	married	agriculteur	soussou	access	access	notaccess	no	no	no	yes	(5,12]	185	0	Pf	-0.242698	Middle SEP	12	positive
month1	7298	2010	Male	2022-03-22	11	Tanene	[22,35)	2	no_formal_education	married	commerçant	soussou	notaccess	access	notaccess	no	no	no	no	(5,12]	0			7.11118	High SEP	12	negative
month1	7304	2010	Male	2022-03-22	11.7	Foulawa	[35,50)	1	secondary	married	fonctionnaire	peulh	notaccess	access	access	no	no	no	no	(5,12]	0			7.11193	High SEP	12	negative
month1	7311	2010	Female	2022-03-22	14.4	Olympio	[22,35)	2	primary	married	unemployed	peulh	notaccess	access	access	no	no	no	no	(5,12]	0			7.11281	High SEP	12	negative
month1	7315	2009	Female	2022-03-22	15.2	Sarata	[50,77]	1	no_formal_education	married	agriculteur	soussou	notaccess	notaccess	notaccess	no	no	no	no	(5,12]	0			7.1133	High SEP	13	negative
month1	7316	2010	Male	2022-03-22	12.2	Sarata	[50,77]	1	no_formal_education	married	agriculteur	soussou	notaccess	notaccess	notaccess	no	no	no	no	(5,12]	0			7.11343	High SEP	12	negative
month1	7317	2012	Male	2022-03-22	11.4	Sarata	[50,77]	1	no_formal_education	married	agriculteur	soussou	notaccess	notaccess	notaccess	no	no	no	no	(5,12]	0			7.11355	High SEP	10	negative
month1	7323	2009	Male	2022-03-23	12.7	Layah	[35,50)	2	no_formal_education	married	commerçant	soussou	notaccess	notaccess	notaccess	yes	yes	no	yes	[3,5]	0			-0.669131	Middle SEP	13	negative
month1	7324	2011	Female	2022-03-23	6.9	Layah	[35,50)	2	no_formal_education	married	commerçant	soussou	notaccess	notaccess	notaccess	yes	yes	no	yes	[3,5]	32300	0	Pf	-0.669006	Middle SEP	11	positive
month1	7338	2010	Female	2022-03-23	9.9	Maire_daouda	[22,35)	2	secondary	married	unemployed	soussou	access	access	access	yes	yes	no	yes	(5,12]	0			-2.21693	Low SEP	12	negative
month1	7344	2010	Female	2022-03-24	11.8	Layah	[35,50)	2	no_formal_education	married	commerçant	soussou	notaccess	notaccess	notaccess	yes	yes	no	yes	[3,5]	0			-0.666511	Middle SEP	12	negative
month1	7347	2010	Female	2022-03-24	13.4	Layah	[35,50)	2	no_formal_education	married	commerçant	soussou	notaccess	notaccess	notaccess	no	no	no	no	(5,12]	0			7.1173	High SEP	12	negative
month1	7359	2008	Male	2022-03-24	7.2	Layah	[22,35)	2	secondary	married	unemployed	soussou	notaccess	access	access	no	no	no	no	(5,12]	0			-3.28043	Low SEP	14	negative
month1	7372	2012	Female	2022-03-24	12.5	Hafia	[35,50)	2	no_formal_education	married	commerçant	peulh	access	access	access	no	no	no	no	(5,12]	0			-3.2721	Low SEP	10	negative
month1	7374	2010	Female	2022-03-24	11	Hafia	[35,50)	2	no_formal_education	married	commerçant	peulh	access	access	access	no	no	no	no	(5,12]	0			-3.27185	Low SEP	12	negative
month1	7383	2009	Female	2022-03-25	11.4	Hafia	[50,77]	2	no_formal_education	single	commerçant	autres	notaccess	notaccess	notaccess	yes	yes	no	no	(5,12]	0			-0.716141	Middle SEP	13	negative
month1	7391	2008	Male	2022-03-25	14.3	Loumafori	[50,77]	1	no_formal_education	married	unemployed	peulh	notaccess	access	notaccess	yes	yes	no	no	(12,35]	0			-3.06527	Low SEP	14	negative
month2	7002	2008	Female	2022-04-25	15.9	Carrefour_Fodéyah	[50,77]	1	secondary	married	fonctionnaire	peulh	access	notaccess	notaccess	yes	yes	no	yes	[3,5]	0			-3.62044	Low SEP	14	negative
month2	7006	2008	Female	2022-04-25	9.8	Foulawa	[35,50)	1	secondary	married	commerçant	peulh	access	access	notaccess	yes	yes	no	yes	(5,12]	0			-1.44802	Middle SEP	14	negative
month2	7013	2009	Female	2022-04-25	12.3	Foulawa	[50,77]	1	no_formal_education	married	unemployed	peulh	access	access	notaccess	no	no	no	yes	(5,12]	0			-0.420177	Middle SEP	13	negative
month2	7015	2010	Male	2022-04-25	9.9	Foulawa	[50,77]	1	no_formal_education	married	unemployed	peulh	access	access	notaccess	no	no	no	yes	(5,12]	0			-0.419928	Middle SEP	12	negative
month2	7018	2012	Female	2022-04-25	12.2	Carrefour_Fodéyah	[50,77]	1	secondary	married	fonctionnaire	peulh	access	notaccess	notaccess	yes	yes	no	yes	[3,5]	0			-3.61844	Low SEP	10	negative
month2	7022	2011	Male	2022-04-26	14.8	Foulawa	[50,77]	1	no_formal_education	married	agriculteur	peulh	notaccess	notaccess	notaccess	no	no	no	no	(5,12]	0			7.07676	High SEP	11	negative
month2	7032	2010	Male	2022-04-25	16.2	Foulawa	[22,35)	2	secondary	married	fonctionnaire	peulh	notaccess	access	access	yes	yes	no	no	[3,5]	0			-0.377383	Middle SEP	12	negative
month2	7038	2008	Male	2022-04-25	11.6	Hafia	[22,35)	2	secondary	married	commerçant	peulh	notaccess	notaccess	access	yes	yes	no	yes	[3,5]	0			-2.24545	Low SEP	14	negative
month2	7048	2008	Female	2022-04-29	11.5	Layah	[50,77]	2	secondary	married	agriculteur	soussou	notaccess	access	notaccess	yes	yes	yes	yes	(12,35]	0			-1.22226	Middle SEP	14	negative
month2	7049	2011	Male	2022-04-29	11.5	Layah	[50,77]	2	secondary	married	agriculteur	soussou	notaccess	access	notaccess	yes	yes	yes	yes	(12,35]	0			-1.22214	Middle SEP	11	negative
month2	7052	2010	Female	2022-04-27	12.5	Layah	[50,77]	2	no_formal_education	married	unemployed	soussou	notaccess	access	access	no	no	no	yes	(5,12]	0			-2.885	Low SEP	12	negative
month2	7056	2012	Male	2022-04-29	11.5	Carrefour_Fodéyah	[35,50)	1	primary	married	unemployed	soussou	access	access	access	no	no	no	no	(5,12]	0			7.081	High SEP	10	negative
month2	7057	2012	Female	2022-04-29	12.4	Carrefour_Fodéyah	[35,50)	1	primary	married	unemployed	soussou	access	access	access	no	no	no	no	(5,12]	0			7.08112	High SEP	10	negative
month2	7061	2010	Male	2022-04-29	11.7	Carrefour_Fodéyah	[35,50)	1	primary	married	unemployed	soussou	access	access	access	no	no	no	no	(5,12]	0			7.08162	High SEP	12	negative
month2	7064	2008	Male	2022-04-29	8.48	Layah	[35,50)	2	secondary	married	unemployed	soussou	access	access	access	no	no	no	yes	[3,5]	0			-2.08031	Middle SEP	14	negative
month2	7065	2011	Female	2022-04-29	8.51	Layah	[35,50)	2	secondary	married	unemployed	soussou	access	access	access	no	no	no	yes	[3,5]	0			-2.08019	Middle SEP	11	negative
month2	7070	2011	Male	2022-04-29	11.6	Layah	[35,50)	2	no_formal_education	married	unemployed	soussou	notaccess	notaccess	notaccess	no	no	no	yes	(5,12]	0			-2.01029	Middle SEP	11	negative
month2	7071	2010	Male	2022-04-29	12.7	Layah	[35,50)	2	no_formal_education	married	unemployed	soussou	notaccess	notaccess	notaccess	no	no	no	yes	(5,12]	0			-2.01016	Middle SEP	12	negative
month2	7081	2010	Male	2022-04-27	11.5	Layah	[35,50)	2	no_formal_education	married	unemployed	soussou	access	access	notaccess	yes	yes	no	no	(5,12]	0			0.643027	High SEP	12	negative
month2	7087	2008	Female	2022-05-04	8.55	Loumafori	[35,50)	2	secondary	married	unemployed	autres	notaccess	access	notaccess	yes	yes	no	no	[3,5]	0			-0.130631	High SEP	14	negative
month2	7098	2010	Male	2022-05-04	12.4	Olympio	[22,35)	2	primary	married	unemployed	autres	access	access	access	yes	yes	no	yes	(5,12]	0			-0.391305	Middle SEP	12	negative
month2	7108	2010	Male	2022-05-04	15.1	Olympio	[35,50)	2	secondary	married	commerçant	peulh	notaccess	access	notaccess	yes	yes	no	no	(5,12]	0			-1.12838	Middle SEP	12	negative
month2	7112	2009	Female	2022-05-04	10.8	Olympio	[22,35)	2	primary	married	unemployed	peulh	notaccess	access	access	yes	yes	no	yes	[3,5]	0			-2.22735	Low SEP	13	negative
month2	7113	2010	Female	2022-05-04	10.6	Olympio	[22,35)	2	primary	married	unemployed	peulh	notaccess	access	access	yes	yes	no	yes	[3,5]	0			-2.22723	Low SEP	12	negative
month2	7116	2010	Male	2022-05-04	14	Olympio	[35,50)	2	no_formal_education	married	commerçant	peulh	notaccess	notaccess	notaccess	yes	no	no	yes	(5,12]	0			-2.94599	Low SEP	12	negative
month2	7117	2012	Female	2022-05-04	13.1	Olympio	[35,50)	2	no_formal_education	married	commerçant	peulh	notaccess	notaccess	notaccess	yes	no	no	yes	(5,12]	0			-2.94586	Low SEP	10	negative
month2	7131	2012	Female	2022-05-06	12.2	Loumafori	[50,77]	1	secondary	married	unemployed	soussou	notaccess	notaccess	notaccess	yes	yes	no	yes	(5,12]	0			0.331091	High SEP	10	negative
month2	7133	2010	Male	2022-05-16	13.5	Hafia	[22,35)	2	secondary	married	unemployed	autres	notaccess	access	access	yes	yes	no	yes	(5,12]	0			-2.60487	Low SEP	12	negative
month2	7136	2009	Female	2022-05-16	12.5	Hafia	[22,35)	2	secondary	married	unemployed	autres	notaccess	access	access	yes	yes	no	yes	(5,12]	0			-2.6045	Low SEP	13	negative
month2	7154	2010	Male	2022-05-09	13.9	Loumafori	[50,77]	1	secondary	married	unemployed	peulh	access	access	notaccess	yes	yes	no	yes	(12,35]	0			-3.47293	Low SEP	12	negative
month2	7156	2008	Male	2022-05-09	14.5	Loumafori	[50,77]	1	secondary	married	unemployed	peulh	access	access	notaccess	yes	yes	no	yes	(12,35]	0			-3.47268	Low SEP	14	negative
month2	7162	2012	Female	2022-05-17	13.2	Hafia	[22,35)	2	secondary	married	fonctionnaire	peulh	notaccess	notaccess	notaccess	no	no	no	no	(5,12]	0			-1.86632	Middle SEP	10	negative
month2	7179	2009	Female	2022-05-11	10.6	Layah	[50,77]	2	no_formal_education	married	unemployed	soussou	notaccess	access	access	no	no	no	no	(5,12]	0			7.09634	High SEP	13	negative
month2	7180	2010	Female	2022-05-11	10.7	Layah	[50,77]	2	no_formal_education	married	unemployed	soussou	notaccess	access	access	no	no	no	no	(5,12]	0			7.09646	High SEP	12	negative
month2	7181	2010	Male	2022-05-11	11.4	Carrefour_Fodéyah	[50,77]	2	secondary	single	unemployed	peulh	access	access	access	yes	yes	no	yes	(5,12]	160	0	Pf	-2.78035	Low SEP	12	positive
month2	7187	2010	Male	2022-05-12	12.7	Carrefour_Fodéyah	[22,35)	1	secondary	married	unemployed	soussou	notaccess	access	access	no	no	no	no	(5,12]	0			7.09734	High SEP	12	negative
month2	7194	2009	Female	2022-05-12	12.5	Carrefour_Fodéyah	[35,50)	1	primary	married	unemployed	soussou	access	access	access	no	no	no	yes	(12,35]	0			-0.226089	High SEP	13	negative
month2	7195	2009	Female	2022-05-12	13.5	Carrefour_Fodéyah	[35,50)	1	primary	married	unemployed	soussou	access	access	access	no	no	no	yes	(12,35]	0			-0.225965	High SEP	13	negative
month2	7196	2011	Male	2022-05-11	15.9	Carrefour_Fodéyah	[35,50)	1	secondary	married	unemployed	autres	access	access	access	yes	yes	no	yes	(12,35]	0			-2.39061	Low SEP	11	negative
month2	7199	2009	Male	2022-05-11	7.7	Carrefour_Fodéyah	[35,50)	1	secondary	married	unemployed	autres	access	access	access	yes	yes	no	yes	(12,35]	0			-2.39023	Low SEP	13	negative
month2	7200	2011	Male	2022-05-11	14.9	Foulawa	[50,77]	1	secondary	married	fonctionnaire	peulh	access	access	notaccess	yes	yes	no	yes	[3,5]	0			-2.40842	Low SEP	11	negative
month2	7202	2011	Male	2022-05-11	11.9	Foulawa	[50,77]	1	secondary	married	fonctionnaire	peulh	access	access	notaccess	yes	yes	no	yes	[3,5]	0			-2.40817	Low SEP	11	negative
month2	7207	2008	Female	2022-05-11	11.3	Carrefour_Fodéyah	[22,35)	2	secondary	married	unemployed	soussou	notaccess	access	access	no	no	no	yes	[3,5]	0			-2.26994	Low SEP	14	negative
month2	7215	2009	Male	2022-05-18	10.8	Olympio	[50,77]	1	secondary	married	agriculteur	soussou	access	access	notaccess	yes	yes	no	no	(12,35]	0			-1.31464	Middle SEP	13	negative
month2	7216	2012	Female	2022-05-18	12.1	Olympio	[50,77]	1	secondary	married	agriculteur	soussou	access	access	notaccess	yes	yes	no	no	(12,35]	0			-1.31451	Middle SEP	10	negative
month2	7217	2012	Male	2022-05-18	11.9	Olympio	[50,77]	1	secondary	married	agriculteur	soussou	access	access	notaccess	yes	yes	no	no	(12,35]	0			-1.31439	Middle SEP	10	negative
month2	7224	2010	Male	2022-05-18	12.1	Carrefour_Fodéyah	[22,35)	2	primary	married	unemployed	soussou	access	access	notaccess	no	no	no	no	(5,12]	0			7.10195	High SEP	12	negative
month2	7225	2012	Male	2022-05-18	9.4	Carrefour_Fodéyah	[22,35)	2	primary	married	unemployed	soussou	access	access	notaccess	no	no	no	no	(5,12]	0			7.10208	High SEP	10	negative
month2	7235	2009	Male	2022-05-18	14.5	Tanene	[22,35)	2	no_formal_education	married	commerçant	soussou	notaccess	access	notaccess	yes	yes	no	no	(12,35]	0			-2.11056	Middle SEP	13	negative
month2	7260	2009	Female	2022-05-09	10.3	Kimara	[22,35)	1	secondary	married	fonctionnaire	autres	notaccess	notaccess	notaccess	yes	yes	no	yes	(5,12]	0			-3.12052	Low SEP	13	negative
month2	7265	2009	Female	2022-05-09	12.6	Kimara	[35,50)	2	primary	married	unemployed	autres	access	access	access	yes	yes	no	yes	[3,5]	0			-3.13482	Low SEP	13	negative
month2	7266	2009	Female	2022-05-09	13.9	Kimara	[35,50)	1	primary	married	unemployed	autres	notaccess	access	notaccess	yes	yes	no	yes	[3,5]	0			0.0283716	High SEP	13	negative
month2	7273	2009	Male	2022-05-11	12.2	Kimara	[50,77]	2	primary	single	commerçant	autres	access	access	notaccess	yes	yes	no	yes	(5,12]	0			0.569268	High SEP	13	negative
month2	7274	2009	Male	2022-05-17	10.8	Sarata	[35,50)	2	secondary	single	commerçant	soussou	notaccess	notaccess	notaccess	yes	no	no	yes	(5,12]	0			-0.0685308	High SEP	13	negative
month2	7275	2012	Male	2022-05-17	12.6	Sarata	[35,50)	2	secondary	single	commerçant	soussou	notaccess	notaccess	notaccess	yes	no	no	yes	(5,12]	0			-0.0684061	High SEP	10	negative
month2	7277	2010	Female	2022-05-17	9.9	Sarata	[35,50)	2	secondary	single	commerçant	soussou	notaccess	notaccess	notaccess	yes	no	no	yes	(5,12]	0			-0.0681566	High SEP	12	negative
month2	7292	2010	Female	2022-05-13	13	Sarata	[50,77]	1	secondary	married	agriculteur	soussou	access	access	notaccess	no	no	no	yes	(5,12]	7360	0	Pf	-0.242698	Middle SEP	12	positive
month2	7298	2010	Male	2022-05-13	10.4	Tanene	[22,35)	2	no_formal_education	married	commerçant	soussou	notaccess	access	notaccess	no	no	no	no	(5,12]	0			7.11118	High SEP	12	negative
month2	7304	2010	Male	2022-05-16	14.7	Foulawa	[35,50)	1	secondary	married	fonctionnaire	peulh	notaccess	access	access	no	no	no	no	(5,12]	0			7.11193	High SEP	12	negative
month2	7338	2010	Female	2022-05-27	10	Maire_daouda	[22,35)	2	secondary	married	unemployed	soussou	access	access	access	yes	yes	no	yes	(5,12]	0			-2.21693	Low SEP	12	negative
month2	7344	2010	Female	2022-04-27	12.2	Layah	[35,50)	2	no_formal_education	married	commerçant	soussou	notaccess	notaccess	notaccess	yes	yes	no	yes	[3,5]	0			-0.666511	Middle SEP	12	negative
month2	7347	2010	Female	2022-04-27	12.7	Layah	[35,50)	2	no_formal_education	married	commerçant	soussou	notaccess	notaccess	notaccess	no	no	no	no	(5,12]	0			7.1173	High SEP	12	negative
month2	7359	2008	Male	2022-04-29	8.4	Layah	[22,35)	2	secondary	married	unemployed	soussou	notaccess	access	access	no	no	no	no	(5,12]	0			-3.28043	Low SEP	14	negative
month2	7372	2012	Female	2022-05-18	11.9	Hafia	[35,50)	2	no_formal_education	married	commerçant	peulh	access	access	access	no	no	no	no	(5,12]	0			-3.2721	Low SEP	10	negative
month2	7374	2010	Female	2022-05-18	11.3	Hafia	[35,50)	2	no_formal_education	married	commerçant	peulh	access	access	access	no	no	no	no	(5,12]	0			-3.27185	Low SEP	12	negative
month2	7383	2009	Female	2022-05-17	11.9	Hafia	[50,77]	2	no_formal_education	single	commerçant	autres	notaccess	notaccess	notaccess	yes	yes	no	no	(5,12]	0			-0.716141	Middle SEP	13	negative
month2	7391	2008	Male	2022-05-06	14.2	Loumafori	[50,77]	1	no_formal_education	married	unemployed	peulh	notaccess	access	notaccess	yes	yes	no	no	(12,35]	0			-3.06527	Low SEP	14	negative
month2	7393		Male		11.9	Layah	[35,50)	2	no_formal_education	married	unemployed	soussou	access	access	access	no	no	no	no	(5,12]	406	0	Pf	-3.06502	Low SEP	11	positive
month3	7002	2008	Male	2022-06-16	17	Carrefour_Fodéyah	[50,77]	1	secondary	married	fonctionnaire	peulh	access	notaccess	notaccess	yes	yes	no	yes	[3,5]	0			-3.62044	Low SEP	14	negative
month3	7006	2011	Male	2022-06-15	11.3	Foulawa	[35,50)	1	secondary	married	commerçant	peulh	access	access	notaccess	yes	yes	no	yes	(5,12]	0			-1.44802	Middle SEP	11	negative
month3	7013	2010	Female	2022-06-15	12.9	Foulawa	[50,77]	1	no_formal_education	married	unemployed	peulh	access	access	notaccess	no	no	no	yes	(5,12]	0			-0.420177	Middle SEP	12	negative
month3	7029	2009	Male	2022-06-15	12.3	Carrefour_Fodéyah	[35,50)	2	secondary	married	unemployed	peulh	notaccess	access	access	no	no	no	yes	[3,5]	0			-4.49334	Low SEP	13	negative
month3	7034	2009	Male	2022-06-15	13	Foulawa	[22,35)	2	secondary	married	fonctionnaire	peulh	notaccess	access	access	yes	yes	no	no	[3,5]	0			-0.377134	Middle SEP	13	negative
month3	7042	2008	Male	2022-06-15	12.3	Foulawa	[50,77]	1	secondary	married	fonctionnaire	peulh	access	access	access	no	no	no	no	(5,12]	6180	0	Pm	-4.26904	Low SEP	14	positive
month3	7048	2008	Female	2022-06-20	12.5	Layah	[50,77]	2	secondary	married	agriculteur	soussou	notaccess	access	notaccess	yes	yes	yes	yes	(12,35]	0			-1.22226	Middle SEP	14	negative
month3	7049	2011	Male	2022-06-20	12.1	Layah	[50,77]	2	secondary	married	agriculteur	soussou	notaccess	access	notaccess	yes	yes	yes	yes	(12,35]	0			-1.22214	Middle SEP	11	negative
month3	7052	2010	Female	2022-06-17	13.9	Layah	[50,77]	2	no_formal_education	married	unemployed	soussou	notaccess	access	access	no	no	no	yes	(5,12]	0			-2.885	Low SEP	12	negative
month3	7056	2012	Male	2022-06-20	12	Carrefour_Fodéyah	[35,50)	1	primary	married	unemployed	soussou	access	access	access	no	no	no	no	(5,12]	10400	0	Pf	7.081	High SEP	10	positive
month3	7057	2012	Female	2022-06-20	9.9	Carrefour_Fodéyah	[35,50)	1	primary	married	unemployed	soussou	access	access	access	no	no	no	no	(5,12]	160	0	Pf	7.08112	High SEP	10	positive
month3	7061	2010	Male	2022-06-20	12.9	Carrefour_Fodéyah	[35,50)	1	primary	married	unemployed	soussou	access	access	access	no	no	no	no	(5,12]	0			7.08162	High SEP	12	negative
month3	7064	2008	Male	2022-06-17	13.7	Layah	[35,50)	2	secondary	married	unemployed	soussou	access	access	access	no	no	no	yes	[3,5]	0			-2.08031	Middle SEP	14	negative
month3	7065	2011	Female	2022-06-17	12.7	Layah	[35,50)	2	secondary	married	unemployed	soussou	access	access	access	no	no	no	yes	[3,5]	0			-2.08019	Middle SEP	11	negative
month3	7070	2011	Male	2022-06-20	11.7	Layah	[35,50)	2	no_formal_education	married	unemployed	soussou	notaccess	notaccess	notaccess	no	no	no	yes	(5,12]	0			-2.01029	Middle SEP	11	negative
month3	7071	2010	Male	2022-06-20	12.1	Layah	[35,50)	2	no_formal_education	married	unemployed	soussou	notaccess	notaccess	notaccess	no	no	no	yes	(5,12]	0			-2.01016	Middle SEP	12	negative
month3	7081	2010	Male	2022-06-17	11	Layah	[35,50)	2	no_formal_education	married	unemployed	soussou	access	access	notaccess	yes	yes	no	no	(5,12]	0			0.643027	High SEP	12	negative
month3	7087	2008	Female	2022-06-29	10.3	Loumafori	[35,50)	2	secondary	married	unemployed	autres	notaccess	access	notaccess	yes	yes	no	no	[3,5]	0			-0.130631	High SEP	14	negative
month3	7098	2010	Male	2022-06-29	9.7	Olympio	[22,35)	2	primary	married	unemployed	autres	access	access	access	yes	yes	no	yes	(5,12]	0			-0.391305	Middle SEP	12	negative
month3	7108	2010	Male	2022-06-27	14.3	Olympio	[35,50)	2	secondary	married	commerçant	peulh	notaccess	access	notaccess	yes	yes	no	no	(5,12]	0			-1.12838	Middle SEP	12	negative
month3	7112	2009	Female	2022-06-29	12.4	Olympio	[22,35)	2	primary	married	unemployed	peulh	notaccess	access	access	yes	yes	no	yes	[3,5]	0			-2.22735	Low SEP	13	negative
month3	7113	2010	Female	2022-06-29	11	Olympio	[22,35)	2	primary	married	unemployed	peulh	notaccess	access	access	yes	yes	no	yes	[3,5]	0			-2.22723	Low SEP	12	negative
month3	7116	2010	Male	2022-06-30	13.7	Olympio	[35,50)	2	no_formal_education	married	commerçant	peulh	notaccess	notaccess	notaccess	yes	no	no	yes	(5,12]	0			-2.94599	Low SEP	12	negative
month3	7117	2012	Female	2022-06-30	13.2	Olympio	[35,50)	2	no_formal_education	married	commerçant	peulh	notaccess	notaccess	notaccess	yes	no	no	yes	(5,12]	0			-2.94586	Low SEP	10	negative
month3	7131	2012	Female	2022-06-21	11.2	Loumafori	[50,77]	1	secondary	married	unemployed	soussou	notaccess	notaccess	notaccess	yes	yes	no	yes	(5,12]	0			0.331091	High SEP	10	negative
month3	7133	2010	Male	2022-06-27	14.2	Hafia	[22,35)	2	secondary	married	unemployed	autres	notaccess	access	access	yes	yes	no	yes	(5,12]	0			-2.60487	Low SEP	12	negative
month3	7136	2009	Female	2022-06-27	13.6	Hafia	[22,35)	2	secondary	married	unemployed	autres	notaccess	access	access	yes	yes	no	yes	(5,12]	0			-2.6045	Low SEP	13	negative
month3	7141	2009	Male	2022-06-27	8.4	Loumafori	[50,77]	1	no_formal_education	married	agriculteur	soussou	access	access	notaccess	yes	yes	no	yes	(5,12]	0			-2.92113	Low SEP	13	negative
month3	7154	2010	Male	2022-06-21	14.6	Loumafori	[50,77]	1	secondary	married	unemployed	peulh	access	access	notaccess	yes	yes	no	yes	(12,35]	0			-3.47293	Low SEP	12	negative
month3	7156	2008	Male	2022-06-21	14.2	Loumafori	[50,77]	1	secondary	married	unemployed	peulh	access	access	notaccess	yes	yes	no	yes	(12,35]	0			-3.47268	Low SEP	14	negative
month3	7162	2012	Female	2022-06-13	13.8	Hafia	[22,35)	2	secondary	married	fonctionnaire	peulh	notaccess	notaccess	notaccess	no	no	no	no	(5,12]	0			-1.86632	Middle SEP	10	negative
month3	7179	2009	Female	2022-06-23	12.9	Layah	[50,77]	2	no_formal_education	married	unemployed	soussou	notaccess	access	access	no	no	no	no	(5,12]	0			7.09634	High SEP	13	negative
month3	7180	2010	Female	2022-06-23	12.4	Layah	[50,77]	2	no_formal_education	married	unemployed	soussou	notaccess	access	access	no	no	no	no	(5,12]	0			7.09646	High SEP	12	negative
month3	7181	2010	Male	2022-06-15	13.9	Carrefour_Fodéyah	[50,77]	2	secondary	single	unemployed	peulh	access	access	access	yes	yes	no	yes	(5,12]	511	8	Pf	-2.78035	Low SEP	12	positive
month3	7187	2010	Male	2022-06-23	11.5	Carrefour_Fodéyah	[22,35)	1	secondary	married	unemployed	soussou	notaccess	access	access	no	no	no	no	(5,12]	0			7.09734	High SEP	12	negative
month3	7194	2009	Female	2022-06-24	12.2	Carrefour_Fodéyah	[35,50)	1	primary	married	unemployed	soussou	access	access	access	no	no	no	yes	(12,35]	0			-0.226089	High SEP	13	negative
month3	7195	2009	Female	2022-06-24	13	Carrefour_Fodéyah	[35,50)	1	primary	married	unemployed	soussou	access	access	access	no	no	no	yes	(12,35]	0			-0.225965	High SEP	13	negative
month3	7196	2011	Male	2022-06-20	15.3	Carrefour_Fodéyah	[35,50)	1	secondary	married	unemployed	autres	access	access	access	yes	yes	no	yes	(12,35]	0			-2.39061	Low SEP	11	negative
month3	7199	2009	Male	2022-06-20	9.2	Carrefour_Fodéyah	[35,50)	1	secondary	married	unemployed	autres	access	access	access	yes	yes	no	yes	(12,35]	0			-2.39023	Low SEP	13	negative
month3	7200	2011	Male	2022-06-24	15.7	Foulawa	[50,77]	1	secondary	married	fonctionnaire	peulh	access	access	notaccess	yes	yes	no	yes	[3,5]	0			-2.40842	Low SEP	11	negative
month3	7202	2011	Male	2022-06-23	11.5	Foulawa	[50,77]	1	secondary	married	fonctionnaire	peulh	access	access	notaccess	yes	yes	no	yes	[3,5]	0			-2.40817	Low SEP	11	negative
month3	7207	2008	Female	2022-06-29	12.1	Carrefour_Fodéyah	[22,35)	2	secondary	married	unemployed	soussou	notaccess	access	access	no	no	no	yes	[3,5]	0			-2.26994	Low SEP	14	negative
month3	7215	2009	Male	2022-07-04	11.8	Olympio	[50,77]	1	secondary	married	agriculteur	soussou	access	access	notaccess	yes	yes	no	no	(12,35]	1720	0	Pf	-1.31464	Middle SEP	13	positive
month3	7216	2012	Female	2022-07-04	9.8	Olympio	[50,77]	1	secondary	married	agriculteur	soussou	access	access	notaccess	yes	yes	no	no	(12,35]	0			-1.31451	Middle SEP	10	negative
month3	7217	2012	Male	2022-07-04	11.3	Olympio	[50,77]	1	secondary	married	agriculteur	soussou	access	access	notaccess	yes	yes	no	no	(12,35]	0			-1.31439	Middle SEP	10	negative
month3	7224	2010	Male	2022-07-05	11.3	Carrefour_Fodéyah	[22,35)	2	primary	married	unemployed	soussou	access	access	notaccess	no	no	no	no	(5,12]	0			7.10195	High SEP	12	negative
month3	7225	2012	Male	2022-07-05	9.8	Carrefour_Fodéyah	[22,35)	2	primary	married	unemployed	soussou	access	access	notaccess	no	no	no	no	(5,12]	128	0	Pf	7.10208	High SEP	10	positive
month3	7235	2009	Male	2022-07-04	14.4	Tanene	[22,35)	2	no_formal_education	married	commerçant	soussou	notaccess	access	notaccess	yes	yes	no	no	(12,35]	0			-2.11056	Middle SEP	13	negative
month3	7241	2011	Female	2022-07-05	10.06	Hafia	[35,50)	1	secondary	single	commerçant	soussou	access	notaccess	notaccess	no	no	no	no	(5,12]	0			7.10407	High SEP	11	negative
month3	7260	2009	Female	2022-06-30	10.1	Kimara	[22,35)	1	secondary	married	fonctionnaire	autres	notaccess	notaccess	notaccess	yes	yes	no	yes	(5,12]	0			-3.12052	Low SEP	13	negative
month3	7265	2009	Female	2022-06-30	10.35	Kimara	[35,50)	2	primary	married	unemployed	autres	access	access	access	yes	yes	no	yes	[3,5]	0			-3.13482	Low SEP	13	negative
month3	7266	2009	Female	2022-06-29	14.8	Kimara	[35,50)	1	primary	married	unemployed	autres	notaccess	access	notaccess	yes	yes	no	yes	[3,5]	0			0.0283716	High SEP	13	negative
month3	7274	2009	Male	2022-06-27	11.7	Sarata	[35,50)	2	secondary	single	commerçant	soussou	notaccess	notaccess	notaccess	yes	no	no	yes	(5,12]	0			-0.0685308	High SEP	13	negative
month3	7275	2012	Male	2022-06-27	11.2	Sarata	[35,50)	2	secondary	single	commerçant	soussou	notaccess	notaccess	notaccess	yes	no	no	yes	(5,12]	0			-0.0684061	High SEP	10	negative
month3	7277	2010	Female	2022-06-27	8.8	Sarata	[35,50)	2	secondary	single	commerçant	soussou	notaccess	notaccess	notaccess	yes	no	no	yes	(5,12]	0			-0.0681566	High SEP	12	negative
month3	7292	2010	Female	2022-06-27	11.9	Sarata	[50,77]	1	secondary	married	agriculteur	soussou	access	access	notaccess	no	no	no	yes	(5,12]	0			-0.242698	Middle SEP	12	negative
month3	7298	2010	Male	2022-06-27	9.9	Tanene	[22,35)	2	no_formal_education	married	commerçant	soussou	notaccess	access	notaccess	no	no	no	no	(5,12]	0			7.11118	High SEP	12	negative
month3	7304	2010	Male	2022-06-29	13.1	Foulawa	[35,50)	1	secondary	married	fonctionnaire	peulh	notaccess	access	access	no	no	no	no	(5,12]	0			7.11193	High SEP	12	negative
month3	7323	2009	Male	2022-06-20	11.8	Layah	[35,50)	2	no_formal_education	married	commerçant	soussou	notaccess	notaccess	notaccess	yes	yes	no	yes	[3,5]	0			-0.669131	Middle SEP	13	negative
month3	7324	2011	Female	2022-06-20	8.3	Layah	[35,50)	2	no_formal_education	married	commerçant	soussou	notaccess	notaccess	notaccess	yes	yes	no	yes	[3,5]	854	0	Pf	-0.669006	Middle SEP	11	positive
month3	7338	2010	Female	2022-07-04	12.2	Maire_daouda	[22,35)	2	secondary	married	unemployed	soussou	access	access	access	yes	yes	no	yes	(5,12]	0			-2.21693	Low SEP	12	negative
month3	7344	2010	Female	2022-06-20	11.7	Layah	[35,50)	2	no_formal_education	married	commerçant	soussou	notaccess	notaccess	notaccess	yes	yes	no	yes	[3,5]	0			-0.666511	Middle SEP	12	negative
month3	7347	2010	Female	2022-06-20	11.8	Layah	[35,50)	2	no_formal_education	married	commerçant	soussou	notaccess	notaccess	notaccess	no	no	no	no	(5,12]	0			7.1173	High SEP	12	negative
month3	7359	2008	Male	2022-06-21	9.5	Layah	[22,35)	2	secondary	married	unemployed	soussou	notaccess	access	access	no	no	no	no	(5,12]	0			-3.28043	Low SEP	14	negative
month3	7372	2012	Female	2022-06-27	12.2	Hafia	[35,50)	2	no_formal_education	married	commerçant	peulh	access	access	access	no	no	no	no	(5,12]	0			-3.2721	Low SEP	10	negative
month3	7374	2010	Female	2022-06-27	13.1	Hafia	[35,50)	2	no_formal_education	married	commerçant	peulh	access	access	access	no	no	no	no	(5,12]	0			-3.27185	Low SEP	12	negative
month3	7383	2009	Female	2022-06-28	12.3	Hafia	[50,77]	2	no_formal_education	single	commerçant	autres	notaccess	notaccess	notaccess	yes	yes	no	no	(5,12]	0			-0.716141	Middle SEP	13	negative
month3	7391	2008	Male	2022-06-21	10.6	Loumafori	[50,77]	1	no_formal_education	married	unemployed	peulh	notaccess	access	notaccess	yes	yes	no	no	(12,35]	0			-3.06527	Low SEP	14	negative
month3	7271		Female		7.6	Layah	[35,50)	2	no_formal_education	married	commerçant	soussou	notaccess	notaccess	notaccess	no	no	no	no	(5,12]	22060	0	Pf	0.569019	High SEP	11	positive
month3	7312		Female		12.2	Kimara	[35,50)	2	primary	married	fonctionnaire	autres	access	access	notaccess	no	no	no	no	(5,12]	189	0	Pf	7.11293	High SEP	11	positive
month3	7395		Female		13	Layah	[35,50)	2	no_formal_education	married	fonctionnaire	autres	notaccess	notaccess	notaccess	no	no	no	no	(5,12]	12320	0	Pf	-0.433272	Middle SEP	11	positive
month3	7398		Male		5.9	Layah	[35,50)	2	no_formal_education	married	fonctionnaire	autres	access	access	notaccess	no	no	no	no	(5,12]	897	0	Pf	-0.432898	Middle SEP	11	positive
month3	7393		Male		11.9	Foulawa	[35,50)	1	secondary	married	fonctionnaire	peulh	access	access	notaccess	no	no	no	no	(5,12]	1057	0	Pf	-3.06502	Low SEP	11	positive
month3	7095		Male		12	Carrefour_Fodéyah	[35,50)	1	secondary	married	fonctionnaire	peulh	notaccess	notaccess	notaccess	no	no	no	no	(5,12]	280	0	Pf	7.08586	High SEP	11	positive
month3	7026		Female		12	Hafia	[35,50)	2	no_formal_education	married	commerçant	peulh	notaccess	notaccess	notaccess	no	no	no	no	(5,12]	250	0	Pf	7.07725	High SEP	11	positive
month4	7001	2010	Male	2022-08-03	15.1	Foulawa	[35,50)	1	secondary	married	fonctionnaire	peulh	notaccess	access	access	no	no	no	yes	(12,35]	0			-2.4773	Low SEP	12	negative
month4	7008	2011	Male	2022-08-02	10.9	Foulawa	[50,77]	1	secondary	married	unemployed	peulh	notaccess	access	access	yes	yes	no	yes	(5,12]	0			-3.45246	Low SEP	11	negative
month4	7010	2008	Female	2022-08-02	12.3	Foulawa	[50,77]	1	secondary	married	unemployed	peulh	notaccess	access	access	yes	yes	no	yes	(5,12]	0			-3.45221	Low SEP	14	negative
month4	7017	2010	Male	2022-08-01	12.9	Carrefour_Fodéyah	[50,77]	1	secondary	married	fonctionnaire	peulh	access	notaccess	notaccess	yes	yes	no	yes	[3,5]	0			-3.61857	Low SEP	12	negative
month4	7021	2009	Female	2022-08-01	11.2	Carrefour_Fodéyah	[35,50)	2	secondary	married	unemployed	peulh	notaccess	access	access	no	no	no	no	(5,12]	0			7.07663	High SEP	13	negative
month4	7024	2010	Male	2022-08-01	10.5	Foulawa	[50,77]	1	no_formal_education	married	agriculteur	peulh	notaccess	notaccess	notaccess	no	no	no	no	(5,12]	0			7.07701	High SEP	12	negative
month4	7025	2008	Male	2022-08-01	10.3	Foulawa	[50,77]	1	no_formal_education	married	agriculteur	peulh	notaccess	notaccess	notaccess	no	no	no	no	(5,12]	0			7.07713	High SEP	14	negative
month4	7034	2011	Female	2022-08-02	12.8	Foulawa	[22,35)	2	secondary	married	fonctionnaire	peulh	notaccess	access	access	yes	yes	no	no	[3,5]	0			-0.377134	Middle SEP	11	negative
month4	7048	2008	Female	2022-08-12	11.4	Layah	[50,77]	2	secondary	married	agriculteur	soussou	notaccess	access	notaccess	yes	yes	yes	yes	(12,35]	0			-1.22226	Middle SEP	14	negative
month4	7049	2011	Male	2022-08-12	12.3	Layah	[50,77]	2	secondary	married	agriculteur	soussou	notaccess	access	notaccess	yes	yes	yes	yes	(12,35]	0			-1.22214	Middle SEP	11	negative
month4	7052	2010	Female	2022-08-16	14.6	Layah	[50,77]	2	no_formal_education	married	unemployed	soussou	notaccess	access	access	no	no	no	yes	(5,12]	0			-2.885	Low SEP	12	negative
month4	7056	2012	Male	2022-08-12	11.8	Carrefour_Fodéyah	[35,50)	1	primary	married	unemployed	soussou	access	access	access	no	no	no	no	(5,12]	0			7.081	High SEP	10	negative
month4	7057	2012	Female	2022-08-12	13	Carrefour_Fodéyah	[35,50)	1	primary	married	unemployed	soussou	access	access	access	no	no	no	no	(5,12]	0			7.08112	High SEP	10	negative
month4	7061	2010	Male	2022-08-12	12	Carrefour_Fodéyah	[35,50)	1	primary	married	unemployed	soussou	access	access	access	no	no	no	no	(5,12]	0			7.08162	High SEP	12	negative
month4	7064	2008	Male	2022-08-11	12.8	Layah	[35,50)	2	secondary	married	unemployed	soussou	access	access	access	no	no	no	yes	[3,5]	0			-2.08031	Middle SEP	14	negative
month4	7065	2011	Female	2022-08-11	11.3	Layah	[35,50)	2	secondary	married	unemployed	soussou	access	access	access	no	no	no	yes	[3,5]	0			-2.08019	Middle SEP	11	negative
month4	7070	2011	Male	2022-08-16	13.1	Layah	[35,50)	2	no_formal_education	married	unemployed	soussou	notaccess	notaccess	notaccess	no	no	no	yes	(5,12]	0			-2.01029	Middle SEP	11	negative
month4	7071	2010	Male	2022-08-16	12.4	Layah	[35,50)	2	no_formal_education	married	unemployed	soussou	notaccess	notaccess	notaccess	no	no	no	yes	(5,12]	0			-2.01016	Middle SEP	12	negative
month4	7081	2010	Male	2022-08-11	11.6	Layah	[35,50)	2	no_formal_education	married	unemployed	soussou	access	access	notaccess	yes	yes	no	no	(5,12]	0			0.643027	High SEP	12	negative
month4	7087	2008	Female	2022-08-03	11.3	Loumafori	[35,50)	2	secondary	married	unemployed	autres	notaccess	access	notaccess	yes	yes	no	no	[3,5]	0			-0.130631	High SEP	14	negative
month4	7098	2010	Male	2022-08-03	13.1	Olympio	[22,35)	2	primary	married	unemployed	autres	access	access	access	yes	yes	no	yes	(5,12]	0			-0.391305	Middle SEP	12	negative
month4	7108	2010	Male	2022-08-03	13.2	Olympio	[35,50)	2	secondary	married	commerçant	peulh	notaccess	access	notaccess	yes	yes	no	no	(5,12]	0			-1.12838	Middle SEP	12	negative
month4	7112	2009	Female	2022-08-03	12.4	Olympio	[22,35)	2	primary	married	unemployed	peulh	notaccess	access	access	yes	yes	no	yes	[3,5]	0			-2.22735	Low SEP	13	negative
month4	7113	2010	Female	2022-08-03	9.4	Olympio	[22,35)	2	primary	married	unemployed	peulh	notaccess	access	access	yes	yes	no	yes	[3,5]	0			-2.22723	Low SEP	12	negative
month4	7116	2010	Male	2022-08-03	14.8	Olympio	[35,50)	2	no_formal_education	married	commerçant	peulh	notaccess	notaccess	notaccess	yes	no	no	yes	(5,12]	0			-2.94599	Low SEP	12	negative
month4	7117	2012	Female	2022-08-03	13.3	Olympio	[35,50)	2	no_formal_education	married	commerçant	peulh	notaccess	notaccess	notaccess	yes	no	no	yes	(5,12]	0			-2.94586	Low SEP	10	negative
month4	7131	2012	Female	2022-08-16	12.7	Loumafori	[50,77]	1	secondary	married	unemployed	soussou	notaccess	notaccess	notaccess	yes	yes	no	yes	(5,12]	0			0.331091	High SEP	10	negative
month4	7133	2010	Male	2022-08-17	14	Hafia	[22,35)	2	secondary	married	unemployed	autres	notaccess	access	access	yes	yes	no	yes	(5,12]	0			-2.60487	Low SEP	12	negative
month4	7136	2009	Female	2022-08-17	12.2	Hafia	[22,35)	2	secondary	married	unemployed	autres	notaccess	access	access	yes	yes	no	yes	(5,12]	0			-2.6045	Low SEP	13	negative
month4	7141	2009	Male	2022-08-16	11.7	Loumafori	[50,77]	1	no_formal_education	married	agriculteur	soussou	access	access	notaccess	yes	yes	no	yes	(5,12]	0			-2.92113	Low SEP	13	negative
month4	7154	2010	Male	2022-08-16	13.9	Loumafori	[50,77]	1	secondary	married	unemployed	peulh	access	access	notaccess	yes	yes	no	yes	(12,35]	0			-3.47293	Low SEP	12	negative
month4	7162	2012	Female	2022-08-17	13.7	Hafia	[22,35)	2	secondary	married	fonctionnaire	peulh	notaccess	notaccess	notaccess	no	no	no	no	(5,12]	0			-1.86632	Middle SEP	10	negative
month4	7179	2009	Female	2022-08-10	14	Layah	[50,77]	2	no_formal_education	married	unemployed	soussou	notaccess	access	access	no	no	no	no	(5,12]	0			7.09634	High SEP	13	negative
month4	7180	2010	Female	2022-08-10	11.7	Layah	[50,77]	2	no_formal_education	married	unemployed	soussou	notaccess	access	access	no	no	no	no	(5,12]	0			7.09646	High SEP	12	negative
month4	7181	2010	Male	2022-08-10	13	Carrefour_Fodéyah	[50,77]	2	secondary	single	unemployed	peulh	access	access	access	yes	yes	no	yes	(5,12]	480	0	Pf	-2.78035	Low SEP	12	positive
month4	7187	2010	Male	2022-08-10	13	Carrefour_Fodéyah	[22,35)	1	secondary	married	unemployed	soussou	notaccess	access	access	no	no	no	no	(5,12]	0			7.09734	High SEP	12	negative
month4	7194	2009	Female	2022-08-10	10.9	Carrefour_Fodéyah	[35,50)	1	primary	married	unemployed	soussou	access	access	access	no	no	no	yes	(12,35]	0			-0.226089	High SEP	13	negative
month4	7195	2009	Female	2022-08-10	12.2	Carrefour_Fodéyah	[35,50)	1	primary	married	unemployed	soussou	access	access	access	no	no	no	yes	(12,35]	0			-0.225965	High SEP	13	negative
month4	7196	2011	Male	2022-08-10	16.3	Carrefour_Fodéyah	[35,50)	1	secondary	married	unemployed	autres	access	access	access	yes	yes	no	yes	(12,35]	0			-2.39061	Low SEP	11	negative
month4	7199	2009	Male	2022-08-10	9.7	Carrefour_Fodéyah	[35,50)	1	secondary	married	unemployed	autres	access	access	access	yes	yes	no	yes	(12,35]	1000	0	PF	-2.39023	Low SEP	13	positive
month4	7200	2011	Male	2022-08-11	16	Foulawa	[50,77]	1	secondary	married	fonctionnaire	peulh	access	access	notaccess	yes	yes	no	yes	[3,5]	0			-2.40842	Low SEP	11	negative
month4	7202	2011	Male	2022-08-11	12.4	Foulawa	[50,77]	1	secondary	married	fonctionnaire	peulh	access	access	notaccess	yes	yes	no	yes	[3,5]	0			-2.40817	Low SEP	11	negative
month4	7207	2008	Female	2022-08-05	14.2	Carrefour_Fodéyah	[22,35)	2	secondary	married	unemployed	soussou	notaccess	access	access	no	no	no	yes	[3,5]	0			-2.26994	Low SEP	14	negative
month4	7215	2009	Male	2022-08-04	8.9	Olympio	[50,77]	1	secondary	married	agriculteur	soussou	access	access	notaccess	yes	yes	no	no	(12,35]	0			-1.31464	Middle SEP	13	negative
month4	7216	2012	Female	2022-08-04	13.4	Olympio	[50,77]	1	secondary	married	agriculteur	soussou	access	access	notaccess	yes	yes	no	no	(12,35]	0			-1.31451	Middle SEP	10	negative
month4	7217	2012	Male	2022-08-04	12.3	Olympio	[50,77]	1	secondary	married	agriculteur	soussou	access	access	notaccess	yes	yes	no	no	(12,35]	0			-1.31439	Middle SEP	10	negative
month4	7224	2010	Male	2022-08-06	13.4	Carrefour_Fodéyah	[22,35)	2	primary	married	unemployed	soussou	access	access	notaccess	no	no	no	no	(5,12]	0			7.10195	High SEP	12	negative
month4	7225	2012	Male	2022-08-06	8.8	Carrefour_Fodéyah	[22,35)	2	primary	married	unemployed	soussou	access	access	notaccess	no	no	no	no	(5,12]	0			7.10208	High SEP	10	negative
month4	7235	2009	Male	2022-08-04	15.9	Tanene	[22,35)	2	no_formal_education	married	commerçant	soussou	notaccess	access	notaccess	yes	yes	no	no	(12,35]	0			-2.11056	Middle SEP	13	negative
month4	7241	2011	Female	2022-08-19	11.5	Foulawa	[35,50)	2	no_formal_education	married	commerçant	peulh	notaccess	access	notaccess	no	no	no	no	(5,12]	0			7.10407	High SEP	11	negative
month4	7260	2009	Female	2022-08-02	10.6	Kimara	[22,35)	1	secondary	married	fonctionnaire	autres	notaccess	notaccess	notaccess	yes	yes	no	yes	(5,12]	0			-3.12052	Low SEP	13	negative
month4	7265	2009	Female	2022-08-01	11.8	Kimara	[35,50)	2	primary	married	unemployed	autres	access	access	access	yes	yes	no	yes	[3,5]	0			-3.13482	Low SEP	13	negative
month4	7266	2009	Female	2022-08-01	14.6	Kimara	[35,50)	1	primary	married	unemployed	autres	notaccess	access	notaccess	yes	yes	no	yes	[3,5]	0			0.0283716	High SEP	13	negative
month4	7273	2009	Male	2022-08-01	10.4	Kimara	[50,77]	2	primary	single	commerçant	autres	access	access	notaccess	yes	yes	no	yes	(5,12]	768	0	Pf	0.569268	High SEP	13	positive
month4	7274	2009	Male	2022-08-09	9.5	Sarata	[35,50)	2	secondary	single	commerçant	soussou	notaccess	notaccess	notaccess	yes	no	no	yes	(5,12]	0			-0.0685308	High SEP	13	negative
month4	7277	2010	Female	2022-08-09	9.8	Sarata	[35,50)	2	secondary	single	commerçant	soussou	notaccess	notaccess	notaccess	yes	no	no	yes	(5,12]	0			-0.0681566	High SEP	12	negative
month4	7292	2010	Female	2022-08-09	12.6	Sarata	[50,77]	1	secondary	married	agriculteur	soussou	access	access	notaccess	no	no	no	yes	(5,12]	0			-0.242698	Middle SEP	12	negative
month4	7298	2010	Male	2022-08-05	11.2	Tanene	[22,35)	2	no_formal_education	married	commerçant	soussou	notaccess	access	notaccess	no	no	no	no	(5,12]	0			7.11118	High SEP	12	negative
month4	7323	2009	Male	2022-08-12	13	Layah	[35,50)	2	no_formal_education	married	commerçant	soussou	notaccess	notaccess	notaccess	yes	yes	no	yes	[3,5]	123	0	Pf	-0.669131	Middle SEP	13	positive
month4	7324	2011	Female	2022-08-12	11.6	Layah	[35,50)	2	no_formal_education	married	commerçant	soussou	notaccess	notaccess	notaccess	yes	yes	no	yes	[3,5]	0			-0.669006	Middle SEP	11	negative
month4	7338	2010	Female	2022-08-08	11	Maire_daouda	[22,35)	2	secondary	married	unemployed	soussou	access	access	access	yes	yes	no	yes	(5,12]	0			-2.21693	Low SEP	12	negative
month4	7347	2010	Female	2022-08-11	13.7	Layah	[35,50)	2	no_formal_education	married	commerçant	soussou	notaccess	notaccess	notaccess	no	no	no	no	(5,12]	0			7.1173	High SEP	12	negative
month4	7359	2008	Male	2022-08-16	9.9	Layah	[22,35)	2	secondary	married	unemployed	soussou	notaccess	access	access	no	no	no	no	(5,12]	0			-3.28043	Low SEP	14	negative
month4	7372	2012	Female	2022-08-17	14.1	Hafia	[35,50)	2	no_formal_education	married	commerçant	peulh	access	access	access	no	no	no	no	(5,12]	0			-3.2721	Low SEP	10	negative
month4	7374	2010	Female	2022-08-17	11.2	Hafia	[35,50)	2	no_formal_education	married	commerçant	peulh	access	access	access	no	no	no	no	(5,12]	0			-3.27185	Low SEP	12	negative
month4	7383	2009	Female	2022-08-19	11	Hafia	[50,77]	2	no_formal_education	single	commerçant	autres	notaccess	notaccess	notaccess	yes	yes	no	no	(5,12]	0			-0.716141	Middle SEP	13	negative
month4	7391	2008	Male	2022-08-16	14.3	Loumafori	[50,77]	1	no_formal_education	married	unemployed	peulh	notaccess	access	notaccess	yes	yes	no	no	(12,35]	0			-3.06527	Low SEP	14	negative
month4	7053		Male		14	Layah	[35,50)	2	no_formal_education	married	unemployed	soussou	access	access	access	no	no	no	no	(5,12]	331	0	Pf	-2.88488	Low SEP	11	positive
month5	7005	2011	Male	2022-09-05	12.1	Foulawa	[35,50)	1	secondary	married	commerçant	peulh	access	access	notaccess	yes	yes	no	yes	(5,12]	0			-1.44814	Middle SEP	11	negative
month5	7007	2010	Male	2022-09-05	14.6	Foulawa	[35,50)	1	secondary	married	commerçant	peulh	access	access	notaccess	yes	yes	no	yes	(5,12]	0			-1.44789	Middle SEP	12	negative
month5	7015	2009	Female	2022-09-05	9.2	Foulawa	[50,77]	1	no_formal_education	married	unemployed	peulh	access	access	notaccess	no	no	no	yes	(5,12]	0			-0.419928	Middle SEP	13	negative
month5	7021	2009	Female	2022-09-05	12.7	Carrefour_Fodéyah	[35,50)	2	secondary	married	unemployed	peulh	notaccess	access	access	no	no	no	no	(5,12]	0			7.07663	High SEP	13	negative
month5	7023	2009	Male	2022-09-05	17.4	Foulawa	[35,50)	1	secondary	married	fonctionnaire	peulh	notaccess	access	access	yes	no	no	no	(5,12]	0			0.0823459	High SEP	13	negative
month5	7024	2012	Male	2022-09-05	9.9	Foulawa	[50,77]	1	no_formal_education	married	agriculteur	peulh	notaccess	notaccess	notaccess	no	no	no	no	(5,12]	0			7.07701	High SEP	10	negative
month5	7025	2009	Male	2022-09-05	11.3	Foulawa	[50,77]	1	no_formal_education	married	agriculteur	peulh	notaccess	notaccess	notaccess	no	no	no	no	(5,12]	0			7.07713	High SEP	13	negative
month5	7028	2009	Female	2022-09-06	10.6	Foulawa	[50,77]	1	secondary	married	fonctionnaire	peulh	access	access	access	no	no	no	no	(5,12]	0			-4.27079	Low SEP	13	negative
month5	7033	2009	Female	2022-09-05	11.6	Foulawa	[22,35)	2	secondary	married	fonctionnaire	peulh	notaccess	access	access	yes	yes	no	no	[3,5]	0			-0.377258	Middle SEP	13	negative
month5	7036	2010	Female	2022-09-05	10.2	Hafia	[22,35)	2	secondary	married	commerçant	peulh	notaccess	notaccess	access	yes	yes	no	yes	[3,5]	0			-2.2457	Low SEP	12	negative
month5	7041	2009	Female	2022-09-07	13.5	Foulawa	[50,77]	1	secondary	married	fonctionnaire	peulh	access	access	access	no	no	no	no	(5,12]	0			-4.26917	Low SEP	13	negative
month5	7043	2009	Male	2022-09-12	14.7	Layah	[22,35)	2	secondary	single	unemployed	soussou	access	access	access	yes	yes	no	yes	(5,12]	0			0.872961	High SEP	13	negative
month5	7048	2008	Female	2022-09-19	11.7	Layah	[50,77]	2	secondary	married	agriculteur	soussou	notaccess	access	notaccess	yes	yes	yes	yes	(12,35]	3168	0	Pf	-1.22226	Middle SEP	14	positive
month5	7049	2011	Male	2022-09-19	10.9	Layah	[50,77]	2	secondary	married	agriculteur	soussou	notaccess	access	notaccess	yes	yes	yes	yes	(12,35]	0			-1.22214	Middle SEP	11	negative
month5	7052	2010	Female	2022-09-12	14.5	Layah	[50,77]	2	no_formal_education	married	unemployed	soussou	notaccess	access	access	no	no	no	yes	(5,12]	0			-2.885	Low SEP	12	negative
month5	7056	2012	Male	2022-09-19	11.4	Carrefour_Fodéyah	[35,50)	1	primary	married	unemployed	soussou	access	access	access	no	no	no	no	(5,12]	0			7.081	High SEP	10	negative
month5	7057	2012	Female	2022-09-19	11.2	Carrefour_Fodéyah	[35,50)	1	primary	married	unemployed	soussou	access	access	access	no	no	no	no	(5,12]	0			7.08112	High SEP	10	negative
month5	7061	2010	Male	2022-09-19	10.7	Carrefour_Fodéyah	[35,50)	1	primary	married	unemployed	soussou	access	access	access	no	no	no	no	(5,12]	0			7.08162	High SEP	12	negative
month5	7064	2008	Male	2022-09-12	10.9	Layah	[35,50)	2	secondary	married	unemployed	soussou	access	access	access	no	no	no	yes	[3,5]	0			-2.08031	Middle SEP	14	negative
month5	7065	2011	Female	2022-09-12	13.4	Layah	[35,50)	2	secondary	married	unemployed	soussou	access	access	access	no	no	no	yes	[3,5]	0			-2.08019	Middle SEP	11	negative
month5	7070	2011	Male	2022-09-14	10.3	Layah	[35,50)	2	no_formal_education	married	unemployed	soussou	notaccess	notaccess	notaccess	no	no	no	yes	(5,12]	120	0	Pf	-2.01029	Middle SEP	11	positive
month5	7071	2010	Male	2022-09-14	11.2	Layah	[35,50)	2	no_formal_education	married	unemployed	soussou	notaccess	notaccess	notaccess	no	no	no	yes	(5,12]	0			-2.01016	Middle SEP	12	negative
month5	7081	2010	Male	2022-09-12	13.2	Layah	[35,50)	2	no_formal_education	married	unemployed	soussou	access	access	notaccess	yes	yes	no	no	(5,12]	0			0.643027	High SEP	12	negative
month5	7087	2008	Female	2022-09-07	10.9	Loumafori	[35,50)	2	secondary	married	unemployed	autres	notaccess	access	notaccess	yes	yes	no	no	[3,5]	0			-0.130631	High SEP	14	negative
month5	7098	2010	Male	2022-09-07	11.7	Olympio	[22,35)	2	primary	married	unemployed	autres	access	access	access	yes	yes	no	yes	(5,12]	0			-0.391305	Middle SEP	12	negative
month5	7108	2010	Male	2022-09-07	12.8	Olympio	[35,50)	2	secondary	married	commerçant	peulh	notaccess	access	notaccess	yes	yes	no	no	(5,12]	0			-1.12838	Middle SEP	12	negative
month5	7112	2009	Female	2022-09-07	9.9	Olympio	[22,35)	2	primary	married	unemployed	peulh	notaccess	access	access	yes	yes	no	yes	[3,5]	0			-2.22735	Low SEP	13	negative
month5	7113	2010	Female	2022-09-07	10.6	Olympio	[22,35)	2	primary	married	unemployed	peulh	notaccess	access	access	yes	yes	no	yes	[3,5]	0			-2.22723	Low SEP	12	negative
month5	7116	2010	Male	2022-09-07	12.1	Olympio	[35,50)	2	no_formal_education	married	commerçant	peulh	notaccess	notaccess	notaccess	yes	no	no	yes	(5,12]	0			-2.94599	Low SEP	12	negative
month5	7117	2012	Female	2022-09-07	13.6	Olympio	[35,50)	2	no_formal_education	married	commerçant	peulh	notaccess	notaccess	notaccess	yes	no	no	yes	(5,12]	0			-2.94586	Low SEP	10	negative
month5	7131	2012	Female	2022-09-13	11.2	Loumafori	[50,77]	1	secondary	married	unemployed	soussou	notaccess	notaccess	notaccess	yes	yes	no	yes	(5,12]	0			0.331091	High SEP	10	negative
month5	7133	2010	Male	2022-09-21	13.8	Hafia	[22,35)	2	secondary	married	unemployed	autres	notaccess	access	access	yes	yes	no	yes	(5,12]	0			-2.60487	Low SEP	12	negative
month5	7136	2009	Female	2022-09-21	12.8	Hafia	[22,35)	2	secondary	married	unemployed	autres	notaccess	access	access	yes	yes	no	yes	(5,12]	0			-2.6045	Low SEP	13	negative
month5	7141	2009	Male	2022-09-13	12	Loumafori	[50,77]	1	no_formal_education	married	agriculteur	soussou	access	access	notaccess	yes	yes	no	yes	(5,12]	0			-2.92113	Low SEP	13	negative
month5	7154	2010	Male	2022-09-14	13.1	Loumafori	[50,77]	1	secondary	married	unemployed	peulh	access	access	notaccess	yes	yes	no	yes	(12,35]	0			-3.47293	Low SEP	12	negative
month5	7162	2012	Female	2022-09-22	10.5	Hafia	[22,35)	2	secondary	married	fonctionnaire	peulh	notaccess	notaccess	notaccess	no	no	no	no	(5,12]	0			-1.86632	Middle SEP	10	negative
month5	7179	2009	Female	2022-09-22	12.3	Layah	[50,77]	2	no_formal_education	married	unemployed	soussou	notaccess	access	access	no	no	no	no	(5,12]	4271	0	Pf	7.09634	High SEP	13	positive
month5	7180	2010	Female	2022-09-22	12.3	Layah	[50,77]	2	no_formal_education	married	unemployed	soussou	notaccess	access	access	no	no	no	no	(5,12]	0			7.09646	High SEP	12	negative
month5	7181	2010	Male	2022-09-22	14.3	Carrefour_Fodéyah	[50,77]	2	secondary	single	unemployed	peulh	access	access	access	yes	yes	no	yes	(5,12]	1380	0	Pf	-2.78035	Low SEP	12	positive
month5	7187	2010	Male	2022-09-22	11.9	Carrefour_Fodéyah	[22,35)	1	secondary	married	unemployed	soussou	notaccess	access	access	no	no	no	no	(5,12]	0			7.09734	High SEP	12	negative
month5	7194	2009	Female	2022-09-22	11.6	Carrefour_Fodéyah	[35,50)	1	primary	married	unemployed	soussou	access	access	access	no	no	no	yes	(12,35]	0			-0.226089	High SEP	13	negative
month5	7195	2009	Female	2022-09-22	10.9	Carrefour_Fodéyah	[35,50)	1	primary	married	unemployed	soussou	access	access	access	no	no	no	yes	(12,35]	0			-0.225965	High SEP	13	negative
month5	7196	2011	Male	2022-09-22	14.7	Carrefour_Fodéyah	[35,50)	1	secondary	married	unemployed	autres	access	access	access	yes	yes	no	yes	(12,35]	0			-2.39061	Low SEP	11	negative
month5	7199	2009	Male	2022-09-22	9	Carrefour_Fodéyah	[35,50)	1	secondary	married	unemployed	autres	access	access	access	yes	yes	no	yes	(12,35]	0			-2.39023	Low SEP	13	negative
month5	7200	2011	Male	2022-09-22	15.3	Foulawa	[50,77]	1	secondary	married	fonctionnaire	peulh	access	access	notaccess	yes	yes	no	yes	[3,5]	0			-2.40842	Low SEP	11	negative
month5	7202	2011	Male	2022-09-22	12.7	Foulawa	[50,77]	1	secondary	married	fonctionnaire	peulh	access	access	notaccess	yes	yes	no	yes	[3,5]	0			-2.40817	Low SEP	11	negative
month5	7207	2008	Female	2022-09-22	11.7	Carrefour_Fodéyah	[22,35)	2	secondary	married	unemployed	soussou	notaccess	access	access	no	no	no	yes	[3,5]	0			-2.26994	Low SEP	14	negative
month5	7215	2009	Male	2022-09-07	13.9	Olympio	[50,77]	1	secondary	married	agriculteur	soussou	access	access	notaccess	yes	yes	no	no	(12,35]	0			-1.31464	Middle SEP	13	negative
month5	7216	2012	Female	2022-09-07	12.4	Olympio	[50,77]	1	secondary	married	agriculteur	soussou	access	access	notaccess	yes	yes	no	no	(12,35]	0			-1.31451	Middle SEP	10	negative
month5	7217	2012	Male	2022-09-07	12.3	Olympio	[50,77]	1	secondary	married	agriculteur	soussou	access	access	notaccess	yes	yes	no	no	(12,35]	0			-1.31439	Middle SEP	10	negative
month5	7224	2010	Male	2022-09-07	12.3	Carrefour_Fodéyah	[22,35)	2	primary	married	unemployed	soussou	access	access	notaccess	no	no	no	no	(5,12]	0			7.10195	High SEP	12	negative
month5	7225	2012	Male	2022-09-07	10.44	Carrefour_Fodéyah	[22,35)	2	primary	married	unemployed	soussou	access	access	notaccess	no	no	no	no	(5,12]	0			7.10208	High SEP	10	negative
month5	7235	2009	Male	2022-09-07	17.3	Tanene	[22,35)	2	no_formal_education	married	commerçant	soussou	notaccess	access	notaccess	yes	yes	no	no	(12,35]	0			-2.11056	Middle SEP	13	negative
month5	7241	2011	Female	2022-09-07	13.4	Carrefour_Fodéyah	[35,50)	1	secondary	married	fonctionnaire	peulh	notaccess	notaccess	notaccess	no	no	no	no	(5,12]	0			7.10407	High SEP	11	negative
month5	7260	2009	Female	2022-09-05	8.9	Kimara	[22,35)	1	secondary	married	fonctionnaire	autres	notaccess	notaccess	notaccess	yes	yes	no	yes	(5,12]	0			-3.12052	Low SEP	13	negative
month5	7265	2009	Female	2022-09-05	11.3	Kimara	[35,50)	2	primary	married	unemployed	autres	access	access	access	yes	yes	no	yes	[3,5]	0			-3.13482	Low SEP	13	negative
month5	7266	2009	Female	2022-09-05	13.7	Kimara	[35,50)	1	primary	married	unemployed	autres	notaccess	access	notaccess	yes	yes	no	yes	[3,5]	0			0.0283716	High SEP	13	negative
month5	7273	2009	Male	2022-09-07	11.6	Kimara	[50,77]	2	primary	single	commerçant	autres	access	access	notaccess	yes	yes	no	yes	(5,12]	0			0.569268	High SEP	13	negative
month5	7274	2009	Male	2022-09-13	12.1	Sarata	[35,50)	2	secondary	single	commerçant	soussou	notaccess	notaccess	notaccess	yes	no	no	yes	(5,12]	0			-0.0685308	High SEP	13	negative
month5	7275	2012	Male	2022-09-13	13.8	Sarata	[35,50)	2	secondary	single	commerçant	soussou	notaccess	notaccess	notaccess	yes	no	no	yes	(5,12]	1288	0	Pf	-0.0684061	High SEP	10	positive
month5	7277	2010	Female	2022-09-13	10.8	Sarata	[35,50)	2	secondary	single	commerçant	soussou	notaccess	notaccess	notaccess	yes	no	no	yes	(5,12]	0			-0.0681566	High SEP	12	negative
month5	7298	2010	Male	2022-09-09	10	Tanene	[22,35)	2	no_formal_education	married	commerçant	soussou	notaccess	access	notaccess	no	no	no	no	(5,12]	0			7.11118	High SEP	12	negative
month5	7323	2009	Male	2022-09-12	14.3	Layah	[35,50)	2	no_formal_education	married	commerçant	soussou	notaccess	notaccess	notaccess	yes	yes	no	yes	[3,5]	298	0	Pf + Gf	-0.669131	Middle SEP	13	positive
month5	7324	2011	Female	2022-09-12	10.6	Layah	[35,50)	2	no_formal_education	married	commerçant	soussou	notaccess	notaccess	notaccess	yes	yes	no	yes	[3,5]	6324	0	Pf	-0.669006	Middle SEP	11	positive
month5	7338	2010	Female	2022-09-09	10.4	Maire_daouda	[22,35)	2	secondary	married	unemployed	soussou	access	access	access	yes	yes	no	yes	(5,12]	0			-2.21693	Low SEP	12	negative
month5	7344	2010	Female	2022-09-27	12.9	Layah	[35,50)	2	no_formal_education	married	commerçant	soussou	notaccess	notaccess	notaccess	yes	yes	no	yes	[3,5]	0			-0.666511	Middle SEP	12	negative
month5	7347	2010	Female	2022-09-12	11.7	Layah	[35,50)	2	no_formal_education	married	commerçant	soussou	notaccess	notaccess	notaccess	no	no	no	no	(5,12]	0			7.1173	High SEP	12	negative
month5	7359	2008	Male	2022-09-14	9.5	Layah	[22,35)	2	secondary	married	unemployed	soussou	notaccess	access	access	no	no	no	no	(5,12]	0			-3.28043	Low SEP	14	negative
month5	7372	2012	Female	2022-09-20	11.7	Hafia	[35,50)	2	no_formal_education	married	commerçant	peulh	access	access	access	no	no	no	no	(5,12]	0			-3.2721	Low SEP	10	negative
month5	7374	2010	Female	2022-09-20	10.4	Hafia	[35,50)	2	no_formal_education	married	commerçant	peulh	access	access	access	no	no	no	no	(5,12]	0			-3.27185	Low SEP	12	negative
month5	7378	2019	Female		12.1	Layah	[22,35)	2	primary	single	unemployed	soussou	access	access	access	no	no	no	yes	[3,5]	0			0.349948	High SEP	11	negative
month5	7383	2009	Female	2022-09-23	14.2	Hafia	[50,77]	2	no_formal_education	single	commerçant	autres	notaccess	notaccess	notaccess	yes	yes	no	no	(5,12]	0			-0.716141	Middle SEP	13	negative
month5	7391	2008	Male	2022-09-13	10.8	Loumafori	[50,77]	1	no_formal_education	married	unemployed	peulh	notaccess	access	notaccess	yes	yes	no	no	(12,35]	0			-3.06527	Low SEP	14	negative
month5	7356		Male		11.9	Layah	[35,50)	2	secondary	married	fonctionnaire	soussou	access	access	notaccess	no	no	no	no	(5,12]	512	0	Pf	-1.94947	Middle SEP	11	positive
month5	7393		Female		11.5	Kimara	[35,50)	2	primary	married	fonctionnaire	autres	access	access	notaccess	no	no	no	no	(5,12]	512	0	Pf	-3.06502	Low SEP	11	positive
month5	7169		Male		9.9	Layah	[35,50)	2	no_formal_education	married	unemployed	soussou	access	access	access	no	no	no	no	(5,12]	120	0	Pf	-1.72711	Middle SEP	11	positive
month5	7292		Female		12	Layah	[35,50)	2	secondary	married	unemployed	soussou	access	access	access	no	no	no	no	(5,12]	511	0	Pf	-0.242698	Middle SEP	11	positive
month5	7384		Male		13	Layah	[35,50)	2	no_formal_education	married	unemployed	soussou	access	access	notaccess	no	no	no	no	(5,12]	2823	0	Pf	-0.716017	Middle SEP	11	positive
month5	7289		Male		11.3	Carrefour_Fodéyah	[35,50)	2	secondary	married	fonctionnaire	peulh	access	access	access	no	no	no	no	(5,12]	768	0	Pf	-2.39661	Low SEP	11	positive
month5	7400		Female		12	Layah	[35,50)	2	secondary	single	unemployed	soussou	notaccess	access	access	no	no	no	no	(5,12]	2000	0	Pf	7.12391	High SEP	11	positive
month6	7006	2010	Female	2022-10-24	11.9	Foulawa	[35,50)	1	secondary	married	commerçant	peulh	access	access	notaccess	yes	yes	no	yes	(5,12]	0			-1.44802	Middle SEP	12	negative
month6	7008	2010	Male	2022-10-25	11.2	Foulawa	[50,77]	1	secondary	married	unemployed	peulh	notaccess	access	access	yes	yes	no	yes	(5,12]	0			-3.45246	Low SEP	12	negative
month6	7013	2010	Male	2022-10-24	10.6	Foulawa	[50,77]	1	no_formal_education	married	unemployed	peulh	access	access	notaccess	no	no	no	yes	(5,12]	0			-0.420177	Middle SEP	12	negative
month6	7017	2008	Male	2022-10-24	10.9	Carrefour_Fodéyah	[50,77]	1	secondary	married	fonctionnaire	peulh	access	notaccess	notaccess	yes	yes	no	yes	[3,5]	0			-3.61857	Low SEP	14	negative
month6	7021	2011	Male	2022-10-24	13	Carrefour_Fodéyah	[35,50)	2	secondary	married	unemployed	peulh	notaccess	access	access	no	no	no	no	(5,12]	0			7.07663	High SEP	11	negative
month6	7023	2012	Female	2022-10-24	15.2	Foulawa	[35,50)	1	secondary	married	fonctionnaire	peulh	notaccess	access	access	yes	no	no	no	(5,12]	0			0.0823459	High SEP	10	negative
month6	7028	2009	Female	2022-10-25	12.9	Foulawa	[50,77]	1	secondary	married	fonctionnaire	peulh	access	access	access	no	no	no	no	(5,12]	0			-4.27079	Low SEP	13	negative
month6	7029	2009	Male	2022-10-26	13.1	Carrefour_Fodéyah	[35,50)	2	secondary	married	unemployed	peulh	notaccess	access	access	no	no	no	yes	[3,5]	0			-4.49334	Low SEP	13	negative
month6	7031	2010	Female	2022-10-26	13.7	Carrefour_Fodéyah	[35,50)	2	secondary	married	unemployed	peulh	notaccess	access	access	no	no	no	yes	[3,5]	0			-4.49309	Low SEP	12	negative
month6	7033	2010	Male	2022-10-24	11.6	Foulawa	[22,35)	2	secondary	married	fonctionnaire	peulh	notaccess	access	access	yes	yes	no	no	[3,5]	0			-0.377258	Middle SEP	12	negative
month6	7043	2010	Female	2022-11-07	12.3	Layah	[22,35)	2	secondary	single	unemployed	soussou	access	access	access	yes	yes	no	yes	(5,12]	0			0.872961	High SEP	12	negative
month6	7048	2008	Female	2022-11-07	11.6	Layah	[50,77]	2	secondary	married	agriculteur	soussou	notaccess	access	notaccess	yes	yes	yes	yes	(12,35]	0			-1.22226	Middle SEP	14	negative
month6	7049	2011	Male	2022-11-07	13.8	Layah	[50,77]	2	secondary	married	agriculteur	soussou	notaccess	access	notaccess	yes	yes	yes	yes	(12,35]	0			-1.22214	Middle SEP	11	negative
month6	7052	2010	Female	2022-11-01	14.3	Layah	[50,77]	2	no_formal_education	married	unemployed	soussou	notaccess	access	access	no	no	no	yes	(5,12]	0			-2.885	Low SEP	12	negative
month6	7056	2012	Male	2022-11-07	10.1	Carrefour_Fodéyah	[35,50)	1	primary	married	unemployed	soussou	access	access	access	no	no	no	no	(5,12]	0			7.081	High SEP	10	negative
month6	7057	2012	Female	2022-11-07	10.5	Carrefour_Fodéyah	[35,50)	1	primary	married	unemployed	soussou	access	access	access	no	no	no	no	(5,12]	0			7.08112	High SEP	10	negative
month6	7061	2010	Male	2022-11-07	11.1	Carrefour_Fodéyah	[35,50)	1	primary	married	unemployed	soussou	access	access	access	no	no	no	no	(5,12]	0			7.08162	High SEP	12	negative
month6	7064	2008	Male	2022-11-07	12.7	Layah	[35,50)	2	secondary	married	unemployed	soussou	access	access	access	no	no	no	yes	[3,5]	0			-2.08031	Middle SEP	14	negative
month6	7065	2011	Female	2022-11-07	12.8	Layah	[35,50)	2	secondary	married	unemployed	soussou	access	access	access	no	no	no	yes	[3,5]	0			-2.08019	Middle SEP	11	negative
month6	7070	2011	Male	2022-11-10	11.1	Layah	[35,50)	2	no_formal_education	married	unemployed	soussou	notaccess	notaccess	notaccess	no	no	no	yes	(5,12]	0			-2.01029	Middle SEP	11	negative
month6	7071	2010	Male	2022-11-10	12	Layah	[35,50)	2	no_formal_education	married	unemployed	soussou	notaccess	notaccess	notaccess	no	no	no	yes	(5,12]	0			-2.01016	Middle SEP	12	negative
month6	7081	2010	Male	2022-11-07	12.6	Layah	[35,50)	2	no_formal_education	married	unemployed	soussou	access	access	notaccess	yes	yes	no	no	(5,12]	0			0.643027	High SEP	12	negative
month6	7087	2008	Female	2022-10-28	11.2	Loumafori	[35,50)	2	secondary	married	unemployed	autres	notaccess	access	notaccess	yes	yes	no	no	[3,5]	0			-0.130631	High SEP	14	negative
month6	7108	2010	Male	2022-10-28	13.7	Olympio	[35,50)	2	secondary	married	commerçant	peulh	notaccess	access	notaccess	yes	yes	no	no	(5,12]	0			-1.12838	Middle SEP	12	negative
month6	7112	2009	Female	2022-10-28	11.9	Olympio	[22,35)	2	primary	married	unemployed	peulh	notaccess	access	access	yes	yes	no	yes	[3,5]	0			-2.22735	Low SEP	13	negative
month6	7113	2010	Female	2022-10-28	13.2	Olympio	[22,35)	2	primary	married	unemployed	peulh	notaccess	access	access	yes	yes	no	yes	[3,5]	0			-2.22723	Low SEP	12	negative
month6	7116	2010	Male	2022-10-31	12.4	Olympio	[35,50)	2	no_formal_education	married	commerçant	peulh	notaccess	notaccess	notaccess	yes	no	no	yes	(5,12]	0			-2.94599	Low SEP	12	negative
month6	7117	2012	Female	2022-10-31	13.2	Olympio	[35,50)	2	no_formal_education	married	commerçant	peulh	notaccess	notaccess	notaccess	yes	no	no	yes	(5,12]	0			-2.94586	Low SEP	10	negative
month6	7131	2012	Female	2022-11-08	12	Loumafori	[50,77]	1	secondary	married	unemployed	soussou	notaccess	notaccess	notaccess	yes	yes	no	yes	(5,12]	0			0.331091	High SEP	10	negative
month6	7133	2010	Male	2022-11-10	14.4	Hafia	[22,35)	2	secondary	married	unemployed	autres	notaccess	access	access	yes	yes	no	yes	(5,12]	0			-2.60487	Low SEP	12	negative
month6	7136	2009	Female	2022-11-10	13.4	Hafia	[22,35)	2	secondary	married	unemployed	autres	notaccess	access	access	yes	yes	no	yes	(5,12]	0			-2.6045	Low SEP	13	negative
month6	7141	2009	Male	2022-11-09	12.3	Loumafori	[50,77]	1	no_formal_education	married	agriculteur	soussou	access	access	notaccess	yes	yes	no	yes	(5,12]	0			-2.92113	Low SEP	13	negative
month6	7154	2010	Male	2022-11-08	14.2	Loumafori	[50,77]	1	secondary	married	unemployed	peulh	access	access	notaccess	yes	yes	no	yes	(12,35]	0			-3.47293	Low SEP	12	negative
month6	7156	2008	Male	2022-11-08	16.1	Loumafori	[50,77]	1	secondary	married	unemployed	peulh	access	access	notaccess	yes	yes	no	yes	(12,35]	0			-3.47268	Low SEP	14	negative
month6	7162	2012	Female	2022-11-10	14.5	Hafia	[22,35)	2	secondary	married	fonctionnaire	peulh	notaccess	notaccess	notaccess	no	no	no	no	(5,12]	0			-1.86632	Middle SEP	10	negative
month6	7179	2009	Female	2022-11-11	13.9	Layah	[50,77]	2	no_formal_education	married	unemployed	soussou	notaccess	access	access	no	no	no	no	(5,12]	0			7.09634	High SEP	13	negative
month6	7180	2010	Female	2022-11-11	12	Layah	[50,77]	2	no_formal_education	married	unemployed	soussou	notaccess	access	access	no	no	no	no	(5,12]	0			7.09646	High SEP	12	negative
month6	7181	2010	Male	2022-11-14	12.4	Carrefour_Fodéyah	[50,77]	2	secondary	single	unemployed	peulh	access	access	access	yes	yes	no	yes	(5,12]	0			-2.78035	Low SEP	12	negative
month6	7187	2010	Male	2022-11-11	11.1	Carrefour_Fodéyah	[22,35)	1	secondary	married	unemployed	soussou	notaccess	access	access	no	no	no	no	(5,12]	0			7.09734	High SEP	12	negative
month6	7194	2009	Female	2022-11-17	12.7	Carrefour_Fodéyah	[35,50)	1	primary	married	unemployed	soussou	access	access	access	no	no	no	yes	(12,35]	0			-0.226089	High SEP	13	negative
month6	7195	2009	Female	2022-11-17	13.8	Carrefour_Fodéyah	[35,50)	1	primary	married	unemployed	soussou	access	access	access	no	no	no	yes	(12,35]	0			-0.225965	High SEP	13	negative
month6	7196	2011	Male	2022-11-11	14.8	Carrefour_Fodéyah	[35,50)	1	secondary	married	unemployed	autres	access	access	access	yes	yes	no	yes	(12,35]	720	0	Pf	-2.39061	Low SEP	11	positive
month6	7199	2009	Male	2022-11-11	9.2	Carrefour_Fodéyah	[35,50)	1	secondary	married	unemployed	autres	access	access	access	yes	yes	no	yes	(12,35]	0			-2.39023	Low SEP	13	negative
month6	7200	2011	Male	2022-11-11	15	Foulawa	[50,77]	1	secondary	married	fonctionnaire	peulh	access	access	notaccess	yes	yes	no	yes	[3,5]	0			-2.40842	Low SEP	11	negative
month6	7202	2011	Male	2022-11-11	13.5	Foulawa	[50,77]	1	secondary	married	fonctionnaire	peulh	access	access	notaccess	yes	yes	no	yes	[3,5]	0			-2.40817	Low SEP	11	negative
month6	7207	2008	Female	2022-11-15	12.5	Carrefour_Fodéyah	[22,35)	2	secondary	married	unemployed	soussou	notaccess	access	access	no	no	no	yes	[3,5]	0			-2.26994	Low SEP	14	negative
month6	7215	2009	Male	2022-11-01	11.5	Olympio	[50,77]	1	secondary	married	agriculteur	soussou	access	access	notaccess	yes	yes	no	no	(12,35]	0			-1.31464	Middle SEP	13	negative
month6	7216	2012	Female	2022-11-01	12.6	Olympio	[50,77]	1	secondary	married	agriculteur	soussou	access	access	notaccess	yes	yes	no	no	(12,35]	0			-1.31451	Middle SEP	10	negative
month6	7217	2012	Male	2022-11-01	11.4	Olympio	[50,77]	1	secondary	married	agriculteur	soussou	access	access	notaccess	yes	yes	no	no	(12,35]	0			-1.31439	Middle SEP	10	negative
month6	7224	2010	Male	2022-11-01	10	Carrefour_Fodéyah	[22,35)	2	primary	married	unemployed	soussou	access	access	notaccess	no	no	no	no	(5,12]	0			7.10195	High SEP	12	negative
month6	7225	2012	Male	2022-11-01	11.7	Carrefour_Fodéyah	[22,35)	2	primary	married	unemployed	soussou	access	access	notaccess	no	no	no	no	(5,12]	0			7.10208	High SEP	10	negative
month6	7234	2008	Male	2022-10-26	12	Sarata	[22,35)	2	primary	married	unemployed	soussou	access	access	notaccess	no	no	no	no	(5,12]	0			7.1032	High SEP	14	negative
month6	7235	2009	Male	2022-10-31	12.1	Tanene	[22,35)	2	no_formal_education	married	commerçant	soussou	notaccess	access	notaccess	yes	yes	no	no	(12,35]	0			-2.11056	Middle SEP	13	negative
month6	7241	2011	Female	2022-10-31	13.6	Layah	[35,50)	2	no_formal_education	married	commerçant	soussou	notaccess	notaccess	notaccess	no	no	no	no	(5,12]	0			7.10407	High SEP	11	negative
month6	7265	2009	Female	2022-10-26	13.2	Kimara	[35,50)	2	primary	married	unemployed	autres	access	access	access	yes	yes	no	yes	[3,5]	0			-3.13482	Low SEP	13	negative
month6	7266	2009	Female	2022-10-27	14	Kimara	[35,50)	1	primary	married	unemployed	autres	notaccess	access	notaccess	yes	yes	no	yes	[3,5]	0			0.0283716	High SEP	13	negative
month6	7273	2009	Male	2022-10-26	11.8	Kimara	[50,77]	2	primary	single	commerçant	autres	access	access	notaccess	yes	yes	no	yes	(5,12]	0			0.569268	High SEP	13	negative
month6	7274	2009	Male	2022-11-03	11.3	Sarata	[35,50)	2	secondary	single	commerçant	soussou	notaccess	notaccess	notaccess	yes	no	no	yes	(5,12]	0			-0.0685308	High SEP	13	negative
month6	7275	2012	Male	2022-11-03	11.8	Sarata	[35,50)	2	secondary	single	commerçant	soussou	notaccess	notaccess	notaccess	yes	no	no	yes	(5,12]	0			-0.0684061	High SEP	10	negative
month6	7277	2010	Female	2022-11-03	9.7	Sarata	[35,50)	2	secondary	single	commerçant	soussou	notaccess	notaccess	notaccess	yes	no	no	yes	(5,12]	0			-0.0681566	High SEP	12	negative
month6	7292	2010	Female	2022-11-03	11.5	Sarata	[50,77]	1	secondary	married	agriculteur	soussou	access	access	notaccess	no	no	no	yes	(5,12]	0			-0.242698	Middle SEP	12	negative
month6	7298	2010	Male	2022-11-03	10	Tanene	[22,35)	2	no_formal_education	married	commerçant	soussou	notaccess	access	notaccess	no	no	no	no	(5,12]	0			7.11118	High SEP	12	negative
month6	7304	2010	Male	2022-11-03	14	Foulawa	[35,50)	1	secondary	married	fonctionnaire	peulh	notaccess	access	access	no	no	no	no	(5,12]	0			7.11193	High SEP	12	negative
month6	7323	2009	Male	2022-11-07	12.8	Layah	[35,50)	2	no_formal_education	married	commerçant	soussou	notaccess	notaccess	notaccess	yes	yes	no	yes	[3,5]	0			-0.669131	Middle SEP	13	negative
month6	7324	2011	Female	2022-11-03	10.9	Layah	[35,50)	2	no_formal_education	married	commerçant	soussou	notaccess	notaccess	notaccess	yes	yes	no	yes	[3,5]	0			-0.669006	Middle SEP	11	negative
month6	7338	2010	Female	2022-11-02	11.8	Maire_daouda	[22,35)	2	secondary	married	unemployed	soussou	access	access	access	yes	yes	no	yes	(5,12]	0			-2.21693	Low SEP	12	negative
month6	7344	2010	Female	2022-11-07	12.9	Layah	[35,50)	2	no_formal_education	married	commerçant	soussou	notaccess	notaccess	notaccess	yes	yes	no	yes	[3,5]	0			-0.666511	Middle SEP	12	negative
month6	7347	2010	Female	2022-11-07	12.6	Layah	[35,50)	2	no_formal_education	married	commerçant	soussou	notaccess	notaccess	notaccess	no	no	no	no	(5,12]	0			7.1173	High SEP	12	negative
month6	7359	2008	Male	2022-11-08	10.9	Layah	[22,35)	2	secondary	married	unemployed	soussou	notaccess	access	access	no	no	no	no	(5,12]	0			-3.28043	Low SEP	14	negative
month6	7372	2012	Female	2022-11-10	13.1	Hafia	[35,50)	2	no_formal_education	married	commerçant	peulh	access	access	access	no	no	no	no	(5,12]	1320	0	Pf	-3.2721	Low SEP	10	positive
month6	7374	2010	Female	2022-11-10	12.3	Hafia	[35,50)	2	no_formal_education	married	commerçant	peulh	access	access	access	no	no	no	no	(5,12]	3280	0	Pf	-3.27185	Low SEP	12	positive
month6	7383	2009	Female	2022-11-14	12.3	Hafia	[50,77]	2	no_formal_education	single	commerçant	autres	notaccess	notaccess	notaccess	yes	yes	no	no	(5,12]	0			-0.716141	Middle SEP	13	negative
month6	7391	2008	Male	2022-11-08	13.3	Loumafori	[50,77]	1	no_formal_education	married	unemployed	peulh	notaccess	access	notaccess	yes	yes	no	no	(12,35]	0			-3.06527	Low SEP	14	negative
month6	7393		Male		12.7	Layah	[35,50)	2	no_formal_education	married	unemployed	autres	notaccess	access	access	no	no	no	no	(5,12]	493	0	Pf	-3.06502	Low SEP	11	positive
month7	7002	2012	Male	2022-12-15	15.2	Carrefour_Fodéyah	[50,77]	1	secondary	married	fonctionnaire	peulh	access	notaccess	notaccess	yes	yes	no	yes	[3,5]	0			-3.62044	Low SEP	10	negative
month7	7011	2010	Male	2022-12-16	11.3	Foulawa	[50,77]	1	secondary	married	unemployed	peulh	notaccess	access	access	yes	yes	no	yes	(5,12]	0			-3.45209	Low SEP	12	negative
month7	7013	2012	Female	2022-12-14	11.4	Foulawa	[50,77]	1	no_formal_education	married	unemployed	peulh	access	access	notaccess	no	no	no	yes	(5,12]	0			-0.420177	Middle SEP	10	negative
month7	7020	2010	Male	2022-12-14	8	Foulawa	[35,50)	1	secondary	married	fonctionnaire	peulh	notaccess	access	access	yes	no	no	no	(5,12]	0			0.0819717	High SEP	12	negative
month7	7022	2008	Female	2022-12-14	15.7	Foulawa	[50,77]	1	no_formal_education	married	agriculteur	peulh	notaccess	notaccess	notaccess	no	no	no	no	(5,12]	0			7.07676	High SEP	14	negative
month7	7023	2012	Male	2022-12-14	14.5	Foulawa	[35,50)	1	secondary	married	fonctionnaire	peulh	notaccess	access	access	yes	no	no	no	(5,12]	0			0.0823459	High SEP	10	negative
month7	7029	2012	Male	2022-12-19	13.4	Carrefour_Fodéyah	[35,50)	2	secondary	married	unemployed	peulh	notaccess	access	access	no	no	no	yes	[3,5]	0			-4.49334	Low SEP	10	negative
month7	7033	2012	Male	2022-12-15	11.7	Foulawa	[22,35)	2	secondary	married	fonctionnaire	peulh	notaccess	access	access	yes	yes	no	no	[3,5]	0			-0.377258	Middle SEP	10	negative
month7	7039	2012	Female	2022-12-15	12.6	Hafia	[22,35)	2	secondary	married	commerçant	peulh	notaccess	notaccess	access	yes	yes	no	yes	[3,5]	0			-2.24533	Low SEP	10	negative
month7	7043	2011	Female	2022-12-22	13.9	Layah	[22,35)	2	secondary	single	unemployed	soussou	access	access	access	yes	yes	no	yes	(5,12]	0			0.872961	High SEP	11	negative
month7	7048	2008	Female	2022-12-22	11	Layah	[50,77]	2	secondary	married	agriculteur	soussou	notaccess	access	notaccess	yes	yes	yes	yes	(12,35]	0			-1.22226	Middle SEP	14	negative
month7	7049	2011	Male	2022-12-22	12	Layah	[50,77]	2	secondary	married	agriculteur	soussou	notaccess	access	notaccess	yes	yes	yes	yes	(12,35]	0			-1.22214	Middle SEP	11	negative
month7	7052	2010	Female	2022-12-22	12.5	Layah	[50,77]	2	no_formal_education	married	unemployed	soussou	notaccess	access	access	no	no	no	yes	(5,12]	0			-2.885	Low SEP	12	negative
month7	7056	2012	Male	2022-12-22	5.9	Carrefour_Fodéyah	[35,50)	1	primary	married	unemployed	soussou	access	access	access	no	no	no	no	(5,12]	14195	200	PF + Gf	7.081	High SEP	10	positive
month7	7057	2012	Female	2022-12-22	13.7	Carrefour_Fodéyah	[35,50)	1	primary	married	unemployed	soussou	access	access	access	no	no	no	no	(5,12]	0			7.08112	High SEP	10	negative
month7	7061	2010	Male	2022-12-23	11.6	Carrefour_Fodéyah	[35,50)	1	primary	married	unemployed	soussou	access	access	access	no	no	no	no	(5,12]	0			7.08162	High SEP	12	negative
month7	7064	2008	Male	2022-12-22	12	Layah	[35,50)	2	secondary	married	unemployed	soussou	access	access	access	no	no	no	yes	[3,5]	0			-2.08031	Middle SEP	14	negative
month7	7065	2011	Female	2022-12-22	11.5	Layah	[35,50)	2	secondary	married	unemployed	soussou	access	access	access	no	no	no	yes	[3,5]	0			-2.08019	Middle SEP	11	negative
month7	7070	2011	Male	2022-12-22	11.9	Layah	[35,50)	2	no_formal_education	married	unemployed	soussou	notaccess	notaccess	notaccess	no	no	no	yes	(5,12]	0			-2.01029	Middle SEP	11	negative
month7	7071	2010	Male	2022-12-22	13.2	Layah	[35,50)	2	no_formal_education	married	unemployed	soussou	notaccess	notaccess	notaccess	no	no	no	yes	(5,12]	0			-2.01016	Middle SEP	12	negative
month7	7081	2010	Male	2022-12-22	12.8	Layah	[35,50)	2	no_formal_education	married	unemployed	soussou	access	access	notaccess	yes	yes	no	no	(5,12]	0			0.643027	High SEP	12	negative
month7	7087	2008	Female	2022-12-16	10.5	Loumafori	[35,50)	2	secondary	married	unemployed	autres	notaccess	access	notaccess	yes	yes	no	no	[3,5]	0			-0.130631	High SEP	14	negative
month7	7098	2010	Male	2022-12-16	12	Olympio	[22,35)	2	primary	married	unemployed	autres	access	access	access	yes	yes	no	yes	(5,12]	0			-0.391305	Middle SEP	12	negative
month7	7108	2010	Male	2022-12-16	13.2	Olympio	[35,50)	2	secondary	married	commerçant	peulh	notaccess	access	notaccess	yes	yes	no	no	(5,12]	0			-1.12838	Middle SEP	12	negative
month7	7112	2009	Female	2022-12-16	12.7	Olympio	[22,35)	2	primary	married	unemployed	peulh	notaccess	access	access	yes	yes	no	yes	[3,5]	0			-2.22735	Low SEP	13	negative
month7	7113	2010	Female	2022-12-16	13.1	Olympio	[22,35)	2	primary	married	unemployed	peulh	notaccess	access	access	yes	yes	no	yes	[3,5]	0			-2.22723	Low SEP	12	negative
month7	7116	2010	Male	2022-12-16	13.5	Olympio	[35,50)	2	no_formal_education	married	commerçant	peulh	notaccess	notaccess	notaccess	yes	no	no	yes	(5,12]	0			-2.94599	Low SEP	12	negative
month7	7117	2012	Female	2022-12-16	13.4	Olympio	[35,50)	2	no_formal_education	married	commerçant	peulh	notaccess	notaccess	notaccess	yes	no	no	yes	(5,12]	0			-2.94586	Low SEP	10	negative
month7	7131	2012	Female	2022-12-27	11.2	Loumafori	[50,77]	1	secondary	married	unemployed	soussou	notaccess	notaccess	notaccess	yes	yes	no	yes	(5,12]	0			0.331091	High SEP	10	negative
month7	7133	2010	Male	2022-12-23	12	Hafia	[22,35)	2	secondary	married	unemployed	autres	notaccess	access	access	yes	yes	no	yes	(5,12]	0			-2.60487	Low SEP	12	negative
month7	7136	2009	Female	2022-12-23	11.4	Hafia	[22,35)	2	secondary	married	unemployed	autres	notaccess	access	access	yes	yes	no	yes	(5,12]	0			-2.6045	Low SEP	13	negative
month7	7141	2009	Male	2022-12-27	11.8	Loumafori	[50,77]	1	no_formal_education	married	agriculteur	soussou	access	access	notaccess	yes	yes	no	yes	(5,12]	0			-2.92113	Low SEP	13	negative
month7	7154	2010	Male	2022-12-27	14.4	Loumafori	[50,77]	1	secondary	married	unemployed	peulh	access	access	notaccess	yes	yes	no	yes	(12,35]	0			-3.47293	Low SEP	12	negative
month7	7156	2008	Male	2022-12-27	13.1	Loumafori	[50,77]	1	secondary	married	unemployed	peulh	access	access	notaccess	yes	yes	no	yes	(12,35]	0			-3.47268	Low SEP	14	negative
month7	7162	2012	Female	2022-12-23	11.6	Hafia	[22,35)	2	secondary	married	fonctionnaire	peulh	notaccess	notaccess	notaccess	no	no	no	no	(5,12]	0			-1.86632	Middle SEP	10	negative
month7	7179	2009	Female	2022-12-21	11.5	Layah	[50,77]	2	no_formal_education	married	unemployed	soussou	notaccess	access	access	no	no	no	no	(5,12]	0			7.09634	High SEP	13	negative
month7	7180	2010	Female	2022-12-21	12.2	Layah	[50,77]	2	no_formal_education	married	unemployed	soussou	notaccess	access	access	no	no	no	no	(5,12]	0			7.09646	High SEP	12	negative
month7	7181	2010	Male	2022-12-21	13.8	Carrefour_Fodéyah	[50,77]	2	secondary	single	unemployed	peulh	access	access	access	yes	yes	no	yes	(5,12]	0			-2.78035	Low SEP	12	negative
month7	7187	2010	Male	2022-12-21	10.6	Carrefour_Fodéyah	[22,35)	1	secondary	married	unemployed	soussou	notaccess	access	access	no	no	no	no	(5,12]	0			7.09734	High SEP	12	negative
month7	7194	2009	Female	2022-12-21	11	Carrefour_Fodéyah	[35,50)	1	primary	married	unemployed	soussou	access	access	access	no	no	no	yes	(12,35]	0			-0.226089	High SEP	13	negative
month7	7195	2009	Female	2022-12-20	12.5	Carrefour_Fodéyah	[35,50)	1	primary	married	unemployed	soussou	access	access	access	no	no	no	yes	(12,35]	0			-0.225965	High SEP	13	negative
month7	7196	2011	Male	2022-12-21	17	Carrefour_Fodéyah	[35,50)	1	secondary	married	unemployed	autres	access	access	access	yes	yes	no	yes	(12,35]	0			-2.39061	Low SEP	11	negative
month7	7199	2009	Male	2022-12-21	10.1	Carrefour_Fodéyah	[35,50)	1	secondary	married	unemployed	autres	access	access	access	yes	yes	no	yes	(12,35]	0			-2.39023	Low SEP	13	negative
month7	7200	2011	Male	2022-12-21	15.8	Foulawa	[50,77]	1	secondary	married	fonctionnaire	peulh	access	access	notaccess	yes	yes	no	yes	[3,5]	0			-2.40842	Low SEP	11	negative
month7	7202	2011	Male	2022-12-21	10.4	Foulawa	[50,77]	1	secondary	married	fonctionnaire	peulh	access	access	notaccess	yes	yes	no	yes	[3,5]	0			-2.40817	Low SEP	11	negative
month7	7207	2008	Female	2022-12-21	13	Carrefour_Fodéyah	[22,35)	2	secondary	married	unemployed	soussou	notaccess	access	access	no	no	no	yes	[3,5]	0			-2.26994	Low SEP	14	negative
month7	7215	2009	Male	2022-12-19	10.3	Olympio	[50,77]	1	secondary	married	agriculteur	soussou	access	access	notaccess	yes	yes	no	no	(12,35]	0			-1.31464	Middle SEP	13	negative
month7	7216	2012	Female	2022-12-19	10.9	Olympio	[50,77]	1	secondary	married	agriculteur	soussou	access	access	notaccess	yes	yes	no	no	(12,35]	0			-1.31451	Middle SEP	10	negative
month7	7217	2012	Male	2022-12-19	11.3	Olympio	[50,77]	1	secondary	married	agriculteur	soussou	access	access	notaccess	yes	yes	no	no	(12,35]	0			-1.31439	Middle SEP	10	negative
month7	7224	2010	Male	2022-12-19	10.1	Carrefour_Fodéyah	[22,35)	2	primary	married	unemployed	soussou	access	access	notaccess	no	no	no	no	(5,12]	0			7.10195	High SEP	12	negative
month7	7225	2012	Male	2022-12-19	10.8	Carrefour_Fodéyah	[22,35)	2	primary	married	unemployed	soussou	access	access	notaccess	no	no	no	no	(5,12]	0			7.10208	High SEP	10	negative
month7	7234	2008	Male	2022-12-19	13.2	Sarata	[22,35)	2	primary	married	unemployed	soussou	access	access	notaccess	no	no	no	no	(5,12]	0			7.1032	High SEP	14	negative
month7	7235	2009	Male	2022-12-28	13.5	Tanene	[22,35)	2	no_formal_education	married	commerçant	soussou	notaccess	access	notaccess	yes	yes	no	no	(12,35]	0			-2.11056	Middle SEP	13	negative
month7	7260	2009	Female	2022-12-20	12	Kimara	[22,35)	1	secondary	married	fonctionnaire	autres	notaccess	notaccess	notaccess	yes	yes	no	yes	(5,12]	0			-3.12052	Low SEP	13	negative
month7	7265	2009	Female	2022-12-14	12.6	Kimara	[35,50)	2	primary	married	unemployed	autres	access	access	access	yes	yes	no	yes	[3,5]	0			-3.13482	Low SEP	13	negative
month7	7266	2009	Female	2022-12-14	14.3	Kimara	[35,50)	1	primary	married	unemployed	autres	notaccess	access	notaccess	yes	yes	no	yes	[3,5]	0			0.0283716	High SEP	13	negative
month7	7273	2009	Male	2022-12-14	11.8	Kimara	[50,77]	2	primary	single	commerçant	autres	access	access	notaccess	yes	yes	no	yes	(5,12]	0			0.569268	High SEP	13	negative
month7	7274	2009	Male	2022-12-28	12.3	Sarata	[35,50)	2	secondary	single	commerçant	soussou	notaccess	notaccess	notaccess	yes	no	no	yes	(5,12]	0			-0.0685308	High SEP	13	negative
month7	7275	2012	Male	2022-12-28	11.7	Sarata	[35,50)	2	secondary	single	commerçant	soussou	notaccess	notaccess	notaccess	yes	no	no	yes	(5,12]	0			-0.0684061	High SEP	10	negative
month7	7277	2010	Female	2022-12-28	10.2	Sarata	[35,50)	2	secondary	single	commerçant	soussou	notaccess	notaccess	notaccess	yes	no	no	yes	(5,12]	0			-0.0681566	High SEP	12	negative
month7	7292	2010	Female	2022-12-20	11.8	Sarata	[50,77]	1	secondary	married	agriculteur	soussou	access	access	notaccess	no	no	no	yes	(5,12]	0			-0.242698	Middle SEP	12	negative
month7	7298	2010	Male	2022-12-20	9.8	Tanene	[22,35)	2	no_formal_education	married	commerçant	soussou	notaccess	access	notaccess	no	no	no	no	(5,12]	0			7.11118	High SEP	12	negative
month7	7304	2010	Male	2022-12-20	13.1	Foulawa	[35,50)	1	secondary	married	fonctionnaire	peulh	notaccess	access	access	no	no	no	no	(5,12]	0			7.11193	High SEP	12	negative
month7	7315	2009	Female	2022-12-20	15	Sarata	[50,77]	1	no_formal_education	married	agriculteur	soussou	notaccess	notaccess	notaccess	no	no	no	no	(5,12]	0			7.1133	High SEP	13	negative
month7	7316	2010	Male	2022-12-20	12.6	Sarata	[50,77]	1	no_formal_education	married	agriculteur	soussou	notaccess	notaccess	notaccess	no	no	no	no	(5,12]	0			7.11343	High SEP	12	negative
month7	7317	2012	Male	2022-12-20	11.4	Sarata	[50,77]	1	no_formal_education	married	agriculteur	soussou	notaccess	notaccess	notaccess	no	no	no	no	(5,12]	0			7.11355	High SEP	10	negative
month7	7323	2009	Male	2022-12-22	13.6	Layah	[35,50)	2	no_formal_education	married	commerçant	soussou	notaccess	notaccess	notaccess	yes	yes	no	yes	[3,5]	0			-0.669131	Middle SEP	13	negative
month7	7324	2011	Female	2022-12-22	12.2	Layah	[35,50)	2	no_formal_education	married	commerçant	soussou	notaccess	notaccess	notaccess	yes	yes	no	yes	[3,5]	0			-0.669006	Middle SEP	11	negative
month7	7338	2010	Female	2022-12-19	12.2	Maire_daouda	[22,35)	2	secondary	married	unemployed	soussou	access	access	access	yes	yes	no	yes	(5,12]	0			-2.21693	Low SEP	12	negative
month7	7344	2010	Female	2022-12-22	11.8	Layah	[35,50)	2	no_formal_education	married	commerçant	soussou	notaccess	notaccess	notaccess	yes	yes	no	yes	[3,5]	0			-0.666511	Middle SEP	12	negative
month7	7347	2010	Female	2022-12-22	13	Layah	[35,50)	2	no_formal_education	married	commerçant	soussou	notaccess	notaccess	notaccess	no	no	no	no	(5,12]	0			7.1173	High SEP	12	negative
month7	7359	2008	Male	2022-12-22	10.1	Layah	[22,35)	2	secondary	married	unemployed	soussou	notaccess	access	access	no	no	no	no	(5,12]	0			-3.28043	Low SEP	14	negative
month7	7372	2012	Female	2022-12-23	13	Hafia	[35,50)	2	no_formal_education	married	commerçant	peulh	access	access	access	no	no	no	no	(5,12]	0			-3.2721	Low SEP	10	negative
month7	7374	2010	Female	2022-12-23	12.3	Hafia	[35,50)	2	no_formal_education	married	commerçant	peulh	access	access	access	no	no	no	no	(5,12]	0			-3.27185	Low SEP	12	negative
month7	7383	2009	Female	2022-12-23	13.4	Hafia	[50,77]	2	no_formal_education	single	commerçant	autres	notaccess	notaccess	notaccess	yes	yes	no	no	(5,12]	0			-0.716141	Middle SEP	13	negative
month7	7391	2008	Male	2022-12-27	12	Loumafori	[50,77]	1	no_formal_education	married	unemployed	peulh	notaccess	access	notaccess	yes	yes	no	no	(12,35]	0			-3.06527	Low SEP	14	negative
month8	7009	2010	Male	2023-01-09	9.6	Foulawa	[50,77]	1	secondary	married	unemployed	peulh	notaccess	access	access	yes	yes	no	yes	(5,12]	0			-3.45234	Low SEP	13	negative
month8	7012	2010	Male	2023-01-09	10.8	Foulawa	[50,77]	1	secondary	married	unemployed	peulh	notaccess	access	access	yes	yes	no	yes	(5,12]	0			-3.45196	Low SEP	13	negative
month8	7024	2013	Female	2023-01-05	10.6	Foulawa	[50,77]	1	no_formal_education	married	agriculteur	peulh	notaccess	notaccess	notaccess	no	no	no	no	(5,12]	0			7.07701	High SEP	10	negative
month8	7036	2010	Female	2023-01-05	14	Hafia	[22,35)	2	secondary	married	commerçant	peulh	notaccess	notaccess	access	yes	yes	no	yes	[3,5]	0			-2.2457	Low SEP	13	negative
month8	7042	2013	Female	2023-01-06	12.4	Foulawa	[50,77]	1	secondary	married	fonctionnaire	peulh	access	access	access	no	no	no	no	(5,12]	0			-4.26904	Low SEP	10	negative
month8	7043	2012	Male	2023-01-09	14	Layah	[22,35)	2	secondary	single	unemployed	soussou	access	access	access	yes	yes	no	yes	(5,12]	0			0.872961	High SEP	11	negative
month8	7049	2011	Male	2023-01-11	10.8	Layah	[50,77]	2	secondary	married	agriculteur	soussou	notaccess	access	notaccess	yes	yes	yes	yes	(12,35]	0			-1.22214	Middle SEP	12	negative
month8	7052	2010	Female	2023-01-09	10.5	Layah	[50,77]	2	no_formal_education	married	unemployed	soussou	notaccess	access	access	no	no	no	yes	(5,12]	0			-2.885	Low SEP	13	negative
month8	7056	2012	Male	2023-01-11	12	Carrefour_Fodéyah	[35,50)	1	primary	married	unemployed	soussou	access	access	access	no	no	no	no	(5,12]	0			7.081	High SEP	11	negative
month8	7057	2012	Female	2023-01-11	11.1	Carrefour_Fodéyah	[35,50)	1	primary	married	unemployed	soussou	access	access	access	no	no	no	no	(5,12]	0			7.08112	High SEP	11	negative
month8	7061	2010	Male	2023-01-11	13	Carrefour_Fodéyah	[35,50)	1	primary	married	unemployed	soussou	access	access	access	no	no	no	no	(5,12]	0			7.08162	High SEP	13	negative
month8	7062	2013	Male	2023-01-11	12.3	Carrefour_Fodéyah	[35,50)	1	primary	married	unemployed	soussou	access	access	access	no	no	no	no	(5,12]	0			7.08175	High SEP	10	negative
month8	7065	2011	Female	2023-01-09	12.3	Layah	[35,50)	2	secondary	married	unemployed	soussou	access	access	access	no	no	no	yes	[3,5]	0			-2.08019	Middle SEP	12	negative
month8	7070	2011	Male	2023-01-09	11.3	Layah	[35,50)	2	no_formal_education	married	unemployed	soussou	notaccess	notaccess	notaccess	no	no	no	yes	(5,12]	2160	0	Pf	-2.01029	Middle SEP	12	positive
month8	7071	2010	Male	2023-01-09	12	Layah	[35,50)	2	no_formal_education	married	unemployed	soussou	notaccess	notaccess	notaccess	no	no	no	yes	(5,12]	0			-2.01016	Middle SEP	13	negative
month8	7077	2013	Female	2023-01-09	12.3	Sarata	[50,77]	2	no_formal_education	married	agriculteur	autres	access	access	access	yes	yes	no	yes	(12,35]	0			-0.37647	Middle SEP	10	negative
month8	7078	2013	Female	2023-01-09	11.6	Sarata	[50,77]	2	no_formal_education	married	agriculteur	autres	access	access	access	yes	yes	no	yes	(12,35]	0			-0.376346	Middle SEP	10	negative
month8	7081	2010	Male	2023-01-11	13.2	Layah	[35,50)	2	no_formal_education	married	unemployed	soussou	access	access	notaccess	yes	yes	no	no	(5,12]	0			0.643027	High SEP	13	negative
month8	7098	2010	Male	2023-01-09	11.9	Olympio	[22,35)	2	primary	married	unemployed	autres	access	access	access	yes	yes	no	yes	(5,12]	0			-0.391305	Middle SEP	13	negative
month8	7108	2010	Male	2023-01-09	12.7	Olympio	[35,50)	2	secondary	married	commerçant	peulh	notaccess	access	notaccess	yes	yes	no	no	(5,12]	0			-1.12838	Middle SEP	13	negative
month8	7109	2013	Male	2023-01-09	13.1	Olympio	[35,50)	2	secondary	married	commerçant	peulh	notaccess	access	notaccess	yes	yes	no	no	(5,12]	0			-1.12825	Middle SEP	10	negative
month8	7112	2009	Female	2023-01-09	13.1	Olympio	[22,35)	2	primary	married	unemployed	peulh	notaccess	access	access	yes	yes	no	yes	[3,5]	0			-2.22735	Low SEP	14	negative
month8	7113	2010	Female	2023-01-09	12.3	Olympio	[22,35)	2	primary	married	unemployed	peulh	notaccess	access	access	yes	yes	no	yes	[3,5]	0			-2.22723	Low SEP	13	negative
month8	7116	2010	Male	2023-01-09	12.3	Olympio	[35,50)	2	no_formal_education	married	commerçant	peulh	notaccess	notaccess	notaccess	yes	no	no	yes	(5,12]	0			-2.94599	Low SEP	13	negative
month8	7117	2012	Female	2023-01-09	16.23	Olympio	[35,50)	2	no_formal_education	married	commerçant	peulh	notaccess	notaccess	notaccess	yes	no	no	yes	(5,12]	0			-2.94586	Low SEP	11	negative
month8	7131	2012	Female	2023-01-18	12.5	Loumafori	[50,77]	1	secondary	married	unemployed	soussou	notaccess	notaccess	notaccess	yes	yes	no	yes	(5,12]	0			0.331091	High SEP	11	negative
month8	7133	2010	Male	2023-01-19	11.8	Hafia	[22,35)	2	secondary	married	unemployed	autres	notaccess	access	access	yes	yes	no	yes	(5,12]	0			-2.60487	Low SEP	13	negative
month8	7136	2009	Female	2023-01-19	13.2	Hafia	[22,35)	2	secondary	married	unemployed	autres	notaccess	access	access	yes	yes	no	yes	(5,12]	0			-2.6045	Low SEP	14	negative
month8	7141	2009	Male	2023-01-18	13.1	Loumafori	[50,77]	1	no_formal_education	married	agriculteur	soussou	access	access	notaccess	yes	yes	no	yes	(5,12]	0			-2.92113	Low SEP	14	negative
month8	7142	2013	Male	2023-01-18	12	Loumafori	[50,77]	1	no_formal_education	married	agriculteur	soussou	access	access	notaccess	yes	yes	no	yes	(5,12]	0			-2.92101	Low SEP	10	negative
month8	7154	2010	Male	2023-01-18	12.7	Loumafori	[50,77]	1	secondary	married	unemployed	peulh	access	access	notaccess	yes	yes	no	yes	(12,35]	0			-3.47293	Low SEP	13	negative
month8	7162	2012	Female	2023-01-19	11.3	Hafia	[22,35)	2	secondary	married	fonctionnaire	peulh	notaccess	notaccess	notaccess	no	no	no	no	(5,12]	0			-1.86632	Middle SEP	11	negative
month8	7179	2009	Female	2023-01-16	11.5	Layah	[50,77]	2	no_formal_education	married	unemployed	soussou	notaccess	access	access	no	no	no	no	(5,12]	0			7.09634	High SEP	14	negative
month8	7180	2010	Female	2023-01-16	12.1	Layah	[50,77]	2	no_formal_education	married	unemployed	soussou	notaccess	access	access	no	no	no	no	(5,12]	0			7.09646	High SEP	13	negative
month8	7181	2010	Male	2023-01-16	13.1	Carrefour_Fodéyah	[50,77]	2	secondary	single	unemployed	peulh	access	access	access	yes	yes	no	yes	(5,12]	688	0	Pf	-2.78035	Low SEP	13	positive
month8	7183	2013	Male	2023-01-16	11.2	Carrefour_Fodéyah	[50,77]	2	secondary	single	unemployed	peulh	access	access	access	yes	yes	no	yes	(5,12]	0			-2.7801	Low SEP	10	negative
month8	7187	2010	Male	2023-01-16	11	Carrefour_Fodéyah	[22,35)	1	secondary	married	unemployed	soussou	notaccess	access	access	no	no	no	no	(5,12]	0			7.09734	High SEP	13	negative
month8	7194	2009	Female	2023-01-16	12.4	Carrefour_Fodéyah	[35,50)	1	primary	married	unemployed	soussou	access	access	access	no	no	no	yes	(12,35]	0			-0.226089	High SEP	14	negative
month8	7195	2009	Female	2023-01-16	10.2	Carrefour_Fodéyah	[35,50)	1	primary	married	unemployed	soussou	access	access	access	no	no	no	yes	(12,35]	0			-0.225965	High SEP	14	negative
month8	7196	2011	Male	2023-01-16	17.4	Carrefour_Fodéyah	[35,50)	1	secondary	married	unemployed	autres	access	access	access	yes	yes	no	yes	(12,35]	0			-2.39061	Low SEP	12	negative
month8	7199	2009	Male	2023-01-16	6.8	Carrefour_Fodéyah	[35,50)	1	secondary	married	unemployed	autres	access	access	access	yes	yes	no	yes	(12,35]	0			-2.39023	Low SEP	14	negative
month8	7200	2011	Male	2023-01-16	15.1	Foulawa	[50,77]	1	secondary	married	fonctionnaire	peulh	access	access	notaccess	yes	yes	no	yes	[3,5]	0			-2.40842	Low SEP	12	negative
month8	7202	2011	Male	2023-01-16	12.1	Foulawa	[50,77]	1	secondary	married	fonctionnaire	peulh	access	access	notaccess	yes	yes	no	yes	[3,5]	0			-2.40817	Low SEP	12	negative
month8	7215	2009	Male	2023-01-12	11.2	Olympio	[50,77]	1	secondary	married	agriculteur	soussou	access	access	notaccess	yes	yes	no	no	(12,35]	0			-1.31464	Middle SEP	14	negative
month8	7216	2012	Female	2023-01-12	11	Olympio	[50,77]	1	secondary	married	agriculteur	soussou	access	access	notaccess	yes	yes	no	no	(12,35]	0			-1.31451	Middle SEP	11	negative
month8	7217	2012	Male	2023-01-12	9.9	Olympio	[50,77]	1	secondary	married	agriculteur	soussou	access	access	notaccess	yes	yes	no	no	(12,35]	0			-1.31439	Middle SEP	11	negative
month8	7224	2010	Male	2023-01-13	12.8	Carrefour_Fodéyah	[22,35)	2	primary	married	unemployed	soussou	access	access	notaccess	no	no	no	no	(5,12]	0			7.10195	High SEP	13	negative
month8	7225	2012	Male	2023-01-13	10.3	Carrefour_Fodéyah	[22,35)	2	primary	married	unemployed	soussou	access	access	notaccess	no	no	no	no	(5,12]	560	0	Pf	7.10208	High SEP	11	positive
month8	7228	2013	Female	2023-01-12	12.6	Olympio	[50,77]	1	secondary	married	agriculteur	soussou	access	access	notaccess	yes	yes	no	yes	(5,12]	0			-2.90328	Low SEP	10	negative
month8	7235	2009	Male	2023-01-12	14.6	Tanene	[22,35)	2	no_formal_education	married	commerçant	soussou	notaccess	access	notaccess	yes	yes	no	no	(12,35]	0			-2.11056	Middle SEP	14	negative
month8	7241	2011	Female	2023-01-13	10.5	Kimara	[35,50)	1	primary	married	fonctionnaire	autres	access	access	access	no	no	no	no	(5,12]	0			7.10407	High SEP	12	negative
month8	7265	2009	Female	2023-01-06	10.7	Kimara	[35,50)	2	primary	married	unemployed	autres	access	access	access	yes	yes	no	yes	[3,5]	0			-3.13482	Low SEP	14	negative
month8	7266	2009	Female	2023-01-06	14.5	Kimara	[35,50)	1	primary	married	unemployed	autres	notaccess	access	notaccess	yes	yes	no	yes	[3,5]	0			0.0283716	High SEP	14	negative
month8	7273	2009	Male	2023-01-05	10.6	Kimara	[50,77]	2	primary	single	commerçant	autres	access	access	notaccess	yes	yes	no	yes	(5,12]	0			0.569268	High SEP	14	negative
month8	7274	2009	Male	2023-01-18	12.9	Sarata	[35,50)	2	secondary	single	commerçant	soussou	notaccess	notaccess	notaccess	yes	no	no	yes	(5,12]	0			-0.0685308	High SEP	14	negative
month8	7275	2012	Male	2023-01-18	13.1	Sarata	[35,50)	2	secondary	single	commerçant	soussou	notaccess	notaccess	notaccess	yes	no	no	yes	(5,12]	0			-0.0684061	High SEP	11	negative
month8	7277	2010	Female	2023-01-18	10.8	Sarata	[35,50)	2	secondary	single	commerçant	soussou	notaccess	notaccess	notaccess	yes	no	no	yes	(5,12]	0			-0.0681566	High SEP	13	negative
month8	7292	2010	Female	2023-01-17	13.7	Sarata	[50,77]	1	secondary	married	agriculteur	soussou	access	access	notaccess	no	no	no	yes	(5,12]	0			-0.242698	Middle SEP	13	negative
month8	7293	2013	Male	2023-01-17	11.8	Layah	[35,50)	2	secondary	married	fonctionnaire	autres	notaccess	access	access	no	no	no	no	(5,12]	0			7.11056	High SEP	10	negative
month8	7295	2013	Male	2023-01-16	11.5	Foulawa	[35,50)	1	secondary	single	commerçant	peulh	notaccess	notaccess	notaccess	no	no	no	no	(5,12]	0			7.11081	High SEP	10	negative
month8	7298	2010	Male	2023-01-16	8.9	Tanene	[22,35)	2	no_formal_education	married	commerçant	soussou	notaccess	access	notaccess	no	no	no	no	(5,12]	0			7.11118	High SEP	13	negative
month8	7299	2013	Male	2023-01-16	9.1	Tanene	[22,35)	2	no_formal_education	married	commerçant	soussou	notaccess	access	notaccess	no	no	no	no	(5,12]	0			7.11131	High SEP	10	negative
month8	7301	2013	Male	2023-01-17	14.1	Sarata	[50,77]	1	secondary	married	unemployed	soussou	access	access	access	yes	yes	no	no	(12,35]	0			-0.937437	Middle SEP	10	negative
month8	7304	2010	Male	2023-01-18	13.8	Foulawa	[35,50)	1	secondary	married	fonctionnaire	peulh	notaccess	access	access	no	no	no	no	(5,12]	0			7.11193	High SEP	13	negative
month8	7315	2009	Female	2023-01-17	14	Sarata	[50,77]	1	no_formal_education	married	agriculteur	soussou	notaccess	notaccess	notaccess	no	no	no	no	(5,12]	0			7.1133	High SEP	14	negative
month8	7316	2010	Male	2023-01-17	13.3	Sarata	[50,77]	1	no_formal_education	married	agriculteur	soussou	notaccess	notaccess	notaccess	no	no	no	no	(5,12]	0			7.11343	High SEP	13	negative
month8	7317	2012	Male	2023-01-17	12.2	Sarata	[50,77]	1	no_formal_education	married	agriculteur	soussou	notaccess	notaccess	notaccess	no	no	no	no	(5,12]	0			7.11355	High SEP	11	negative
month8	7319	2013	Male	2023-01-16	14.2	Sarata	[35,50)	1	secondary	married	unemployed	peulh	access	access	access	yes	yes	yes	yes	[3,5]	0			-1.11041	Middle SEP	10	negative
month8	7323	2009	Male	2023-01-09	11.8	Layah	[35,50)	2	no_formal_education	married	commerçant	soussou	notaccess	notaccess	notaccess	yes	yes	no	yes	[3,5]	0			-0.669131	Middle SEP	14	negative
month8	7324	2011	Female	2023-01-09	13	Layah	[35,50)	2	no_formal_education	married	commerçant	soussou	notaccess	notaccess	notaccess	yes	yes	no	yes	[3,5]	0			-0.669006	Middle SEP	12	negative
month8	7327	2013	Male	2023-01-11	14	Maire_daouda	[35,50)	1	secondary	married	fonctionnaire	soussou	access	notaccess	access	no	no	no	yes	[3,5]	0			-0.985579	Middle SEP	10	negative
month8	7338	2010	Female	2023-01-11	11.5	Maire_daouda	[22,35)	2	secondary	married	unemployed	soussou	access	access	access	yes	yes	no	yes	(5,12]	0			-2.21693	Low SEP	13	negative
month8	7341	2013	Female	2023-01-19	12	Tanene	[35,50)	2	no_formal_education	married	commerçant	soussou	notaccess	access	notaccess	no	no	no	no	(5,12]	0			7.11655	High SEP	10	negative
month8	7344	2010	Female	2023-01-10	12	Layah	[35,50)	2	no_formal_education	married	commerçant	soussou	notaccess	notaccess	notaccess	yes	yes	no	yes	[3,5]	0			-0.666511	Middle SEP	13	negative
month8	7347	2010	Female	2023-01-11	12	Layah	[35,50)	2	no_formal_education	married	commerçant	soussou	notaccess	notaccess	notaccess	no	no	no	no	(5,12]	0			7.1173	High SEP	13	negative
month8	7372	2012	Female	2023-01-19	12.3	Hafia	[35,50)	2	no_formal_education	married	commerçant	peulh	access	access	access	no	no	no	no	(5,12]	0			-3.2721	Low SEP	11	negative
month8	7374	2010	Female	2023-01-19	10.3	Hafia	[35,50)	2	no_formal_education	married	commerçant	peulh	access	access	access	no	no	no	no	(5,12]	0			-3.27185	Low SEP	13	negative
month8	7379	2013	Male	2023-01-09	11.4	Layah	[22,35)	2	primary	single	unemployed	soussou	access	access	access	no	no	no	yes	[3,5]	0			0.350073	High SEP	10	negative
month8	7383	2009	Female	2023-01-18	13	Hafia	[50,77]	2	no_formal_education	single	commerçant	autres	notaccess	notaccess	notaccess	yes	yes	no	no	(5,12]	0			-0.716141	Middle SEP	14	negative
month9	7007	2011	Female	2023-02-13	10.3	Foulawa	[35,50)	1	secondary	married	commerçant	peulh	access	access	notaccess	yes	yes	no	yes	(5,12]	0			-1.44789	Middle SEP	12	negative
month9	7012	2013	Male	2023-02-14	10.3	Foulawa	[50,77]	1	secondary	married	unemployed	peulh	notaccess	access	access	yes	yes	no	yes	(5,12]	0			-3.45196	Low SEP	10	negative
month9	7019	2009	Female	2023-02-13	10.5	Foulawa	[35,50)	1	secondary	married	fonctionnaire	peulh	notaccess	access	access	yes	no	no	no	(5,12]	0			0.081847	High SEP	14	negative
month9	7021	2009	Male	2023-02-13	11	Carrefour_Fodéyah	[35,50)	2	secondary	married	unemployed	peulh	notaccess	access	access	no	no	no	no	(5,12]	0			7.07663	High SEP	14	negative
month9	7029	2010	Female	2023-02-14	12.1	Carrefour_Fodéyah	[35,50)	2	secondary	married	unemployed	peulh	notaccess	access	access	no	no	no	yes	[3,5]	0			-4.49334	Low SEP	13	negative
month9	7031	2013	Male	2023-02-14	12.7	Carrefour_Fodéyah	[35,50)	2	secondary	married	unemployed	peulh	notaccess	access	access	no	no	no	yes	[3,5]	0			-4.49309	Low SEP	10	negative
month9	7032	2010	Female	2023-02-14	14	Foulawa	[22,35)	2	secondary	married	fonctionnaire	peulh	notaccess	access	access	yes	yes	no	no	[3,5]	0			-0.377383	Middle SEP	13	negative
month9	7033	2013	Male	2023-02-14	11.2	Foulawa	[22,35)	2	secondary	married	fonctionnaire	peulh	notaccess	access	access	yes	yes	no	no	[3,5]	0			-0.377258	Middle SEP	10	negative
month9	7035	2010	Female	2023-02-13	11.6	Foulawa	[22,35)	2	secondary	married	fonctionnaire	peulh	notaccess	access	access	yes	yes	no	no	[3,5]	0			-0.377009	Middle SEP	13	negative
month9	7049	2011	Male	2023-02-23	11.4	Layah	[50,77]	2	secondary	married	agriculteur	soussou	notaccess	access	notaccess	yes	yes	yes	yes	(12,35]	0			-1.22214	Middle SEP	12	negative
month9	7052	2010	Female	2023-02-23	11	Layah	[50,77]	2	no_formal_education	married	unemployed	soussou	notaccess	access	access	no	no	no	yes	(5,12]	0			-2.885	Low SEP	13	negative
month9	7056	2012	Male	2023-02-23	11.8	Carrefour_Fodéyah	[35,50)	1	primary	married	unemployed	soussou	access	access	access	no	no	no	no	(5,12]	0			7.081	High SEP	11	negative
month9	7057	2012	Female	2023-02-23	12.1	Carrefour_Fodéyah	[35,50)	1	primary	married	unemployed	soussou	access	access	access	no	no	no	no	(5,12]	0			7.08112	High SEP	11	negative
month9	7061	2010	Male	2023-02-23	13.9	Carrefour_Fodéyah	[35,50)	1	primary	married	unemployed	soussou	access	access	access	no	no	no	no	(5,12]	0			7.08162	High SEP	13	negative
month9	7062	2013	Male	2023-02-23	11.4	Carrefour_Fodéyah	[35,50)	1	primary	married	unemployed	soussou	access	access	access	no	no	no	no	(5,12]	0			7.08175	High SEP	10	negative
month9	7065	2011	Female	2023-02-23	11.8	Layah	[35,50)	2	secondary	married	unemployed	soussou	access	access	access	no	no	no	yes	[3,5]	0			-2.08019	Middle SEP	12	negative
month9	7070	2011	Male	2023-02-23	12	Layah	[35,50)	2	no_formal_education	married	unemployed	soussou	notaccess	notaccess	notaccess	no	no	no	yes	(5,12]	0			-2.01029	Middle SEP	12	negative
month9	7071	2010	Male	2023-02-23	13.6	Layah	[35,50)	2	no_formal_education	married	unemployed	soussou	notaccess	notaccess	notaccess	no	no	no	yes	(5,12]	0			-2.01016	Middle SEP	13	negative
month9	7077	2013	Female	2023-02-23	10.4	Sarata	[50,77]	2	no_formal_education	married	agriculteur	autres	access	access	access	yes	yes	no	yes	(12,35]	0			-0.37647	Middle SEP	10	negative
month9	7078	2013	Female	2023-02-23	11.3	Sarata	[50,77]	2	no_formal_education	married	agriculteur	autres	access	access	access	yes	yes	no	yes	(12,35]	0			-0.376346	Middle SEP	10	negative
month9	7081	2010	Male	2023-02-23	13.1	Layah	[35,50)	2	no_formal_education	married	unemployed	soussou	access	access	notaccess	yes	yes	no	no	(5,12]	0			0.643027	High SEP	13	negative
month9	7098	2010	Male	2023-02-15	12.3	Olympio	[22,35)	2	primary	married	unemployed	autres	access	access	access	yes	yes	no	yes	(5,12]	0			-0.391305	Middle SEP	13	negative
month9	7108	2010	Male	2023-02-15	12.1	Olympio	[35,50)	2	secondary	married	commerçant	peulh	notaccess	access	notaccess	yes	yes	no	no	(5,12]	0			-1.12838	Middle SEP	13	negative
month9	7109	2013	Male	2023-02-15	12.1	Olympio	[35,50)	2	secondary	married	commerçant	peulh	notaccess	access	notaccess	yes	yes	no	no	(5,12]	0			-1.12825	Middle SEP	10	negative
month9	7112	2009	Female	2023-02-15	12	Olympio	[22,35)	2	primary	married	unemployed	peulh	notaccess	access	access	yes	yes	no	yes	[3,5]	0			-2.22735	Low SEP	14	negative
month9	7113	2010	Female	2023-02-15	10.6	Olympio	[22,35)	2	primary	married	unemployed	peulh	notaccess	access	access	yes	yes	no	yes	[3,5]	0			-2.22723	Low SEP	13	negative
month9	7116	2010	Male	2023-02-15	13.7	Olympio	[35,50)	2	no_formal_education	married	commerçant	peulh	notaccess	notaccess	notaccess	yes	no	no	yes	(5,12]	0			-2.94599	Low SEP	13	negative
month9	7117	2012	Female	2023-02-15	13.9	Olympio	[35,50)	2	no_formal_education	married	commerçant	peulh	notaccess	notaccess	notaccess	yes	no	no	yes	(5,12]	0			-2.94586	Low SEP	11	negative
month9	7131	2012	Female	2023-02-22	12.3	Loumafori	[50,77]	1	secondary	married	unemployed	soussou	notaccess	notaccess	notaccess	yes	yes	no	yes	(5,12]	0			0.331091	High SEP	11	negative
month9	7133	2010	Male	2023-02-24	11.7	Hafia	[22,35)	2	secondary	married	unemployed	autres	notaccess	access	access	yes	yes	no	yes	(5,12]	0			-2.60487	Low SEP	13	negative
month9	7136	2009	Female	2023-02-24	12.1	Hafia	[22,35)	2	secondary	married	unemployed	autres	notaccess	access	access	yes	yes	no	yes	(5,12]	0			-2.6045	Low SEP	14	negative
month9	7141	2009	Male	2023-02-22	10.7	Loumafori	[50,77]	1	no_formal_education	married	agriculteur	soussou	access	access	notaccess	yes	yes	no	yes	(5,12]	0			-2.92113	Low SEP	14	negative
month9	7142	2013	Male	2023-02-22	12	Loumafori	[50,77]	1	no_formal_education	married	agriculteur	soussou	access	access	notaccess	yes	yes	no	yes	(5,12]	0			-2.92101	Low SEP	10	negative
month9	7154	2010	Male	2023-02-22	11.9	Loumafori	[50,77]	1	secondary	married	unemployed	peulh	access	access	notaccess	yes	yes	no	yes	(12,35]	0			-3.47293	Low SEP	13	negative
month9	7162	2012	Female	2023-02-24	11.6	Hafia	[22,35)	2	secondary	married	fonctionnaire	peulh	notaccess	notaccess	notaccess	no	no	no	no	(5,12]	0			-1.86632	Middle SEP	11	negative
month9	7179	2009	Female	2023-02-22	11.7	Layah	[50,77]	2	no_formal_education	married	unemployed	soussou	notaccess	access	access	no	no	no	no	(5,12]	0			7.09634	High SEP	14	negative
month9	7180	2010	Female	2023-02-22	10.5	Layah	[50,77]	2	no_formal_education	married	unemployed	soussou	notaccess	access	access	no	no	no	no	(5,12]	0			7.09646	High SEP	13	negative
month9	7181	2010	Male	2023-02-21	12	Carrefour_Fodéyah	[50,77]	2	secondary	single	unemployed	peulh	access	access	access	yes	yes	no	yes	(5,12]	0			-2.78035	Low SEP	13	negative
month9	7183	2013	Male	2023-02-21	11.5	Carrefour_Fodéyah	[50,77]	2	secondary	single	unemployed	peulh	access	access	access	yes	yes	no	yes	(5,12]	0			-2.7801	Low SEP	10	negative
month9	7187	2010	Male	2023-02-22	15.16	Carrefour_Fodéyah	[22,35)	1	secondary	married	unemployed	soussou	notaccess	access	access	no	no	no	no	(5,12]	0			7.09734	High SEP	13	negative
month9	7194	2009	Female	2023-02-22	11.6	Carrefour_Fodéyah	[35,50)	1	primary	married	unemployed	soussou	access	access	access	no	no	no	yes	(12,35]	0			-0.226089	High SEP	14	negative
month9	7195	2009	Female	2023-02-22	13.1	Carrefour_Fodéyah	[35,50)	1	primary	married	unemployed	soussou	access	access	access	no	no	no	yes	(12,35]	0			-0.225965	High SEP	14	negative
month9	7196	2011	Male	2023-02-21	16.1	Carrefour_Fodéyah	[35,50)	1	secondary	married	unemployed	autres	access	access	access	yes	yes	no	yes	(12,35]	0			-2.39061	Low SEP	12	negative
month9	7199	2009	Male	2023-02-22	8.9	Carrefour_Fodéyah	[35,50)	1	secondary	married	unemployed	autres	access	access	access	yes	yes	no	yes	(12,35]	0			-2.39023	Low SEP	14	negative
month9	7200	2011	Male	2023-02-21	15.6	Foulawa	[50,77]	1	secondary	married	fonctionnaire	peulh	access	access	notaccess	yes	yes	no	yes	[3,5]	0			-2.40842	Low SEP	12	negative
month9	7202	2011	Male	2023-02-21	10.6	Foulawa	[50,77]	1	secondary	married	fonctionnaire	peulh	access	access	notaccess	yes	yes	no	yes	[3,5]	0			-2.40817	Low SEP	12	negative
month9	7215	2009	Male	2023-02-16	11.7	Olympio	[50,77]	1	secondary	married	agriculteur	soussou	access	access	notaccess	yes	yes	no	no	(12,35]	0			-1.31464	Middle SEP	14	negative
month9	7216	2012	Female	2023-02-16	12.5	Olympio	[50,77]	1	secondary	married	agriculteur	soussou	access	access	notaccess	yes	yes	no	no	(12,35]	0			-1.31451	Middle SEP	11	negative
month9	7217	2012	Male	2023-02-16	11.9	Olympio	[50,77]	1	secondary	married	agriculteur	soussou	access	access	notaccess	yes	yes	no	no	(12,35]	0			-1.31439	Middle SEP	11	negative
month9	7224	2010	Male	2023-02-17	13	Carrefour_Fodéyah	[22,35)	2	primary	married	unemployed	soussou	access	access	notaccess	no	no	no	no	(5,12]	0			7.10195	High SEP	13	negative
month9	7225	2012	Male	2023-02-17	12.1	Carrefour_Fodéyah	[22,35)	2	primary	married	unemployed	soussou	access	access	notaccess	no	no	no	no	(5,12]	9680	0	Pf	7.10208	High SEP	11	positive
month9	7228	2013	Female	2023-02-16	10.2	Olympio	[50,77]	1	secondary	married	agriculteur	soussou	access	access	notaccess	yes	yes	no	yes	(5,12]	0			-2.90328	Low SEP	10	negative
month9	7233	2013	Male	2023-02-17	12	Sarata	[22,35)	2	primary	married	unemployed	soussou	access	access	notaccess	no	no	no	no	(5,12]	0			7.10308	High SEP	10	negative
month9	7235	2009	Male	2023-02-16	14.6	Tanene	[22,35)	2	no_formal_education	married	commerçant	soussou	notaccess	access	notaccess	yes	yes	no	no	(12,35]	0			-2.11056	Middle SEP	14	negative
month9	7260	2009	Female	2023-02-14	10.2	Kimara	[22,35)	1	secondary	married	fonctionnaire	autres	notaccess	notaccess	notaccess	yes	yes	no	yes	(5,12]	0			-3.12052	Low SEP	14	negative
month9	7265	2009	Female	2023-02-13	10.9	Kimara	[35,50)	2	primary	married	unemployed	autres	access	access	access	yes	yes	no	yes	[3,5]	0			-3.13482	Low SEP	14	negative
month9	7266	2009	Female	2023-02-14	14.3	Kimara	[35,50)	1	primary	married	unemployed	autres	notaccess	access	notaccess	yes	yes	no	yes	[3,5]	0			0.0283716	High SEP	14	negative
month9	7273	2009	Male	2023-02-13	12	Kimara	[50,77]	2	primary	single	commerçant	autres	access	access	notaccess	yes	yes	no	yes	(5,12]	0			0.569268	High SEP	14	negative
month9	7274	2009	Male	2023-02-21	12.5	Sarata	[35,50)	2	secondary	single	commerçant	soussou	notaccess	notaccess	notaccess	yes	no	no	yes	(5,12]	0			-0.0685308	High SEP	14	negative
month9	7275	2012	Male	2023-02-21	11.8	Sarata	[35,50)	2	secondary	single	commerçant	soussou	notaccess	notaccess	notaccess	yes	no	no	yes	(5,12]	0			-0.0684061	High SEP	11	negative
month9	7277	2010	Female	2023-02-21	12.6	Sarata	[35,50)	2	secondary	single	commerçant	soussou	notaccess	notaccess	notaccess	yes	no	no	yes	(5,12]	0			-0.0681566	High SEP	13	negative
month9	7292	2010	Female	2023-02-21	11.1	Sarata	[50,77]	1	secondary	married	agriculteur	soussou	access	access	notaccess	no	no	no	yes	(5,12]	240	0	Pf	-0.242698	Middle SEP	13	positive
month9	7293	2013	Male	2023-02-21	12.1	Sarata	[35,50)	2	no_formal_education	married	commerçant	peulh	notaccess	notaccess	notaccess	no	no	no	no	(5,12]	0			7.11056	High SEP	10	negative
month9	7295	2013	Male	2023-02-20	14.2	Sarata	[35,50)	2	no_formal_education	married	commerçant	peulh	notaccess	notaccess	notaccess	no	no	no	no	(5,12]	0			7.11081	High SEP	10	negative
month9	7298	2010	Male	2023-02-20	11.1	Tanene	[22,35)	2	no_formal_education	married	commerçant	soussou	notaccess	access	notaccess	no	no	no	no	(5,12]	0			7.11118	High SEP	13	negative
month9	7299	2013	Male	2023-02-20	9.4	Tanene	[22,35)	2	no_formal_education	married	commerçant	soussou	notaccess	access	notaccess	no	no	no	no	(5,12]	0			7.11131	High SEP	10	negative
month9	7301	2013	Male	2023-02-20	14.1	Sarata	[50,77]	1	secondary	married	unemployed	soussou	access	access	access	yes	yes	no	no	(12,35]	1563	16	Pf + Gf	-0.937437	Middle SEP	10	positive
month9	7304	2010	Male	2023-02-22	13.1	Foulawa	[35,50)	1	secondary	married	fonctionnaire	peulh	notaccess	access	access	no	no	no	no	(5,12]	0			7.11193	High SEP	13	negative
month9	7315	2009	Female	2023-02-21	14.1	Sarata	[50,77]	1	no_formal_education	married	agriculteur	soussou	notaccess	notaccess	notaccess	no	no	no	no	(5,12]	0			7.1133	High SEP	14	negative
month9	7316	2010	Male	2023-02-21	12	Sarata	[50,77]	1	no_formal_education	married	agriculteur	soussou	notaccess	notaccess	notaccess	no	no	no	no	(5,12]	0			7.11343	High SEP	13	negative
month9	7317	2012	Male	2023-02-21	11.8	Sarata	[50,77]	1	no_formal_education	married	agriculteur	soussou	notaccess	notaccess	notaccess	no	no	no	no	(5,12]	0			7.11355	High SEP	11	negative
month9	7319	2013	Male	2023-02-20	10.2	Sarata	[35,50)	1	secondary	married	unemployed	peulh	access	access	access	yes	yes	yes	yes	[3,5]	0			-1.11041	Middle SEP	10	negative
month9	7323	2009	Male	2023-02-24	12.7	Layah	[35,50)	2	no_formal_education	married	commerçant	soussou	notaccess	notaccess	notaccess	yes	yes	no	yes	[3,5]	0			-0.669131	Middle SEP	14	negative
month9	7324	2011	Female	2023-02-24	10.3	Layah	[35,50)	2	no_formal_education	married	commerçant	soussou	notaccess	notaccess	notaccess	yes	yes	no	yes	[3,5]	0			-0.669006	Middle SEP	12	negative
month9	7327	2013	Male	2023-02-15	13.2	Maire_daouda	[35,50)	1	secondary	married	fonctionnaire	soussou	access	notaccess	access	no	no	no	yes	[3,5]	0			-0.985579	Middle SEP	10	negative
month9	7338	2010	Female	2023-02-16	12.1	Maire_daouda	[22,35)	2	secondary	married	unemployed	soussou	access	access	access	yes	yes	no	yes	(5,12]	0			-2.21693	Low SEP	13	negative
month9	7341	2013	Female	2023-02-24	9.9	Tanene	[35,50)	2	no_formal_education	married	commerçant	soussou	notaccess	access	notaccess	no	no	no	no	(5,12]	0			7.11655	High SEP	10	negative
month9	7344	2010	Female	2023-02-23	13	Layah	[35,50)	2	no_formal_education	married	commerçant	soussou	notaccess	notaccess	notaccess	yes	yes	no	yes	[3,5]	0			-0.666511	Middle SEP	13	negative
month9	7347	2010	Female	2023-02-23	11.6	Layah	[35,50)	2	no_formal_education	married	commerçant	soussou	notaccess	notaccess	notaccess	no	no	no	no	(5,12]	0			7.1173	High SEP	13	negative
month9	7372	2012	Female	2023-02-24	11.6	Hafia	[35,50)	2	no_formal_education	married	commerçant	peulh	access	access	access	no	no	no	no	(5,12]	0			-3.2721	Low SEP	11	negative
month9	7374	2010	Female	2023-02-24	11.4	Hafia	[35,50)	2	no_formal_education	married	commerçant	peulh	access	access	access	no	no	no	no	(5,12]	0			-3.27185	Low SEP	13	negative
month9	7379	2013	Male	2023-02-23	12	Layah	[22,35)	2	primary	single	unemployed	soussou	access	access	access	no	no	no	yes	[3,5]	0			0.350073	High SEP	10	negative
month9	7383	2009	Female	2023-02-27	13.1	Hafia	[50,77]	2	no_formal_education	single	commerçant	autres	notaccess	notaccess	notaccess	yes	yes	no	no	(5,12]	0			-0.716141	Middle SEP	14	negative
month1	7003	2005	Male	2022-03-07	13.4	Carrefour_Fodéyah	[50,77]	1	secondary	married	fonctionnaire	peulh	access	notaccess	notaccess	yes	yes	no	yes	[3,5]	0			-3.62032	Low SEP	17	negative
month1	7017	2007	Female	2022-03-07	14.4	Carrefour_Fodéyah	[50,77]	1	secondary	married	fonctionnaire	peulh	access	notaccess	notaccess	yes	yes	no	yes	[3,5]	0			-3.61857	Low SEP	15	negative
month1	7031	2003	Female	2022-03-08	13	Carrefour_Fodéyah	[35,50)	2	secondary	married	unemployed	peulh	notaccess	access	access	no	no	no	yes	[3,5]	0			-4.49309	Low SEP	19	negative
month1	7036	2004	Female	2022-03-08	11.5	Hafia	[22,35)	2	secondary	married	commerçant	peulh	notaccess	notaccess	access	yes	yes	no	yes	[3,5]	0			-2.2457	Low SEP	18	negative
month1	7042	2006	Female	2022-03-08	12.8	Foulawa	[50,77]	1	secondary	married	fonctionnaire	peulh	access	access	access	no	no	no	no	(5,12]	0			-4.26904	Low SEP	16	negative
month1	7060	2004	Male	2022-03-09	9.9	Carrefour_Fodéyah	[35,50)	1	primary	married	unemployed	soussou	access	access	access	no	no	no	no	(5,12]	0			7.0815	High SEP	18	negative
month1	7095	2005	Female	2022-03-10	14	Tanene	[22,35)	2	no_formal_education	married	unemployed	soussou	notaccess	notaccess	access	no	no	no	no	(5,12]	0			7.08586	High SEP	17	negative
month1	7104	2004	Female	2022-03-10	13.8	Sarata	[22,35)	2	no_formal_education	married	unemployed	soussou	notaccess	notaccess	access	no	no	no	no	(5,12]	288	0	Pf	7.08698	High SEP	18	positive
month1	7119	2004	Male	2022-03-11	14.6	Olympio	[35,50)	2	no_formal_education	married	commerçant	peulh	notaccess	notaccess	notaccess	yes	no	no	yes	(5,12]	0			-2.94561	Low SEP	18	negative
month1	7122	2003	Male	2022-03-11	10.6	Tanene	[22,35)	2	no_formal_education	married	unemployed	soussou	notaccess	notaccess	access	yes	yes	no	no	[3,5]	2391	0	Pf	-0.993709	Middle SEP	19	positive
month1	7135	2004	Male	2022-03-14	12.5	Hafia	[22,35)	2	secondary	married	unemployed	autres	notaccess	access	access	yes	yes	no	yes	(5,12]	0			-2.60462	Low SEP	18	negative
month1	7147	2006	Female	2022-03-14	13	Loumafori	[50,77]	1	secondary	married	unemployed	autres	access	access	access	yes	yes	no	yes	(12,35]	0			-2.52174	Low SEP	16	negative
month1	7148	2005	Male	2022-03-14	12.6	Loumafori	[50,77]	1	secondary	married	unemployed	autres	access	access	access	yes	yes	no	yes	(12,35]	0			-2.52162	Low SEP	17	negative
month1	7151	2007	Female	2022-03-14	11.8	Loumafori	[50,77]	1	secondary	married	unemployed	autres	access	access	access	yes	yes	no	yes	(12,35]	0			-2.52125	Low SEP	15	negative
month1	7152	2005	Female	2022-03-14	12.1	Loumafori	[50,77]	1	secondary	married	unemployed	autres	access	access	access	yes	yes	no	yes	(12,35]	0			-2.52112	Low SEP	17	negative
month1	7155	2006	Male	2022-03-14	11.7	Loumafori	[50,77]	1	secondary	married	unemployed	peulh	access	access	notaccess	yes	yes	no	yes	(12,35]	0			-3.47281	Low SEP	16	negative
month1	7157	2004	Male	2022-03-14	11	Loumafori	[50,77]	1	no_formal_education	married	unemployed	peulh	notaccess	access	notaccess	yes	no	no	yes	(5,12]	0			-0.879331	Middle SEP	18	negative
month1	7158	2005	Female	2022-03-14	12.3	Loumafori	[50,77]	1	no_formal_education	married	unemployed	peulh	notaccess	access	notaccess	yes	no	no	yes	(5,12]	135	0	Pf	-0.879206	Middle SEP	17	positive
month1	7159	2006	Female	2022-03-14	10.6	Loumafori	[50,77]	1	no_formal_education	married	unemployed	peulh	notaccess	access	notaccess	yes	no	no	yes	(5,12]	0			-0.879082	Middle SEP	16	negative
month1	7165	2005	Male	2022-03-15	12.8	Loumafori	[50,77]	1	secondary	married	unemployed	soussou	access	access	access	yes	yes	no	yes	(5,12]	0			-0.429527	Middle SEP	17	negative
month1	7170	2004	Female	2022-03-16	11.6	Layah	[35,50)	2	no_formal_education	married	commerçant	soussou	notaccess	notaccess	notaccess	no	no	no	no	(5,12]	0			7.09522	High SEP	18	negative
month1	7178	2004	Male	2022-03-16	13	Layah	[50,77]	2	no_formal_education	married	unemployed	soussou	notaccess	access	access	no	no	no	no	(5,12]	0			7.09622	High SEP	18	negative
month1	7182	2003	Male	2022-03-16	12.1	Carrefour_Fodéyah	[50,77]	2	secondary	single	unemployed	peulh	access	access	access	yes	yes	no	yes	(5,12]	0			-2.78022	Low SEP	19	negative
month1	7198	2006	Female	2022-03-16	10.5	Carrefour_Fodéyah	[35,50)	1	secondary	married	unemployed	autres	access	access	access	yes	yes	no	yes	(12,35]	0			-2.39036	Low SEP	16	negative
month1	7205	2006	Male	2022-03-17	17.2	Carrefour_Fodéyah	[22,35)	2	secondary	married	unemployed	soussou	notaccess	access	access	no	no	no	yes	[3,5]	0			-2.27019	Low SEP	16	negative
month1	7220	2006	Male	2022-03-17	12.8	Tanene	[35,50)	2	no_formal_education	married	commerçant	soussou	notaccess	access	notaccess	yes	yes	no	no	(5,12]	0			0.215648	High SEP	16	negative
month1	7284	2005	Female	2022-03-22	12.6	Sarata	[35,50)	2	secondary	single	commerçant	soussou	notaccess	notaccess	notaccess	yes	yes	no	yes	(12,35]	0			-0.579554	Middle SEP	17	negative
month1	7289	2003	Female	2022-03-22	12	Kimara	[50,77]	1	primary	married	agriculteur	soussou	access	access	access	yes	yes	no	no	(5,12]	170	0	Pf	-2.39661	Low SEP	19	positive
month1	7310	2006	Male	2022-03-22	12.9	Sarata	[35,50)	1	secondary	married	unemployed	peulh	access	access	access	yes	yes	yes	yes	[3,5]	0			-1.11153	Middle SEP	16	negative
month1	7314	2005	Female	2022-03-22	10.8	Olympio	[22,35)	2	primary	married	unemployed	peulh	notaccess	access	access	no	no	no	no	(5,12]	0			7.11318	High SEP	17	negative
month1	7328	2007	Female	2022-03-23	12.6	Maire_daouda	[35,50)	1	secondary	married	fonctionnaire	soussou	access	notaccess	access	no	no	no	yes	[3,5]	0			-0.985454	Middle SEP	15	negative
month1	7337	2007	Male	2022-03-23	12.5	Maire_daouda	[22,35)	2	secondary	married	unemployed	soussou	access	access	access	yes	yes	no	yes	(5,12]	0			-2.21705	Low SEP	15	negative
month1	7340	2004	Female	2022-03-24	14.4	Hafia	[22,35)	2	primary	married	commerçant	soussou	access	access	notaccess	yes	yes	no	no	(5,12]	0			-2.44867	Low SEP	18	negative
month1	7353	2007	Female	2022-03-24	10.5	Layah	[35,50)	2	secondary	married	fonctionnaire	soussou	access	access	notaccess	no	no	no	no	(5,12]	0			7.11804	High SEP	15	negative
month1	7361	2005	Female	2022-03-24	10.8	Hafia	[22,35)	2	secondary	married	unemployed	soussou	notaccess	access	access	no	no	no	yes	[3,5]	432	0	Pf	-1.12778	Middle SEP	17	positive
month1	7368	2003	Female	2022-03-24	11.6	Hafia	[22,35)	2	secondary	married	unemployed	soussou	notaccess	access	access	no	no	no	yes	[3,5]	0			-3.18271	Low SEP	19	negative
month1	7389	2006	Female	2022-03-25	13.7	Loumafori	[50,77]	1	no_formal_education	married	unemployed	peulh	notaccess	access	notaccess	yes	yes	no	no	(12,35]	0			-3.06552	Low SEP	16	negative
month1	7395	2007	Male	2022-03-25	12.8	Layah	[35,50)	2	no_formal_education	married	commerçant	soussou	notaccess	notaccess	notaccess	yes	yes	no	yes	(5,12]	500	32	Pf + Gf	-0.433272	Middle SEP	15	positive
month2	7011	2005	Female	2022-04-25	11.8	Foulawa	[50,77]	1	secondary	married	unemployed	peulh	notaccess	access	access	yes	yes	no	yes	(5,12]	0			-3.45209	Low SEP	17	negative
month2	7014	2003	Male	2022-04-25	11.5	Foulawa	[50,77]	1	no_formal_education	married	unemployed	peulh	access	access	notaccess	no	no	no	yes	(5,12]	192	0	Pf	-0.420052	Middle SEP	19	positive
month2	7017	2005	Female	2022-04-25	12.6	Carrefour_Fodéyah	[50,77]	1	secondary	married	fonctionnaire	peulh	access	notaccess	notaccess	yes	yes	no	yes	[3,5]	0			-3.61857	Low SEP	17	negative
month2	7020	2003	Male	2022-04-26	12.1	Foulawa	[35,50)	1	secondary	married	fonctionnaire	peulh	notaccess	access	access	yes	no	no	no	(5,12]	0			0.0819717	High SEP	19	negative
month2	7033	2005	Female	2022-04-25	11.4	Foulawa	[22,35)	2	secondary	married	fonctionnaire	peulh	notaccess	access	access	yes	yes	no	no	[3,5]	0			-0.377258	Middle SEP	17	negative
month2	7060	2004	Male	2022-04-29	8.4	Carrefour_Fodéyah	[35,50)	1	primary	married	unemployed	soussou	access	access	access	no	no	no	no	(5,12]	0			7.0815	High SEP	18	negative
month2	7095	2005	Female	2022-05-05	11.8	Tanene	[22,35)	2	no_formal_education	married	unemployed	soussou	notaccess	notaccess	access	no	no	no	no	(5,12]	0			7.08586	High SEP	17	negative
month2	7104	2004	Female	2022-05-04	13.3	Sarata	[22,35)	2	no_formal_education	married	unemployed	soussou	notaccess	notaccess	access	no	no	no	no	(5,12]	0			7.08698	High SEP	18	negative
month2	7119	2004	Male	2022-05-04	13.9	Olympio	[35,50)	2	no_formal_education	married	commerçant	peulh	notaccess	notaccess	notaccess	yes	no	no	yes	(5,12]	32	0	Pf	-2.94561	Low SEP	18	positive
month2	7122	2003	Male	2022-05-04	10.06	Tanene	[22,35)	2	no_formal_education	married	unemployed	soussou	notaccess	notaccess	access	yes	yes	no	no	[3,5]	0			-0.993709	Middle SEP	19	negative
month2	7135	2004	Male	2022-05-17	13	Hafia	[22,35)	2	secondary	married	unemployed	autres	notaccess	access	access	yes	yes	no	yes	(5,12]	0			-2.60462	Low SEP	18	negative
month2	7147	2006	Female	2022-05-06	12.9	Loumafori	[50,77]	1	secondary	married	unemployed	autres	access	access	access	yes	yes	no	yes	(12,35]	1408	0	Pf	-2.52174	Low SEP	16	positive
month2	7148	2005	Male	2022-05-06	12.7	Loumafori	[50,77]	1	secondary	married	unemployed	autres	access	access	access	yes	yes	no	yes	(12,35]	0			-2.52162	Low SEP	17	negative
month2	7151	2007	Female	2022-05-06	11.48	Loumafori	[50,77]	1	secondary	married	unemployed	autres	access	access	access	yes	yes	no	yes	(12,35]	0			-2.52125	Low SEP	15	negative
month2	7152	2005	Female	2022-05-06	12.1	Loumafori	[50,77]	1	secondary	married	unemployed	autres	access	access	access	yes	yes	no	yes	(12,35]	0			-2.52112	Low SEP	17	negative
month2	7155	2006	Male	2022-05-09	12.1	Loumafori	[50,77]	1	secondary	married	unemployed	peulh	access	access	notaccess	yes	yes	no	yes	(12,35]	0			-3.47281	Low SEP	16	negative
month2	7157	2004	Male	2022-05-16	11.6	Loumafori	[50,77]	1	no_formal_education	married	unemployed	peulh	notaccess	access	notaccess	yes	no	no	yes	(5,12]	0			-0.879331	Middle SEP	18	negative
month2	7158	2005	Female	2022-05-19	11.2	Loumafori	[50,77]	1	no_formal_education	married	unemployed	peulh	notaccess	access	notaccess	yes	no	no	yes	(5,12]	0			-0.879206	Middle SEP	17	negative
month2	7159	2006	Female	2022-05-16	11	Loumafori	[50,77]	1	no_formal_education	married	unemployed	peulh	notaccess	access	notaccess	yes	no	no	yes	(5,12]	0			-0.879082	Middle SEP	16	negative
month2	7165	2005	Male	2022-05-06	13	Loumafori	[50,77]	1	secondary	married	unemployed	soussou	access	access	access	yes	yes	no	yes	(5,12]	0			-0.429527	Middle SEP	17	negative
month2	7170	2004	Female	2022-05-11	12	Carrefour_Fodéyah	[35,50)	1	primary	married	unemployed	soussou	access	access	access	no	no	no	no	(5,12]	0			7.09522	High SEP	18	negative
month2	7178	2004	Male	2022-05-11	12.4	Layah	[50,77]	2	no_formal_education	married	unemployed	soussou	notaccess	access	access	no	no	no	no	(5,12]	0			7.09622	High SEP	18	negative
month2	7182	2003	Male	2022-05-11	11.6	Carrefour_Fodéyah	[50,77]	2	secondary	single	unemployed	peulh	access	access	access	yes	yes	no	yes	(5,12]	0			-2.78022	Low SEP	19	negative
month2	7198	2006	Female	2022-05-11	10.1	Carrefour_Fodéyah	[35,50)	1	secondary	married	unemployed	autres	access	access	access	yes	yes	no	yes	(12,35]	320	0	Pf	-2.39036	Low SEP	16	positive
month2	7205	2006	Male	2022-05-11	15.5	Carrefour_Fodéyah	[22,35)	2	secondary	married	unemployed	soussou	notaccess	access	access	no	no	no	yes	[3,5]	0			-2.27019	Low SEP	16	negative
month2	7220	2006	Male	2022-05-18	11	Tanene	[35,50)	2	no_formal_education	married	commerçant	soussou	notaccess	access	notaccess	yes	yes	no	no	(5,12]	0			0.215648	High SEP	16	negative
month2	7284	2005	Female	2022-05-17	12.5	Sarata	[35,50)	2	secondary	single	commerçant	soussou	notaccess	notaccess	notaccess	yes	yes	no	yes	(12,35]	0			-0.579554	Middle SEP	17	negative
month2	7289	2003	Female	2022-05-11	13.3	Kimara	[50,77]	1	primary	married	agriculteur	soussou	access	access	access	yes	yes	no	no	(5,12]	1728	0	Pf	-2.39661	Low SEP	19	positive
month2	7310	2006	Male	2022-05-13	12.8	Sarata	[35,50)	1	secondary	married	unemployed	peulh	access	access	access	yes	yes	yes	yes	[3,5]	0			-1.11153	Middle SEP	16	negative
month2	7314	2005	Female	2022-05-10	10.3	Olympio	[22,35)	2	primary	married	unemployed	peulh	notaccess	access	access	no	no	no	no	(5,12]	0			7.11318	High SEP	17	negative
month2	7337	2007	Male	2022-05-30	12.9	Maire_daouda	[22,35)	2	secondary	married	unemployed	soussou	access	access	access	yes	yes	no	yes	(5,12]	0			-2.21705	Low SEP	15	negative
month2	7340	2004	Female	2022-05-17	13.5	Hafia	[22,35)	2	primary	married	commerçant	soussou	access	access	notaccess	yes	yes	no	no	(5,12]	0			-2.44867	Low SEP	18	negative
month2	7353	2007	Female	2022-04-29	7.6	Layah	[35,50)	2	secondary	married	fonctionnaire	soussou	access	access	notaccess	no	no	no	no	(5,12]	0			7.11804	High SEP	15	negative
month2	7361	2005	Female	2022-05-16	12.5	Hafia	[22,35)	2	secondary	married	unemployed	soussou	notaccess	access	access	no	no	no	yes	[3,5]	0			-1.12778	Middle SEP	17	negative
month2	7368	2003	Female	2022-05-17	12.9	Hafia	[22,35)	2	secondary	married	unemployed	soussou	notaccess	access	access	no	no	no	yes	[3,5]	0			-3.18271	Low SEP	19	negative
month2	7389	2006	Female	2022-05-06	13.9	Loumafori	[50,77]	1	no_formal_education	married	unemployed	peulh	notaccess	access	notaccess	yes	yes	no	no	(12,35]	0			-3.06552	Low SEP	16	negative
month3	7004	2007	Female	2022-06-17	11.7	Foulawa	[35,50)	1	secondary	married	commerçant	peulh	access	access	notaccess	yes	yes	no	yes	(5,12]	0			-1.44827	Middle SEP	15	negative
month3	7012	2004	Female	2022-06-15	11.2	Foulawa	[50,77]	1	secondary	married	unemployed	peulh	notaccess	access	access	yes	yes	no	yes	(5,12]	0			-3.45196	Low SEP	18	negative
month3	7039	2003	Female	2022-06-16	12.1	Hafia	[22,35)	2	secondary	married	commerçant	peulh	notaccess	notaccess	access	yes	yes	no	yes	[3,5]	0			-2.24533	Low SEP	19	negative
month3	7060	2004	Male	2022-06-20	9.9	Carrefour_Fodéyah	[35,50)	1	primary	married	unemployed	soussou	access	access	access	no	no	no	no	(5,12]	0			7.0815	High SEP	18	negative
month3	7104	2004	Female	2022-06-29	13.9	Sarata	[22,35)	2	no_formal_education	married	unemployed	soussou	notaccess	notaccess	access	no	no	no	no	(5,12]	100	0	Pf	7.08698	High SEP	18	positive
month3	7119	2004	Male	2022-06-30	13.4	Olympio	[35,50)	2	no_formal_education	married	commerçant	peulh	notaccess	notaccess	notaccess	yes	no	no	yes	(5,12]	0			-2.94561	Low SEP	18	negative
month3	7122	2003	Male	2022-06-29	11.2	Tanene	[22,35)	2	no_formal_education	married	unemployed	soussou	notaccess	notaccess	access	yes	yes	no	no	[3,5]	2888	0	Pf	-0.993709	Middle SEP	19	positive
month3	7135	2004	Male	2022-06-27	11.6	Hafia	[22,35)	2	secondary	married	unemployed	autres	notaccess	access	access	yes	yes	no	yes	(5,12]	0			-2.60462	Low SEP	18	negative
month3	7147	2006	Female	2022-06-21	12.8	Loumafori	[50,77]	1	secondary	married	unemployed	autres	access	access	access	yes	yes	no	yes	(12,35]	0			-2.52174	Low SEP	16	negative
month3	7148	2005	Male	2022-06-21	13.2	Loumafori	[50,77]	1	secondary	married	unemployed	autres	access	access	access	yes	yes	no	yes	(12,35]	0			-2.52162	Low SEP	17	negative
month3	7151	2007	Female	2022-07-07	13	Loumafori	[50,77]	1	secondary	married	unemployed	autres	access	access	access	yes	yes	no	yes	(12,35]	0			-2.52125	Low SEP	15	negative
month3	7157	2004	Male	2022-06-24	10.6	Loumafori	[50,77]	1	no_formal_education	married	unemployed	peulh	notaccess	access	notaccess	yes	no	no	yes	(5,12]	0			-0.879331	Middle SEP	18	negative
month3	7158	2005	Female	2022-06-28	10.6	Loumafori	[50,77]	1	no_formal_education	married	unemployed	peulh	notaccess	access	notaccess	yes	no	no	yes	(5,12]	0			-0.879206	Middle SEP	17	negative
month3	7159	2006	Female	2022-06-27	11.8	Loumafori	[50,77]	1	no_formal_education	married	unemployed	peulh	notaccess	access	notaccess	yes	no	no	yes	(5,12]	0			-0.879082	Middle SEP	16	negative
month3	7165	2005	Male	2022-06-23	12.6	Loumafori	[50,77]	1	secondary	married	unemployed	soussou	access	access	access	yes	yes	no	yes	(5,12]	0			-0.429527	Middle SEP	17	negative
month3	7170	2004	Female	2022-06-23	11.9	Carrefour_Fodéyah	[35,50)	1	primary	married	unemployed	soussou	access	access	access	no	no	no	no	(5,12]	0			7.09522	High SEP	18	negative
month3	7178	2004	Male	2022-06-23	13	Layah	[50,77]	2	no_formal_education	married	unemployed	soussou	notaccess	access	access	no	no	no	no	(5,12]	0			7.09622	High SEP	18	negative
month3	7182	2003	Male	2022-06-15	10.9	Carrefour_Fodéyah	[50,77]	2	secondary	single	unemployed	peulh	access	access	access	yes	yes	no	yes	(5,12]	0			-2.78022	Low SEP	19	negative
month3	7198	2006	Female	2022-06-20	11.5	Carrefour_Fodéyah	[35,50)	1	secondary	married	unemployed	autres	access	access	access	yes	yes	no	yes	(12,35]	1083	0	Pf	-2.39036	Low SEP	16	positive
month3	7205	2006	Male	2022-06-23	15.4	Carrefour_Fodéyah	[22,35)	2	secondary	married	unemployed	soussou	notaccess	access	access	no	no	no	yes	[3,5]	0			-2.27019	Low SEP	16	negative
month3	7220	2006	Male	2022-07-04	12.7	Tanene	[35,50)	2	no_formal_education	married	commerçant	soussou	notaccess	access	notaccess	yes	yes	no	no	(5,12]	0			0.215648	High SEP	16	negative
month3	7284	2005	Female	2022-06-24	11.3	Sarata	[35,50)	2	secondary	single	commerçant	soussou	notaccess	notaccess	notaccess	yes	yes	no	yes	(12,35]	0			-0.579554	Middle SEP	17	negative
month3	7289	2003	Female	2022-06-30	12.9	Kimara	[50,77]	1	primary	married	agriculteur	soussou	access	access	access	yes	yes	no	no	(5,12]	3418	0	Pf	-2.39661	Low SEP	19	positive
month3	7310	2006	Male	2022-06-27	11.4	Sarata	[35,50)	1	secondary	married	unemployed	peulh	access	access	access	yes	yes	yes	yes	[3,5]	0			-1.11153	Middle SEP	16	negative
month3	7337	2007	Male	2022-07-04	10.7	Maire_daouda	[22,35)	2	secondary	married	unemployed	soussou	access	access	access	yes	yes	no	yes	(5,12]	0			-2.21705	Low SEP	15	negative
month3	7340	2004	Female	2022-06-27	13.1	Hafia	[22,35)	2	primary	married	commerçant	soussou	access	access	notaccess	yes	yes	no	no	(5,12]	0			-2.44867	Low SEP	18	negative
month3	7353	2007	Female	2022-06-20	7.5	Layah	[35,50)	2	secondary	married	fonctionnaire	soussou	access	access	notaccess	no	no	no	no	(5,12]	0			7.11804	High SEP	15	negative
month3	7361	2005	Female	2022-06-30	12.2	Hafia	[22,35)	2	secondary	married	unemployed	soussou	notaccess	access	access	no	no	no	yes	[3,5]	0			-1.12778	Middle SEP	17	negative
month3	7368	2003	Female	2022-06-27	13.8	Hafia	[22,35)	2	secondary	married	unemployed	soussou	notaccess	access	access	no	no	no	yes	[3,5]	0			-3.18271	Low SEP	19	negative
month3	7389	2006	Female	2022-06-21	14	Loumafori	[50,77]	1	no_formal_education	married	unemployed	peulh	notaccess	access	notaccess	yes	yes	no	no	(12,35]	0			-3.06552	Low SEP	16	negative
month4	7007	2004	Male	2022-08-01	12.7	Foulawa	[35,50)	1	secondary	married	commerçant	peulh	access	access	notaccess	yes	yes	no	yes	(5,12]	0			-1.44789	Middle SEP	18	negative
month4	7015	2004	Male	2022-08-01	10.7	Foulawa	[50,77]	1	no_formal_education	married	unemployed	peulh	access	access	notaccess	no	no	no	yes	(5,12]	0			-0.419928	Middle SEP	18	negative
month4	7038	2005	Female	2022-08-01	9.7	Hafia	[22,35)	2	secondary	married	commerçant	peulh	notaccess	notaccess	access	yes	yes	no	yes	[3,5]	0			-2.24545	Low SEP	17	negative
month4	7043	2007	Female	2022-08-12	11.7	Layah	[22,35)	2	secondary	single	unemployed	soussou	access	access	access	yes	yes	no	yes	(5,12]	0			0.872961	High SEP	15	negative
month4	7060	2004	Male	2022-08-12	8.4	Carrefour_Fodéyah	[35,50)	1	primary	married	unemployed	soussou	access	access	access	no	no	no	no	(5,12]	0			7.0815	High SEP	18	negative
month4	7095	2005	Female	2022-08-17	12.5	Tanene	[22,35)	2	no_formal_education	married	unemployed	soussou	notaccess	notaccess	access	no	no	no	no	(5,12]	0	8	Gf	7.08586	High SEP	17	negative
month4	7104	2004	Female	2022-08-03	10.6	Sarata	[22,35)	2	no_formal_education	married	unemployed	soussou	notaccess	notaccess	access	no	no	no	no	(5,12]	0			7.08698	High SEP	18	negative
month4	7119	2004	Male	2022-08-03	13.3	Olympio	[35,50)	2	no_formal_education	married	commerçant	peulh	notaccess	notaccess	notaccess	yes	no	no	yes	(5,12]	0			-2.94561	Low SEP	18	negative
month4	7122	2003	Male	2022-08-03	11.2	Tanene	[22,35)	2	no_formal_education	married	unemployed	soussou	notaccess	notaccess	access	yes	yes	no	no	[3,5]	0			-0.993709	Middle SEP	19	negative
month4	7135	2004	Male	2022-08-18	13.4	Hafia	[22,35)	2	secondary	married	unemployed	autres	notaccess	access	access	yes	yes	no	yes	(5,12]	0			-2.60462	Low SEP	18	negative
month4	7147	2006	Female	2022-08-16	14.3	Loumafori	[50,77]	1	secondary	married	unemployed	autres	access	access	access	yes	yes	no	yes	(12,35]	0			-2.52174	Low SEP	16	negative
month4	7148	2005	Male	2022-08-17	10.9	Loumafori	[50,77]	1	secondary	married	unemployed	autres	access	access	access	yes	yes	no	yes	(12,35]	0			-2.52162	Low SEP	17	negative
month4	7151	2007	Female	2022-08-17	12.6	Loumafori	[50,77]	1	secondary	married	unemployed	autres	access	access	access	yes	yes	no	yes	(12,35]	0			-2.52125	Low SEP	15	negative
month4	7152	2005	Female	2022-08-16	11.3	Loumafori	[50,77]	1	secondary	married	unemployed	autres	access	access	access	yes	yes	no	yes	(12,35]	0			-2.52112	Low SEP	17	negative
month4	7158	2005	Female	2022-08-17	12.7	Loumafori	[50,77]	1	no_formal_education	married	unemployed	peulh	notaccess	access	notaccess	yes	no	no	yes	(5,12]	0			-0.879206	Middle SEP	17	negative
month4	7159	2006	Female	2022-08-17	10.8	Loumafori	[50,77]	1	no_formal_education	married	unemployed	peulh	notaccess	access	notaccess	yes	no	no	yes	(5,12]	0			-0.879082	Middle SEP	16	negative
month4	7165	2005	Male	2022-08-16	13.1	Loumafori	[50,77]	1	secondary	married	unemployed	soussou	access	access	access	yes	yes	no	yes	(5,12]	0			-0.429527	Middle SEP	17	negative
month4	7170	2004	Female	2022-08-10	11.1	Tanene	[35,50)	2	no_formal_education	married	commerçant	soussou	notaccess	notaccess	notaccess	no	no	no	no	(5,12]	0			7.09522	High SEP	18	negative
month4	7178	2004	Male	2022-08-10	13.7	Layah	[50,77]	2	no_formal_education	married	unemployed	soussou	notaccess	access	access	no	no	no	no	(5,12]	0			7.09622	High SEP	18	negative
month4	7182	2003	Male	2022-08-10	13.8	Carrefour_Fodéyah	[50,77]	2	secondary	single	unemployed	peulh	access	access	access	yes	yes	no	yes	(5,12]	0			-2.78022	Low SEP	19	negative
month4	7198	2006	Female	2022-08-10	10.4	Carrefour_Fodéyah	[35,50)	1	secondary	married	unemployed	autres	access	access	access	yes	yes	no	yes	(12,35]	0			-2.39036	Low SEP	16	negative
month4	7205	2006	Male	2022-08-05	17.5	Carrefour_Fodéyah	[22,35)	2	secondary	married	unemployed	soussou	notaccess	access	access	no	no	no	yes	[3,5]	0			-2.27019	Low SEP	16	negative
month4	7220	2006	Male	2022-08-04	12.9	Tanene	[35,50)	2	no_formal_education	married	commerçant	soussou	notaccess	access	notaccess	yes	yes	no	no	(5,12]	0			0.215648	High SEP	16	negative
month4	7284	2005	Female	2022-08-09	10.3	Sarata	[35,50)	2	secondary	single	commerçant	soussou	notaccess	notaccess	notaccess	yes	yes	no	yes	(12,35]	0			-0.579554	Middle SEP	17	negative
month4	7289	2003	Female	2022-08-01	13.7	Kimara	[50,77]	1	primary	married	agriculteur	soussou	access	access	access	yes	yes	no	no	(5,12]	0			-2.39661	Low SEP	19	negative
month4	7310	2006	Male	2022-08-09	12.4	Sarata	[35,50)	1	secondary	married	unemployed	peulh	access	access	access	yes	yes	yes	yes	[3,5]	0			-1.11153	Middle SEP	16	negative
month4	7314	2005	Female	2022-08-03	9.4	Olympio	[22,35)	2	primary	married	unemployed	peulh	notaccess	access	access	no	no	no	no	(5,12]	0			7.11318	High SEP	17	negative
month4	7337	2007	Male	2022-08-08	13.1	Maire_daouda	[22,35)	2	secondary	married	unemployed	soussou	access	access	access	yes	yes	no	yes	(5,12]	0			-2.21705	Low SEP	15	negative
month4	7340	2004	Female	2022-08-18	12	Hafia	[22,35)	2	primary	married	commerçant	soussou	access	access	notaccess	yes	yes	no	no	(5,12]	0			-2.44867	Low SEP	18	negative
month4	7353	2007	Female	2022-08-12	9.6	Layah	[35,50)	2	secondary	married	fonctionnaire	soussou	access	access	notaccess	no	no	no	no	(5,12]	0			7.11804	High SEP	15	negative
month4	7361	2005	Female	2022-08-17	12.1	Hafia	[22,35)	2	secondary	married	unemployed	soussou	notaccess	access	access	no	no	no	yes	[3,5]	0			-1.12778	Middle SEP	17	negative
month4	7389	2006	Female	2022-08-16	12.3	Loumafori	[50,77]	1	no_formal_education	married	unemployed	peulh	notaccess	access	notaccess	yes	yes	no	no	(12,35]	0			-3.06552	Low SEP	16	negative
month5	7004	2004	Female	2022-09-06	11.3	Foulawa	[35,50)	1	secondary	married	commerçant	peulh	access	access	notaccess	yes	yes	no	yes	(5,12]	0			-1.44827	Middle SEP	18	negative
month5	7017	2006	Male	2022-09-05	12.7	Carrefour_Fodéyah	[50,77]	1	secondary	married	fonctionnaire	peulh	access	notaccess	notaccess	yes	yes	no	yes	[3,5]	0			-3.61857	Low SEP	16	negative
month5	7018	2005	Male	2022-09-05	13.9	Carrefour_Fodéyah	[50,77]	1	secondary	married	fonctionnaire	peulh	access	notaccess	notaccess	yes	yes	no	yes	[3,5]	0			-3.61844	Low SEP	17	negative
month5	7022	2006	Male	2022-09-05	12.8	Foulawa	[50,77]	1	no_formal_education	married	agriculteur	peulh	notaccess	notaccess	notaccess	no	no	no	no	(5,12]	0			7.07676	High SEP	16	negative
month5	7037	2007	Female	2022-09-05	13.8	Hafia	[22,35)	2	secondary	married	commerçant	peulh	notaccess	notaccess	access	yes	yes	no	yes	[3,5]	0			-2.24557	Low SEP	15	negative
month5	7060	2004	Male	2022-09-19	12.6	Carrefour_Fodéyah	[35,50)	1	primary	married	unemployed	soussou	access	access	access	no	no	no	no	(5,12]	5525	0	Pf	7.0815	High SEP	18	positive
month5	7095	2005	Female	2022-09-07	12.9	Tanene	[22,35)	2	no_formal_education	married	unemployed	soussou	notaccess	notaccess	access	no	no	no	no	(5,12]	0			7.08586	High SEP	17	negative
month5	7104	2004	Female	2022-09-07	12.8	Sarata	[22,35)	2	no_formal_education	married	unemployed	soussou	notaccess	notaccess	access	no	no	no	no	(5,12]	0			7.08698	High SEP	18	negative
month5	7119	2004	Male	2022-09-07	13.2	Olympio	[35,50)	2	no_formal_education	married	commerçant	peulh	notaccess	notaccess	notaccess	yes	no	no	yes	(5,12]	0			-2.94561	Low SEP	18	negative
month5	7122	2003	Male	2022-09-07	10.9	Tanene	[22,35)	2	no_formal_education	married	unemployed	soussou	notaccess	notaccess	access	yes	yes	no	no	[3,5]	0			-0.993709	Middle SEP	19	negative
month5	7135	2004	Male	2022-09-21	12	Hafia	[22,35)	2	secondary	married	unemployed	autres	notaccess	access	access	yes	yes	no	yes	(5,12]	0			-2.60462	Low SEP	18	negative
month5	7147	2006	Female	2022-09-13	14.1	Loumafori	[50,77]	1	secondary	married	unemployed	autres	access	access	access	yes	yes	no	yes	(12,35]	0			-2.52174	Low SEP	16	negative
month5	7148	2005	Male	2022-09-13	14.1	Loumafori	[50,77]	1	secondary	married	unemployed	autres	access	access	access	yes	yes	no	yes	(12,35]	0			-2.52162	Low SEP	17	negative
month5	7151	2007	Female	2022-09-13	13.9	Loumafori	[50,77]	1	secondary	married	unemployed	autres	access	access	access	yes	yes	no	yes	(12,35]	0			-2.52125	Low SEP	15	negative
month5	7152	2005	Female	2022-09-13	11.1	Loumafori	[50,77]	1	secondary	married	unemployed	autres	access	access	access	yes	yes	no	yes	(12,35]	0			-2.52112	Low SEP	17	negative
month5	7158	2005	Female	2022-09-21	12.8	Loumafori	[50,77]	1	no_formal_education	married	unemployed	peulh	notaccess	access	notaccess	yes	no	no	yes	(5,12]	0			-0.879206	Middle SEP	17	negative
month5	7159	2006	Female	2022-09-21	11.2	Loumafori	[50,77]	1	no_formal_education	married	unemployed	peulh	notaccess	access	notaccess	yes	no	no	yes	(5,12]	0			-0.879082	Middle SEP	16	negative
month5	7165	2005	Male	2022-09-13	13.6	Loumafori	[50,77]	1	secondary	married	unemployed	soussou	access	access	access	yes	yes	no	yes	(5,12]	0			-0.429527	Middle SEP	17	negative
month5	7170	2004	Female	2022-09-22	12.3	Layah	[35,50)	2	no_formal_education	married	commerçant	soussou	notaccess	notaccess	notaccess	no	no	no	no	(5,12]	0			7.09522	High SEP	18	negative
month5	7178	2004	Male	2022-09-22	13.4	Layah	[50,77]	2	no_formal_education	married	unemployed	soussou	notaccess	access	access	no	no	no	no	(5,12]	0			7.09622	High SEP	18	negative
month5	7182	2003	Male	2022-09-22	12.3	Carrefour_Fodéyah	[50,77]	2	secondary	single	unemployed	peulh	access	access	access	yes	yes	no	yes	(5,12]	0			-2.78022	Low SEP	19	negative
month5	7198	2006	Female	2022-09-22	12.3	Carrefour_Fodéyah	[35,50)	1	secondary	married	unemployed	autres	access	access	access	yes	yes	no	yes	(12,35]	0			-2.39036	Low SEP	16	negative
month5	7205	2006	Male	2022-09-22	15.2	Carrefour_Fodéyah	[22,35)	2	secondary	married	unemployed	soussou	notaccess	access	access	no	no	no	yes	[3,5]	0			-2.27019	Low SEP	16	negative
month5	7220	2006	Male	2022-09-07	10.9	Tanene	[35,50)	2	no_formal_education	married	commerçant	soussou	notaccess	access	notaccess	yes	yes	no	no	(5,12]	2500	0	Pf	0.215648	High SEP	16	positive
month5	7284	2005	Female	2022-09-12	12.8	Sarata	[35,50)	2	secondary	single	commerçant	soussou	notaccess	notaccess	notaccess	yes	yes	no	yes	(12,35]	0			-0.579554	Middle SEP	17	negative
month5	7310	2006	Male	2022-09-09	10.7	Sarata	[35,50)	1	secondary	married	unemployed	peulh	access	access	access	yes	yes	yes	yes	[3,5]	0			-1.11153	Middle SEP	16	negative
month5	7314	2005	Female	2022-09-05	11.1	Olympio	[22,35)	2	primary	married	unemployed	peulh	notaccess	access	access	no	no	no	no	(5,12]	0			7.11318	High SEP	17	negative
month5	7328	2007	Female	2022-09-09	11.7	Maire_daouda	[35,50)	1	secondary	married	fonctionnaire	soussou	access	notaccess	access	no	no	no	yes	[3,5]	0			-0.985454	Middle SEP	15	negative
month5	7337	2007	Male	2022-09-09	13.3	Maire_daouda	[22,35)	2	secondary	married	unemployed	soussou	access	access	access	yes	yes	no	yes	(5,12]	0			-2.21705	Low SEP	15	negative
month5	7340	2004	Female	2022-09-21	13.2	Hafia	[22,35)	2	primary	married	commerçant	soussou	access	access	notaccess	yes	yes	no	no	(5,12]	0			-2.44867	Low SEP	18	negative
month5	7353	2007	Female	2022-09-13	9.5	Layah	[35,50)	2	secondary	married	fonctionnaire	soussou	access	access	notaccess	no	no	no	no	(5,12]	0			7.11804	High SEP	15	negative
month5	7361	2005	Female	2022-09-20	12.1	Hafia	[22,35)	2	secondary	married	unemployed	soussou	notaccess	access	access	no	no	no	yes	[3,5]	0			-1.12778	Middle SEP	17	negative
month5	7368	2003	Female	2022-09-21	13.2	Hafia	[22,35)	2	secondary	married	unemployed	soussou	notaccess	access	access	no	no	no	yes	[3,5]	0			-3.18271	Low SEP	19	negative
month5	7389	2006	Female	2022-09-13	13	Loumafori	[50,77]	1	no_formal_education	married	unemployed	peulh	notaccess	access	notaccess	yes	yes	no	no	(12,35]	0			-3.06552	Low SEP	16	negative
month6	7001	2003	Female	2022-10-26	14.8	Foulawa	[35,50)	1	secondary	married	fonctionnaire	peulh	notaccess	access	access	no	no	no	yes	(12,35]	0			-2.4773	Low SEP	19	negative
month6	7016	2006	Female	2022-10-24	13	Foulawa	[50,77]	1	no_formal_education	married	unemployed	peulh	access	access	notaccess	no	no	no	yes	(5,12]	0			-0.419803	Middle SEP	16	negative
month6	7030	2005	Female	2022-10-25	16.5	Foulawa	[50,77]	1	secondary	married	fonctionnaire	peulh	access	access	access	no	no	no	no	(5,12]	0			-4.27054	Low SEP	17	negative
month6	7060	2004	Male	2022-11-07	8.3	Carrefour_Fodéyah	[35,50)	1	primary	married	unemployed	soussou	access	access	access	no	no	no	no	(5,12]	0			7.0815	High SEP	18	negative
month6	7095	2005	Female	2022-10-28	11.7	Tanene	[22,35)	2	no_formal_education	married	unemployed	soussou	notaccess	notaccess	access	no	no	no	no	(5,12]	0			7.08586	High SEP	17	negative
month6	7104	2004	Female	2022-10-28	13.7	Sarata	[22,35)	2	no_formal_education	married	unemployed	soussou	notaccess	notaccess	access	no	no	no	no	(5,12]	0			7.08698	High SEP	18	negative
month6	7119	2004	Male	2022-10-31	13.1	Olympio	[35,50)	2	no_formal_education	married	commerçant	peulh	notaccess	notaccess	notaccess	yes	no	no	yes	(5,12]	0			-2.94561	Low SEP	18	negative
month6	7122	2003	Male	2022-10-28	11	Tanene	[22,35)	2	no_formal_education	married	unemployed	soussou	notaccess	notaccess	access	yes	yes	no	no	[3,5]	0			-0.993709	Middle SEP	19	negative
month6	7135	2004	Male	2022-11-10	12.9	Hafia	[22,35)	2	secondary	married	unemployed	autres	notaccess	access	access	yes	yes	no	yes	(5,12]	0			-2.60462	Low SEP	18	negative
month6	7147	2006	Female	2022-11-08	14.4	Loumafori	[50,77]	1	secondary	married	unemployed	autres	access	access	access	yes	yes	no	yes	(12,35]	0			-2.52174	Low SEP	16	negative
month6	7148	2005	Male	2022-11-11	13	Loumafori	[50,77]	1	secondary	married	unemployed	autres	access	access	access	yes	yes	no	yes	(12,35]	0			-2.52162	Low SEP	17	negative
month6	7151	2007	Female	2022-11-09	13	Loumafori	[50,77]	1	secondary	married	unemployed	autres	access	access	access	yes	yes	no	yes	(12,35]	0			-2.52125	Low SEP	15	negative
month6	7155	2006	Male	2022-11-08	12.3	Loumafori	[50,77]	1	secondary	married	unemployed	peulh	access	access	notaccess	yes	yes	no	yes	(12,35]	0			-3.47281	Low SEP	16	negative
month6	7157	2004	Male	2022-11-10	11.5	Loumafori	[50,77]	1	no_formal_education	married	unemployed	peulh	notaccess	access	notaccess	yes	no	no	yes	(5,12]	0			-0.879331	Middle SEP	18	negative
month6	7165	2005	Male	2022-11-09	14.3	Loumafori	[50,77]	1	secondary	married	unemployed	soussou	access	access	access	yes	yes	no	yes	(5,12]	0			-0.429527	Middle SEP	17	negative
month6	7170	2004	Female	2022-11-11	12	Hafia	[35,50)	1	secondary	married	commerçant	soussou	notaccess	notaccess	notaccess	no	no	no	no	(5,12]	0			7.09522	High SEP	18	negative
month6	7178	2004	Male	2022-11-11	12.7	Layah	[50,77]	2	no_formal_education	married	unemployed	soussou	notaccess	access	access	no	no	no	no	(5,12]	0			7.09622	High SEP	18	negative
month6	7182	2003	Male	2022-11-14	11.7	Carrefour_Fodéyah	[50,77]	2	secondary	single	unemployed	peulh	access	access	access	yes	yes	no	yes	(5,12]	0			-2.78022	Low SEP	19	negative
month6	7198	2006	Female	2022-11-11	10.6	Carrefour_Fodéyah	[35,50)	1	secondary	married	unemployed	autres	access	access	access	yes	yes	no	yes	(12,35]	0			-2.39036	Low SEP	16	negative
month6	7205	2006	Male	2022-11-15	17.5	Carrefour_Fodéyah	[22,35)	2	secondary	married	unemployed	soussou	notaccess	access	access	no	no	no	yes	[3,5]	0			-2.27019	Low SEP	16	negative
month6	7220	2006	Male	2022-11-01	11.5	Tanene	[35,50)	2	no_formal_education	married	commerçant	soussou	notaccess	access	notaccess	yes	yes	no	no	(5,12]	0			0.215648	High SEP	16	negative
month6	7284	2005	Female	2022-11-03	11.3	Sarata	[35,50)	2	secondary	single	commerçant	soussou	notaccess	notaccess	notaccess	yes	yes	no	yes	(12,35]	0			-0.579554	Middle SEP	17	negative
month6	7310	2006	Male	2022-11-03	13	Sarata	[35,50)	1	secondary	married	unemployed	peulh	access	access	access	yes	yes	yes	yes	[3,5]	0			-1.11153	Middle SEP	16	negative
month6	7328	2007	Female	2022-11-02	13	Maire_daouda	[35,50)	1	secondary	married	fonctionnaire	soussou	access	notaccess	access	no	no	no	yes	[3,5]	0			-0.985454	Middle SEP	15	negative
month6	7340	2004	Female	2022-11-10	11.8	Hafia	[22,35)	2	primary	married	commerçant	soussou	access	access	notaccess	yes	yes	no	no	(5,12]	0			-2.44867	Low SEP	18	negative
month6	7353	2007	Female	2022-11-07	7.4	Layah	[35,50)	2	secondary	married	fonctionnaire	soussou	access	access	notaccess	no	no	no	no	(5,12]	0			7.11804	High SEP	15	negative
month6	7361	2005	Female	2022-11-10	12.7	Hafia	[22,35)	2	secondary	married	unemployed	soussou	notaccess	access	access	no	no	no	yes	[3,5]	0			-1.12778	Middle SEP	17	negative
month6	7368	2003	Female	2022-11-11	12.06	Hafia	[22,35)	2	secondary	married	unemployed	soussou	notaccess	access	access	no	no	no	yes	[3,5]	0			-3.18271	Low SEP	19	negative
month6	7389	2006	Female	2022-11-08	13.6	Loumafori	[50,77]	1	no_formal_education	married	unemployed	peulh	notaccess	access	notaccess	yes	yes	no	no	(12,35]	0			-3.06552	Low SEP	16	negative
month7	7016	2005	Male	2022-12-14	13.1	Foulawa	[50,77]	1	no_formal_education	married	unemployed	peulh	access	access	notaccess	no	no	no	yes	(5,12]	0			-0.419803	Middle SEP	17	negative
month7	7017	2004	Male	2022-12-15	12.6	Carrefour_Fodéyah	[50,77]	1	secondary	married	fonctionnaire	peulh	access	notaccess	notaccess	yes	yes	no	yes	[3,5]	0			-3.61857	Low SEP	18	negative
month7	7042	2007	Male	2022-12-17	13.4	Foulawa	[50,77]	1	secondary	married	fonctionnaire	peulh	access	access	access	no	no	no	no	(5,12]	0			-4.26904	Low SEP	15	negative
month7	7060	2004	Male	2022-12-23	12.8	Carrefour_Fodéyah	[35,50)	1	primary	married	unemployed	soussou	access	access	access	no	no	no	no	(5,12]	0			7.0815	High SEP	18	negative
month7	7095	2005	Female	2022-12-16	11.9	Tanene	[22,35)	2	no_formal_education	married	unemployed	soussou	notaccess	notaccess	access	no	no	no	no	(5,12]	0			7.08586	High SEP	17	negative
month7	7104	2004	Female	2022-12-16	11.6	Sarata	[22,35)	2	no_formal_education	married	unemployed	soussou	notaccess	notaccess	access	no	no	no	no	(5,12]	0			7.08698	High SEP	18	negative
month7	7119	2004	Male	2022-12-16	14.5	Olympio	[35,50)	2	no_formal_education	married	commerçant	peulh	notaccess	notaccess	notaccess	yes	no	no	yes	(5,12]	0			-2.94561	Low SEP	18	negative
month7	7122	2003	Male	2022-12-16	12.1	Tanene	[22,35)	2	no_formal_education	married	unemployed	soussou	notaccess	notaccess	access	yes	yes	no	no	[3,5]	0			-0.993709	Middle SEP	19	negative
month7	7135	2004	Male	2022-12-23	10.5	Hafia	[22,35)	2	secondary	married	unemployed	autres	notaccess	access	access	yes	yes	no	yes	(5,12]	0			-2.60462	Low SEP	18	negative
month7	7147	2006	Female	2022-12-27	13.8	Loumafori	[50,77]	1	secondary	married	unemployed	autres	access	access	access	yes	yes	no	yes	(12,35]	96	0	Pf	-2.52174	Low SEP	16	positive
month7	7148	2005	Male	2022-12-27	12.3	Loumafori	[50,77]	1	secondary	married	unemployed	autres	access	access	access	yes	yes	no	yes	(12,35]	0			-2.52162	Low SEP	17	negative
month7	7151	2007	Female	2022-12-27	12.3	Loumafori	[50,77]	1	secondary	married	unemployed	autres	access	access	access	yes	yes	no	yes	(12,35]	0			-2.52125	Low SEP	15	negative
month7	7152	2005	Female	2022-12-27	11.2	Loumafori	[50,77]	1	secondary	married	unemployed	autres	access	access	access	yes	yes	no	yes	(12,35]	0			-2.52112	Low SEP	17	negative
month7	7155	2006	Male	2022-12-27	12	Loumafori	[50,77]	1	secondary	married	unemployed	peulh	access	access	notaccess	yes	yes	no	yes	(12,35]	0			-3.47281	Low SEP	16	negative
month7	7157	2004	Male	2022-12-23	12.3	Loumafori	[50,77]	1	no_formal_education	married	unemployed	peulh	notaccess	access	notaccess	yes	no	no	yes	(5,12]	0			-0.879331	Middle SEP	18	negative
month7	7158	2005	Female	2022-12-23	10.6	Loumafori	[50,77]	1	no_formal_education	married	unemployed	peulh	notaccess	access	notaccess	yes	no	no	yes	(5,12]	40000	0	Pf	-0.879206	Middle SEP	17	positive
month7	7159	2006	Female	2022-12-23	11.3	Loumafori	[50,77]	1	no_formal_education	married	unemployed	peulh	notaccess	access	notaccess	yes	no	no	yes	(5,12]	0			-0.879082	Middle SEP	16	negative
month7	7165	2005	Male	2022-12-27	13	Loumafori	[50,77]	1	secondary	married	unemployed	soussou	access	access	access	yes	yes	no	yes	(5,12]	0			-0.429527	Middle SEP	17	negative
month7	7170	2004	Female	2022-12-21	9.9	Kimara	[35,50)	2	primary	married	unemployed	autres	notaccess	access	access	no	no	no	no	(5,12]	0			7.09522	High SEP	18	negative
month7	7178	2004	Male	2022-12-21	12.5	Layah	[50,77]	2	no_formal_education	married	unemployed	soussou	notaccess	access	access	no	no	no	no	(5,12]	0			7.09622	High SEP	18	negative
month7	7182	2003	Male	2022-12-21	11.4	Carrefour_Fodéyah	[50,77]	2	secondary	single	unemployed	peulh	access	access	access	yes	yes	no	yes	(5,12]	0			-2.78022	Low SEP	19	negative
month7	7198	2006	Female	2022-12-21	11.2	Carrefour_Fodéyah	[35,50)	1	secondary	married	unemployed	autres	access	access	access	yes	yes	no	yes	(12,35]	0			-2.39036	Low SEP	16	negative
month7	7205	2006	Male	2022-12-21	15.3	Carrefour_Fodéyah	[22,35)	2	secondary	married	unemployed	soussou	notaccess	access	access	no	no	no	yes	[3,5]	0			-2.27019	Low SEP	16	negative
month7	7220	2006	Male	2022-12-19	10.8	Tanene	[35,50)	2	no_formal_education	married	commerçant	soussou	notaccess	access	notaccess	yes	yes	no	no	(5,12]	0			0.215648	High SEP	16	negative
month7	7284	2005	Female	2022-12-20	11.7	Sarata	[35,50)	2	secondary	single	commerçant	soussou	notaccess	notaccess	notaccess	yes	yes	no	yes	(12,35]	0			-0.579554	Middle SEP	17	negative
month7	7310	2006	Male	2022-12-20	11	Sarata	[35,50)	1	secondary	married	unemployed	peulh	access	access	access	yes	yes	yes	yes	[3,5]	0			-1.11153	Middle SEP	16	negative
month7	7328	2007	Female	2022-12-19	10.3	Maire_daouda	[35,50)	1	secondary	married	fonctionnaire	soussou	access	notaccess	access	no	no	no	yes	[3,5]	0			-0.985454	Middle SEP	15	negative
month7	7337	2007	Male	2022-12-19	12.3	Maire_daouda	[22,35)	2	secondary	married	unemployed	soussou	access	access	access	yes	yes	no	yes	(5,12]	0			-2.21705	Low SEP	15	negative
month7	7340	2004	Female	2022-12-23	11.2	Hafia	[22,35)	2	primary	married	commerçant	soussou	access	access	notaccess	yes	yes	no	no	(5,12]	0			-2.44867	Low SEP	18	negative
month7	7353	2007	Female	2022-12-22	11.6	Layah	[35,50)	2	secondary	married	fonctionnaire	soussou	access	access	notaccess	no	no	no	no	(5,12]	0			7.11804	High SEP	15	negative
month7	7361	2005	Female	2022-12-23	10	Hafia	[22,35)	2	secondary	married	unemployed	soussou	notaccess	access	access	no	no	no	yes	[3,5]	0			-1.12778	Middle SEP	17	negative
month7	7368	2003	Female	2022-12-23	13.1	Hafia	[22,35)	2	secondary	married	unemployed	soussou	notaccess	access	access	no	no	no	yes	[3,5]	0			-3.18271	Low SEP	19	negative
month7	7389	2006	Female	2022-12-27	11.1	Loumafori	[50,77]	1	no_formal_education	married	unemployed	peulh	notaccess	access	notaccess	yes	yes	no	no	(12,35]	0			-3.06552	Low SEP	16	negative
month8	7007	2008	Male	2023-01-05	14.2	Foulawa	[35,50)	1	secondary	married	commerçant	peulh	access	access	notaccess	yes	yes	no	yes	(5,12]	0			-1.44789	Middle SEP	15	negative
month8	7017	2005	Female	2023-01-12	13.5	Carrefour_Fodéyah	[50,77]	1	secondary	married	fonctionnaire	peulh	access	notaccess	notaccess	yes	yes	no	yes	[3,5]	0			-3.61857	Low SEP	18	negative
month8	7019	2004	Male	2023-01-05	11.3	Foulawa	[35,50)	1	secondary	married	fonctionnaire	peulh	notaccess	access	access	yes	no	no	no	(5,12]	0			0.081847	High SEP	19	negative
month8	7021	2006	Female	2023-01-05	12.3	Carrefour_Fodéyah	[35,50)	2	secondary	married	unemployed	peulh	notaccess	access	access	no	no	no	no	(5,12]	0			7.07663	High SEP	17	negative
month8	7032	2006	Male	2023-01-05	10.8	Foulawa	[22,35)	2	secondary	married	fonctionnaire	peulh	notaccess	access	access	yes	yes	no	no	[3,5]	0			-0.377383	Middle SEP	17	negative
month8	7034	2007	Female	2023-01-05	12.1	Foulawa	[22,35)	2	secondary	married	fonctionnaire	peulh	notaccess	access	access	yes	yes	no	no	[3,5]	0			-0.377134	Middle SEP	16	negative
month8	7035	2007	Male	2023-01-05	10.3	Foulawa	[22,35)	2	secondary	married	fonctionnaire	peulh	notaccess	access	access	yes	yes	no	no	[3,5]	0			-0.377009	Middle SEP	16	negative
month8	7048	2008	Female	2023-01-11	12.1	Layah	[50,77]	2	secondary	married	agriculteur	soussou	notaccess	access	notaccess	yes	yes	yes	yes	(12,35]	0			-1.22226	Middle SEP	15	negative
month8	7060	2004	Male	2023-01-11	12.3	Carrefour_Fodéyah	[35,50)	1	primary	married	unemployed	soussou	access	access	access	no	no	no	no	(5,12]	0			7.0815	High SEP	19	negative
month8	7064	2008	Male	2023-01-09	12.1	Layah	[35,50)	2	secondary	married	unemployed	soussou	access	access	access	no	no	no	yes	[3,5]	0			-2.08031	Middle SEP	15	negative
month8	7087	2008	Female	2023-01-09	12	Loumafori	[35,50)	2	secondary	married	unemployed	autres	notaccess	access	notaccess	yes	yes	no	no	[3,5]	0			-0.130631	High SEP	15	negative
month8	7095	2005	Female	2023-01-09	13.2	Tanene	[22,35)	2	no_formal_education	married	unemployed	soussou	notaccess	notaccess	access	no	no	no	no	(5,12]	0			7.08586	High SEP	18	negative
month8	7104	2004	Female	2023-01-09	12.3	Sarata	[22,35)	2	no_formal_education	married	unemployed	soussou	notaccess	notaccess	access	no	no	no	no	(5,12]	0			7.08698	High SEP	19	negative
month8	7119	2004	Male	2023-01-10	13.2	Olympio	[35,50)	2	no_formal_education	married	commerçant	peulh	notaccess	notaccess	notaccess	yes	no	no	yes	(5,12]	0			-2.94561	Low SEP	19	negative
month8	7135	2004	Male	2023-01-19	14.1	Hafia	[22,35)	2	secondary	married	unemployed	autres	notaccess	access	access	yes	yes	no	yes	(5,12]	0			-2.60462	Low SEP	19	negative
month8	7147	2006	Female	2023-01-18	14.7	Loumafori	[50,77]	1	secondary	married	unemployed	autres	access	access	access	yes	yes	no	yes	(12,35]	0			-2.52174	Low SEP	17	negative
month8	7148	2005	Male	2023-01-11	12.7	Loumafori	[50,77]	1	secondary	married	unemployed	autres	access	access	access	yes	yes	no	yes	(12,35]	0			-2.52162	Low SEP	18	negative
month8	7151	2007	Female	2023-01-18	14.9	Loumafori	[50,77]	1	secondary	married	unemployed	autres	access	access	access	yes	yes	no	yes	(12,35]	0			-2.52125	Low SEP	16	negative
month8	7152	2005	Female	2023-01-21	12.5	Loumafori	[50,77]	1	secondary	married	unemployed	autres	access	access	access	yes	yes	no	yes	(12,35]	0			-2.52112	Low SEP	18	negative
month8	7155	2006	Male	2023-01-18	13.2	Loumafori	[50,77]	1	secondary	married	unemployed	peulh	access	access	notaccess	yes	yes	no	yes	(12,35]	0			-3.47281	Low SEP	17	negative
month8	7156	2008	Male	2023-01-18	14	Loumafori	[50,77]	1	secondary	married	unemployed	peulh	access	access	notaccess	yes	yes	no	yes	(12,35]	0			-3.47268	Low SEP	15	negative
month8	7157	2004	Male	2023-01-19	12.3	Loumafori	[50,77]	1	no_formal_education	married	unemployed	peulh	notaccess	access	notaccess	yes	no	no	yes	(5,12]	0			-0.879331	Middle SEP	19	negative
month8	7159	2006	Female	2023-01-19	11.3	Loumafori	[50,77]	1	no_formal_education	married	unemployed	peulh	notaccess	access	notaccess	yes	no	no	yes	(5,12]	0			-0.879082	Middle SEP	17	negative
month8	7165	2005	Male	2023-01-18	13.1	Loumafori	[50,77]	1	secondary	married	unemployed	soussou	access	access	access	yes	yes	no	yes	(5,12]	240	0	Pf	-0.429527	Middle SEP	18	positive
month8	7170	2004	Female	2023-01-16	11.7	Tanene	[35,50)	2	no_formal_education	married	commerçant	soussou	notaccess	notaccess	notaccess	no	no	no	no	(5,12]	0			7.09522	High SEP	19	negative
month8	7178	2004	Male	2023-01-16	10.8	Layah	[50,77]	2	no_formal_education	married	unemployed	soussou	notaccess	access	access	no	no	no	no	(5,12]	19480	0	Pf	7.09622	High SEP	19	positive
month8	7198	2006	Female	2023-01-16	12.8	Carrefour_Fodéyah	[35,50)	1	secondary	married	unemployed	autres	access	access	access	yes	yes	no	yes	(12,35]	0			-2.39036	Low SEP	17	negative
month8	7205	2006	Male	2023-01-16	17	Carrefour_Fodéyah	[22,35)	2	secondary	married	unemployed	soussou	notaccess	access	access	no	no	no	yes	[3,5]	0			-2.27019	Low SEP	17	negative
month8	7207	2008	Female	2023-01-16	12.1	Carrefour_Fodéyah	[22,35)	2	secondary	married	unemployed	soussou	notaccess	access	access	no	no	no	yes	[3,5]	0			-2.26994	Low SEP	15	negative
month8	7220	2006	Male	2023-01-12	11.4	Tanene	[35,50)	2	no_formal_education	married	commerçant	soussou	notaccess	access	notaccess	yes	yes	no	no	(5,12]	0			0.215648	High SEP	17	negative
month8	7284	2005	Female	2023-01-16	12	Sarata	[35,50)	2	secondary	single	commerçant	soussou	notaccess	notaccess	notaccess	yes	yes	no	yes	(12,35]	0			-0.579554	Middle SEP	18	negative
month8	7310	2006	Male	2023-01-16	10.5	Sarata	[35,50)	1	secondary	married	unemployed	peulh	access	access	access	yes	yes	yes	yes	[3,5]	0			-1.11153	Middle SEP	17	negative
month8	7328	2007	Female	2023-01-11	13.8	Maire_daouda	[35,50)	1	secondary	married	fonctionnaire	soussou	access	notaccess	access	no	no	no	yes	[3,5]	0			-0.985454	Middle SEP	16	negative
month8	7337	2007	Male	2023-01-24	11.8	Maire_daouda	[22,35)	2	secondary	married	unemployed	soussou	access	access	access	yes	yes	no	yes	(5,12]	0			-2.21705	Low SEP	16	negative
month8	7340	2004	Female	2023-01-19	11.8	Hafia	[22,35)	2	primary	married	commerçant	soussou	access	access	notaccess	yes	yes	no	no	(5,12]	0			-2.44867	Low SEP	19	negative
month8	7353	2007	Female	2023-01-13	7.6	Layah	[35,50)	2	secondary	married	fonctionnaire	soussou	access	access	notaccess	no	no	no	no	(5,12]	0			7.11804	High SEP	16	negative
month8	7359	2008	Male	2023-01-09	10	Layah	[22,35)	2	secondary	married	unemployed	soussou	notaccess	access	access	no	no	no	no	(5,12]	0			-3.28043	Low SEP	15	negative
month8	7361	2005	Female	2023-01-19	10.3	Hafia	[22,35)	2	secondary	married	unemployed	soussou	notaccess	access	access	no	no	no	yes	[3,5]	0			-1.12778	Middle SEP	18	negative
month8	7389	2006	Female	2023-01-18	12	Loumafori	[50,77]	1	no_formal_education	married	unemployed	peulh	notaccess	access	notaccess	yes	yes	no	no	(12,35]	200	0	Pm	-3.06552	Low SEP	17	positive
month8	7391	2008	Male	2023-01-18	12	Loumafori	[50,77]	1	no_formal_education	married	unemployed	peulh	notaccess	access	notaccess	yes	yes	no	no	(12,35]	0			-3.06527	Low SEP	15	negative
month9	7003	2006	Male	2023-02-13	12.8	Carrefour_Fodéyah	[50,77]	1	secondary	married	fonctionnaire	peulh	access	notaccess	notaccess	yes	yes	no	yes	[3,5]	0			-3.62032	Low SEP	17	negative
month9	7013	2004	Male	2023-02-13	11.1	Foulawa	[50,77]	1	no_formal_education	married	unemployed	peulh	access	access	notaccess	no	no	no	yes	(5,12]	0			-0.420177	Middle SEP	19	negative
month9	7017	2006	Female	2023-02-13	9.3	Carrefour_Fodéyah	[50,77]	1	secondary	married	fonctionnaire	peulh	access	notaccess	notaccess	yes	yes	no	yes	[3,5]	0			-3.61857	Low SEP	17	negative
month9	7048	2008	Female	2023-02-23	11	Layah	[50,77]	2	secondary	married	agriculteur	soussou	notaccess	access	notaccess	yes	yes	yes	yes	(12,35]	0			-1.22226	Middle SEP	15	negative
month9	7060	2004	Male	2023-02-23	11.7	Carrefour_Fodéyah	[35,50)	1	primary	married	unemployed	soussou	access	access	access	no	no	no	no	(5,12]	0			7.0815	High SEP	19	negative
month9	7064	2008	Male	2023-02-23	13.1	Layah	[35,50)	2	secondary	married	unemployed	soussou	access	access	access	no	no	no	yes	[3,5]	0			-2.08031	Middle SEP	15	negative
month9	7087	2008	Female	2023-02-15	10.3	Loumafori	[35,50)	2	secondary	married	unemployed	autres	notaccess	access	notaccess	yes	yes	no	no	[3,5]	0			-0.130631	High SEP	15	negative
month9	7095	2005	Female	2023-02-15	12.3	Tanene	[22,35)	2	no_formal_education	married	unemployed	soussou	notaccess	notaccess	access	no	no	no	no	(5,12]	0			7.08586	High SEP	18	negative
month9	7104	2004	Female	2023-02-15	13.1	Sarata	[22,35)	2	no_formal_education	married	unemployed	soussou	notaccess	notaccess	access	no	no	no	no	(5,12]	0			7.08698	High SEP	19	negative
month9	7119	2004	Male	2023-02-15	16.1	Olympio	[35,50)	2	no_formal_education	married	commerçant	peulh	notaccess	notaccess	notaccess	yes	no	no	yes	(5,12]	0			-2.94561	Low SEP	19	negative
month9	7135	2004	Male	2023-02-24	10.7	Hafia	[22,35)	2	secondary	married	unemployed	autres	notaccess	access	access	yes	yes	no	yes	(5,12]	0			-2.60462	Low SEP	19	negative
month9	7147	2006	Female	2023-02-22	14	Loumafori	[50,77]	1	secondary	married	unemployed	autres	access	access	access	yes	yes	no	yes	(12,35]	0			-2.52174	Low SEP	17	negative
month9	7148	2005	Male	2023-02-22	11.8	Loumafori	[50,77]	1	secondary	married	unemployed	autres	access	access	access	yes	yes	no	yes	(12,35]	0			-2.52162	Low SEP	18	negative
month9	7151	2007	Female	2023-02-22	13	Loumafori	[50,77]	1	secondary	married	unemployed	autres	access	access	access	yes	yes	no	yes	(12,35]	0			-2.52125	Low SEP	16	negative
month9	7152	2005	Female	2023-02-25	11.3	Loumafori	[50,77]	1	secondary	married	unemployed	autres	access	access	access	yes	yes	no	yes	(12,35]	0			-2.52112	Low SEP	18	negative
month9	7155	2006	Male	2023-02-22	10.6	Loumafori	[50,77]	1	secondary	married	unemployed	peulh	access	access	notaccess	yes	yes	no	yes	(12,35]	0			-3.47281	Low SEP	17	negative
month9	7156	2008	Male	2023-02-22	12.2	Loumafori	[50,77]	1	secondary	married	unemployed	peulh	access	access	notaccess	yes	yes	no	yes	(12,35]	0			-3.47268	Low SEP	15	negative
month9	7157	2004	Male	2023-02-24	12.3	Loumafori	[50,77]	1	no_formal_education	married	unemployed	peulh	notaccess	access	notaccess	yes	no	no	yes	(5,12]	0			-0.879331	Middle SEP	19	negative
month9	7159	2006	Female	2023-02-24	11.5	Loumafori	[50,77]	1	no_formal_education	married	unemployed	peulh	notaccess	access	notaccess	yes	no	no	yes	(5,12]	0			-0.879082	Middle SEP	17	negative
month9	7165	2005	Male	2023-02-22	13.5	Loumafori	[50,77]	1	secondary	married	unemployed	soussou	access	access	access	yes	yes	no	yes	(5,12]	0			-0.429527	Middle SEP	18	negative
month9	7170	2004	Female	2023-02-22	12	Layah	[35,50)	2	no_formal_education	married	unemployed	soussou	notaccess	access	access	no	no	no	no	(5,12]	0			7.09522	High SEP	19	negative
month9	7178	2004	Male	2023-02-22	13.8	Layah	[50,77]	2	no_formal_education	married	unemployed	soussou	notaccess	access	access	no	no	no	no	(5,12]	0			7.09622	High SEP	19	negative
month9	7198	2006	Female	2023-02-21	13.8	Carrefour_Fodéyah	[35,50)	1	secondary	married	unemployed	autres	access	access	access	yes	yes	no	yes	(12,35]	0			-2.39036	Low SEP	17	negative
month9	7205	2006	Male	2023-02-21	14.7	Carrefour_Fodéyah	[22,35)	2	secondary	married	unemployed	soussou	notaccess	access	access	no	no	no	yes	[3,5]	0			-2.27019	Low SEP	17	negative
month9	7207	2008	Female	2023-02-21	12.4	Carrefour_Fodéyah	[22,35)	2	secondary	married	unemployed	soussou	notaccess	access	access	no	no	no	yes	[3,5]	0			-2.26994	Low SEP	15	negative
month9	7220	2006	Male	2023-02-16	12.1	Tanene	[35,50)	2	no_formal_education	married	commerçant	soussou	notaccess	access	notaccess	yes	yes	no	no	(5,12]	20	0	Pm	0.215648	High SEP	17	positive
month9	7234	2008	Male	2023-02-22	12.3	Sarata	[22,35)	2	primary	married	unemployed	soussou	access	access	notaccess	no	no	no	no	(5,12]	0			7.1032	High SEP	15	negative
month9	7284	2005	Female	2023-02-20	11.2	Sarata	[35,50)	2	secondary	single	commerçant	soussou	notaccess	notaccess	notaccess	yes	yes	no	yes	(12,35]	0			-0.579554	Middle SEP	18	negative
month9	7310	2006	Male	2023-02-20	12.7	Sarata	[35,50)	1	secondary	married	unemployed	peulh	access	access	access	yes	yes	yes	yes	[3,5]	0			-1.11153	Middle SEP	17	negative
month9	7328	2007	Female	2023-02-15	12.1	Maire_daouda	[35,50)	1	secondary	married	fonctionnaire	soussou	access	notaccess	access	no	no	no	yes	[3,5]	0			-0.985454	Middle SEP	16	negative
month9	7340	2004	Female	2023-02-24	10.9	Hafia	[22,35)	2	primary	married	commerçant	soussou	access	access	notaccess	yes	yes	no	no	(5,12]	0			-2.44867	Low SEP	19	negative
month9	7353	2007	Female	2023-02-23	11.2	Layah	[35,50)	2	secondary	married	fonctionnaire	soussou	access	access	notaccess	no	no	no	no	(5,12]	0			7.11804	High SEP	16	negative
month9	7359	2008	Male	2023-02-27	10	Layah	[22,35)	2	secondary	married	unemployed	soussou	notaccess	access	access	no	no	no	no	(5,12]	0			-3.28043	Low SEP	15	negative
month9	7361	2005	Female	2023-02-24	12.3	Hafia	[22,35)	2	secondary	married	unemployed	soussou	notaccess	access	access	no	no	no	yes	[3,5]	0			-1.12778	Middle SEP	18	negative
month9	7389	2006	Female	2023-02-22	12.8	Loumafori	[50,77]	1	no_formal_education	married	unemployed	peulh	notaccess	access	notaccess	yes	yes	no	no	(12,35]	400	8	Pf +Pm + Gf	-3.06552	Low SEP	17	positive
month9	7391	2008	Male	2023-02-22	13	Loumafori	[50,77]	1	no_formal_education	married	unemployed	peulh	notaccess	access	notaccess	yes	yes	no	no	(12,35]	0			-3.06527	Low SEP	15	negative

## Sheet: Dictionnary
Inequity in the use of Insecticide-Treated Nets among Children and Adolescents in Rural Guinea: A cohort study in rural Guinea. Almamy Amara TOURE1,2,4, Sidikiba SIDIBE2, Aboubacar Sidiki MAGASSOUBA2, Abdoul Habib BEAVOGUI3, Abdoulaye Fodé TOURE1, Amadou Wann1, Mohamed Prince KABA1, Alexandre DELAMOU2,5, Seni KOUANDA1,7. 1.Institut Africain de Santé Publique (IASP/USTA) of the University Saint Th…
Visit_Number	round number
Birth_Year	Birth year of participant
Visit_Date	Date of visit
Gender	participant gender
hemoglobin	hemoglobin
residence	Place of living
Head_age	Head of household age
Head_gender	Head of household gender	1=Man; 2=Woman
Head_education	Head of household education
Head_marital_status	Head of household marital status
Head_occupation	Head of household occupation
Head_ethnic	Head of household ethnic
Head_radio	Head of household access to radio
Head_tv	Head of household access to tv
Head_internet	Head of household access to internet
access_itn	Household access to ITN
use_itn	Household use of ITN
travel_child	Has the child travelled from the study site?
mosquito_repellent_use	Use of mosquito repellent
hh_num	Household size (numberof people in the household)
PARASITEMIE	Parasitemia (density)
Gametocytemie	Gametocytemia
Especes	species
index_wealth_quint	socieeconomic index (quintiles)
wealth_quintile	wealth quintile (socioeconomic position
age_part	participant age
parasitemia_rec	asymptomatic malaria status
