# Supplementary material for: Inequity in the use of Insecticide-Treated Nets among Children and Adolescents in Rural Guinea: A cohort study in rural Guinea
Source: Research Square preprint supplement (doi:10.21203/rs.3.rs-7447768/v1), 2025-10-10
Supplement: Supplementary file 2 [file b2ae77b0a158d84539981fff.docx]

**Inequity in the use of Insecticide-Treated Nets among Children and Adolescents in Rural Guinea: A cohort study in rural Guinea.**

Almamy Amara TOURE1,2,4, Sidikiba SIDIBE2, Aboubacar Sidiki MAGASSOUBA2, Abdoul Habib BEAVOGUI3, Abdoulaye Fodé TOURE1, Amadou Wann1, Mohamed Prince KABA1, Alexandre DELAMOU2,5, Seni KOUANDA1,7.

1.Institut Africain de Santé Publique (IASP/USTA) of the University Saint Thomas D’Aquin, Ouagadougou, Burkina Faso. 2. Department of Public Health, Faculty of Health Sciences and Techniques, Gamal Abdel Nasser University, Conakry, Guinea. 3. Centre National de Formation et de Recherche en Santé Rurale de Mafèrinyah, Forécariah, Guinea. 4. National Institute of Public Health, Coyah, Guinea. 5. Centre d´Excellence Africain pour la Prévention et le Contrôle des Maladies Transmissibles (CEA-PCMT), Gamal Abdel Nasser University, Conakry, Guinea. 6. Institut Africain de Santé publique, Ouagadougou, Burkina Faso.

**Authors' email address**

**Almamy Amara TOURE (corresponding author):** [**almamy@maferinyah.org**](mailto:almamy@maferinyah.org)

**Sidikiba SIDIBE : [layesidikiba@gmail.com](mailto:layesidikiba@gmail.com)**

**Aboubacar Sidiki MAGASSOUBA : [magasbakary01@yahoo.fr](mailto:magasbakary01@yahoo.fr)**

**Abdoul Habib BEAVOGUI: [bea@maferinyah.org](mailto:bea@maferinyah.org)**

**Abdoulaye Fode TOURE : [abdoulayefodetoure@gmail.com](mailto:abdoulayefodetoure@gmail.com)**

**Amadou Wann :** [**amadouwann38@gmail.com**](mailto:amadouwann38@gmail.com)

**Mohamed Prince KABA: [mohamedpreux@gmail.com](mailto:mohamedpreux@gmail.com)**

**Alexandre DELAMOU : [adelamou@cea-pcmt.org](mailto:adelamou@cea-pcmt.org)**

**Seni KOUANDA: [senikouanda@gmail.com](mailto:senikouanda@gmail.com)**

**Supplementary materials**

Table 1: sociodemographic characteristics by ITN use among children. Cohort study, Maferinyah 2021-2022.

|  | **No** | **Yes** | **p-value** |
| --- | --- | --- | --- |
|  | ***N=574*** | ***N=858*** |  |
| Gender |  |  | 0.007 |
| Female | 225 (39.2%) | 399 (46.5%) |  |
| Male | 349 (60.8%) | 459 (53.5%) |  |
| Head of household age |  |  | <0.001 |
| [22,33] | 199 (34.7%) | 202 (23.5%) |  |
| (33,58] | 271 (47.2%) | 450 (52.4%) |  |
| (58,76] | 104 (18.1%) | 206 (24.0%) |  |
| Head of household gender |  |  | 0.078 |
| Female | 235 (40.9%) | 393 (45.8%) |  |
| Male | 339 (59.1%) | 465 (54.2%) |  |
| Head of household education |  |  | <0.001 |
| No formal education | 212 (36.9%) | 248 (28.9%) |  |
| Primary | 114 (19.9%) | 69 (8.04%) |  |
| Secondary | 248 (43.2%) | 541 (61.2%) |  |
| Head of household marital status |  |  | 0.630 |
| Married | 523 (91.1%) | 774 (90.2%) |  |
| Single | 51 (8.89%) | 84 (9.79%) |  |
| Head of household occupation |  |  | <0.001 |
| Farmer | 57 (9.93%) | 160 (18.6%) |  |
| Merchant | 69 (12.0%) | 141 (16.4%) |  |
| Civil servant | 93 (16.2%) | 25 (2.91%) |  |
| Unemployed | 60 (10.5%) | 54 (6.29%) |  |
| Farmer | 295 (51.4%) | 478 (55.7%) |  |
| Head of household ethnic |  |  | <0.001 |
| Soussou | 320 (55.7%) | 495 (57.7%) |  |
| Peulh | 227 (39.5%) | 227 (26.5%) |  |
| Malinké | 26 (4.53%) | 32 (3.73%) |  |
| Autres | 1 (0.17%) | 104 (12.1%) |  |
| Head of household access to radio |  |  | 0.001 |
| No access | 283 (49.3%) | 346 (40.3%) |  |
| Access | 291 (50.7%) | 512 (59.7%) |  |
| Head of household access to tv |  |  | <0.001 |
| No access | 199 (34.7%) | 172 (20.0%) |  |
| Access | 375 (65.3%) | 686 (80.0%) |  |
| Head of household access to internet |  |  | <0.001 |
| No access | 228 (39.7%) | 466 (54.3%) |  |
| Access | 346 (60.3%) | 392 (45.7%) |  |
| Has child travelled far from study setting? |  |  | 0.227 |
| No | 539 (93.9%) | 790 (92.1%) |  |
| Yes | 35 (6.10%) | 68 (7.93%) |  |
| Use of mosquito repellent (coil) as preventive measures |  |  | <0.001 |
| No | 341 (59.4%) | 282 (32.9%) |  |
| Yes | 233 (40.6%) | 576 (67.1%) |  |
| Number of household members |  |  | 0.014 |
| [3,5] | 170 (29.6%) | 229 (26.7%) |  |
| (5,12] | 312 (54.4%) | 438 (51.0%) |  |
| (12,35] | 92 (16.0%) | 191 (22.3%) |  |
| Wealth quintile |  |  | <0.001 |
| Low socioeconomic position (SEP) | 130 (22.6%) | 283 (33.0%) |  |
| Middle_SEP | 125 (21.8%) | 418 (48.7%) |  |
| High SEP | 319 (55.6%) | 157 (18.3%) |  |

*Note: Table 1 reflects aggregated data across repeated monthly visits (N = 1,424). Some individuals contribute multiple observations.*

Table 1: sociodemographic characteristics by ITN use among children. Cohort study, Maferinyah 2022

|  | **No** | **Yes** | **p.overall** |
| --- | --- | --- | --- |
|  | ***N=480*** | ***N=502*** |  |
| Gender |  |  | 0.003 |
| Female | 260 (54.2%) | 224 (44.6%) |  |
| Male | 220 (45.8%) | 278 (55.4%) |  |
| Head of household age |  |  | <0.001 |
| [22,33] | 123 (25.6%) | 127 (25.3%) |  |
| (33,58] | 304 (63.3%) | 248 (49.4%) |  |
| (58,76] | 53 (11.0%) | 127 (25.3%) |  |
| Head of household gender |  |  | <0.001 |
| Female | 163 (34.0%) | 244 (48.6%) |  |
| Male | 317 (66.0%) | 258 (51.4%) |  |
| Head of household education |  |  | <0.001 |
| No formal education | 211 (44.0%) | 100 (19.9%) |  |
| Primary | 91 (19.0%) | 65 (12.9%) |  |
| Secondary | 178 (32.7%) | 337 (65.7%) |  |
| Head of household marital status |  |  | 1.000 |
| Married | 434 (90.4%) | 453 (90.2%) |  |
| Single | 46 (9.58%) | 49 (9.76%) |  |
| Head of household occupation |  |  | <0.001 |
| Farmer | 35 (7.29%) | 65 (12.9%) |  |
| Merchant | 115 (24.0%) | 108 (21.5%) |  |
| Civil servant | 35 (7.29%) | 0 (0.00%) |  |
| Unemployed | 21 (4.38%) | 53 (10.6%) |  |
| Farmer | 274 (57.1%) | 276 (55.0%) |  |
| Head of household ethnic |  |  | <0.001 |
| Soussou | 327 (68.1%) | 179 (35.7%) |  |
| Peulh | 151 (31.5%) | 172 (34.3%) |  |
| Malinké | 0 (0.00%) | 28 (5.58%) |  |
| Autres | 2 (0.42%) | 123 (24.5%) |  |
| Head of household access to radio |  |  | <0.001 |
| No access | 312 (65.0%) | 224 (44.6%) |  |
| Access | 168 (35.0%) | 278 (55.4%) |  |
| Head of household access to tv |  |  | <0.001 |
| No access | 164 (34.2%) | 89 (17.7%) |  |
| Access | 316 (65.8%) | 413 (82.3%) |  |
| Head of household access to internet |  |  | 0.016 |
| No access | 223 (46.5%) | 273 (54.4%) |  |
| Access | 257 (53.5%) | 229 (45.6%) |  |
| Has child travelled far from study setting? |  |  | <0.001 |
| No | 480 (100%) | 473 (94.2%) |  |
| Yes | 0 (0.00%) | 29 (5.78%) |  |
| Use of mosquito repellent (coil) as preventive measures |  |  | <0.001 |
| No | 271 (56.5%) | 136 (27.1%) |  |
| Yes | 209 (43.5%) | 366 (72.9%) |  |
| Number of household members |  |  | <0.001 |
| [3,5] | 126 (26.2%) | 157 (31.3%) |  |
| (5,12] | 264 (55.0%) | 175 (34.9%) |  |
| (12,35] | 90 (18.8%) | 170 (33.9%) |  |
| Wealth quintile |  |  | <0.001 |
| Low socioeconomic position (SEP) | 110 (22.9%) | 271 (54.0%) |  |
| Middle SEP | 108 (22.5%) | 173 (34.5%) |  |
| High SEP | 262 (54.6%) | 58 (11.6%) |  |

*Note: Table 2 reflects aggregated data across repeated monthly visits (N = 982). Some individuals contribute multiple observations.*
