# Supplementary material for: Inequity in the use of Insecticide-Treated Nets among Children and Adolescents in Rural Guinea: A cohort study in rural Guinea
Source: Research Square preprint supplement (doi:10.21203/rs.3.rs-7447768/v1), 2025-10-10
Supplement: Supplementary file 3 [file cbb97756958a250b7014c9b2.xlsx]

## Sheet: children_data
			Inequity in the use of Insecticide-Treated Nets among Children and Adolescents in Rural Guinea: A cohort study in rural Guinea. Almamy Amara TOURE1,2,4, Sidikiba SIDIBE2, Aboubacar Sidiki MAGASSOUBA2, Abdoul Habib BEAVOGUI3, Abdoulaye Fodé TOURE1, Amadou Wann1, Mohamed Prince KABA1, Alexandre DELAMOU2,5, Seni KOUANDA1,7. 1.Institut Africain de Santé Publique (IASP/USTA) of the University Saint Th…
Visit_Number	Subject_ID	Birth_Year	Gender	Visit_Date	Hemoglogin_level	residence	Head_age	Head_gender	Head_education	Head_marital_status	Head_occupation	Head_ethnic	Head_radio	Head_tv	Head_internet	access_itn	use_itn	travel_child	mosquito_repellent_use	hh_num	PARASITEMIE	Gametocytemie	Especes	index_wealth_quint	wealth_quintile	age_part	parasitemia_rec
month1	7008	2018	Male	2022-03-07	12.6	Foulawa	[50,77]	1	secondary	married	unemployed	peulh	notaccess	access	access	yes	yes	no	yes	(5,12]	0			-3.45246	Low SEP	4	negative
month1	7009	2019	Female	2022-03-07	15.3	Foulawa	[50,77]	1	secondary	married	unemployed	peulh	notaccess	access	access	yes	yes	no	yes	(5,12]	0			-3.45234	Low SEP	3	negative
month1	7025	2020	Male	2022-03-07	11.7	Foulawa	[50,77]	1	no_formal_education	married	agriculteur	peulh	notaccess	notaccess	notaccess	no	no	no	no	(5,12]	0			7.07713	High SEP	2	negative
month1	7027	2018	Male	2022-03-07	13.9	Foulawa	[50,77]	1	no_formal_education	married	agriculteur	peulh	notaccess	notaccess	notaccess	no	no	no	no	(5,12]	0			7.07738	High SEP	4	negative
month1	7028	2018	Male	2022-03-08	12.4	Foulawa	[50,77]	1	secondary	married	fonctionnaire	peulh	access	access	access	no	no	no	no	(5,12]	0			-4.27079	Low SEP	4	negative
month1	7030	2018	Female	2022-03-08	16.7	Foulawa	[50,77]	1	secondary	married	fonctionnaire	peulh	access	access	access	no	no	no	no	(5,12]	0			-4.27054	Low SEP	4	negative
month1	7034	2019	Female	2022-03-08	12.7	Foulawa	[22,35)	2	secondary	married	fonctionnaire	peulh	notaccess	access	access	yes	yes	no	no	[3,5]	0			-0.377134	Middle SEP	3	negative
month1	7039	2019	Male	2022-03-08	11.7	Hafia	[22,35)	2	secondary	married	commerçant	peulh	notaccess	notaccess	access	yes	yes	no	yes	[3,5]	0			-2.24533	Low SEP	3	negative
month1	7044	2020	Female	2022-03-09	8.4	Layah	[22,35)	2	secondary	single	unemployed	soussou	access	access	access	yes	yes	no	yes	(5,12]	0			0.873086	High SEP	2	negative
month1	7053	2018	Male	2022-03-09	13.6	Layah	[50,77]	2	no_formal_education	married	unemployed	soussou	notaccess	access	access	no	no	no	yes	(5,12]	0			-2.88488	Low SEP	4	negative
month1	7058	2019	Male	2022-03-09	8.4	Carrefour_Fodéyah	[35,50)	1	primary	married	unemployed	soussou	access	access	access	no	no	no	no	(5,12]	0			7.08125	High SEP	3	negative
month1	7067	2018	Female	2022-03-09	13.4	Layah	[35,50)	2	secondary	married	unemployed	soussou	access	access	access	no	no	no	yes	[3,5]	0			-2.07994	Middle SEP	4	negative
month1	7075	2019	Female	2022-03-09	11.5	Layah	[35,50)	2	secondary	married	fonctionnaire	soussou	access	access	notaccess	yes	yes	no	no	(5,12]	0			-1.49014	Middle SEP	3	negative
month1	7079	2021	Female	2022-03-09	11.1	Sarata	[50,77]	2	no_formal_education	married	agriculteur	autres	access	access	access	yes	yes	no	yes	(12,35]	0			-0.376221	Middle SEP	1	negative
month1	7082	2019	Male	2022-03-09	13.4	Layah	[35,50)	2	no_formal_education	married	unemployed	soussou	access	access	notaccess	yes	yes	no	no	(5,12]	0			0.643152	High SEP	3	negative
month1	7083	2019	Male	2022-03-09	11.9	Layah	[35,50)	2	no_formal_education	married	unemployed	soussou	access	access	notaccess	yes	yes	no	no	(5,12]	0			0.643277	High SEP	3	negative
month1	7085	2018	Male	2022-03-09	11.5	Layah	[35,50)	2	no_formal_education	married	unemployed	soussou	access	access	notaccess	yes	yes	no	no	(5,12]	0			0.643526	High SEP	4	negative
month1	7086	2020	Female	2022-03-09	11.17	Layah	[35,50)	2	no_formal_education	married	unemployed	soussou	access	access	notaccess	yes	yes	no	no	(5,12]	0			0.643651	High SEP	2	negative
month1	7090	2020	Female	2022-03-10	11.3	Olympio	[22,35)	2	secondary	single	unemployed	autres	notaccess	access	access	yes	yes	no	yes	(5,12]	0			-3.96978	Low SEP	2	negative
month1	7106	2020	Male	2022-03-10	12.6	Sarata	[22,35)	2	no_formal_education	married	unemployed	soussou	notaccess	notaccess	access	no	no	no	no	(5,12]	0			7.08723	High SEP	2	negative
month1	7120	2018	Female	2022-03-11	11.9	Tanene	[22,35)	2	no_formal_education	married	unemployed	soussou	notaccess	notaccess	access	yes	yes	no	no	[3,5]	0			-0.993959	Middle SEP	4	negative
month1	7123	2020	Female	2022-03-11	9.8	Tanene	[22,35)	2	no_formal_education	married	unemployed	soussou	notaccess	notaccess	access	yes	yes	no	no	[3,5]	0			-0.993585	Middle SEP	2	negative
month1	7128	2018	Male	2022-03-14	11.5	Olympio	[50,77]	1	secondary	married	agriculteur	soussou	access	access	notaccess	yes	yes	no	no	(12,35]	0			-0.927872	Middle SEP	4	negative
month1	7150	2020	Male	2022-03-14	11.4	Loumafori	[50,77]	1	secondary	married	unemployed	autres	access	access	access	yes	yes	no	yes	(12,35]	0			-2.52137	Low SEP	2	negative
month1	7164	2020	Male	2022-03-15	8.7	Loumafori	[50,77]	1	secondary	married	unemployed	soussou	access	access	access	yes	yes	no	yes	(5,12]	0			-0.429652	Middle SEP	2	negative
month1	7167	2018	Male	2022-03-15	7.6	Loumafori	[50,77]	1	secondary	married	unemployed	soussou	access	access	access	yes	yes	no	yes	(5,12]	0			-0.429278	Middle SEP	4	negative
month1	7175	2018	Female	2022-03-16	11.8	Carrefour_Fodéyah	[50,77]	1	secondary	married	fonctionnaire	peulh	access	notaccess	notaccess	yes	no	no	yes	(12,35]	0			-3.08041	Low SEP	4	negative
month1	7176	2019	Female	2022-03-16	10.6	Carrefour_Fodéyah	[50,77]	1	secondary	married	fonctionnaire	peulh	access	notaccess	notaccess	yes	no	no	yes	(12,35]	0			-3.08029	Low SEP	3	negative
month1	7185	2018	Male	2022-03-16	13	Carrefour_Fodéyah	[22,35)	1	secondary	married	unemployed	soussou	notaccess	access	access	no	no	no	no	(5,12]	0			7.09709	High SEP	4	negative
month1	7192	2020	Male	2022-03-16	12.3	Carrefour_Fodéyah	[35,50)	1	primary	married	unemployed	soussou	access	access	access	no	no	no	yes	(12,35]	0			-0.226339	Middle SEP	2	negative
month1	7209	2021	Male	2022-03-17	13.3	Tanene	[22,35)	2	primary	married	unemployed	soussou	access	access	notaccess	no	no	no	yes	[3,5]	0			-3.82775	Low SEP	1	negative
month1	7222	2018	Female	2022-03-17	12.1	Olympio	[50,77]	1	secondary	married	agriculteur	soussou	access	access	notaccess	yes	yes	no	yes	(5,12]	0			-2.90403	Low SEP	4	negative
month1	7226	2021	Female	2022-03-17	13.3	Olympio	[50,77]	1	secondary	married	agriculteur	soussou	access	access	notaccess	yes	yes	no	yes	(5,12]	0			-2.90353	Low SEP	1	negative
month1	7231	2020	Male	2022-03-18	11.2	Olympio	[50,77]	1	secondary	married	agriculteur	soussou	access	access	notaccess	yes	yes	no	yes	(5,12]	0			-2.9029	Low SEP	2	negative
month1	7238	2020	Male	2022-03-18	13.3	Tanene	[22,35)	2	no_formal_education	married	commerçant	soussou	notaccess	access	notaccess	yes	yes	no	no	(12,35]	0			-2.11018	Middle SEP	2	negative
month1	7239	2020	Male	2022-03-18	14.1	Layah	[35,50)	2	no_formal_education	single	commerçant	soussou	notaccess	notaccess	notaccess	no	no	no	no	(5,12]	0			7.10382	High SEP	2	negative
month1	7243	2018	Male	2022-03-18	16.3	Tanene	[22,35)	2	no_formal_education	married	unemployed	soussou	notaccess	notaccess	access	yes	yes	yes	yes	[3,5]	0			-1.55379	Middle SEP	4	negative
month1	7245	2018	Female	2022-03-18	11.2	Tanene	[22,35)	2	no_formal_education	married	unemployed	soussou	notaccess	notaccess	access	yes	yes	yes	yes	[3,5]	2444	0	Pf	-1.55354	Middle SEP	4	positive
month1	7246	2020	Female	2022-03-18	16.2	Tanene	[22,35)	2	no_formal_education	married	unemployed	soussou	access	access	access	yes	yes	no	yes	(5,12]	0			0.0412568	High SEP	2	negative
month1	7250	2018	Male	2022-03-18	12.6	Tanene	[22,35)	2	primary	married	unemployed	soussou	access	access	notaccess	no	no	no	yes	[3,5]	0			-1.81799	Middle SEP	4	negative
month1	7253	2020	Female	2022-03-21	10.3	Olympio	[50,77]	1	secondary	married	agriculteur	soussou	access	access	notaccess	yes	yes	no	no	(12,35]	0			-0.912279	Middle SEP	2	negative
month1	7255	2019	Male	2022-03-21	8.5	Kimara	[50,77]	2	secondary	married	unemployed	soussou	access	access	access	yes	yes	no	yes	(5,12]	0			-3.66317	Low SEP	3	negative
month1	7256	2020	Female	2022-03-21	11.3	Kimara	[50,77]	2	secondary	married	unemployed	soussou	access	access	access	yes	yes	no	yes	(5,12]	0			-3.66304	Low SEP	2	negative
month1	7257	2021	Female	2022-03-21	12	Layah	[35,50)	2	no_formal_education	married	unemployed	soussou	notaccess	notaccess	notaccess	no	no	no	no	(5,12]	0			7.10607	High SEP	1	negative
month1	7261	2018	Male	2022-03-21	9.4	Layah	[22,35)	2	no_formal_education	married	unemployed	peulh	notaccess	notaccess	access	no	no	no	yes	[3,5]	0			0.516335	High SEP	4	negative
month1	7262	2020	Male	2022-03-21	12.6	Layah	[22,35)	2	no_formal_education	married	unemployed	peulh	notaccess	notaccess	access	no	no	no	yes	[3,5]	0			0.516459	High SEP	2	negative
month1	7263	2019	Male	2022-03-21	12.4	Kimara	[35,50)	2	primary	married	unemployed	autres	access	access	access	yes	yes	no	yes	[3,5]	0			-3.13507	Low SEP	3	negative
month1	7264	2021	Male	2022-03-21	13.3	Kimara	[35,50)	2	primary	married	unemployed	autres	access	access	access	yes	yes	no	yes	[3,5]	0			-3.13495	Low SEP	1	negative
month1	7279	2018	Female	2022-03-22	12	Sarata	[50,77]	1	no_formal_education	married	agriculteur	soussou	notaccess	notaccess	notaccess	yes	yes	no	yes	[3,5]	0			-1.57318	Middle SEP	4	negative
month1	7281	2018	Female	2022-03-22	12.4	Sarata	[35,50)	2	secondary	single	commerçant	soussou	notaccess	notaccess	notaccess	yes	yes	no	yes	(12,35]	0			-0.579929	Middle SEP	4	negative
month1	7282	2021	Female	2022-03-22	12.5	Sarata	[35,50)	2	secondary	single	commerçant	soussou	notaccess	notaccess	notaccess	yes	yes	no	yes	(12,35]	0			-0.579804	Middle SEP	1	negative
month1	7290	2021	Male	2022-03-22	10.8	Kimara	[50,77]	1	primary	married	agriculteur	soussou	access	access	access	yes	yes	no	no	(5,12]	928	0	Pf	-2.39649	Low SEP	1	positive
month1	7294	2018	Female	2022-03-22	12.2	Layah	[35,50)	2	no_formal_education	single	commerçant	soussou	notaccess	notaccess	notaccess	no	no	no	no	(5,12]	0			7.11069	High SEP	4	negative
month1	7300	2018	Male	2022-03-22	14.8	Sarata	[50,77]	1	secondary	married	unemployed	soussou	access	access	access	yes	yes	no	no	(12,35]	0			-0.937562	Middle SEP	4	negative
month1	7306	2018	Female	2022-03-22	11.5	Foulawa	[35,50)	1	secondary	married	fonctionnaire	peulh	notaccess	access	access	no	no	no	no	(5,12]	0			7.11218	High SEP	4	negative
month1	7307	2021	Female	2022-03-22	16.3	Sarata	[35,50)	1	secondary	married	unemployed	peulh	access	access	access	yes	yes	yes	yes	[3,5]	0			-1.1119	Middle SEP	1	negative
month1	7308	2021	Male	2022-03-22	11.3	Sarata	[35,50)	1	secondary	married	unemployed	peulh	access	access	access	yes	yes	yes	yes	[3,5]	0			-1.11178	Middle SEP	1	negative
month1	7321	2019	Female	2022-03-23	11.9	Sarata	[35,50)	1	secondary	married	unemployed	peulh	access	access	access	yes	yes	yes	yes	[3,5]	0			-1.11016	Middle SEP	3	negative
month1	7325	2019	Male	2022-03-23	12	Layah	[35,50)	2	no_formal_education	married	commerçant	soussou	notaccess	notaccess	notaccess	no	no	no	no	(5,12]	0			7.11455	High SEP	3	negative
month1	7333	2019	Male	2022-03-23	10.7	Kimara	[50,77]	1	secondary	married	unemployed	soussou	access	access	notaccess	yes	yes	no	yes	(12,35]	0			-2.47526	Low SEP	3	negative
month1	7342	2018	Male	2022-03-24	12.1	Hafia	[22,35)	2	primary	married	commerçant	soussou	access	access	notaccess	yes	yes	no	no	(5,12]	0			-2.44842	Low SEP	4	negative
month1	7346	2020	Male	2022-03-24	13.7	Layah	[35,50)	2	no_formal_education	married	commerçant	soussou	notaccess	notaccess	notaccess	yes	yes	no	yes	[3,5]	0			-0.666261	Middle SEP	2	negative
month1	7356	2021	Female	2022-03-24	6.4	Layah	[50,77]	2	secondary	married	unemployed	soussou	access	access	notaccess	yes	yes	no	no	(5,12]	1213	0	Pf	-1.94947	Middle SEP	1	positive
month1	7360	2018	Male	2022-03-24	8.9	Layah	[22,35)	2	secondary	married	unemployed	soussou	notaccess	access	access	no	no	no	no	(5,12]	0			-3.2803	Low SEP	4	negative
month1	7362	2020	Female	2022-03-24	10.8	Hafia	[22,35)	2	secondary	married	unemployed	autres	notaccess	access	notaccess	no	no	no	no	[3,5]	0			-2.14861	Low SEP	2	negative
month1	7363	2021	Female	2022-03-24	11	Hafia	[22,35)	2	secondary	married	unemployed	autres	notaccess	access	notaccess	no	no	no	no	[3,5]	0			-2.14849	Low SEP	1	negative
month1	7364	2021	Male	2022-03-24	15.1	Maire_daouda	[22,35)	2	secondary	married	fonctionnaire	peulh	access	access	access	yes	no	yes	yes	(5,12]	0			-1.17798	Middle SEP	1	negative
month1	7365	2019	Female	2022-03-24	12.9	Maire_daouda	[22,35)	2	secondary	married	fonctionnaire	peulh	access	access	access	yes	no	yes	yes	(5,12]	0			-1.17785	Middle SEP	3	negative
month1	7366	2019	Male	2022-03-24	15.4	Maire_daouda	[22,35)	2	secondary	married	fonctionnaire	peulh	access	access	access	yes	no	yes	yes	(5,12]	0			-1.17773	Middle SEP	3	negative
month1	7367	2020	Male	2022-03-24	13.6	Maire_daouda	[22,35)	2	secondary	married	fonctionnaire	peulh	access	access	access	yes	no	yes	yes	(5,12]	0			-1.1776	Middle SEP	2	negative
month1	7369	2019	Female	2022-03-24	11.7	Hafia	[22,35)	2	secondary	married	unemployed	soussou	notaccess	access	access	no	no	no	yes	[3,5]	0			-3.18259	Low SEP	3	negative
month1	7370	2020	Female	2022-03-24	11.5	Hafia	[22,35)	2	secondary	married	unemployed	soussou	notaccess	access	access	no	no	no	yes	[3,5]	0			-3.18246	Low SEP	2	negative
month1	7377	2018	Male	2022-03-24	14.1	Layah	[22,35)	2	primary	single	unemployed	soussou	access	access	access	no	no	no	yes	[3,5]	0			0.349824	High SEP	4	negative
month1	7378	2019	Female	2022-03-24	11.6	Layah	[22,35)	2	primary	single	unemployed	soussou	access	access	access	no	no	no	yes	[3,5]	0			0.349948	High SEP	3	negative
month1	7381	2019	Male	2022-03-25	15.4	Layah	[35,50)	2	no_formal_education	married	unemployed	soussou	access	notaccess	notaccess	no	no	no	no	(5,12]	1024	0	Pf	7.12154	High SEP	3	positive
month1	7384	2021	Female	2022-03-25	9.5	Hafia	[50,77]	2	no_formal_education	single	commerçant	autres	notaccess	notaccess	notaccess	yes	yes	no	no	(5,12]	0			-0.716017	Middle SEP	1	negative
month1	7385	2019	Male	2022-03-25	13.3	Hafia	[50,77]	2	no_formal_education	single	commerçant	autres	notaccess	notaccess	notaccess	yes	yes	no	no	(5,12]	0			-0.715892	Middle SEP	3	negative
month1	7386	2020	Male	2022-03-25	12.2	Loumafori	[50,77]	1	no_formal_education	married	unemployed	peulh	notaccess	access	notaccess	yes	yes	no	no	(12,35]	0			-3.06589	Low SEP	2	negative
month1	7393	2018	Female	2022-03-25	11.9	Loumafori	[50,77]	1	no_formal_education	married	unemployed	peulh	notaccess	access	notaccess	yes	yes	no	no	(12,35]	977	0	Pf	-3.06502	Low SEP	4	positive
month2	7003	2021	Female	2022-04-25	13.5	Carrefour_Fodéyah	[50,77]	1	secondary	married	fonctionnaire	peulh	access	notaccess	notaccess	yes	yes	no	yes	[3,5]	189	0	Pf	-3.62032	Low SEP	1	positive
month2	7007	2019	Male	2022-04-25	12.9	Foulawa	[35,50)	1	secondary	married	commerçant	peulh	access	access	notaccess	yes	yes	no	yes	(5,12]	0			-1.44789	Middle SEP	3	negative
month2	7010	2018	Male	2022-04-25	12.4	Foulawa	[50,77]	1	secondary	married	unemployed	peulh	notaccess	access	access	yes	yes	no	yes	(5,12]	0			-3.45221	Low SEP	4	negative
month2	7021	2020	Male	2022-04-26	12.7	Carrefour_Fodéyah	[35,50)	2	secondary	married	unemployed	peulh	notaccess	access	access	no	no	no	no	(5,12]	0			7.07663	High SEP	2	negative
month2	7024	2018	Female	2022-04-26	11.3	Foulawa	[50,77]	1	no_formal_education	married	agriculteur	peulh	notaccess	notaccess	notaccess	no	no	no	no	(5,12]	0			7.07701	High SEP	4	negative
month2	7028	2020	Male	2022-04-27	11.7	Foulawa	[50,77]	1	secondary	married	fonctionnaire	peulh	access	access	access	no	no	no	no	(5,12]	0			-4.27079	Low SEP	2	negative
month2	7031	2021	Male	2022-04-27	11.6	Carrefour_Fodéyah	[35,50)	2	secondary	married	unemployed	peulh	notaccess	access	access	no	no	no	yes	[3,5]	0			-4.49309	Low SEP	1	negative
month2	7039	2020	Male	2022-04-25	12	Hafia	[22,35)	2	secondary	married	commerçant	peulh	notaccess	notaccess	access	yes	yes	no	yes	[3,5]	0			-2.24533	Low SEP	2	negative
month2	7044	2020	Female	2022-04-27	9.7	Layah	[22,35)	2	secondary	single	unemployed	soussou	access	access	access	yes	yes	no	yes	(5,12]	0			0.873086	High SEP	2	negative
month2	7053	2018	Male	2022-04-27	10.6	Layah	[50,77]	2	no_formal_education	married	unemployed	soussou	notaccess	access	access	no	no	no	yes	(5,12]	0			-2.88488	Low SEP	4	negative
month2	7058	2019	Male	2022-04-29	9.8	Carrefour_Fodéyah	[35,50)	1	primary	married	unemployed	soussou	access	access	access	no	no	no	no	(5,12]	413	0	Pf	7.08125	High SEP	3	positive
month2	7067	2018	Female	2022-04-29	11.8	Layah	[35,50)	2	secondary	married	unemployed	soussou	access	access	access	no	no	no	yes	[3,5]	0			-2.07994	Middle SEP	4	negative
month2	7075	2019	Female	2022-04-27	9	Layah	[35,50)	2	secondary	married	fonctionnaire	soussou	access	access	notaccess	yes	yes	no	no	(5,12]	0			-1.49014	Middle SEP	3	negative
month2	7079	2021	Female	2022-04-27	12.6	Sarata	[50,77]	2	no_formal_education	married	agriculteur	autres	access	access	access	yes	yes	no	yes	(12,35]	0			-0.376221	Middle SEP	1	negative
month2	7082	2019	Male	2022-04-27	11.6	Layah	[35,50)	2	no_formal_education	married	unemployed	soussou	access	access	notaccess	yes	yes	no	no	(5,12]	0			0.643152	High SEP	3	negative
month2	7083	2019	Male	2022-04-27	9.39	Layah	[35,50)	2	no_formal_education	married	unemployed	soussou	access	access	notaccess	yes	yes	no	no	(5,12]	0			0.643277	High SEP	3	negative
month2	7085	2018	Male	2022-04-27	9.49	Layah	[35,50)	2	no_formal_education	married	unemployed	soussou	access	access	notaccess	yes	yes	no	no	(5,12]	0			0.643526	High SEP	4	negative
month2	7086	2020	Female	2022-04-27	8.7	Layah	[35,50)	2	no_formal_education	married	unemployed	soussou	access	access	notaccess	yes	yes	no	no	(5,12]	0			0.643651	High SEP	2	negative
month2	7090	2020	Female	2022-05-04	9.7	Olympio	[22,35)	2	secondary	single	unemployed	autres	notaccess	access	access	yes	yes	no	yes	(5,12]	0			-3.96978	Low SEP	2	negative
month2	7106	2020	Male	2022-05-04	11	Sarata	[22,35)	2	no_formal_education	married	unemployed	soussou	notaccess	notaccess	access	no	no	no	no	(5,12]	0			7.08723	High SEP	2	negative
month2	7120	2018	Female	2022-05-04	11.4	Tanene	[22,35)	2	no_formal_education	married	unemployed	soussou	notaccess	notaccess	access	yes	yes	no	no	[3,5]	0			-0.993959	Middle SEP	4	negative
month2	7123	2020	Female	2022-05-04	10.6	Tanene	[22,35)	2	no_formal_education	married	unemployed	soussou	notaccess	notaccess	access	yes	yes	no	no	[3,5]	0			-0.993585	Middle SEP	2	negative
month2	7150	2020	Male	2022-05-06	11.2	Loumafori	[50,77]	1	secondary	married	unemployed	autres	access	access	access	yes	yes	no	yes	(12,35]	0			-2.52137	Low SEP	2	negative
month2	7164	2020	Male	2022-05-06	9.4	Loumafori	[50,77]	1	secondary	married	unemployed	soussou	access	access	access	yes	yes	no	yes	(5,12]	0			-0.429652	Middle SEP	2	negative
month2	7167	2018	Male	2022-05-06	8.6	Loumafori	[50,77]	1	secondary	married	unemployed	soussou	access	access	access	yes	yes	no	yes	(5,12]	0			-0.429278	Middle SEP	4	negative
month2	7175	2018	Female	2022-05-11	12.4	Carrefour_Fodéyah	[50,77]	1	secondary	married	fonctionnaire	peulh	access	notaccess	notaccess	yes	no	no	yes	(12,35]	0			-3.08041	Low SEP	4	negative
month2	7176	2019	Female	2022-05-11	12.6	Carrefour_Fodéyah	[50,77]	1	secondary	married	fonctionnaire	peulh	access	notaccess	notaccess	yes	no	no	yes	(12,35]	0			-3.08029	Low SEP	3	negative
month2	7185	2018	Male	2022-05-12	11.8	Carrefour_Fodéyah	[22,35)	1	secondary	married	unemployed	soussou	notaccess	access	access	no	no	no	no	(5,12]	0			7.09709	High SEP	4	negative
month2	7192	2020	Male	2022-05-12	12.3	Carrefour_Fodéyah	[35,50)	1	primary	married	unemployed	soussou	access	access	access	no	no	no	yes	(12,35]	0			-0.226339	Middle SEP	2	negative
month2	7209	2021	Male	2022-05-18	12.1	Tanene	[22,35)	2	primary	married	unemployed	soussou	access	access	notaccess	no	no	no	yes	[3,5]	0			-3.82775	Low SEP	1	negative
month2	7222	2018	Female	2022-05-18	11.2	Olympio	[50,77]	1	secondary	married	agriculteur	soussou	access	access	notaccess	yes	yes	no	yes	(5,12]	0			-2.90403	Low SEP	4	negative
month2	7239	2020	Male	2022-05-23	13.2	Foulawa	[35,50)	1	no_formal_education	married	commerçant	peulh	notaccess	access	notaccess	no	no	no	no	(5,12]	0			7.10382	High SEP	2	negative
month2	7243	2018	Male	2022-05-18	14.6	Tanene	[22,35)	2	no_formal_education	married	unemployed	soussou	notaccess	notaccess	access	yes	yes	yes	yes	[3,5]	0			-1.55379	Middle SEP	4	negative
month2	7245	2018	Female	2022-05-18	11.4	Tanene	[22,35)	2	no_formal_education	married	unemployed	soussou	notaccess	notaccess	access	yes	yes	yes	yes	[3,5]	0			-1.55354	Middle SEP	4	negative
month2	7246	2020	Female	2022-05-18	14.5	Tanene	[22,35)	2	no_formal_education	married	unemployed	soussou	access	access	access	yes	yes	no	yes	(5,12]	0			0.0412568	High SEP	2	negative
month2	7250	2018	Male	2022-05-18	12.2	Tanene	[22,35)	2	primary	married	unemployed	soussou	access	access	notaccess	no	no	no	yes	[3,5]	0			-1.81799	Middle SEP	4	negative
month2	7253	2020	Female	2022-05-09	9.5	Olympio	[50,77]	1	secondary	married	agriculteur	soussou	access	access	notaccess	yes	yes	no	no	(12,35]	0			-0.912279	Middle SEP	2	negative
month2	7255	2019	Male	2022-05-09	8	Kimara	[50,77]	2	secondary	married	unemployed	soussou	access	access	access	yes	yes	no	yes	(5,12]	0			-3.66317	Low SEP	3	negative
month2	7256	2020	Female	2022-05-09	11.5	Kimara	[50,77]	2	secondary	married	unemployed	soussou	access	access	access	yes	yes	no	yes	(5,12]	0			-3.66304	Low SEP	2	negative
month2	7257	2021	Female	2022-05-09	11.6	Olympio	[35,50)	1	primary	married	agriculteur	soussou	access	access	notaccess	no	no	no	no	(5,12]	0			7.10607	High SEP	1	negative
month2	7261	2018	Male	2022-05-09	12.5	Layah	[22,35)	2	no_formal_education	married	unemployed	peulh	notaccess	notaccess	access	no	no	no	yes	[3,5]	0			0.516335	High SEP	4	negative
month2	7262	2020	Male	2022-05-09	8.7	Layah	[22,35)	2	no_formal_education	married	unemployed	peulh	notaccess	notaccess	access	no	no	no	yes	[3,5]	0			0.516459	High SEP	2	negative
month2	7263	2019	Male	2022-05-09	11	Kimara	[35,50)	2	primary	married	unemployed	autres	access	access	access	yes	yes	no	yes	[3,5]	0			-3.13507	Low SEP	3	negative
month2	7264	2021	Male	2022-05-09	12.9	Kimara	[35,50)	2	primary	married	unemployed	autres	access	access	access	yes	yes	no	yes	[3,5]	0			-3.13495	Low SEP	1	negative
month2	7279	2018	Female	2022-05-13	12.1	Sarata	[50,77]	1	no_formal_education	married	agriculteur	soussou	notaccess	notaccess	notaccess	yes	yes	no	yes	[3,5]	0			-1.57318	Middle SEP	4	negative
month2	7281	2018	Female	2022-05-17	12	Sarata	[35,50)	2	secondary	single	commerçant	soussou	notaccess	notaccess	notaccess	yes	yes	no	yes	(12,35]	0			-0.579929	Middle SEP	4	negative
month2	7282	2021	Female	2022-05-17	12.6	Sarata	[35,50)	2	secondary	single	commerçant	soussou	notaccess	notaccess	notaccess	yes	yes	no	yes	(12,35]	0			-0.579804	Middle SEP	1	negative
month2	7294	2018	Female	2022-05-13	11	Sarata	[35,50)	1	no_formal_education	married	commerçant	soussou	notaccess	notaccess	access	no	no	no	no	(5,12]	0			7.11069	High SEP	4	negative
month2	7300	2018	Male	2022-05-13	11.5	Sarata	[50,77]	1	secondary	married	unemployed	soussou	access	access	access	yes	yes	no	no	(12,35]	0			-0.937562	Middle SEP	4	negative
month2	7306	2018	Female	2022-05-17	11.6	Foulawa	[35,50)	1	secondary	married	fonctionnaire	peulh	notaccess	access	access	no	no	no	no	(5,12]	0			7.11218	High SEP	4	negative
month2	7307	2021	Female	2022-05-13	12.9	Sarata	[35,50)	1	secondary	married	unemployed	peulh	access	access	access	yes	yes	yes	yes	[3,5]	0			-1.1119	Middle SEP	1	negative
month2	7308	2021	Male	2022-05-13	12	Sarata	[35,50)	1	secondary	married	unemployed	peulh	access	access	access	yes	yes	yes	yes	[3,5]	0			-1.11178	Middle SEP	1	negative
month2	7321	2019	Female	2022-05-13	13	Sarata	[35,50)	1	secondary	married	unemployed	peulh	access	access	access	yes	yes	yes	yes	[3,5]	0			-1.11016	Middle SEP	3	negative
month2	7333	2019	Male	2022-05-10	10.8	Kimara	[50,77]	1	secondary	married	unemployed	soussou	access	access	notaccess	yes	yes	no	yes	(12,35]	888	0	Pf	-2.47526	Low SEP	3	positive
month2	7342	2018	Male	2022-05-16	12.5	Hafia	[22,35)	2	primary	married	commerçant	soussou	access	access	notaccess	yes	yes	no	no	(5,12]	0			-2.44842	Low SEP	4	negative
month2	7346	2020	Male	2022-04-27	12	Layah	[35,50)	2	no_formal_education	married	commerçant	soussou	notaccess	notaccess	notaccess	yes	yes	no	yes	[3,5]	0			-0.666261	Middle SEP	2	negative
month2	7356	2021	Female	2022-04-27	6.5	Layah	[50,77]	2	secondary	married	unemployed	soussou	access	access	notaccess	yes	yes	no	no	(5,12]	838	0	Pf	-1.94947	Middle SEP	1	positive
month2	7360	2018	Male	2022-04-29	8.4	Layah	[22,35)	2	secondary	married	unemployed	soussou	notaccess	access	access	no	no	no	no	(5,12]	0			-3.2803	Low SEP	4	negative
month2	7362	2020	Female	2022-05-16	11.2	Hafia	[22,35)	2	secondary	married	unemployed	autres	notaccess	access	notaccess	no	no	no	no	[3,5]	0			-2.14861	Low SEP	2	negative
month2	7363	2021	Female	2022-05-16	11.2	Hafia	[22,35)	2	secondary	married	unemployed	autres	notaccess	access	notaccess	no	no	no	no	[3,5]	0			-2.14849	Low SEP	1	negative
month2	7364	2021	Male	2022-05-18	12.7	Maire_daouda	[22,35)	2	secondary	married	fonctionnaire	peulh	access	access	access	yes	no	yes	yes	(5,12]	0			-1.17798	Middle SEP	1	negative
month2	7365	2019	Female	2022-05-18	12.7	Maire_daouda	[22,35)	2	secondary	married	fonctionnaire	peulh	access	access	access	yes	no	yes	yes	(5,12]	0			-1.17785	Middle SEP	3	negative
month2	7366	2019	Male	2022-05-18	12.5	Maire_daouda	[22,35)	2	secondary	married	fonctionnaire	peulh	access	access	access	yes	no	yes	yes	(5,12]	0			-1.17773	Middle SEP	3	negative
month2	7367	2020	Male	2022-05-18	11.6	Maire_daouda	[22,35)	2	secondary	married	fonctionnaire	peulh	access	access	access	yes	no	yes	yes	(5,12]	0			-1.1776	Middle SEP	2	negative
month2	7369	2019	Female	2022-05-17	12.4	Hafia	[22,35)	2	secondary	married	unemployed	soussou	notaccess	access	access	no	no	no	yes	[3,5]	0			-3.18259	Low SEP	3	negative
month2	7370	2020	Female	2022-05-17	11.5	Hafia	[22,35)	2	secondary	married	unemployed	soussou	notaccess	access	access	no	no	no	yes	[3,5]	0			-3.18246	Low SEP	2	negative
month2	7377	2018	Male	2022-04-27	13.9	Layah	[22,35)	2	primary	single	unemployed	soussou	access	access	access	no	no	no	yes	[3,5]	0			0.349824	High SEP	4	negative
month2	7381	2019	Male	2022-05-06	12.7	Olympio	[35,50)	1	primary	married	agriculteur	soussou	access	access	notaccess	no	no	no	no	(5,12]	0			7.12154	High SEP	3	negative
month2	7384	2021	Female	2022-05-17	12.2	Hafia	[50,77]	2	no_formal_education	single	commerçant	autres	notaccess	notaccess	notaccess	yes	yes	no	no	(5,12]	1259	0	Pf	-0.716017	Middle SEP	1	positive
month2	7385	2019	Male	2022-05-17	12.6	Hafia	[50,77]	2	no_formal_education	single	commerçant	autres	notaccess	notaccess	notaccess	yes	yes	no	no	(5,12]	0			-0.715892	Middle SEP	3	negative
month2	7386	2020	Male	2022-05-17	11.8	Loumafori	[50,77]	1	no_formal_education	married	unemployed	peulh	notaccess	access	notaccess	yes	yes	no	no	(12,35]	0			-3.06589	Low SEP	2	negative
month3	7010	2020	Female	2022-06-15	13.3	Foulawa	[50,77]	1	secondary	married	unemployed	peulh	notaccess	access	access	yes	yes	no	yes	(5,12]	0			-3.45221	Low SEP	2	negative
month3	7014	2020	Female	2022-06-15	11.9	Foulawa	[50,77]	1	no_formal_education	married	unemployed	peulh	access	access	notaccess	no	no	no	yes	(5,12]	0			-0.420052	Middle SEP	2	negative
month3	7028	2019	Male	2022-06-15	11.7	Foulawa	[50,77]	1	secondary	married	fonctionnaire	peulh	access	access	access	no	no	no	no	(5,12]	0			-4.27079	Low SEP	3	negative
month3	7030	2018	Female	2022-06-15	14.9	Foulawa	[50,77]	1	secondary	married	fonctionnaire	peulh	access	access	access	no	no	no	no	(5,12]	0			-4.27054	Low SEP	4	negative
month3	7036	2018	Male	2022-06-16	10.9	Hafia	[22,35)	2	secondary	married	commerçant	peulh	notaccess	notaccess	access	yes	yes	no	yes	[3,5]	0			-2.2457	Low SEP	4	negative
month3	7038	2018	Male	2022-06-17	12	Hafia	[22,35)	2	secondary	married	commerçant	peulh	notaccess	notaccess	access	yes	yes	no	yes	[3,5]	0			-2.24545	Low SEP	4	negative
month3	7041	2019	Male	2022-06-15	12.4	Foulawa	[50,77]	1	secondary	married	fonctionnaire	peulh	access	access	access	no	no	no	no	(5,12]	0			-4.26917	Low SEP	3	negative
month3	7044	2020	Female	2022-06-17	10.4	Layah	[22,35)	2	secondary	single	unemployed	soussou	access	access	access	yes	yes	no	yes	(5,12]	12160	0	Pf	0.873086	High SEP	2	positive
month3	7053	2018	Male	2022-06-17	12.7	Layah	[50,77]	2	no_formal_education	married	unemployed	soussou	notaccess	access	access	no	no	no	yes	(5,12]	0			-2.88488	Low SEP	4	negative
month3	7058	2019	Male	2022-06-20	10.8	Carrefour_Fodéyah	[35,50)	1	primary	married	unemployed	soussou	access	access	access	no	no	no	no	(5,12]	0			7.08125	High SEP	3	negative
month3	7067	2018	Female	2022-06-17	10.1	Layah	[35,50)	2	secondary	married	unemployed	soussou	access	access	access	no	no	no	yes	[3,5]	0			-2.07994	Middle SEP	4	negative
month3	7075	2019	Female	2022-06-20	10.6	Layah	[35,50)	2	secondary	married	fonctionnaire	soussou	access	access	notaccess	yes	yes	no	no	(5,12]	0			-1.49014	Middle SEP	3	negative
month3	7079	2021	Female	2022-06-17	12.5	Sarata	[50,77]	2	no_formal_education	married	agriculteur	autres	access	access	access	yes	yes	no	yes	(12,35]	0			-0.376221	Middle SEP	1	negative
month3	7082	2019	Male	2022-06-17	12	Layah	[35,50)	2	no_formal_education	married	unemployed	soussou	access	access	notaccess	yes	yes	no	no	(5,12]	0			0.643152	High SEP	3	negative
month3	7083	2019	Male	2022-06-17	10.8	Layah	[35,50)	2	no_formal_education	married	unemployed	soussou	access	access	notaccess	yes	yes	no	no	(5,12]	0			0.643277	High SEP	3	negative
month3	7085	2018	Male	2022-06-17	10.3	Layah	[35,50)	2	no_formal_education	married	unemployed	soussou	access	access	notaccess	yes	yes	no	no	(5,12]	96000	0	Pf	0.643526	High SEP	4	positive
month3	7086	2020	Female	2022-06-17	10.5	Layah	[35,50)	2	no_formal_education	married	unemployed	soussou	access	access	notaccess	yes	yes	no	no	(5,12]	280000	24	Pf +Gf	0.643651	High SEP	2	positive
month3	7090	2020	Female	2022-06-30	11.2	Olympio	[22,35)	2	secondary	single	unemployed	autres	notaccess	access	access	yes	yes	no	yes	(5,12]	0			-3.96978	Low SEP	2	negative
month3	7106	2020	Male	2022-06-29	11.4	Sarata	[22,35)	2	no_formal_education	married	unemployed	soussou	notaccess	notaccess	access	no	no	no	no	(5,12]	0			7.08723	High SEP	2	negative
month3	7120	2018	Female	2022-06-30	11.1	Tanene	[22,35)	2	no_formal_education	married	unemployed	soussou	notaccess	notaccess	access	yes	yes	no	no	[3,5]	0			-0.993959	Middle SEP	4	negative
month3	7123	2020	Female	2022-06-29	10.7	Tanene	[22,35)	2	no_formal_education	married	unemployed	soussou	notaccess	notaccess	access	yes	yes	no	no	[3,5]	0			-0.993585	Middle SEP	2	negative
month3	7128	2018	Male	2022-07-04	10.5	Olympio	[50,77]	1	secondary	married	agriculteur	soussou	access	access	notaccess	yes	yes	no	no	(12,35]	10163	60	Pf + Gf	-0.927872	Middle SEP	4	positive
month3	7164	2020	Male	2022-06-23	9.4	Loumafori	[50,77]	1	secondary	married	unemployed	soussou	access	access	access	yes	yes	no	yes	(5,12]	0			-0.429652	Middle SEP	2	negative
month3	7167	2018	Male	2022-06-23	8.2	Loumafori	[50,77]	1	secondary	married	unemployed	soussou	access	access	access	yes	yes	no	yes	(5,12]	0			-0.429278	Middle SEP	4	negative
month3	7175	2018	Female	2022-06-23	12.4	Carrefour_Fodéyah	[50,77]	1	secondary	married	fonctionnaire	peulh	access	notaccess	notaccess	yes	no	no	yes	(12,35]	0			-3.08041	Low SEP	4	negative
month3	7176	2019	Female	2022-06-23	10.1	Carrefour_Fodéyah	[50,77]	1	secondary	married	fonctionnaire	peulh	access	notaccess	notaccess	yes	no	no	yes	(12,35]	0			-3.08029	Low SEP	3	negative
month3	7185	2018	Male	2022-06-23	13.6	Carrefour_Fodéyah	[22,35)	1	secondary	married	unemployed	soussou	notaccess	access	access	no	no	no	no	(5,12]	0			7.09709	High SEP	4	negative
month3	7192	2020	Male	2022-06-24	11.3	Carrefour_Fodéyah	[35,50)	1	primary	married	unemployed	soussou	access	access	access	no	no	no	yes	(12,35]	0			-0.226339	Middle SEP	2	negative
month3	7209	2021	Male	2022-07-04	12.7	Tanene	[22,35)	2	primary	married	unemployed	soussou	access	access	notaccess	no	no	no	yes	[3,5]	0			-3.82775	Low SEP	1	negative
month3	7222	2018	Female	2022-07-05	10.8	Olympio	[50,77]	1	secondary	married	agriculteur	soussou	access	access	notaccess	yes	yes	no	yes	(5,12]	0			-2.90403	Low SEP	4	negative
month3	7226	2021	Female	2022-07-04	11.7	Olympio	[50,77]	1	secondary	married	agriculteur	soussou	access	access	notaccess	yes	yes	no	yes	(5,12]	0			-2.90353	Low SEP	1	negative
month3	7238	2020	Male	2022-07-01	11.1	Tanene	[22,35)	2	no_formal_education	married	commerçant	soussou	notaccess	access	notaccess	yes	yes	no	no	(12,35]	0			-2.11018	Middle SEP	2	negative
month3	7239	2020	Male	2022-07-05	13.3	Olympio	[35,50)	1	primary	married	agriculteur	soussou	access	access	notaccess	no	no	no	no	(5,12]	0			7.10382	High SEP	2	negative
month3	7243	2018	Male	2022-07-05	14.2	Tanene	[22,35)	2	no_formal_education	married	unemployed	soussou	notaccess	notaccess	access	yes	yes	yes	yes	[3,5]	0			-1.55379	Middle SEP	4	negative
month3	7245	2018	Female	2022-07-05	11.6	Tanene	[22,35)	2	no_formal_education	married	unemployed	soussou	notaccess	notaccess	access	yes	yes	yes	yes	[3,5]	0			-1.55354	Middle SEP	4	negative
month3	7246	2020	Female	2022-07-04	16	Tanene	[22,35)	2	no_formal_education	married	unemployed	soussou	access	access	access	yes	yes	no	yes	(5,12]	0			0.0412568	High SEP	2	negative
month3	7250	2018	Male	2022-07-04	12.3	Tanene	[22,35)	2	primary	married	unemployed	soussou	access	access	notaccess	no	no	no	yes	[3,5]	0			-1.81799	Middle SEP	4	negative
month3	7253	2020	Female	2022-06-29	8.1	Olympio	[50,77]	1	secondary	married	agriculteur	soussou	access	access	notaccess	yes	yes	no	no	(12,35]	0			-0.912279	Middle SEP	2	negative
month3	7255	2019	Male	2022-06-29	8	Kimara	[50,77]	2	secondary	married	unemployed	soussou	access	access	access	yes	yes	no	yes	(5,12]	0			-3.66317	Low SEP	3	negative
month3	7256	2020	Female	2022-07-07	12.7	Kimara	[50,77]	2	secondary	married	unemployed	soussou	access	access	access	yes	yes	no	yes	(5,12]	0			-3.66304	Low SEP	2	negative
month3	7257	2021	Female	2022-06-30	12.3	Foulawa	[35,50)	1	no_formal_education	married	commerçant	peulh	notaccess	access	notaccess	no	no	no	no	(5,12]	0			7.10607	High SEP	1	negative
month3	7261	2018	Male	2022-06-30	9.5	Layah	[22,35)	2	no_formal_education	married	unemployed	peulh	notaccess	notaccess	access	no	no	no	yes	[3,5]	0			0.516335	High SEP	4	negative
month3	7262	2020	Male	2022-06-30	11.1	Layah	[22,35)	2	no_formal_education	married	unemployed	peulh	notaccess	notaccess	access	no	no	no	yes	[3,5]	0			0.516459	High SEP	2	negative
month3	7263	2019	Male	2022-06-30	13.6	Kimara	[35,50)	2	primary	married	unemployed	autres	access	access	access	yes	yes	no	yes	[3,5]	0			-3.13507	Low SEP	3	negative
month3	7264	2021	Male	2022-06-30	10.6	Kimara	[35,50)	2	primary	married	unemployed	autres	access	access	access	yes	yes	no	yes	[3,5]	0			-3.13495	Low SEP	1	negative
month3	7279	2018	Female	2022-06-27	11.5	Sarata	[50,77]	1	no_formal_education	married	agriculteur	soussou	notaccess	notaccess	notaccess	yes	yes	no	yes	[3,5]	0			-1.57318	Middle SEP	4	negative
month3	7281	2018	Female	2022-06-24	12.4	Sarata	[35,50)	2	secondary	single	commerçant	soussou	notaccess	notaccess	notaccess	yes	yes	no	yes	(12,35]	0			-0.579929	Middle SEP	4	negative
month3	7282	2021	Female	2022-06-24	12.3	Sarata	[35,50)	2	secondary	single	commerçant	soussou	notaccess	notaccess	notaccess	yes	yes	no	yes	(12,35]	0			-0.579804	Middle SEP	1	negative
month3	7294	2018	Female	2022-06-27	10.9	Layah	[35,50)	2	no_formal_education	married	unemployed	soussou	access	access	notaccess	no	no	no	no	(5,12]	0			7.11069	High SEP	4	negative
month3	7300	2018	Male	2022-07-05	11.2	Sarata	[50,77]	1	secondary	married	unemployed	soussou	access	access	access	yes	yes	no	no	(12,35]	0			-0.937562	Middle SEP	4	negative
month3	7307	2021	Female	2022-06-27	14.4	Sarata	[35,50)	1	secondary	married	unemployed	peulh	access	access	access	yes	yes	yes	yes	[3,5]	0			-1.1119	Middle SEP	1	negative
month3	7308	2021	Male	2022-06-27	11.3	Sarata	[35,50)	1	secondary	married	unemployed	peulh	access	access	access	yes	yes	yes	yes	[3,5]	0			-1.11178	Middle SEP	1	negative
month3	7321	2019	Female	2022-06-27	12.7	Sarata	[35,50)	1	secondary	married	unemployed	peulh	access	access	access	yes	yes	yes	yes	[3,5]	0			-1.11016	Middle SEP	3	negative
month3	7333	2019	Male	2022-06-30	12.9	Kimara	[50,77]	1	secondary	married	unemployed	soussou	access	access	notaccess	yes	yes	no	yes	(12,35]	0			-2.47526	Low SEP	3	negative
month3	7342	2018	Male	2022-06-27	13.1	Hafia	[22,35)	2	primary	married	commerçant	soussou	access	access	notaccess	yes	yes	no	no	(5,12]	0			-2.44842	Low SEP	4	negative
month3	7346	2020	Male	2022-06-20	13.3	Layah	[35,50)	2	no_formal_education	married	commerçant	soussou	notaccess	notaccess	notaccess	yes	yes	no	yes	[3,5]	0			-0.666261	Middle SEP	2	negative
month3	7356	2021	Female	2022-06-20	6.7	Layah	[50,77]	2	secondary	married	unemployed	soussou	access	access	notaccess	yes	yes	no	no	(5,12]	0			-1.94947	Middle SEP	1	negative
month3	7360	2018	Male	2022-06-21	7.4	Layah	[22,35)	2	secondary	married	unemployed	soussou	notaccess	access	access	no	no	no	no	(5,12]	1896	0	Pf	-3.2803	Low SEP	4	positive
month3	7362	2020	Female	2022-06-30	11	Hafia	[22,35)	2	secondary	married	unemployed	autres	notaccess	access	notaccess	no	no	no	no	[3,5]	0			-2.14861	Low SEP	2	negative
month3	7363	2021	Female	2022-06-30	10.7	Hafia	[22,35)	2	secondary	married	unemployed	autres	notaccess	access	notaccess	no	no	no	no	[3,5]	0			-2.14849	Low SEP	1	negative
month3	7364	2021	Male	2022-07-01	12.4	Maire_daouda	[22,35)	2	secondary	married	fonctionnaire	peulh	access	access	access	yes	no	yes	yes	(5,12]	0			-1.17798	Middle SEP	1	negative
month3	7365	2019	Female	2022-07-01	12.8	Maire_daouda	[22,35)	2	secondary	married	fonctionnaire	peulh	access	access	access	yes	no	yes	yes	(5,12]	0			-1.17785	Middle SEP	3	negative
month3	7366	2019	Male	2022-07-01	13.6	Maire_daouda	[22,35)	2	secondary	married	fonctionnaire	peulh	access	access	access	yes	no	yes	yes	(5,12]	0			-1.17773	Middle SEP	3	negative
month3	7367	2020	Male	2022-07-01	11.6	Maire_daouda	[22,35)	2	secondary	married	fonctionnaire	peulh	access	access	access	yes	no	yes	yes	(5,12]	0			-1.1776	Middle SEP	2	negative
month3	7369	2019	Female	2022-06-27	12.15	Hafia	[22,35)	2	secondary	married	unemployed	soussou	notaccess	access	access	no	no	no	yes	[3,5]	0			-3.18259	Low SEP	3	negative
month3	7370	2020	Female	2022-06-27	11.2	Hafia	[22,35)	2	secondary	married	unemployed	soussou	notaccess	access	access	no	no	no	yes	[3,5]	0			-3.18246	Low SEP	2	negative
month3	7377	2018	Male	2022-06-20	12.5	Layah	[22,35)	2	primary	single	unemployed	soussou	access	access	access	no	no	no	yes	[3,5]	0			0.349824	High SEP	4	negative
month3	7381	2019	Male	2022-06-21	13.2	Foulawa	[35,50)	1	no_formal_education	married	commerçant	peulh	notaccess	access	notaccess	no	no	no	no	(5,12]	256	0	Pf	7.12154	High SEP	3	positive
month3	7384	2021	Female	2022-06-28	11.5	Hafia	[50,77]	2	no_formal_education	single	commerçant	autres	notaccess	notaccess	notaccess	yes	yes	no	no	(5,12]	0			-0.716017	Middle SEP	1	negative
month3	7385	2019	Male	2022-06-28	13.8	Hafia	[50,77]	2	no_formal_education	single	commerçant	autres	notaccess	notaccess	notaccess	yes	yes	no	no	(5,12]	0			-0.715892	Middle SEP	3	negative
month3	7386	2020	Male	2022-06-28	10.8	Loumafori	[50,77]	1	no_formal_education	married	unemployed	peulh	notaccess	access	notaccess	yes	yes	no	no	(12,35]	0			-3.06589	Low SEP	2	negative
month4	7018	2020	Male	2022-08-01	15	Carrefour_Fodéyah	[50,77]	1	secondary	married	fonctionnaire	peulh	access	notaccess	notaccess	yes	yes	no	yes	[3,5]	0			-3.61844	Low SEP	2	negative
month4	7026	2018	Male	2022-08-18	14.2	Foulawa	[50,77]	1	no_formal_education	married	agriculteur	peulh	notaccess	notaccess	notaccess	no	no	no	no	(5,12]	0			7.07725	High SEP	4	negative
month4	7027	2020	Female	2022-08-18	14.8	Foulawa	[50,77]	1	no_formal_education	married	agriculteur	peulh	notaccess	notaccess	notaccess	no	no	no	no	(5,12]	0			7.07738	High SEP	2	negative
month4	7028	2021	Male	2022-08-02	13.2	Foulawa	[50,77]	1	secondary	married	fonctionnaire	peulh	access	access	access	no	no	no	no	(5,12]	0			-4.27079	Low SEP	1	negative
month4	7030	2021	Female	2022-08-01	16.9	Foulawa	[50,77]	1	secondary	married	fonctionnaire	peulh	access	access	access	no	no	no	no	(5,12]	0			-4.27054	Low SEP	1	negative
month4	7032	2018	Female	2022-08-02	14.3	Foulawa	[22,35)	2	secondary	married	fonctionnaire	peulh	notaccess	access	access	yes	yes	no	no	[3,5]	0			-0.377383	Middle SEP	4	negative
month4	7035	2019	Male	2022-08-01	11.4	Foulawa	[22,35)	2	secondary	married	fonctionnaire	peulh	notaccess	access	access	yes	yes	no	no	[3,5]	0			-0.377009	Middle SEP	3	negative
month4	7039	2019	Female	2022-08-01	12.8	Hafia	[22,35)	2	secondary	married	commerçant	peulh	notaccess	notaccess	access	yes	yes	no	yes	[3,5]	0			-2.24533	Low SEP	3	negative
month4	7044	2020	Female	2022-08-12	6.7	Layah	[22,35)	2	secondary	single	unemployed	soussou	access	access	access	yes	yes	no	yes	(5,12]	0			0.873086	High SEP	2	negative
month4	7058	2019	Male	2022-08-12	8.7	Carrefour_Fodéyah	[35,50)	1	primary	married	unemployed	soussou	access	access	access	no	no	no	no	(5,12]	0			7.08125	High SEP	3	negative
month4	7067	2018	Female	2022-08-11	13.5	Layah	[35,50)	2	secondary	married	unemployed	soussou	access	access	access	no	no	no	yes	[3,5]	0			-2.07994	Middle SEP	4	negative
month4	7075	2019	Female	2022-08-12	12.3	Layah	[35,50)	2	secondary	married	fonctionnaire	soussou	access	access	notaccess	yes	yes	no	no	(5,12]	0			-1.49014	Middle SEP	3	negative
month4	7079	2021	Female	2022-08-11	13.3	Sarata	[50,77]	2	no_formal_education	married	agriculteur	autres	access	access	access	yes	yes	no	yes	(12,35]	0			-0.376221	Middle SEP	1	negative
month4	7082	2019	Male	2022-08-11	12.3	Layah	[35,50)	2	no_formal_education	married	unemployed	soussou	access	access	notaccess	yes	yes	no	no	(5,12]	1024	0	Pf	0.643152	High SEP	3	positive
month4	7083	2019	Male	2022-08-11	10.7	Layah	[35,50)	2	no_formal_education	married	unemployed	soussou	access	access	notaccess	yes	yes	no	no	(5,12]	0			0.643277	High SEP	3	negative
month4	7085	2018	Male	2022-08-12	11.1	Layah	[35,50)	2	no_formal_education	married	unemployed	soussou	access	access	notaccess	yes	yes	no	no	(5,12]	0			0.643526	High SEP	4	negative
month4	7086	2020	Female	2022-08-12	10.7	Layah	[35,50)	2	no_formal_education	married	unemployed	soussou	access	access	notaccess	yes	yes	no	no	(5,12]	0			0.643651	High SEP	2	negative
month4	7090	2020	Female	2022-08-03	11.5	Olympio	[22,35)	2	secondary	single	unemployed	autres	notaccess	access	access	yes	yes	no	yes	(5,12]	0			-3.96978	Low SEP	2	negative
month4	7106	2020	Male	2022-08-03	11.3	Sarata	[22,35)	2	no_formal_education	married	unemployed	soussou	notaccess	notaccess	access	no	no	no	no	(5,12]	0			7.08723	High SEP	2	negative
month4	7120	2018	Female	2022-08-03	11.3	Tanene	[22,35)	2	no_formal_education	married	unemployed	soussou	notaccess	notaccess	access	yes	yes	no	no	[3,5]	0			-0.993959	Middle SEP	4	negative
month4	7123	2020	Female	2022-08-03	11.6	Tanene	[22,35)	2	no_formal_education	married	unemployed	soussou	notaccess	notaccess	access	yes	yes	no	no	[3,5]	0			-0.993585	Middle SEP	2	negative
month4	7128	2018	Male	2022-08-03	9.7	Olympio	[50,77]	1	secondary	married	agriculteur	soussou	access	access	notaccess	yes	yes	no	no	(12,35]	0			-0.927872	Middle SEP	4	negative
month4	7164	2020	Male	2022-08-16	11.6	Loumafori	[50,77]	1	secondary	married	unemployed	soussou	access	access	access	yes	yes	no	yes	(5,12]	0			-0.429652	Middle SEP	2	negative
month4	7167	2018	Male	2022-08-16	8.2	Loumafori	[50,77]	1	secondary	married	unemployed	soussou	access	access	access	yes	yes	no	yes	(5,12]	0			-0.429278	Middle SEP	4	negative
month4	7175	2018	Female	2022-08-10	11.5	Carrefour_Fodéyah	[50,77]	1	secondary	married	fonctionnaire	peulh	access	notaccess	notaccess	yes	no	no	yes	(12,35]	0			-3.08041	Low SEP	4	negative
month4	7176	2019	Female	2022-08-10	11.2	Carrefour_Fodéyah	[50,77]	1	secondary	married	fonctionnaire	peulh	access	notaccess	notaccess	yes	no	no	yes	(12,35]	0			-3.08029	Low SEP	3	negative
month4	7185	2018	Male	2022-08-10	13.2	Carrefour_Fodéyah	[22,35)	1	secondary	married	unemployed	soussou	notaccess	access	access	no	no	no	no	(5,12]	0			7.09709	High SEP	4	negative
month4	7192	2020	Male	2022-08-10	11.7	Carrefour_Fodéyah	[35,50)	1	primary	married	unemployed	soussou	access	access	access	no	no	no	yes	(12,35]	0			-0.226339	Middle SEP	2	negative
month4	7209	2021	Male	2022-08-04	14.1	Tanene	[22,35)	2	primary	married	unemployed	soussou	access	access	notaccess	no	no	no	yes	[3,5]	0			-3.82775	Low SEP	1	negative
month4	7222	2018	Female	2022-08-06	11	Olympio	[50,77]	1	secondary	married	agriculteur	soussou	access	access	notaccess	yes	yes	no	yes	(5,12]	0			-2.90403	Low SEP	4	negative
month4	7226	2021	Female	2022-08-04	11	Olympio	[50,77]	1	secondary	married	agriculteur	soussou	access	access	notaccess	yes	yes	no	yes	(5,12]	0			-2.90353	Low SEP	1	negative
month4	7238	2020	Male	2022-08-05	12	Tanene	[22,35)	2	no_formal_education	married	commerçant	soussou	notaccess	access	notaccess	yes	yes	no	no	(12,35]	0			-2.11018	Middle SEP	2	negative
month4	7239	2020	Male	2022-08-18	13	Maire_daouda	[35,50)	2	no_formal_education	single	commerçant	autres	access	notaccess	access	no	no	no	no	(5,12]	0			7.10382	High SEP	2	negative
month4	7243	2018	Male	2022-08-09	14.2	Tanene	[22,35)	2	no_formal_education	married	unemployed	soussou	notaccess	notaccess	access	yes	yes	yes	yes	[3,5]	0			-1.55379	Middle SEP	4	negative
month4	7245	2018	Female	2022-08-09	11.2	Tanene	[22,35)	2	no_formal_education	married	unemployed	soussou	notaccess	notaccess	access	yes	yes	yes	yes	[3,5]	0			-1.55354	Middle SEP	4	negative
month4	7246	2020	Female	2022-08-04	17.1	Tanene	[22,35)	2	no_formal_education	married	unemployed	soussou	access	access	access	yes	yes	no	yes	(5,12]	0			0.0412568	High SEP	2	negative
month4	7250	2018	Male	2022-08-04	12.8	Tanene	[22,35)	2	primary	married	unemployed	soussou	access	access	notaccess	no	no	no	yes	[3,5]	0			-1.81799	Middle SEP	4	negative
month4	7253	2020	Female	2022-08-01	10.1	Olympio	[50,77]	1	secondary	married	agriculteur	soussou	access	access	notaccess	yes	yes	no	no	(12,35]	0			-0.912279	Middle SEP	2	negative
month4	7255	2019	Male	2022-08-01	8.4	Kimara	[50,77]	2	secondary	married	unemployed	soussou	access	access	access	yes	yes	no	yes	(5,12]	0			-3.66317	Low SEP	3	negative
month4	7256	2020	Female	2022-08-01	8.9	Kimara	[50,77]	2	secondary	married	unemployed	soussou	access	access	access	yes	yes	no	yes	(5,12]	0			-3.66304	Low SEP	2	negative
month4	7257	2021	Female	2022-08-02	13.3	Foulawa	[35,50)	1	no_formal_education	married	commerçant	peulh	notaccess	access	notaccess	no	no	no	no	(5,12]	0			7.10607	High SEP	1	negative
month4	7261	2018	Male	2022-08-02	6.6	Layah	[22,35)	2	no_formal_education	married	unemployed	peulh	notaccess	notaccess	access	no	no	no	yes	[3,5]	0			0.516335	High SEP	4	negative
month4	7262	2020	Male	2022-08-02	12.2	Layah	[22,35)	2	no_formal_education	married	unemployed	peulh	notaccess	notaccess	access	no	no	no	yes	[3,5]	0			0.516459	High SEP	2	negative
month4	7263	2019	Male	2022-08-01	12.4	Kimara	[35,50)	2	primary	married	unemployed	autres	access	access	access	yes	yes	no	yes	[3,5]	0			-3.13507	Low SEP	3	negative
month4	7264	2021	Male	2022-08-01	13	Kimara	[35,50)	2	primary	married	unemployed	autres	access	access	access	yes	yes	no	yes	[3,5]	0			-3.13495	Low SEP	1	negative
month4	7279	2018	Female	2022-08-09	12.1	Sarata	[50,77]	1	no_formal_education	married	agriculteur	soussou	notaccess	notaccess	notaccess	yes	yes	no	yes	[3,5]	0			-1.57318	Middle SEP	4	negative
month4	7281	2018	Female	2022-08-09	12.9	Sarata	[35,50)	2	secondary	single	commerçant	soussou	notaccess	notaccess	notaccess	yes	yes	no	yes	(12,35]	0			-0.579929	Middle SEP	4	negative
month4	7282	2021	Female	2022-08-09	12.3	Sarata	[35,50)	2	secondary	single	commerçant	soussou	notaccess	notaccess	notaccess	yes	yes	no	yes	(12,35]	0			-0.579804	Middle SEP	1	negative
month4	7294	2018	Female	2022-08-05	11.2	Maire_daouda	[35,50)	1	no_formal_education	married	fonctionnaire	peulh	access	notaccess	access	no	no	no	no	(5,12]	0			7.11069	High SEP	4	negative
month4	7307	2021	Female	2022-08-09	15.9	Sarata	[35,50)	1	secondary	married	unemployed	peulh	access	access	access	yes	yes	yes	yes	[3,5]	0			-1.1119	Middle SEP	1	negative
month4	7308	2021	Male	2022-08-09	13.4	Sarata	[35,50)	1	secondary	married	unemployed	peulh	access	access	access	yes	yes	yes	yes	[3,5]	0			-1.11178	Middle SEP	1	negative
month4	7321	2019	Female	2022-08-04	12.7	Sarata	[35,50)	1	secondary	married	unemployed	peulh	access	access	access	yes	yes	yes	yes	[3,5]	0			-1.11016	Middle SEP	3	negative
month4	7325	2019	Male	2022-08-12	12.2	Layah	[35,50)	2	no_formal_education	married	commerçant	soussou	notaccess	notaccess	notaccess	no	no	no	no	(5,12]	0			7.11455	High SEP	3	negative
month4	7333	2019	Male	2022-08-01	11.5	Kimara	[50,77]	1	secondary	married	unemployed	soussou	access	access	notaccess	yes	yes	no	yes	(12,35]	7454	0	Pf	-2.47526	Low SEP	3	positive
month4	7342	2018	Male	2022-08-17	13.2	Hafia	[22,35)	2	primary	married	commerçant	soussou	access	access	notaccess	yes	yes	no	no	(5,12]	0			-2.44842	Low SEP	4	negative
month4	7346	2020	Male	2022-08-11	13.3	Layah	[35,50)	2	no_formal_education	married	commerçant	soussou	notaccess	notaccess	notaccess	yes	yes	no	yes	[3,5]	0			-0.666261	Middle SEP	2	negative
month4	7356	2021	Female	2022-08-11	6.7	Layah	[50,77]	2	secondary	married	unemployed	soussou	access	access	notaccess	yes	yes	no	no	(5,12]	0			-1.94947	Middle SEP	1	negative
month4	7360	2018	Male	2022-08-16	8.5	Layah	[22,35)	2	secondary	married	unemployed	soussou	notaccess	access	access	no	no	no	no	(5,12]	0			-3.2803	Low SEP	4	negative
month4	7362	2020	Female	2022-08-17	11.2	Hafia	[22,35)	2	secondary	married	unemployed	autres	notaccess	access	notaccess	no	no	no	no	[3,5]	0			-2.14861	Low SEP	2	negative
month4	7363	2021	Female	2022-08-17	9.6	Hafia	[22,35)	2	secondary	married	unemployed	autres	notaccess	access	notaccess	no	no	no	no	[3,5]	0			-2.14849	Low SEP	1	negative
month4	7364	2021	Male	2022-08-08	11.6	Maire_daouda	[22,35)	2	secondary	married	fonctionnaire	peulh	access	access	access	yes	no	yes	yes	(5,12]	0			-1.17798	Middle SEP	1	negative
month4	7365	2019	Female	2022-08-08	13.3	Maire_daouda	[22,35)	2	secondary	married	fonctionnaire	peulh	access	access	access	yes	no	yes	yes	(5,12]	0			-1.17785	Middle SEP	3	negative
month4	7366	2019	Male	2022-08-08	12.9	Maire_daouda	[22,35)	2	secondary	married	fonctionnaire	peulh	access	access	access	yes	no	yes	yes	(5,12]	0			-1.17773	Middle SEP	3	negative
month4	7367	2020	Male	2022-08-08	12.3	Maire_daouda	[22,35)	2	secondary	married	fonctionnaire	peulh	access	access	access	yes	no	yes	yes	(5,12]	0			-1.1776	Middle SEP	2	negative
month4	7370	2020	Female	2022-08-16	13.4	Hafia	[22,35)	2	secondary	married	unemployed	soussou	notaccess	access	access	no	no	no	yes	[3,5]	0			-3.18246	Low SEP	2	negative
month4	7377	2018	Male	2022-08-11	15	Layah	[22,35)	2	primary	single	unemployed	soussou	access	access	access	no	no	no	yes	[3,5]	0			0.349824	High SEP	4	negative
month4	7381	2019	Male	2022-08-16	14.4	Layah	[35,50)	1	no_formal_education	married	fonctionnaire	peulh	access	notaccess	notaccess	no	no	no	no	(5,12]	0			7.12154	High SEP	3	negative
month4	7385	2019	Male	2022-08-19	13.8	Hafia	[50,77]	2	no_formal_education	single	commerçant	autres	notaccess	notaccess	notaccess	yes	yes	no	no	(5,12]	0			-0.715892	Middle SEP	3	negative
month4	7386	2020	Male	2022-08-19	10.6	Loumafori	[50,77]	1	no_formal_education	married	unemployed	peulh	notaccess	access	notaccess	yes	yes	no	no	(12,35]	0			-3.06589	Low SEP	2	negative
month5	7002	2020	Female	2022-09-05	16.8	Carrefour_Fodéyah	[50,77]	1	secondary	married	fonctionnaire	peulh	access	notaccess	notaccess	yes	yes	no	yes	[3,5]	0			-3.62044	Low SEP	2	negative
month5	7019	2018	Female	2022-09-05	10.9	Foulawa	[35,50)	1	secondary	married	fonctionnaire	peulh	notaccess	access	access	yes	no	no	no	(5,12]	0			0.081847	High SEP	4	negative
month5	7020	2018	Male	2022-09-05	12.5	Foulawa	[35,50)	1	secondary	married	fonctionnaire	peulh	notaccess	access	access	yes	no	no	no	(5,12]	0			0.0819717	High SEP	4	negative
month5	7032	2021	Female	2022-09-05	15.6	Foulawa	[22,35)	2	secondary	married	fonctionnaire	peulh	notaccess	access	access	yes	yes	no	no	[3,5]	0			-0.377383	Middle SEP	1	negative
month5	7034	2019	Male	2022-09-05	12	Foulawa	[22,35)	2	secondary	married	fonctionnaire	peulh	notaccess	access	access	yes	yes	no	no	[3,5]	0			-0.377134	Middle SEP	3	negative
month5	7039	2020	Female	2022-09-05	11.4	Hafia	[22,35)	2	secondary	married	commerçant	peulh	notaccess	notaccess	access	yes	yes	no	yes	[3,5]	0			-2.24533	Low SEP	2	negative
month5	7040	2018	Male	2022-09-06	11.9	Foulawa	[50,77]	1	secondary	married	fonctionnaire	peulh	access	access	access	no	no	no	no	(5,12]	143	0	Pf	-4.26929	Low SEP	4	positive
month5	7042	2018	Female	2022-09-07	11.1	Foulawa	[50,77]	1	secondary	married	fonctionnaire	peulh	access	access	access	no	no	no	no	(5,12]	0			-4.26904	Low SEP	4	negative
month5	7044	2020	Female	2022-09-12	8.8	Layah	[22,35)	2	secondary	single	unemployed	soussou	access	access	access	yes	yes	no	yes	(5,12]	0			0.873086	High SEP	2	negative
month5	7053	2018	Male	2022-09-12	10.1	Layah	[50,77]	2	no_formal_education	married	unemployed	soussou	notaccess	access	access	no	no	no	yes	(5,12]	0			-2.88488	Low SEP	4	negative
month5	7058	2019	Male	2022-09-19	10.2	Carrefour_Fodéyah	[35,50)	1	primary	married	unemployed	soussou	access	access	access	no	no	no	no	(5,12]	0			7.08125	High SEP	3	negative
month5	7067	2018	Female	2022-09-12	10.6	Layah	[35,50)	2	secondary	married	unemployed	soussou	access	access	access	no	no	no	yes	[3,5]	0			-2.07994	Middle SEP	4	negative
month5	7075	2019	Female	2022-09-12	11.8	Layah	[35,50)	2	secondary	married	fonctionnaire	soussou	access	access	notaccess	yes	yes	no	no	(5,12]	0			-1.49014	Middle SEP	3	negative
month5	7079	2021	Female	2022-09-12	13.6	Sarata	[50,77]	2	no_formal_education	married	agriculteur	autres	access	access	access	yes	yes	no	yes	(12,35]	0			-0.376221	Middle SEP	1	negative
month5	7082	2019	Male	2022-09-12	12.8	Layah	[35,50)	2	no_formal_education	married	unemployed	soussou	access	access	notaccess	yes	yes	no	no	(5,12]	0			0.643152	High SEP	3	negative
month5	7083	2019	Male	2022-09-12	12.5	Layah	[35,50)	2	no_formal_education	married	unemployed	soussou	access	access	notaccess	yes	yes	no	no	(5,12]	0			0.643277	High SEP	3	negative
month5	7085	2018	Male	2022-09-12	10.2	Layah	[35,50)	2	no_formal_education	married	unemployed	soussou	access	access	notaccess	yes	yes	no	no	(5,12]	121	0	Pf	0.643526	High SEP	4	positive
month5	7086	2020	Female	2022-09-12	11.4	Layah	[35,50)	2	no_formal_education	married	unemployed	soussou	access	access	notaccess	yes	yes	no	no	(5,12]	0			0.643651	High SEP	2	negative
month5	7090	2020	Female	2022-09-07	13.3	Olympio	[22,35)	2	secondary	single	unemployed	autres	notaccess	access	access	yes	yes	no	yes	(5,12]	0			-3.96978	Low SEP	2	negative
month5	7106	2020	Male	2022-09-07	12.1	Sarata	[22,35)	2	no_formal_education	married	unemployed	soussou	notaccess	notaccess	access	no	no	no	no	(5,12]	0			7.08723	High SEP	2	negative
month5	7120	2018	Female	2022-09-07	10.1	Tanene	[22,35)	2	no_formal_education	married	unemployed	soussou	notaccess	notaccess	access	yes	yes	no	no	[3,5]	0			-0.993959	Middle SEP	4	negative
month5	7123	2020	Female	2022-09-07	11.7	Tanene	[22,35)	2	no_formal_education	married	unemployed	soussou	notaccess	notaccess	access	yes	yes	no	no	[3,5]	462	0	Pf	-0.993585	Middle SEP	2	positive
month5	7128	2018	Male	2022-09-08	11.3	Olympio	[50,77]	1	secondary	married	agriculteur	soussou	access	access	notaccess	yes	yes	no	no	(12,35]	0			-0.927872	Middle SEP	4	negative
month5	7164	2020	Male	2022-09-13	10.1	Loumafori	[50,77]	1	secondary	married	unemployed	soussou	access	access	access	yes	yes	no	yes	(5,12]	0			-0.429652	Middle SEP	2	negative
month5	7167	2018	Male	2022-09-13	9.4	Loumafori	[50,77]	1	secondary	married	unemployed	soussou	access	access	access	yes	yes	no	yes	(5,12]	0			-0.429278	Middle SEP	4	negative
month5	7175	2018	Female	2022-09-22	11.5	Carrefour_Fodéyah	[50,77]	1	secondary	married	fonctionnaire	peulh	access	notaccess	notaccess	yes	no	no	yes	(12,35]	0			-3.08041	Low SEP	4	negative
month5	7176	2019	Female	2022-09-22	11.5	Carrefour_Fodéyah	[50,77]	1	secondary	married	fonctionnaire	peulh	access	notaccess	notaccess	yes	no	no	yes	(12,35]	0			-3.08029	Low SEP	3	negative
month5	7185	2018	Male	2022-09-22	12.4	Carrefour_Fodéyah	[22,35)	1	secondary	married	unemployed	soussou	notaccess	access	access	no	no	no	no	(5,12]	0			7.09709	High SEP	4	negative
month5	7192	2020	Male	2022-09-22	13.4	Carrefour_Fodéyah	[35,50)	1	primary	married	unemployed	soussou	access	access	access	no	no	no	yes	(12,35]	0			-0.226339	Middle SEP	2	negative
month5	7209	2021	Male	2022-09-07	11.2	Tanene	[22,35)	2	primary	married	unemployed	soussou	access	access	notaccess	no	no	no	yes	[3,5]	0			-3.82775	Low SEP	1	negative
month5	7226	2021	Female	2022-09-07	10.33	Olympio	[50,77]	1	secondary	married	agriculteur	soussou	access	access	notaccess	yes	yes	no	yes	(5,12]	0			-2.90353	Low SEP	1	negative
month5	7238	2020	Male	2022-09-07	11.5	Tanene	[22,35)	2	no_formal_education	married	commerçant	soussou	notaccess	access	notaccess	yes	yes	no	no	(12,35]	0			-2.11018	Middle SEP	2	negative
month5	7239	2020	Male	2022-09-07	12.5	Foulawa	[35,50)	1	no_formal_education	married	commerçant	peulh	notaccess	access	notaccess	no	no	no	no	(5,12]	0			7.10382	High SEP	2	negative
month5	7243	2018	Male	2022-09-07	14.1	Tanene	[22,35)	2	no_formal_education	married	unemployed	soussou	notaccess	notaccess	access	yes	yes	yes	yes	[3,5]	0			-1.55379	Middle SEP	4	negative
month5	7245	2018	Female	2022-09-07	10.6	Tanene	[22,35)	2	no_formal_education	married	unemployed	soussou	notaccess	notaccess	access	yes	yes	yes	yes	[3,5]	0			-1.55354	Middle SEP	4	negative
month5	7246	2020	Female	2022-09-07	16	Tanene	[22,35)	2	no_formal_education	married	unemployed	soussou	access	access	access	yes	yes	no	yes	(5,12]	0			0.0412568	High SEP	2	negative
month5	7250	2018	Male	2022-09-08	13.1	Tanene	[22,35)	2	primary	married	unemployed	soussou	access	access	notaccess	no	no	no	yes	[3,5]	0			-1.81799	Middle SEP	4	negative
month5	7253	2020	Female	2022-09-05	9.3	Olympio	[50,77]	1	secondary	married	agriculteur	soussou	access	access	notaccess	yes	yes	no	no	(12,35]	0			-0.912279	Middle SEP	2	negative
month5	7255	2019	Male	2022-09-05	7.9	Kimara	[50,77]	2	secondary	married	unemployed	soussou	access	access	access	yes	yes	no	yes	(5,12]	0			-3.66317	Low SEP	3	negative
month5	7256	2020	Female	2022-09-05	11.8	Kimara	[50,77]	2	secondary	married	unemployed	soussou	access	access	access	yes	yes	no	yes	(5,12]	0			-3.66304	Low SEP	2	negative
month5	7257	2021	Female	2022-09-05	10.8	Maire_daouda	[35,50)	2	no_formal_education	single	commerçant	autres	access	notaccess	access	no	no	no	no	(5,12]	0			7.10607	High SEP	1	negative
month5	7261	2018	Male	2022-09-05	8.8	Layah	[22,35)	2	no_formal_education	married	unemployed	peulh	notaccess	notaccess	access	no	no	no	yes	[3,5]	0			0.516335	High SEP	4	negative
month5	7262	2020	Male	2022-09-05	12.8	Layah	[22,35)	2	no_formal_education	married	unemployed	peulh	notaccess	notaccess	access	no	no	no	yes	[3,5]	0			0.516459	High SEP	2	negative
month5	7263	2019	Male	2022-09-05	10.3	Kimara	[35,50)	2	primary	married	unemployed	autres	access	access	access	yes	yes	no	yes	[3,5]	0			-3.13507	Low SEP	3	negative
month5	7264	2021	Male	2022-09-05	13.8	Kimara	[35,50)	2	primary	married	unemployed	autres	access	access	access	yes	yes	no	yes	[3,5]	0			-3.13495	Low SEP	1	negative
month5	7279	2018	Female	2022-09-09	10.8	Sarata	[50,77]	1	no_formal_education	married	agriculteur	soussou	notaccess	notaccess	notaccess	yes	yes	no	yes	[3,5]	0			-1.57318	Middle SEP	4	negative
month5	7281	2018	Female	2022-09-12	14.8	Sarata	[35,50)	2	secondary	single	commerçant	soussou	notaccess	notaccess	notaccess	yes	yes	no	yes	(12,35]	0			-0.579929	Middle SEP	4	negative
month5	7282	2021	Female	2022-09-12	14.1	Sarata	[35,50)	2	secondary	single	commerçant	soussou	notaccess	notaccess	notaccess	yes	yes	no	yes	(12,35]	0			-0.579804	Middle SEP	1	negative
month5	7294	2018	Female	2022-09-09	12.2	Olympio	[35,50)	1	primary	married	agriculteur	soussou	access	access	notaccess	no	no	no	no	(5,12]	0			7.11069	High SEP	4	negative
month5	7307	2021	Female	2022-09-09	14.3	Sarata	[35,50)	1	secondary	married	unemployed	peulh	access	access	access	yes	yes	yes	yes	[3,5]	0			-1.1119	Middle SEP	1	negative
month5	7308	2021	Male	2022-09-09	13.5	Sarata	[35,50)	1	secondary	married	unemployed	peulh	access	access	access	yes	yes	yes	yes	[3,5]	0			-1.11178	Middle SEP	1	negative
month5	7321	2019	Female	2022-09-09	11.9	Sarata	[35,50)	1	secondary	married	unemployed	peulh	access	access	access	yes	yes	yes	yes	[3,5]	0			-1.11016	Middle SEP	3	negative
month5	7325	2019	Male	2022-09-12	9.9	Layah	[35,50)	2	no_formal_education	married	commerçant	soussou	notaccess	notaccess	notaccess	no	no	no	no	(5,12]	0			7.11455	High SEP	3	negative
month5	7333	2019	Male	2022-09-06	10.6	Kimara	[50,77]	1	secondary	married	unemployed	soussou	access	access	notaccess	yes	yes	no	yes	(12,35]	0			-2.47526	Low SEP	3	negative
month5	7342	2018	Male	2022-09-21	13.4	Hafia	[22,35)	2	primary	married	commerçant	soussou	access	access	notaccess	yes	yes	no	no	(5,12]	0			-2.44842	Low SEP	4	negative
month5	7346	2020	Male	2022-09-12	13.3	Layah	[35,50)	2	no_formal_education	married	commerçant	soussou	notaccess	notaccess	notaccess	yes	yes	no	yes	[3,5]	0			-0.666261	Middle SEP	2	negative
month5	7360	2018	Male	2022-09-14	9.4	Layah	[22,35)	2	secondary	married	unemployed	soussou	notaccess	access	access	no	no	no	no	(5,12]	0			-3.2803	Low SEP	4	negative
month5	7362	2020	Female	2022-09-20	10.9	Hafia	[22,35)	2	secondary	married	unemployed	autres	notaccess	access	notaccess	no	no	no	no	[3,5]	0			-2.14861	Low SEP	2	negative
month5	7363	2021	Female	2022-09-20	11.5	Hafia	[22,35)	2	secondary	married	unemployed	autres	notaccess	access	notaccess	no	no	no	no	[3,5]	0			-2.14849	Low SEP	1	negative
month5	7364	2021	Male	2022-09-09	14.7	Maire_daouda	[22,35)	2	secondary	married	fonctionnaire	peulh	access	access	access	yes	no	yes	yes	(5,12]	0			-1.17798	Middle SEP	1	negative
month5	7365	2019	Female	2022-09-09	14.2	Maire_daouda	[22,35)	2	secondary	married	fonctionnaire	peulh	access	access	access	yes	no	yes	yes	(5,12]	0			-1.17785	Middle SEP	3	negative
month5	7366	2019	Male	2022-09-09	12.6	Maire_daouda	[22,35)	2	secondary	married	fonctionnaire	peulh	access	access	access	yes	no	yes	yes	(5,12]	0			-1.17773	Middle SEP	3	negative
month5	7367	2020	Male	2022-09-09	13.6	Maire_daouda	[22,35)	2	secondary	married	fonctionnaire	peulh	access	access	access	yes	no	yes	yes	(5,12]	0			-1.1776	Middle SEP	2	negative
month5	7369	2019	Female	2022-09-21	12.8	Hafia	[22,35)	2	secondary	married	unemployed	soussou	notaccess	access	access	no	no	no	yes	[3,5]	0			-3.18259	Low SEP	3	negative
month5	7370	2020	Female	2022-09-21	11.3	Hafia	[22,35)	2	secondary	married	unemployed	soussou	notaccess	access	access	no	no	no	yes	[3,5]	0			-3.18246	Low SEP	2	negative
month5	7377	2018	Male	2022-09-12	12.6	Layah	[22,35)	2	primary	single	unemployed	soussou	access	access	access	no	no	no	yes	[3,5]	0			0.349824	High SEP	4	negative
month5	7381	2019	Male	2022-09-13	13.4	Sarata	[35,50)	1	no_formal_education	married	commerçant	soussou	notaccess	notaccess	notaccess	no	no	no	no	(5,12]	0			7.12154	High SEP	3	negative
month5	7385	2019	Male	2022-09-23	11.3	Hafia	[50,77]	2	no_formal_education	single	commerçant	autres	notaccess	notaccess	notaccess	yes	yes	no	no	(5,12]	0			-0.715892	Middle SEP	3	negative
month5	7386	2020	Male	2022-09-23	11.3	Loumafori	[50,77]	1	no_formal_education	married	unemployed	peulh	notaccess	access	notaccess	yes	yes	no	no	(12,35]	0			-3.06589	Low SEP	2	negative
month6	7009	2021	Female	2022-10-25	14.6	Foulawa	[50,77]	1	secondary	married	unemployed	peulh	notaccess	access	access	yes	yes	no	yes	(5,12]	0			-3.45234	Low SEP	1	negative
month6	7012	2020	Male	2022-10-25	11.2	Foulawa	[50,77]	1	secondary	married	unemployed	peulh	notaccess	access	access	yes	yes	no	yes	(5,12]	0			-3.45196	Low SEP	2	negative
month6	7019	2019	Female	2022-10-24	10.4	Foulawa	[35,50)	1	secondary	married	fonctionnaire	peulh	notaccess	access	access	yes	no	no	no	(5,12]	0			0.081847	High SEP	3	negative
month6	7024	2021	Female	2022-10-24	10.4	Foulawa	[50,77]	1	no_formal_education	married	agriculteur	peulh	notaccess	notaccess	notaccess	no	no	no	no	(5,12]	0			7.07701	High SEP	1	negative
month6	7026	2018	Female	2022-10-24	13.8	Foulawa	[50,77]	1	no_formal_education	married	agriculteur	peulh	notaccess	notaccess	notaccess	no	no	no	no	(5,12]	0			7.07725	High SEP	4	negative
month6	7027	2019	Male	2022-10-24	13.2	Foulawa	[50,77]	1	no_formal_education	married	agriculteur	peulh	notaccess	notaccess	notaccess	no	no	no	no	(5,12]	0			7.07738	High SEP	3	negative
month6	7032	2021	Male	2022-10-24	15	Foulawa	[22,35)	2	secondary	married	fonctionnaire	peulh	notaccess	access	access	yes	yes	no	no	[3,5]	6430	0	Pf	-0.377383	Middle SEP	1	positive
month6	7038	2020	Female	2022-10-25	12.8	Hafia	[22,35)	2	secondary	married	commerçant	peulh	notaccess	notaccess	access	yes	yes	no	yes	[3,5]	0			-2.24545	Low SEP	2	negative
month6	7040	2019	Female	2022-10-26	14.7	Foulawa	[50,77]	1	secondary	married	fonctionnaire	peulh	access	access	access	no	no	no	no	(5,12]	0			-4.26929	Low SEP	3	negative
month6	7041	2021	Female	2022-10-26	13.4	Foulawa	[50,77]	1	secondary	married	fonctionnaire	peulh	access	access	access	no	no	no	no	(5,12]	0			-4.26917	Low SEP	1	negative
month6	7044	2020	Female	2022-11-07	9.5	Layah	[22,35)	2	secondary	single	unemployed	soussou	access	access	access	yes	yes	no	yes	(5,12]	0			0.873086	High SEP	2	negative
month6	7053	2018	Male	2022-11-01	8.9	Layah	[50,77]	2	no_formal_education	married	unemployed	soussou	notaccess	access	access	no	no	no	yes	(5,12]	640	0	Pf	-2.88488	Low SEP	4	positive
month6	7058	2019	Male	2022-11-07	12.7	Carrefour_Fodéyah	[35,50)	1	primary	married	unemployed	soussou	access	access	access	no	no	no	no	(5,12]	0			7.08125	High SEP	3	negative
month6	7067	2018	Female	2022-11-03	12	Layah	[35,50)	2	secondary	married	unemployed	soussou	access	access	access	no	no	no	yes	[3,5]	0			-2.07994	Middle SEP	4	negative
month6	7075	2019	Female	2022-11-07	12.7	Layah	[35,50)	2	secondary	married	fonctionnaire	soussou	access	access	notaccess	yes	yes	no	no	(5,12]	0			-1.49014	Middle SEP	3	negative
month6	7079	2021	Female	2022-11-07	12.4	Sarata	[50,77]	2	no_formal_education	married	agriculteur	autres	access	access	access	yes	yes	no	yes	(12,35]	0			-0.376221	Middle SEP	1	negative
month6	7082	2019	Male	2022-11-07	10	Layah	[35,50)	2	no_formal_education	married	unemployed	soussou	access	access	notaccess	yes	yes	no	no	(5,12]	0			0.643152	High SEP	3	negative
month6	7083	2019	Male	2022-11-07	11.6	Layah	[35,50)	2	no_formal_education	married	unemployed	soussou	access	access	notaccess	yes	yes	no	no	(5,12]	0			0.643277	High SEP	3	negative
month6	7085	2018	Male	2022-11-07	12.5	Layah	[35,50)	2	no_formal_education	married	unemployed	soussou	access	access	notaccess	yes	yes	no	no	(5,12]	0			0.643526	High SEP	4	negative
month6	7086	2020	Female	2022-11-07	11	Layah	[35,50)	2	no_formal_education	married	unemployed	soussou	access	access	notaccess	yes	yes	no	no	(5,12]	0			0.643651	High SEP	2	negative
month6	7106	2020	Male	2022-10-28	11.5	Sarata	[22,35)	2	no_formal_education	married	unemployed	soussou	notaccess	notaccess	access	no	no	no	no	(5,12]	0			7.08723	High SEP	2	negative
month6	7120	2018	Female	2022-10-31	10.5	Tanene	[22,35)	2	no_formal_education	married	unemployed	soussou	notaccess	notaccess	access	yes	yes	no	no	[3,5]	0			-0.993959	Middle SEP	4	negative
month6	7123	2020	Female	2022-10-28	11.4	Tanene	[22,35)	2	no_formal_education	married	unemployed	soussou	notaccess	notaccess	access	yes	yes	no	no	[3,5]	0			-0.993585	Middle SEP	2	negative
month6	7128	2018	Male	2022-10-28	10	Olympio	[50,77]	1	secondary	married	agriculteur	soussou	access	access	notaccess	yes	yes	no	no	(12,35]	0			-0.927872	Middle SEP	4	negative
month6	7150	2020	Male	2022-11-08	12.5	Loumafori	[50,77]	1	secondary	married	unemployed	autres	access	access	access	yes	yes	no	yes	(12,35]	0			-2.52137	Low SEP	2	negative
month6	7164	2020	Male	2022-11-09	10.4	Loumafori	[50,77]	1	secondary	married	unemployed	soussou	access	access	access	yes	yes	no	yes	(5,12]	0			-0.429652	Middle SEP	2	negative
month6	7167	2018	Male	2022-11-09	9.1	Loumafori	[50,77]	1	secondary	married	unemployed	soussou	access	access	access	yes	yes	no	yes	(5,12]	0			-0.429278	Middle SEP	4	negative
month6	7175	2018	Female	2022-11-15	10.6	Carrefour_Fodéyah	[50,77]	1	secondary	married	fonctionnaire	peulh	access	notaccess	notaccess	yes	no	no	yes	(12,35]	0			-3.08041	Low SEP	4	negative
month6	7176	2019	Female	2022-11-15	10.2	Carrefour_Fodéyah	[50,77]	1	secondary	married	fonctionnaire	peulh	access	notaccess	notaccess	yes	no	no	yes	(12,35]	0			-3.08029	Low SEP	3	negative
month6	7185	2018	Male	2022-11-15	13.1	Carrefour_Fodéyah	[22,35)	1	secondary	married	unemployed	soussou	notaccess	access	access	no	no	no	no	(5,12]	0			7.09709	High SEP	4	negative
month6	7192	2020	Male	2022-11-17	11.2	Carrefour_Fodéyah	[35,50)	1	primary	married	unemployed	soussou	access	access	access	no	no	no	yes	(12,35]	160	0	Pf	-0.226339	Middle SEP	2	positive
month6	7209	2021	Male	2022-11-01	11.8	Tanene	[22,35)	2	primary	married	unemployed	soussou	access	access	notaccess	no	no	no	yes	[3,5]	0			-3.82775	Low SEP	1	negative
month6	7222	2018	Female	2022-11-01	10.3	Olympio	[50,77]	1	secondary	married	agriculteur	soussou	access	access	notaccess	yes	yes	no	yes	(5,12]	0			-2.90403	Low SEP	4	negative
month6	7226	2021	Female	2022-11-01	11.8	Olympio	[50,77]	1	secondary	married	agriculteur	soussou	access	access	notaccess	yes	yes	no	yes	(5,12]	0			-2.90353	Low SEP	1	negative
month6	7231	2020	Male	2022-10-26	12	Olympio	[50,77]	1	secondary	married	agriculteur	soussou	access	access	notaccess	yes	yes	no	yes	(5,12]	0			-2.9029	Low SEP	2	negative
month6	7238	2020	Male	2022-11-17	10.6	Tanene	[22,35)	2	no_formal_education	married	commerçant	soussou	notaccess	access	notaccess	yes	yes	no	no	(12,35]	20800	0	Pf	-2.11018	Middle SEP	2	positive
month6	7239	2020	Male	2022-10-31	12.7	Layah	[35,50)	2	no_formal_education	married	unemployed	soussou	access	access	access	no	no	no	no	(5,12]	0			7.10382	High SEP	2	negative
month6	7245	2018	Female	2022-10-31	10.8	Tanene	[22,35)	2	no_formal_education	married	unemployed	soussou	notaccess	notaccess	access	yes	yes	yes	yes	[3,5]	0			-1.55354	Middle SEP	4	negative
month6	7246	2020	Female	2022-11-02	15.7	Tanene	[22,35)	2	no_formal_education	married	unemployed	soussou	access	access	access	yes	yes	no	yes	(5,12]	0			0.0412568	High SEP	2	negative
month6	7250	2018	Male	2022-10-31	11.9	Tanene	[22,35)	2	primary	married	unemployed	soussou	access	access	notaccess	no	no	no	yes	[3,5]	0			-1.81799	Middle SEP	4	negative
month6	7253	2020	Female	2022-10-26	10.8	Olympio	[50,77]	1	secondary	married	agriculteur	soussou	access	access	notaccess	yes	yes	no	no	(12,35]	0			-0.912279	Middle SEP	2	negative
month6	7255	2019	Male	2022-10-26	10.4	Kimara	[50,77]	2	secondary	married	unemployed	soussou	access	access	access	yes	yes	no	yes	(5,12]	0			-3.66317	Low SEP	3	negative
month6	7256	2020	Female	2022-10-26	11.7	Kimara	[50,77]	2	secondary	married	unemployed	soussou	access	access	access	yes	yes	no	yes	(5,12]	0			-3.66304	Low SEP	2	negative
month6	7257	2021	Female	2022-10-28	11.1	Layah	[35,50)	2	no_formal_education	married	commerçant	soussou	notaccess	notaccess	notaccess	no	no	no	no	(5,12]	0			7.10607	High SEP	1	negative
month6	7261	2018	Male	2022-10-28	13	Layah	[22,35)	2	no_formal_education	married	unemployed	peulh	notaccess	notaccess	access	no	no	no	yes	[3,5]	6438	0	Pf	0.516335	High SEP	4	positive
month6	7262	2020	Male	2022-10-28	12.9	Layah	[22,35)	2	no_formal_education	married	unemployed	peulh	notaccess	notaccess	access	no	no	no	yes	[3,5]	0			0.516459	High SEP	2	negative
month6	7263	2019	Male	2022-10-26	12.8	Kimara	[35,50)	2	primary	married	unemployed	autres	access	access	access	yes	yes	no	yes	[3,5]	0			-3.13507	Low SEP	3	negative
month6	7264	2021	Male	2022-10-26	14	Kimara	[35,50)	2	primary	married	unemployed	autres	access	access	access	yes	yes	no	yes	[3,5]	0			-3.13495	Low SEP	1	negative
month6	7279	2018	Female	2022-11-03	12	Sarata	[50,77]	1	no_formal_education	married	agriculteur	soussou	notaccess	notaccess	notaccess	yes	yes	no	yes	[3,5]	0			-1.57318	Middle SEP	4	negative
month6	7281	2018	Female	2022-11-03	12.3	Sarata	[35,50)	2	secondary	single	commerçant	soussou	notaccess	notaccess	notaccess	yes	yes	no	yes	(12,35]	0			-0.579929	Middle SEP	4	negative
month6	7282	2021	Female	2022-11-03	12.2	Sarata	[35,50)	2	secondary	single	commerçant	soussou	notaccess	notaccess	notaccess	yes	yes	no	yes	(12,35]	0			-0.579804	Middle SEP	1	negative
month6	7294	2018	Female	2022-11-24	11.5	Foulawa	[35,50)	1	no_formal_education	married	commerçant	peulh	notaccess	access	notaccess	no	no	no	no	(5,12]	0			7.11069	High SEP	4	negative
month6	7300	2018	Male	2022-11-03	11	Sarata	[50,77]	1	secondary	married	unemployed	soussou	access	access	access	yes	yes	no	no	(12,35]	0			-0.937562	Middle SEP	4	negative
month6	7307	2021	Female	2022-11-03	12.4	Sarata	[35,50)	1	secondary	married	unemployed	peulh	access	access	access	yes	yes	yes	yes	[3,5]	0			-1.1119	Middle SEP	1	negative
month6	7308	2021	Male	2022-11-03	11.1	Sarata	[35,50)	1	secondary	married	unemployed	peulh	access	access	access	yes	yes	yes	yes	[3,5]	0			-1.11178	Middle SEP	1	negative
month6	7321	2019	Female	2022-11-03	10.2	Sarata	[35,50)	1	secondary	married	unemployed	peulh	access	access	access	yes	yes	yes	yes	[3,5]	0			-1.11016	Middle SEP	3	negative
month6	7325	2019	Male	2022-12-07	12.4	Layah	[35,50)	2	no_formal_education	married	commerçant	soussou	notaccess	notaccess	notaccess	no	no	no	no	(5,12]	0			7.11455	High SEP	3	negative
month6	7333	2019	Male	2022-10-26	12.3	Kimara	[50,77]	1	secondary	married	unemployed	soussou	access	access	notaccess	yes	yes	no	yes	(12,35]	0			-2.47526	Low SEP	3	negative
month6	7342	2018	Male	2022-11-10	14.08	Hafia	[22,35)	2	primary	married	commerçant	soussou	access	access	notaccess	yes	yes	no	no	(5,12]	0			-2.44842	Low SEP	4	negative
month6	7360	2018	Male	2022-11-08	11.2	Layah	[22,35)	2	secondary	married	unemployed	soussou	notaccess	access	access	no	no	no	no	(5,12]	0			-3.2803	Low SEP	4	negative
month6	7362	2020	Female	2022-11-10	11	Hafia	[22,35)	2	secondary	married	unemployed	autres	notaccess	access	notaccess	no	no	no	no	[3,5]	0			-2.14861	Low SEP	2	negative
month6	7363	2021	Female	2022-11-10	10.3	Hafia	[22,35)	2	secondary	married	unemployed	autres	notaccess	access	notaccess	no	no	no	no	[3,5]	0			-2.14849	Low SEP	1	negative
month6	7364	2021	Male	2022-11-02	12.4	Maire_daouda	[22,35)	2	secondary	married	fonctionnaire	peulh	access	access	access	yes	no	yes	yes	(5,12]	0			-1.17798	Middle SEP	1	negative
month6	7365	2019	Female	2022-11-02	13	Maire_daouda	[22,35)	2	secondary	married	fonctionnaire	peulh	access	access	access	yes	no	yes	yes	(5,12]	0			-1.17785	Middle SEP	3	negative
month6	7366	2019	Male	2022-11-02	13.7	Maire_daouda	[22,35)	2	secondary	married	fonctionnaire	peulh	access	access	access	yes	no	yes	yes	(5,12]	0			-1.17773	Middle SEP	3	negative
month6	7367	2020	Male	2022-11-02	12.8	Maire_daouda	[22,35)	2	secondary	married	fonctionnaire	peulh	access	access	access	yes	no	yes	yes	(5,12]	0			-1.1776	Middle SEP	2	negative
month6	7369	2019	Female	2022-11-11	12.2	Hafia	[22,35)	2	secondary	married	unemployed	soussou	notaccess	access	access	no	no	no	yes	[3,5]	0			-3.18259	Low SEP	3	negative
month6	7370	2020	Female	2022-11-11	12.4	Hafia	[22,35)	2	secondary	married	unemployed	soussou	notaccess	access	access	no	no	no	yes	[3,5]	0			-3.18246	Low SEP	2	negative
month6	7377	2018	Male	2022-11-07	13.5	Layah	[22,35)	2	primary	single	unemployed	soussou	access	access	access	no	no	no	yes	[3,5]	0			0.349824	High SEP	4	negative
month6	7381	2019	Male	2022-11-08	13.5	Foulawa	[35,50)	1	primary	single	commerçant	peulh	notaccess	access	notaccess	no	no	no	no	(5,12]	0			7.12154	High SEP	3	negative
month6	7385	2019	Male	2022-11-14	13.7	Hafia	[50,77]	2	no_formal_education	single	commerçant	autres	notaccess	notaccess	notaccess	yes	yes	no	no	(5,12]	0			-0.715892	Middle SEP	3	negative
month6	7386	2020	Male	2022-11-14	12.2	Loumafori	[50,77]	1	no_formal_education	married	unemployed	peulh	notaccess	access	notaccess	yes	yes	no	no	(12,35]	0			-3.06589	Low SEP	2	negative
month7	7003	2021	Male	2022-12-15	14.4	Carrefour_Fodéyah	[50,77]	1	secondary	married	fonctionnaire	peulh	access	notaccess	notaccess	yes	yes	no	yes	[3,5]	0			-3.62032	Low SEP	1	negative
month7	7006	2018	Male	2022-12-15	9.8	Foulawa	[35,50)	1	secondary	married	commerçant	peulh	access	access	notaccess	yes	yes	no	yes	(5,12]	0			-1.44802	Middle SEP	4	negative
month7	7010	2020	Female	2022-12-16	12.4	Foulawa	[50,77]	1	secondary	married	unemployed	peulh	notaccess	access	access	yes	yes	no	yes	(5,12]	0			-3.45221	Low SEP	2	negative
month7	7014	2018	Male	2022-12-14	11.9	Foulawa	[50,77]	1	no_formal_education	married	unemployed	peulh	access	access	notaccess	no	no	no	yes	(5,12]	40	0	Pf	-0.420052	Middle SEP	4	positive
month7	7018	2018	Male	2022-12-15	11.8	Carrefour_Fodéyah	[50,77]	1	secondary	married	fonctionnaire	peulh	access	notaccess	notaccess	yes	yes	no	yes	[3,5]	0			-3.61844	Low SEP	4	negative
month7	7026	2020	Female	2022-12-14	13.4	Foulawa	[50,77]	1	no_formal_education	married	agriculteur	peulh	notaccess	notaccess	notaccess	no	no	no	no	(5,12]	0			7.07725	High SEP	2	negative
month7	7027	2020	Female	2022-12-14	11.9	Foulawa	[50,77]	1	no_formal_education	married	agriculteur	peulh	notaccess	notaccess	notaccess	no	no	no	no	(5,12]	0			7.07738	High SEP	2	negative
month7	7036	2020	Male	2022-12-15	12.4	Hafia	[22,35)	2	secondary	married	commerçant	peulh	notaccess	notaccess	access	yes	yes	no	yes	[3,5]	0			-2.2457	Low SEP	2	negative
month7	7038	2021	Female	2022-12-15	13.6	Hafia	[22,35)	2	secondary	married	commerçant	peulh	notaccess	notaccess	access	yes	yes	no	yes	[3,5]	0			-2.24545	Low SEP	1	negative
month7	7041	2019	Male	2022-12-17	13.9	Foulawa	[50,77]	1	secondary	married	fonctionnaire	peulh	access	access	access	no	no	no	no	(5,12]	0			-4.26917	Low SEP	3	negative
month7	7044	2020	Female	2022-12-22	9.2	Layah	[22,35)	2	secondary	single	unemployed	soussou	access	access	access	yes	yes	no	yes	(5,12]	85000	0	Pf	0.873086	High SEP	2	positive
month7	7053	2018	Male	2022-12-22	10.6	Layah	[50,77]	2	no_formal_education	married	unemployed	soussou	notaccess	access	access	no	no	no	yes	(5,12]	0			-2.88488	Low SEP	4	negative
month7	7058	2019	Male	2022-12-22	14.1	Carrefour_Fodéyah	[35,50)	1	primary	married	unemployed	soussou	access	access	access	no	no	no	no	(5,12]	0			7.08125	High SEP	3	negative
month7	7067	2018	Female	2022-12-22	10.2	Layah	[35,50)	2	secondary	married	unemployed	soussou	access	access	access	no	no	no	yes	[3,5]	0			-2.07994	Middle SEP	4	negative
month7	7075	2019	Female	2022-12-22	11.6	Layah	[35,50)	2	secondary	married	fonctionnaire	soussou	access	access	notaccess	yes	yes	no	no	(5,12]	0			-1.49014	Middle SEP	3	negative
month7	7079	2021	Female	2022-12-22	10.2	Sarata	[50,77]	2	no_formal_education	married	agriculteur	autres	access	access	access	yes	yes	no	yes	(12,35]	0			-0.376221	Middle SEP	1	negative
month7	7082	2019	Male	2022-12-22	11.3	Layah	[35,50)	2	no_formal_education	married	unemployed	soussou	access	access	notaccess	yes	yes	no	no	(5,12]	0			0.643152	High SEP	3	negative
month7	7083	2019	Male	2022-12-22	12	Layah	[35,50)	2	no_formal_education	married	unemployed	soussou	access	access	notaccess	yes	yes	no	no	(5,12]	0			0.643277	High SEP	3	negative
month7	7085	2018	Male	2022-12-22	9.4	Layah	[35,50)	2	no_formal_education	married	unemployed	soussou	access	access	notaccess	yes	yes	no	no	(5,12]	0			0.643526	High SEP	4	negative
month7	7086	2020	Female	2022-12-22	9.1	Layah	[35,50)	2	no_formal_education	married	unemployed	soussou	access	access	notaccess	yes	yes	no	no	(5,12]	0			0.643651	High SEP	2	negative
month7	7090	2020	Female	2022-12-16	11.3	Olympio	[22,35)	2	secondary	single	unemployed	autres	notaccess	access	access	yes	yes	no	yes	(5,12]	0			-3.96978	Low SEP	2	negative
month7	7106	2020	Male	2022-12-16	12.5	Sarata	[22,35)	2	no_formal_education	married	unemployed	soussou	notaccess	notaccess	access	no	no	no	no	(5,12]	0			7.08723	High SEP	2	negative
month7	7120	2018	Female	2022-12-16	10.6	Tanene	[22,35)	2	no_formal_education	married	unemployed	soussou	notaccess	notaccess	access	yes	yes	no	no	[3,5]	0			-0.993959	Middle SEP	4	negative
month7	7123	2020	Female	2022-12-16	10.5	Tanene	[22,35)	2	no_formal_education	married	unemployed	soussou	notaccess	notaccess	access	yes	yes	no	no	[3,5]	0			-0.993585	Middle SEP	2	negative
month7	7128	2018	Male	2022-12-16	9.2	Olympio	[50,77]	1	secondary	married	agriculteur	soussou	access	access	notaccess	yes	yes	no	no	(12,35]	0	24	Gf	-0.927872	Middle SEP	4	negative
month7	7150	2020	Male	2022-12-27	11.4	Loumafori	[50,77]	1	secondary	married	unemployed	autres	access	access	access	yes	yes	no	yes	(12,35]	0			-2.52137	Low SEP	2	negative
month7	7164	2020	Male	2022-12-27	11.8	Loumafori	[50,77]	1	secondary	married	unemployed	soussou	access	access	access	yes	yes	no	yes	(5,12]	0			-0.429652	Middle SEP	2	negative
month7	7167	2018	Male	2022-12-27	10.1	Loumafori	[50,77]	1	secondary	married	unemployed	soussou	access	access	access	yes	yes	no	yes	(5,12]	0			-0.429278	Middle SEP	4	negative
month7	7175	2018	Female	2022-12-21	11.7	Carrefour_Fodéyah	[50,77]	1	secondary	married	fonctionnaire	peulh	access	notaccess	notaccess	yes	no	no	yes	(12,35]	0			-3.08041	Low SEP	4	negative
month7	7176	2019	Female	2022-12-21	12.2	Carrefour_Fodéyah	[50,77]	1	secondary	married	fonctionnaire	peulh	access	notaccess	notaccess	yes	no	no	yes	(12,35]	0			-3.08029	Low SEP	3	negative
month7	7185	2018	Male	2022-12-21	12.6	Carrefour_Fodéyah	[22,35)	1	secondary	married	unemployed	soussou	notaccess	access	access	no	no	no	no	(5,12]	0			7.09709	High SEP	4	negative
month7	7192	2020	Male	2022-12-21	11.3	Carrefour_Fodéyah	[35,50)	1	primary	married	unemployed	soussou	access	access	access	no	no	no	yes	(12,35]	0			-0.226339	Middle SEP	2	negative
month7	7209	2021	Male	2022-12-19	12.6	Tanene	[22,35)	2	primary	married	unemployed	soussou	access	access	notaccess	no	no	no	yes	[3,5]	0			-3.82775	Low SEP	1	negative
month7	7222	2018	Female	2022-12-19	13.6	Olympio	[50,77]	1	secondary	married	agriculteur	soussou	access	access	notaccess	yes	yes	no	yes	(5,12]	0			-2.90403	Low SEP	4	negative
month7	7226	2021	Female	2022-12-19	12.8	Olympio	[50,77]	1	secondary	married	agriculteur	soussou	access	access	notaccess	yes	yes	no	yes	(5,12]	0			-2.90353	Low SEP	1	negative
month7	7231	2020	Male	2022-12-19	12.8	Olympio	[50,77]	1	secondary	married	agriculteur	soussou	access	access	notaccess	yes	yes	no	yes	(5,12]	0			-2.9029	Low SEP	2	negative
month7	7243	2018	Male	2022-12-28	14	Tanene	[22,35)	2	no_formal_education	married	unemployed	soussou	notaccess	notaccess	access	yes	yes	yes	yes	[3,5]	0			-1.55379	Middle SEP	4	negative
month7	7245	2018	Female	2022-12-28	10.2	Tanene	[22,35)	2	no_formal_education	married	unemployed	soussou	notaccess	notaccess	access	yes	yes	yes	yes	[3,5]	0			-1.55354	Middle SEP	4	negative
month7	7246	2020	Female	2022-12-20	15.3	Tanene	[22,35)	2	no_formal_education	married	unemployed	soussou	access	access	access	yes	yes	no	yes	(5,12]	0			0.0412568	High SEP	2	negative
month7	7250	2018	Male	2022-12-19	14.1	Tanene	[22,35)	2	primary	married	unemployed	soussou	access	access	notaccess	no	no	no	yes	[3,5]	0			-1.81799	Middle SEP	4	negative
month7	7253	2020	Female	2022-12-14	12.6	Olympio	[50,77]	1	secondary	married	agriculteur	soussou	access	access	notaccess	yes	yes	no	no	(12,35]	0			-0.912279	Middle SEP	2	negative
month7	7255	2019	Male	2022-12-14	11.2	Kimara	[50,77]	2	secondary	married	unemployed	soussou	access	access	access	yes	yes	no	yes	(5,12]	0			-3.66317	Low SEP	3	negative
month7	7256	2020	Female	2022-12-14	11.4	Kimara	[50,77]	2	secondary	married	unemployed	soussou	access	access	access	yes	yes	no	yes	(5,12]	0			-3.66304	Low SEP	2	negative
month7	7257	2021	Female	2022-12-20	11.6	Sarata	[35,50)	2	no_formal_education	single	agriculteur	soussou	notaccess	notaccess	access	no	no	no	no	(5,12]	0			7.10607	High SEP	1	negative
month7	7261	2018	Male	2022-12-15	9.4	Layah	[22,35)	2	no_formal_education	married	unemployed	peulh	notaccess	notaccess	access	no	no	no	yes	[3,5]	0			0.516335	High SEP	4	negative
month7	7262	2020	Male	2022-12-15	13	Layah	[22,35)	2	no_formal_education	married	unemployed	peulh	notaccess	notaccess	access	no	no	no	yes	[3,5]	0			0.516459	High SEP	2	negative
month7	7263	2019	Male	2022-12-14	10.6	Kimara	[35,50)	2	primary	married	unemployed	autres	access	access	access	yes	yes	no	yes	[3,5]	0			-3.13507	Low SEP	3	negative
month7	7264	2021	Male	2022-12-14	14	Kimara	[35,50)	2	primary	married	unemployed	autres	access	access	access	yes	yes	no	yes	[3,5]	0			-3.13495	Low SEP	1	negative
month7	7279	2018	Female	2022-12-20	10.5	Sarata	[50,77]	1	no_formal_education	married	agriculteur	soussou	notaccess	notaccess	notaccess	yes	yes	no	yes	[3,5]	0			-1.57318	Middle SEP	4	negative
month7	7281	2018	Female	2022-12-20	12.1	Sarata	[35,50)	2	secondary	single	commerçant	soussou	notaccess	notaccess	notaccess	yes	yes	no	yes	(12,35]	0			-0.579929	Middle SEP	4	negative
month7	7282	2021	Female	2022-12-20	12.8	Sarata	[35,50)	2	secondary	single	commerçant	soussou	notaccess	notaccess	notaccess	yes	yes	no	yes	(12,35]	0			-0.579804	Middle SEP	1	negative
month7	7294	2018	Female	2022-12-20	10.3	Foulawa	[35,50)	1	no_formal_education	married	commerçant	peulh	notaccess	access	notaccess	no	no	no	no	(5,12]	0			7.11069	High SEP	4	negative
month7	7300	2018	Male	2022-12-20	12.7	Sarata	[50,77]	1	secondary	married	unemployed	soussou	access	access	access	yes	yes	no	no	(12,35]	0			-0.937562	Middle SEP	4	negative
month7	7307	2021	Female	2022-12-20	15.4	Sarata	[35,50)	1	secondary	married	unemployed	peulh	access	access	access	yes	yes	yes	yes	[3,5]	0			-1.1119	Middle SEP	1	negative
month7	7308	2021	Male	2022-12-20	12.3	Sarata	[35,50)	1	secondary	married	unemployed	peulh	access	access	access	yes	yes	yes	yes	[3,5]	0			-1.11178	Middle SEP	1	negative
month7	7321	2019	Female	2022-12-20	12	Sarata	[35,50)	1	secondary	married	unemployed	peulh	access	access	access	yes	yes	yes	yes	[3,5]	0			-1.11016	Middle SEP	3	negative
month7	7325	2019	Male	2022-12-22	13	Layah	[35,50)	2	no_formal_education	married	commerçant	soussou	notaccess	notaccess	notaccess	no	no	no	no	(5,12]	0			7.11455	High SEP	3	negative
month7	7333	2019	Male	2022-12-23	11.6	Kimara	[50,77]	1	secondary	married	unemployed	soussou	access	access	notaccess	yes	yes	no	yes	(12,35]	0			-2.47526	Low SEP	3	negative
month7	7342	2018	Male	2022-12-23	11.9	Hafia	[22,35)	2	primary	married	commerçant	soussou	access	access	notaccess	yes	yes	no	no	(5,12]	0			-2.44842	Low SEP	4	negative
month7	7346	2020	Male	2022-12-22	12.8	Layah	[35,50)	2	no_formal_education	married	commerçant	soussou	notaccess	notaccess	notaccess	yes	yes	no	yes	[3,5]	0			-0.666261	Middle SEP	2	negative
month7	7356	2021	Female	2022-12-23	13	Layah	[50,77]	2	secondary	married	unemployed	soussou	access	access	notaccess	yes	yes	no	no	(5,12]	0			-1.94947	Middle SEP	1	negative
month7	7360	2018	Male	2022-12-22	9.9	Layah	[22,35)	2	secondary	married	unemployed	soussou	notaccess	access	access	no	no	no	no	(5,12]	0			-3.2803	Low SEP	4	negative
month7	7362	2020	Female	2022-12-23	11.4	Hafia	[22,35)	2	secondary	married	unemployed	autres	notaccess	access	notaccess	no	no	no	no	[3,5]	0			-2.14861	Low SEP	2	negative
month7	7363	2021	Female	2022-12-23	14.6	Hafia	[22,35)	2	secondary	married	unemployed	autres	notaccess	access	notaccess	no	no	no	no	[3,5]	0			-2.14849	Low SEP	1	negative
month7	7365	2019	Female	2022-12-19	10.5	Maire_daouda	[22,35)	2	secondary	married	fonctionnaire	peulh	access	access	access	yes	no	yes	yes	(5,12]	0			-1.17785	Middle SEP	3	negative
month7	7366	2019	Male	2022-12-19	11.7	Maire_daouda	[22,35)	2	secondary	married	fonctionnaire	peulh	access	access	access	yes	no	yes	yes	(5,12]	0			-1.17773	Middle SEP	3	negative
month7	7367	2020	Male	2022-12-19	10.8	Maire_daouda	[22,35)	2	secondary	married	fonctionnaire	peulh	access	access	access	yes	no	yes	yes	(5,12]	0			-1.1776	Middle SEP	2	negative
month7	7369	2019	Female	2022-12-23	12	Hafia	[22,35)	2	secondary	married	unemployed	soussou	notaccess	access	access	no	no	no	yes	[3,5]	0			-3.18259	Low SEP	3	negative
month7	7370	2020	Female	2022-12-23	11.3	Hafia	[22,35)	2	secondary	married	unemployed	soussou	notaccess	access	access	no	no	no	yes	[3,5]	0			-3.18246	Low SEP	2	negative
month7	7377	2018	Male	2022-12-22	10.2	Layah	[22,35)	2	primary	single	unemployed	soussou	access	access	access	no	no	no	yes	[3,5]	0			0.349824	High SEP	4	negative
month7	7381	2019	Male	2022-12-27	15	Foulawa	[35,50)	1	no_formal_education	married	commerçant	peulh	notaccess	access	notaccess	no	no	no	no	(5,12]	0			7.12154	High SEP	3	negative
month7	7384	2021	Female	2022-12-23	13.8	Hafia	[50,77]	2	no_formal_education	single	commerçant	autres	notaccess	notaccess	notaccess	yes	yes	no	no	(5,12]	480	0	Pf	-0.716017	Middle SEP	1	positive
month7	7385	2019	Male	2022-12-23	10.9	Hafia	[50,77]	2	no_formal_education	single	commerçant	autres	notaccess	notaccess	notaccess	yes	yes	no	no	(5,12]	0			-0.715892	Middle SEP	3	negative
month7	7386	2020	Male	2022-12-23	11.3	Loumafori	[50,77]	1	no_formal_education	married	unemployed	peulh	notaccess	access	notaccess	yes	yes	no	no	(12,35]	0			-3.06589	Low SEP	2	negative
month8	7004	2020	Female	2023-01-05	13	Foulawa	[35,50)	1	secondary	married	commerçant	peulh	access	access	notaccess	yes	yes	no	yes	(5,12]	0			-1.44827	Middle SEP	3	negative
month8	7005	2020	Female	2023-01-05	12	Foulawa	[35,50)	1	secondary	married	commerçant	peulh	access	access	notaccess	yes	yes	no	yes	(5,12]	0			-1.44814	Middle SEP	3	negative
month8	7025	2020	Male	2023-01-05	10.5	Foulawa	[50,77]	1	no_formal_education	married	agriculteur	peulh	notaccess	notaccess	notaccess	no	no	no	no	(5,12]	0			7.07713	High SEP	3	negative
month8	7027	2021	Female	2023-01-05	12.7	Foulawa	[50,77]	1	no_formal_education	married	agriculteur	peulh	notaccess	notaccess	notaccess	no	no	no	no	(5,12]	0			7.07738	High SEP	2	negative
month8	7037	2021	Female	2023-01-05	12	Hafia	[22,35)	2	secondary	married	commerçant	peulh	notaccess	notaccess	access	yes	yes	no	yes	[3,5]	0			-2.24557	Low SEP	2	negative
month8	7038	2021	Male	2023-01-05	12.7	Hafia	[22,35)	2	secondary	married	commerçant	peulh	notaccess	notaccess	access	yes	yes	no	yes	[3,5]	0			-2.24545	Low SEP	2	negative
month8	7041	2020	Male	2023-01-06	12.8	Foulawa	[50,77]	1	secondary	married	fonctionnaire	peulh	access	access	access	no	no	no	no	(5,12]	160	0	Pf	-4.26917	Low SEP	3	positive
month8	7044	2020	Female	2023-01-09	9.6	Layah	[22,35)	2	secondary	single	unemployed	soussou	access	access	access	yes	yes	no	yes	(5,12]	0			0.873086	High SEP	3	negative
month8	7058	2019	Male	2023-01-11	10	Carrefour_Fodéyah	[35,50)	1	primary	married	unemployed	soussou	access	access	access	no	no	no	no	(5,12]	0			7.08125	High SEP	4	negative
month8	7079	2021	Female	2023-01-09	10.5	Sarata	[50,77]	2	no_formal_education	married	agriculteur	autres	access	access	access	yes	yes	no	yes	(12,35]	0			-0.376221	Middle SEP	2	negative
month8	7082	2019	Male	2023-01-11	12.1	Layah	[35,50)	2	no_formal_education	married	unemployed	soussou	access	access	notaccess	yes	yes	no	no	(5,12]	0			0.643152	High SEP	4	negative
month8	7083	2019	Male	2023-01-11	10.8	Layah	[35,50)	2	no_formal_education	married	unemployed	soussou	access	access	notaccess	yes	yes	no	no	(5,12]	0			0.643277	High SEP	4	negative
month8	7086	2020	Female	2023-01-11	10.8	Layah	[35,50)	2	no_formal_education	married	unemployed	soussou	access	access	notaccess	yes	yes	no	no	(5,12]	0			0.643651	High SEP	3	negative
month8	7090	2020	Female	2023-01-09	10.4	Olympio	[22,35)	2	secondary	single	unemployed	autres	notaccess	access	access	yes	yes	no	yes	(5,12]	0			-3.96978	Low SEP	3	negative
month8	7106	2020	Male	2023-01-09	10.7	Sarata	[22,35)	2	no_formal_education	married	unemployed	soussou	notaccess	notaccess	access	no	no	no	no	(5,12]	0			7.08723	High SEP	3	negative
month8	7123	2020	Female	2023-01-09	10.1	Tanene	[22,35)	2	no_formal_education	married	unemployed	soussou	notaccess	notaccess	access	yes	yes	no	no	[3,5]	0			-0.993585	Middle SEP	3	negative
month8	7150	2020	Male	2023-01-18	12.5	Loumafori	[50,77]	1	secondary	married	unemployed	autres	access	access	access	yes	yes	no	yes	(12,35]	0			-2.52137	Low SEP	3	negative
month8	7164	2020	Male	2023-01-18	15.3	Loumafori	[50,77]	1	secondary	married	unemployed	soussou	access	access	access	yes	yes	no	yes	(5,12]	0			-0.429652	Middle SEP	3	negative
month8	7176	2019	Female	2023-01-16	9.2	Carrefour_Fodéyah	[50,77]	1	secondary	married	fonctionnaire	peulh	access	notaccess	notaccess	yes	no	no	yes	(12,35]	0			-3.08029	Low SEP	4	negative
month8	7192	2020	Male	2023-01-16	12.3	Carrefour_Fodéyah	[35,50)	1	primary	married	unemployed	soussou	access	access	access	no	no	no	yes	(12,35]	0			-0.226339	Middle SEP	3	negative
month8	7226	2021	Female	2023-01-12	11.9	Olympio	[50,77]	1	secondary	married	agriculteur	soussou	access	access	notaccess	yes	yes	no	yes	(5,12]	0			-2.90353	Low SEP	2	negative
month8	7238	2020	Male	2023-01-16	10.1	Tanene	[22,35)	2	no_formal_education	married	commerçant	soussou	notaccess	access	notaccess	yes	yes	no	no	(12,35]	0			-2.11018	Middle SEP	3	negative
month8	7246	2020	Female	2023-01-12	14.8	Tanene	[22,35)	2	no_formal_education	married	unemployed	soussou	access	access	access	yes	yes	no	yes	(5,12]	0			0.0412568	High SEP	3	negative
month8	7253	2020	Female	2023-01-06	13	Olympio	[50,77]	1	secondary	married	agriculteur	soussou	access	access	notaccess	yes	yes	no	no	(12,35]	0			-0.912279	Middle SEP	3	negative
month8	7255	2019	Male	2023-01-05	10.4	Kimara	[50,77]	2	secondary	married	unemployed	soussou	access	access	access	yes	yes	no	yes	(5,12]	0			-3.66317	Low SEP	4	negative
month8	7256	2020	Female	2023-01-05	10.3	Kimara	[50,77]	2	secondary	married	unemployed	soussou	access	access	access	yes	yes	no	yes	(5,12]	0			-3.66304	Low SEP	3	negative
month8	7257	2021	Female	2023-01-06	14.3	Foulawa	[35,50)	1	no_formal_education	married	commerçant	peulh	notaccess	notaccess	notaccess	no	no	no	no	(5,12]	0			7.10607	High SEP	2	negative
month8	7262	2020	Male	2023-01-05	12	Layah	[22,35)	2	no_formal_education	married	unemployed	peulh	notaccess	notaccess	access	no	no	no	yes	[3,5]	0			0.516459	High SEP	3	negative
month8	7263	2019	Male	2023-01-06	13.1	Kimara	[35,50)	2	primary	married	unemployed	autres	access	access	access	yes	yes	no	yes	[3,5]	0			-3.13507	Low SEP	4	negative
month8	7264	2021	Male	2023-01-06	11.7	Kimara	[35,50)	2	primary	married	unemployed	autres	access	access	access	yes	yes	no	yes	[3,5]	0			-3.13495	Low SEP	2	negative
month8	7282	2021	Female	2023-01-16	11.8	Sarata	[35,50)	2	secondary	single	commerçant	soussou	notaccess	notaccess	notaccess	yes	yes	no	yes	(12,35]	0			-0.579804	Middle SEP	2	negative
month8	7307	2021	Female	2023-01-16	14.1	Sarata	[35,50)	1	secondary	married	unemployed	peulh	access	access	access	yes	yes	yes	yes	[3,5]	0			-1.1119	Middle SEP	2	negative
month8	7308	2021	Male	2023-01-16	12.6	Sarata	[35,50)	1	secondary	married	unemployed	peulh	access	access	access	yes	yes	yes	yes	[3,5]	0			-1.11178	Middle SEP	2	negative
month8	7321	2019	Female	2023-01-16	12.1	Sarata	[35,50)	1	secondary	married	unemployed	peulh	access	access	access	yes	yes	yes	yes	[3,5]	0			-1.11016	Middle SEP	4	negative
month8	7325	2019	Male	2023-01-10	9.16	Layah	[35,50)	2	no_formal_education	married	commerçant	soussou	notaccess	notaccess	notaccess	no	no	no	no	(5,12]	0			7.11455	High SEP	4	negative
month8	7333	2019	Male	2023-01-09	11.4	Kimara	[50,77]	1	secondary	married	unemployed	soussou	access	access	notaccess	yes	yes	no	yes	(12,35]	0			-2.47526	Low SEP	4	negative
month8	7346	2020	Male	2023-01-10	12	Layah	[35,50)	2	no_formal_education	married	commerçant	soussou	notaccess	notaccess	notaccess	yes	yes	no	yes	[3,5]	0			-0.666261	Middle SEP	3	negative
month8	7356	2021	Female	2023-01-12	11	Layah	[50,77]	2	secondary	married	unemployed	soussou	access	access	notaccess	yes	yes	no	no	(5,12]	0			-1.94947	Middle SEP	2	negative
month8	7362	2020	Female	2023-01-19	11	Hafia	[22,35)	2	secondary	married	unemployed	autres	notaccess	access	notaccess	no	no	no	no	[3,5]	0			-2.14861	Low SEP	3	negative
month8	7363	2021	Female	2023-01-19	11.6	Hafia	[22,35)	2	secondary	married	unemployed	autres	notaccess	access	notaccess	no	no	no	no	[3,5]	0			-2.14849	Low SEP	2	negative
month8	7364	2021	Male	2023-01-11	13.14	Maire_daouda	[22,35)	2	secondary	married	fonctionnaire	peulh	access	access	access	yes	no	yes	yes	(5,12]	0			-1.17798	Middle SEP	2	negative
month8	7365	2019	Female	2023-01-11	12	Maire_daouda	[22,35)	2	secondary	married	fonctionnaire	peulh	access	access	access	yes	no	yes	yes	(5,12]	0			-1.17785	Middle SEP	4	negative
month8	7366	2019	Male	2023-01-11	12.6	Maire_daouda	[22,35)	2	secondary	married	fonctionnaire	peulh	access	access	access	yes	no	yes	yes	(5,12]	0			-1.17773	Middle SEP	4	negative
month8	7367	2020	Male	2023-01-11	11.7	Maire_daouda	[22,35)	2	secondary	married	fonctionnaire	peulh	access	access	access	yes	no	yes	yes	(5,12]	0			-1.1776	Middle SEP	3	negative
month8	7369	2019	Female	2023-01-19	12.9	Hafia	[22,35)	2	secondary	married	unemployed	soussou	notaccess	access	access	no	no	no	yes	[3,5]	0			-3.18259	Low SEP	4	negative
month8	7370	2020	Female	2023-01-19	13.2	Hafia	[22,35)	2	secondary	married	unemployed	soussou	notaccess	access	access	no	no	no	yes	[3,5]	0			-3.18246	Low SEP	3	negative
month8	7381	2019	Male	2023-01-18	14.1	Olympio	[35,50)	1	primary	married	agriculteur	soussou	access	access	notaccess	no	no	no	no	(5,12]	0			7.12154	High SEP	4	negative
month8	7385	2019	Male	2023-01-18	12	Hafia	[50,77]	2	no_formal_education	single	commerçant	autres	notaccess	notaccess	notaccess	yes	yes	no	no	(5,12]	0			-0.715892	Middle SEP	4	negative
month8	7386	2020	Male	2023-01-18	11.8	Loumafori	[50,77]	1	no_formal_education	married	unemployed	peulh	notaccess	access	notaccess	yes	yes	no	no	(12,35]	0			-3.06589	Low SEP	3	negative
month9	7001	2020	Male	2023-02-13	15.3	Foulawa	[35,50)	1	secondary	married	fonctionnaire	peulh	notaccess	access	access	no	no	no	yes	(12,35]	0			-2.4773	Low SEP	3	negative
month9	7004	2020	Female	2023-02-13	13.7	Foulawa	[35,50)	1	secondary	married	commerçant	peulh	access	access	notaccess	yes	yes	no	yes	(5,12]	0			-1.44827	Middle SEP	3	negative
month9	7009	2019	Male	2023-02-14	11.5	Foulawa	[50,77]	1	secondary	married	unemployed	peulh	notaccess	access	access	yes	yes	no	yes	(5,12]	0			-3.45234	Low SEP	4	negative
month9	7016	2020	Male	2023-02-13	13.7	Foulawa	[50,77]	1	no_formal_education	married	unemployed	peulh	access	access	notaccess	no	no	no	yes	(5,12]	0			-0.419803	Middle SEP	3	negative
month9	7022	2021	Male	2023-02-13	14.3	Foulawa	[50,77]	1	no_formal_education	married	agriculteur	peulh	notaccess	notaccess	notaccess	no	no	no	no	(5,12]	0			7.07676	High SEP	2	negative
month9	7025	2020	Female	2023-02-13	10.3	Foulawa	[50,77]	1	no_formal_education	married	agriculteur	peulh	notaccess	notaccess	notaccess	no	no	no	no	(5,12]	0			7.07713	High SEP	3	negative
month9	7044	2020	Female	2023-02-23	10.1	Layah	[22,35)	2	secondary	single	unemployed	soussou	access	access	access	yes	yes	no	yes	(5,12]	0			0.873086	High SEP	3	negative
month9	7058	2019	Male	2023-02-23	10.6	Carrefour_Fodéyah	[35,50)	1	primary	married	unemployed	soussou	access	access	access	no	no	no	no	(5,12]	0			7.08125	High SEP	4	negative
month9	7079	2021	Female	2023-02-23	12	Sarata	[50,77]	2	no_formal_education	married	agriculteur	autres	access	access	access	yes	yes	no	yes	(12,35]	0			-0.376221	Middle SEP	2	negative
month9	7082	2019	Male	2023-02-23	11.5	Layah	[35,50)	2	no_formal_education	married	unemployed	soussou	access	access	notaccess	yes	yes	no	no	(5,12]	0			0.643152	High SEP	4	negative
month9	7083	2019	Male	2023-02-23	10.2	Layah	[35,50)	2	no_formal_education	married	unemployed	soussou	access	access	notaccess	yes	yes	no	no	(5,12]	0			0.643277	High SEP	4	negative
month9	7086	2020	Female	2023-02-24	10.6	Layah	[35,50)	2	no_formal_education	married	unemployed	soussou	access	access	notaccess	yes	yes	no	no	(5,12]	0			0.643651	High SEP	3	negative
month9	7090	2020	Female	2023-02-15	12.7	Olympio	[22,35)	2	secondary	single	unemployed	autres	notaccess	access	access	yes	yes	no	yes	(5,12]	0			-3.96978	Low SEP	3	negative
month9	7106	2020	Male	2023-02-15	14.2	Sarata	[22,35)	2	no_formal_education	married	unemployed	soussou	notaccess	notaccess	access	no	no	no	no	(5,12]	0			7.08723	High SEP	3	negative
month9	7123	2020	Female	2023-02-15	10.3	Tanene	[22,35)	2	no_formal_education	married	unemployed	soussou	notaccess	notaccess	access	yes	yes	no	no	[3,5]	0			-0.993585	Middle SEP	3	negative
month9	7150	2020	Male	2023-02-22	12.3	Loumafori	[50,77]	1	secondary	married	unemployed	autres	access	access	access	yes	yes	no	yes	(12,35]	0			-2.52137	Low SEP	3	negative
month9	7164	2020	Male	2023-02-22	12.8	Loumafori	[50,77]	1	secondary	married	unemployed	soussou	access	access	access	yes	yes	no	yes	(5,12]	0			-0.429652	Middle SEP	3	negative
month9	7176	2019	Female	2023-02-22	11.4	Carrefour_Fodéyah	[50,77]	1	secondary	married	fonctionnaire	peulh	access	notaccess	notaccess	yes	no	no	yes	(12,35]	0			-3.08029	Low SEP	4	negative
month9	7192	2020	Male	2023-02-22	12	Carrefour_Fodéyah	[35,50)	1	primary	married	unemployed	soussou	access	access	access	no	no	no	yes	(12,35]	0			-0.226339	Middle SEP	3	negative
month9	7226	2021	Female	2023-02-16	14.5	Olympio	[50,77]	1	secondary	married	agriculteur	soussou	access	access	notaccess	yes	yes	no	yes	(5,12]	0			-2.90353	Low SEP	2	negative
month9	7231	2020	Male	2023-02-17	10.8	Olympio	[50,77]	1	secondary	married	agriculteur	soussou	access	access	notaccess	yes	yes	no	yes	(5,12]	0			-2.9029	Low SEP	3	negative
month9	7246	2020	Female	2023-02-16	13.9	Tanene	[22,35)	2	no_formal_education	married	unemployed	soussou	access	access	access	yes	yes	no	yes	(5,12]	0			0.0412568	High SEP	3	negative
month9	7253	2020	Female	2023-02-13	9.5	Olympio	[50,77]	1	secondary	married	agriculteur	soussou	access	access	notaccess	yes	yes	no	no	(12,35]	0			-0.912279	Middle SEP	3	negative
month9	7255	2019	Male	2023-02-13	10.4	Kimara	[50,77]	2	secondary	married	unemployed	soussou	access	access	access	yes	yes	no	yes	(5,12]	0			-3.66317	Low SEP	4	negative
month9	7256	2020	Female	2023-02-13	10.9	Kimara	[50,77]	2	secondary	married	unemployed	soussou	access	access	access	yes	yes	no	yes	(5,12]	0			-3.66304	Low SEP	3	negative
month9	7257	2021	Female	2023-02-14	13.9	Carrefour_Fodéyah	[35,50)	1	primary	married	commerçant	soussou	notaccess	notaccess	notaccess	no	no	no	no	(5,12]	0			7.10607	High SEP	2	negative
month9	7262	2020	Male	2023-02-14	9.8	Layah	[22,35)	2	no_formal_education	married	unemployed	peulh	notaccess	notaccess	access	no	no	no	yes	[3,5]	500	0	Pf	0.516459	High SEP	3	positive
month9	7263	2019	Male	2023-02-13	13.4	Kimara	[35,50)	2	primary	married	unemployed	autres	access	access	access	yes	yes	no	yes	[3,5]	0			-3.13507	Low SEP	4	negative
month9	7264	2021	Male	2023-02-13	11.6	Kimara	[35,50)	2	primary	married	unemployed	autres	access	access	access	yes	yes	no	yes	[3,5]	0			-3.13495	Low SEP	2	negative
month9	7282	2021	Female	2023-02-20	11.3	Sarata	[35,50)	2	secondary	single	commerçant	soussou	notaccess	notaccess	notaccess	yes	yes	no	yes	(12,35]	0			-0.579804	Middle SEP	2	negative
month9	7307	2021	Female	2023-02-20	16.7	Sarata	[35,50)	1	secondary	married	unemployed	peulh	access	access	access	yes	yes	yes	yes	[3,5]	0			-1.1119	Middle SEP	2	negative
month9	7308	2021	Male	2023-02-20	12.4	Sarata	[35,50)	1	secondary	married	unemployed	peulh	access	access	access	yes	yes	yes	yes	[3,5]	0			-1.11178	Middle SEP	2	negative
month9	7321	2019	Female	2023-02-20	13	Sarata	[35,50)	1	secondary	married	unemployed	peulh	access	access	access	yes	yes	yes	yes	[3,5]	0			-1.11016	Middle SEP	4	negative
month9	7325	2019	Male	2023-02-24	11.4	Layah	[35,50)	2	no_formal_education	married	commerçant	soussou	notaccess	notaccess	notaccess	no	no	no	no	(5,12]	0			7.11455	High SEP	4	negative
month9	7333	2019	Male	2023-02-14	10.2	Kimara	[50,77]	1	secondary	married	unemployed	soussou	access	access	notaccess	yes	yes	no	yes	(12,35]	0			-2.47526	Low SEP	4	negative
month9	7346	2020	Male	2023-02-23	13	Layah	[35,50)	2	no_formal_education	married	commerçant	soussou	notaccess	notaccess	notaccess	yes	yes	no	yes	[3,5]	0			-0.666261	Middle SEP	3	negative
month9	7362	2020	Female	2023-02-24	11.2	Hafia	[22,35)	2	secondary	married	unemployed	autres	notaccess	access	notaccess	no	no	no	no	[3,5]	0			-2.14861	Low SEP	3	negative
month9	7363	2021	Female	2023-02-24	12.3	Hafia	[22,35)	2	secondary	married	unemployed	autres	notaccess	access	notaccess	no	no	no	no	[3,5]	0			-2.14849	Low SEP	2	negative
month9	7364	2021	Male	2023-02-16	13	Maire_daouda	[22,35)	2	secondary	married	fonctionnaire	peulh	access	access	access	yes	no	yes	yes	(5,12]	0			-1.17798	Middle SEP	2	negative
month9	7365	2019	Female	2023-02-16	12.5	Maire_daouda	[22,35)	2	secondary	married	fonctionnaire	peulh	access	access	access	yes	no	yes	yes	(5,12]	0			-1.17785	Middle SEP	4	negative
month9	7366	2019	Male	2023-02-16	12.8	Maire_daouda	[22,35)	2	secondary	married	fonctionnaire	peulh	access	access	access	yes	no	yes	yes	(5,12]	0			-1.17773	Middle SEP	4	negative
month9	7367	2020	Male	2023-02-16	11.3	Maire_daouda	[22,35)	2	secondary	married	fonctionnaire	peulh	access	access	access	yes	no	yes	yes	(5,12]	0			-1.1776	Middle SEP	3	negative
month9	7369	2019	Female	2023-02-27	12	Hafia	[22,35)	2	secondary	married	unemployed	soussou	notaccess	access	access	no	no	no	yes	[3,5]	0			-3.18259	Low SEP	4	negative
month9	7370	2020	Female	2023-02-27	11.9	Hafia	[22,35)	2	secondary	married	unemployed	soussou	notaccess	access	access	no	no	no	yes	[3,5]	0			-3.18246	Low SEP	3	negative
month9	7381	2019	Male	2023-02-22	14.5	Layah	[35,50)	2	no_formal_education	married	unemployed	soussou	notaccess	access	notaccess	no	no	no	no	(5,12]	0			7.12154	High SEP	4	negative
month9	7384	2021	Female	2023-02-27	12.5	Hafia	[50,77]	2	no_formal_education	single	commerçant	autres	notaccess	notaccess	notaccess	yes	yes	no	no	(5,12]	701	0	Pf	-0.716017	Middle SEP	2	positive
month9	7385	2019	Male	2023-02-27	11.4	Hafia	[50,77]	2	no_formal_education	single	commerçant	autres	notaccess	notaccess	notaccess	yes	yes	no	no	(5,12]	0			-0.715892	Middle SEP	4	negative
month9	7386	2020	Male	2023-02-27	10.7	Loumafori	[50,77]	1	no_formal_education	married	unemployed	peulh	notaccess	access	notaccess	yes	yes	no	no	(12,35]	0			-3.06589	Low SEP	3	negative
month1	7004	2016	Female	2022-03-07	14.4	Foulawa	[35,50)	1	secondary	married	commerçant	peulh	access	access	notaccess	yes	yes	no	yes	(5,12]	0			-1.44827	Middle SEP	6	negative
month1	7005	2015	Female	2022-03-07	12.4	Foulawa	[35,50)	1	secondary	married	commerçant	peulh	access	access	notaccess	yes	yes	no	yes	(5,12]	0			-1.44814	Middle SEP	7	negative
month1	7013	2014	Male	2022-03-07	12.8	Foulawa	[50,77]	1	no_formal_education	married	unemployed	peulh	access	access	notaccess	no	no	no	yes	(5,12]	0			-0.420177	Middle SEP	8	negative
month1	7015	2017	Male	2022-03-07	10.4	Foulawa	[50,77]	1	no_formal_education	married	unemployed	peulh	access	access	notaccess	no	no	no	yes	(5,12]	0			-0.419928	Middle SEP	5	negative
month1	7016	2013	Male	2022-03-07	16.9	Foulawa	[50,77]	1	no_formal_education	married	unemployed	peulh	access	access	notaccess	no	no	no	yes	(5,12]	0			-0.419803	Middle SEP	9	negative
month1	7019	2014	Male	2022-03-07	10.7	Foulawa	[35,50)	1	secondary	married	fonctionnaire	peulh	notaccess	access	access	yes	no	no	no	(5,12]	0			0.081847	High SEP	8	negative
month1	7021	2016	Female	2022-03-07	12.2	Carrefour_Fodéyah	[35,50)	2	secondary	married	unemployed	peulh	notaccess	access	access	no	no	no	no	(5,12]	0			7.07663	High SEP	6	negative
month1	7023	2013	Female	2022-03-07	17.7	Foulawa	[35,50)	1	secondary	married	fonctionnaire	peulh	notaccess	access	access	yes	no	no	no	(5,12]	0			0.0823459	High SEP	9	negative
month1	7024	2015	Female	2022-03-07	11.4	Foulawa	[50,77]	1	no_formal_education	married	agriculteur	peulh	notaccess	notaccess	notaccess	no	no	no	no	(5,12]	0			7.07701	High SEP	7	negative
month1	7041	2016	Female	2022-03-08	13.1	Foulawa	[50,77]	1	secondary	married	fonctionnaire	peulh	access	access	access	no	no	no	no	(5,12]	0			-4.26917	Low SEP	6	negative
month1	7043	2017	Female	2022-03-09	11.6	Layah	[22,35)	2	secondary	single	unemployed	soussou	access	access	access	yes	yes	no	yes	(5,12]	0			0.872961	High SEP	5	negative
month1	7045	2017	Female	2022-03-09	13	Layah	[22,35)	2	secondary	single	unemployed	soussou	access	access	access	yes	yes	no	yes	(5,12]	64	8	Pf + Gf	0.873211	High SEP	5	positive
month1	7050	2017	Male	2022-03-09	10.4	Layah	[50,77]	2	secondary	married	agriculteur	soussou	notaccess	access	notaccess	yes	yes	yes	yes	(12,35]	0			-1.22201	Middle SEP	5	negative
month1	7062	2013	Male	2022-03-09	10.2	Carrefour_Fodéyah	[35,50)	1	primary	married	unemployed	soussou	access	access	access	no	no	no	no	(5,12]	0			7.08175	High SEP	9	negative
month1	7066	2014	Female	2022-03-09	12.9	Layah	[35,50)	2	secondary	married	unemployed	soussou	access	access	access	no	no	no	yes	[3,5]	0			-2.08006	Middle SEP	8	negative
month1	7069	2016	Male	2022-03-09	9.5	Layah	[35,50)	2	no_formal_education	married	unemployed	soussou	notaccess	notaccess	notaccess	no	no	no	yes	(5,12]	1200	32	Pf + Gf	-2.01041	Middle SEP	6	positive
month1	7073	2016	Female	2022-03-09	10.7	Layah	[35,50)	2	secondary	married	fonctionnaire	soussou	access	access	notaccess	yes	yes	no	no	(5,12]	0			-1.49039	Middle SEP	6	negative
month1	7074	2017	Female	2022-03-09	11.7	Layah	[35,50)	2	secondary	married	fonctionnaire	soussou	access	access	notaccess	yes	yes	no	no	(5,12]	0			-1.49026	Middle SEP	5	negative
month1	7077	2013	Female	2022-03-09	10.5	Sarata	[50,77]	2	no_formal_education	married	agriculteur	autres	access	access	access	yes	yes	no	yes	(12,35]	0			-0.37647	Middle SEP	9	negative
month1	7078	2013	Female	2022-03-09	12.1	Sarata	[50,77]	2	no_formal_education	married	agriculteur	autres	access	access	access	yes	yes	no	yes	(12,35]	0			-0.376346	Middle SEP	9	negative
month1	7088	2015	Male	2022-03-10	11.9	Loumafori	[35,50)	2	secondary	married	unemployed	autres	notaccess	access	notaccess	yes	yes	no	no	[3,5]	0			-0.130506	High SEP	7	negative
month1	7089	2015	Male	2022-03-10	8.6	Loumafori	[35,50)	2	secondary	married	unemployed	autres	notaccess	access	notaccess	yes	yes	no	no	[3,5]	0			-0.130382	High SEP	7	negative
month1	7092	2015	Male	2022-03-10	13.1	Olympio	[22,35)	2	secondary	single	unemployed	autres	notaccess	access	access	yes	yes	no	yes	(5,12]	0			-3.96953	Low SEP	7	negative
month1	7099	2015	Female	2022-03-10	12.2	Olympio	[22,35)	2	primary	married	unemployed	autres	access	access	access	yes	yes	no	yes	(5,12]	0			-0.391181	Middle SEP	7	negative
month1	7100	2015	Female	2022-03-10	11.9	Tanene	[35,50)	2	no_formal_education	married	commerçant	soussou	notaccess	access	notaccess	no	no	no	no	(5,12]	0			7.08649	High SEP	7	negative
month1	7105	2017	Female	2022-03-10	12.8	Sarata	[22,35)	2	no_formal_education	married	unemployed	soussou	notaccess	notaccess	access	no	no	no	no	(5,12]	0			7.08711	High SEP	5	negative
month1	7109	2013	Male	2022-03-10	13.4	Olympio	[35,50)	2	secondary	married	commerçant	peulh	notaccess	access	notaccess	yes	yes	no	no	(5,12]	0			-1.12825	Middle SEP	9	negative
month1	7110	2017	Female	2022-03-10	10.9	Olympio	[35,50)	2	secondary	married	commerçant	peulh	notaccess	access	notaccess	yes	yes	no	no	(5,12]	0			-1.12813	Middle SEP	5	negative
month1	7111	2014	Male	2022-03-10	11.6	Olympio	[22,35)	2	primary	married	unemployed	peulh	notaccess	access	access	yes	yes	no	yes	[3,5]	0			-2.22748	Low SEP	8	negative
month1	7115	2016	Male	2022-03-10	14	Olympio	[35,50)	2	no_formal_education	married	commerçant	peulh	notaccess	notaccess	notaccess	yes	no	no	yes	(5,12]	0			-2.94611	Low SEP	6	negative
month1	7125	2014	Male	2022-03-14	12.9	Olympio	[50,77]	1	secondary	married	agriculteur	soussou	access	access	notaccess	yes	yes	no	no	(12,35]	0			-0.928246	Middle SEP	8	negative
month1	7126	2014	Male	2022-03-14	13.7	Olympio	[50,77]	1	secondary	married	agriculteur	soussou	access	access	notaccess	yes	yes	no	no	(12,35]	0			-0.928121	Middle SEP	8	negative
month1	7127	2014	Female	2022-03-14	12.9	Olympio	[50,77]	1	secondary	married	agriculteur	soussou	access	access	notaccess	yes	yes	no	no	(12,35]	0			-0.927997	Middle SEP	8	negative
month1	7129	2017	Male	2022-03-14	13.1	Loumafori	[50,77]	1	secondary	married	unemployed	soussou	notaccess	notaccess	notaccess	yes	yes	no	yes	(5,12]	0	48	Gf	0.330841	High SEP	5	negative
month1	7132	2017	Male	2022-03-14	12.5	Loumafori	[50,77]	1	secondary	married	unemployed	soussou	notaccess	notaccess	notaccess	yes	yes	no	yes	(5,12]	0			0.331216	High SEP	5	negative
month1	7137	2014	Male	2022-03-14	22	Hafia	[22,35)	2	secondary	married	unemployed	autres	notaccess	access	access	yes	yes	no	yes	(5,12]	0			-2.60437	Low SEP	8	negative
month1	7138	2015	Male	2022-03-14	11	Loumafori	[50,77]	1	no_formal_education	married	agriculteur	soussou	access	access	notaccess	yes	yes	no	yes	(5,12]	0			-2.92151	Low SEP	7	negative
month1	7142	2013	Male	2022-03-14	12.7	Loumafori	[50,77]	1	no_formal_education	married	agriculteur	soussou	access	access	notaccess	yes	yes	no	yes	(5,12]	0			-2.92101	Low SEP	9	negative
month1	7143	2015	Female	2022-03-14	10.4	Loumafori	[50,77]	1	no_formal_education	married	agriculteur	soussou	access	access	notaccess	yes	yes	no	yes	(5,12]	0			-2.92088	Low SEP	7	negative
month1	7144	2017	Male	2022-03-14	14.3	Loumafori	[50,77]	1	no_formal_education	married	unemployed	peulh	notaccess	access	notaccess	yes	no	no	yes	(5,12]	0			-0.880953	Middle SEP	5	negative
month1	7146	2015	Female	2022-03-14	13.1	Hafia	[22,35)	2	secondary	married	unemployed	autres	notaccess	access	access	yes	yes	no	yes	(5,12]	637	0	Pf	-2.60325	Low SEP	7	positive
month1	7149	2015	Female	2022-03-14	10.1	Loumafori	[50,77]	1	secondary	married	unemployed	autres	access	access	access	yes	yes	no	yes	(12,35]	0			-2.5215	Low SEP	7	negative
month1	7153	2016	Male	2022-03-14	13.2	Loumafori	[50,77]	1	secondary	married	unemployed	peulh	access	access	notaccess	yes	yes	no	yes	(12,35]	0			-3.47306	Low SEP	6	negative
month1	7163	2016	Female	2022-03-15	10.3	Hafia	[22,35)	2	secondary	married	fonctionnaire	peulh	notaccess	notaccess	notaccess	no	no	no	no	(5,12]	0			-1.86619	Middle SEP	6	negative
month1	7168	2016	Male	2022-03-15	13	Loumafori	[50,77]	1	secondary	married	unemployed	soussou	access	access	access	yes	yes	no	yes	(5,12]	160	0	Pf	-0.429153	Middle SEP	6	positive
month1	7171	2014	Male	2022-03-16	11.3	Carrefour_Fodéyah	[22,35)	1	secondary	married	unemployed	soussou	notaccess	access	access	no	no	no	no	(5,12]	0			7.09534	High SEP	8	negative
month1	7172	2017	Female	2022-03-16	9.8	Carrefour_Fodéyah	[22,35)	1	secondary	married	unemployed	soussou	notaccess	access	access	yes	yes	no	yes	(5,12]	0			-1.72674	Middle SEP	5	negative
month1	7173	2014	Male	2022-03-16	12.3	Carrefour_Fodéyah	[22,35)	1	secondary	married	unemployed	soussou	notaccess	access	access	yes	yes	no	yes	(5,12]	0			-1.72661	Middle SEP	8	negative
month1	7177	2017	Male	2022-03-16	12.9	Carrefour_Fodéyah	[50,77]	1	secondary	married	fonctionnaire	peulh	access	notaccess	notaccess	yes	no	no	yes	(12,35]	0			-3.08016	Low SEP	5	negative
month1	7183	2013	Male	2022-03-16	12.2	Carrefour_Fodéyah	[50,77]	2	secondary	single	unemployed	peulh	access	access	access	yes	yes	no	yes	(5,12]	0			-2.7801	Low SEP	9	negative
month1	7184	2016	Female	2022-03-16	12.3	Carrefour_Fodéyah	[50,77]	2	secondary	single	unemployed	peulh	access	access	access	yes	yes	no	yes	(5,12]	0			-2.77997	Low SEP	6	negative
month1	7188	2017	Male	2022-03-16	12.8	Carrefour_Fodéyah	[22,35)	1	secondary	married	unemployed	soussou	notaccess	access	access	no	no	no	no	(5,12]	0			7.09746	High SEP	5	negative
month1	7189	2017	Male	2022-03-16	11.4	Carrefour_Fodéyah	[50,77]	1	secondary	married	fonctionnaire	peulh	access	notaccess	notaccess	yes	yes	no	yes	(5,12]	0			-0.320337	Middle SEP	5	negative
month1	7191	2016	Female	2022-03-16	11	Carrefour_Fodéyah	[50,77]	1	secondary	married	fonctionnaire	peulh	access	notaccess	notaccess	yes	yes	no	yes	(5,12]	64	0	Pf	-0.320087	Middle SEP	6	positive
month1	7203	2015	Female	2022-03-17	10.7	Foulawa	[50,77]	1	secondary	married	fonctionnaire	peulh	access	access	notaccess	yes	yes	no	yes	[3,5]	0			-2.40805	Low SEP	7	negative
month1	7208	2016	Male	2022-03-17	9.9	Carrefour_Fodéyah	[50,77]	1	secondary	married	fonctionnaire	peulh	access	notaccess	notaccess	no	no	no	no	(5,12]	0			7.09996	High SEP	6	negative
month1	7211	2013	Female	2022-03-17	11.2	Tanene	[22,35)	2	primary	married	unemployed	soussou	access	access	notaccess	no	no	no	yes	[3,5]	0			-3.8275	Low SEP	9	negative
month1	7212	2017	Female	2022-03-17	11.5	Tanene	[22,35)	2	primary	married	unemployed	soussou	access	access	notaccess	no	no	no	yes	[3,5]	0			-3.82738	Low SEP	5	negative
month1	7213	2016	Male	2022-03-17	10.4	Olympio	[50,77]	1	secondary	married	agriculteur	soussou	access	access	notaccess	yes	yes	no	no	(12,35]	0			-1.31489	Middle SEP	6	negative
month1	7218	2015	Male	2022-03-17	12.8	Tanene	[35,50)	2	no_formal_education	married	commerçant	soussou	notaccess	access	notaccess	yes	yes	no	no	(5,12]	0			0.215399	High SEP	7	negative
month1	7221	2015	Female	2022-03-17	11.9	Tanene	[35,50)	2	no_formal_education	married	commerçant	soussou	notaccess	access	notaccess	yes	yes	no	no	(5,12]	0			0.215773	High SEP	7	negative
month1	7228	2013	Female	2022-03-17	11	Olympio	[50,77]	1	secondary	married	agriculteur	soussou	access	access	notaccess	yes	yes	no	yes	(5,12]	0			-2.90328	Low SEP	9	negative
month1	7229	2017	Female	2022-03-17	11.6	Olympio	[50,77]	1	secondary	married	agriculteur	soussou	access	access	notaccess	yes	yes	no	yes	(5,12]	0			-2.90315	Low SEP	5	negative
month1	7230	2017	Female	2022-03-17	9.7	Olympio	[50,77]	1	secondary	married	agriculteur	soussou	access	access	notaccess	yes	yes	no	yes	(5,12]	0			-2.90303	Low SEP	5	negative
month1	7233	2013	Male	2022-03-18	12.4	Sarata	[22,35)	2	primary	married	unemployed	soussou	access	access	notaccess	no	no	no	no	(5,12]	0			7.10308	High SEP	9	negative
month1	7237	2014	Female	2022-03-18	12.4	Tanene	[22,35)	2	no_formal_education	married	commerçant	soussou	notaccess	access	notaccess	yes	yes	no	no	(12,35]	0			-2.11031	Middle SEP	8	negative
month1	7242	2014	Female	2022-03-18	11.6	Sarata	[35,50)	1	no_formal_education	married	commerçant	soussou	notaccess	notaccess	notaccess	no	no	no	no	(5,12]	0			7.1042	High SEP	8	negative
month1	7248	2014	Male	2022-03-18	13.2	Tanene	[22,35)	2	no_formal_education	married	unemployed	soussou	access	access	access	yes	yes	no	yes	(5,12]	0			0.0415063	High SEP	8	negative
month1	7249	2017	Male	2022-03-18	11.6	Tanene	[22,35)	2	no_formal_education	married	unemployed	soussou	access	access	access	yes	yes	no	yes	(5,12]	0			0.041631	High SEP	5	negative
month1	7252	2014	Male	2022-03-18	8.8	Tanene	[22,35)	2	primary	married	unemployed	soussou	access	access	notaccess	no	no	no	yes	[3,5]	0			-1.81775	Middle SEP	8	negative
month1	7267	2014	Female	2022-03-21	11.5	Kimara	[35,50)	1	primary	married	unemployed	autres	notaccess	access	notaccess	yes	yes	no	yes	[3,5]	0			0.0284963	High SEP	8	negative
month1	7269	2016	Female	2022-03-21	13	Olympio	[22,35)	2	primary	married	unemployed	peulh	notaccess	access	access	yes	yes	no	yes	[3,5]	0			1.0307	High SEP	6	negative
month1	7270	2017	Female	2022-03-21	11.2	Olympio	[22,35)	2	primary	married	unemployed	peulh	notaccess	access	access	yes	yes	no	yes	[3,5]	0			1.03083	High SEP	5	negative
month1	7278	2015	Male	2022-03-22	11.1	Sarata	[50,77]	1	no_formal_education	married	agriculteur	soussou	notaccess	notaccess	notaccess	yes	yes	no	yes	[3,5]	0			-1.5733	Middle SEP	7	negative
month1	7285	2016	Female	2022-03-22	13	Sarata	[50,77]	1	secondary	married	agriculteur	soussou	access	access	notaccess	no	no	no	yes	(5,12]	0			-0.243571	Middle SEP	6	negative
month1	7286	2016	Female	2022-03-22	12.4	Sarata	[50,77]	1	secondary	married	agriculteur	soussou	access	access	notaccess	no	no	no	yes	(5,12]	0			-0.243446	Middle SEP	6	negative
month1	7287	2017	Male	2022-03-22	11.4	Sarata	[50,77]	1	secondary	married	agriculteur	soussou	access	access	notaccess	no	no	no	yes	(5,12]	0			-0.243321	Middle SEP	5	negative
month1	7293	2013	Male	2022-03-22	10.1	Layah	[35,50)	2	no_formal_education	married	unemployed	soussou	access	access	access	no	no	no	no	(5,12]	30090	0	Pf	7.11056	High SEP	9	positive
month1	7295	2013	Male	2022-03-22	11.2	Layah	[35,50)	2	no_formal_education	married	unemployed	soussou	notaccess	access	notaccess	no	no	no	no	(5,12]	0			7.11081	High SEP	9	negative
month1	7296	2017	Male	2022-03-22	12.3	Foulawa	[35,50)	1	no_formal_education	married	commerçant	peulh	notaccess	access	notaccess	no	no	no	no	(5,12]	0			7.11093	High SEP	5	negative
month1	7299	2013	Male	2022-03-22	10.5	Tanene	[22,35)	2	no_formal_education	married	commerçant	soussou	notaccess	access	notaccess	no	no	no	no	(5,12]	0			7.11131	High SEP	9	negative
month1	7301	2013	Male	2022-03-22	11.4	Sarata	[50,77]	1	secondary	married	unemployed	soussou	access	access	access	yes	yes	no	no	(12,35]	0			-0.937437	Middle SEP	9	negative
month1	7302	2017	Male	2022-03-22	13.6	Sarata	[50,77]	1	secondary	married	unemployed	soussou	access	access	access	yes	yes	no	no	(12,35]	0			-0.937312	Middle SEP	5	negative
month1	7305	2015	Male	2022-03-22	12.5	Foulawa	[35,50)	1	secondary	married	fonctionnaire	peulh	notaccess	access	access	no	no	no	no	(5,12]	0			7.11206	High SEP	7	negative
month1	7312	2013	Female	2022-03-22	12.6	Olympio	[22,35)	2	primary	married	unemployed	peulh	notaccess	access	access	no	no	no	no	(5,12]	0			7.11293	High SEP	9	negative
month1	7319	2013	Male	2022-03-23	14.8	Sarata	[35,50)	1	secondary	married	unemployed	peulh	access	access	access	yes	yes	yes	yes	[3,5]	0			-1.11041	Middle SEP	9	negative
month1	7320	2015	Male	2022-03-23	12.4	Sarata	[35,50)	1	secondary	married	unemployed	peulh	access	access	access	yes	yes	yes	yes	[3,5]	0			-1.11028	Middle SEP	7	negative
month1	7326	2014	Male	2022-03-23	10.7	Layah	[35,50)	2	no_formal_education	married	commerçant	soussou	notaccess	notaccess	notaccess	no	no	no	no	(5,12]	40100	0	Pf	7.11468	High SEP	8	positive
month1	7327	2013	Male	2022-03-23	13.6	Maire_daouda	[35,50)	1	secondary	married	fonctionnaire	soussou	access	notaccess	access	no	no	no	yes	[3,5]	0			-0.985579	Middle SEP	9	negative
month1	7329	2017	Male	2022-03-23	13.3	Maire_daouda	[35,50)	1	secondary	married	fonctionnaire	soussou	access	notaccess	access	no	no	no	no	(5,12]	0			0.193145	High SEP	5	negative
month1	7331	2015	Female	2022-03-23	12.6	Maire_daouda	[35,50)	1	secondary	married	fonctionnaire	soussou	access	notaccess	access	no	no	no	no	(5,12]	0			0.193394	High SEP	7	negative
month1	7332	2015	Female	2022-03-23	9.7	Maire_daouda	[35,50)	1	secondary	married	fonctionnaire	soussou	access	notaccess	access	no	no	no	no	(5,12]	0			0.193519	High SEP	7	negative
month1	7335	2017	Male	2022-03-23	14.2	Kimara	[50,77]	1	secondary	married	unemployed	soussou	access	access	notaccess	yes	yes	no	yes	(12,35]	0			-2.47501	Low SEP	5	negative
month1	7341	2013	Female	2022-03-24	7.8	Tanene	[35,50)	2	no_formal_education	married	commerçant	soussou	notaccess	access	notaccess	no	no	no	no	(5,12]	0			7.11655	High SEP	9	negative
month1	7345	2015	Male	2022-03-24	10.4	Layah	[35,50)	2	no_formal_education	married	commerçant	soussou	notaccess	notaccess	notaccess	yes	yes	no	yes	[3,5]	0			-0.666386	Middle SEP	7	negative
month1	7348	2016	Female	2022-03-24	13.2	Layah	[35,50)	2	no_formal_education	married	commerçant	soussou	notaccess	notaccess	notaccess	no	no	no	no	(5,12]	0			7.11742	High SEP	6	negative
month1	7351	2015	Male	2022-03-24	14.2	Layah	[22,35)	2	primary	married	unemployed	soussou	access	access	access	no	no	no	no	(5,12]	0			7.1178	High SEP	7	negative
month1	7354	2014	Female	2022-03-24	12.1	Layah	[50,77]	2	secondary	married	unemployed	soussou	access	access	notaccess	yes	yes	no	no	(5,12]	0			-1.94972	Middle SEP	8	negative
month1	7355	2016	Male	2022-03-24	8.3	Layah	[50,77]	2	secondary	married	unemployed	soussou	access	access	notaccess	yes	yes	no	no	(5,12]	454	0	Pf	-1.9496	Middle SEP	6	positive
month1	7373	2014	Male	2022-03-24	12.8	Hafia	[35,50)	2	no_formal_education	married	commerçant	peulh	access	access	access	no	no	no	no	(5,12]	0			-3.27197	Low SEP	8	negative
month1	7376	2014	Male	2022-03-24	13.1	Layah	[22,35)	2	primary	single	unemployed	soussou	access	access	access	no	no	no	yes	[3,5]	0			0.349699	High SEP	8	negative
month1	7379	2013	Male	2022-03-24	7.2	Layah	[22,35)	2	primary	single	unemployed	soussou	access	access	access	no	no	no	yes	[3,5]	0			0.350073	High SEP	9	negative
month1	7380	2016	Female	2022-03-25	13.6	Sarata	[35,50)	1	no_formal_education	married	commerçant	soussou	notaccess	notaccess	notaccess	no	no	no	no	(5,12]	0			7.12141	High SEP	6	negative
month1	7392	2014	Male	2022-03-25	11.1	Loumafori	[50,77]	1	no_formal_education	married	unemployed	peulh	notaccess	access	notaccess	yes	yes	no	no	(12,35]	0			-3.06514	Low SEP	8	negative
month1	7396	2013	Female	2022-03-25	12.7	Layah	[35,50)	2	no_formal_education	married	commerçant	soussou	notaccess	notaccess	notaccess	yes	yes	no	yes	(5,12]	0			-0.433147	Middle SEP	9	negative
month1	7397	2014	Female	2022-03-25	13.1	Layah	[35,50)	2	no_formal_education	married	commerçant	soussou	notaccess	notaccess	notaccess	yes	yes	no	yes	(5,12]	0			-0.433022	Middle SEP	8	negative
month1	7398	2016	Male	2022-03-25	11.6	Layah	[35,50)	2	no_formal_education	married	commerçant	soussou	notaccess	notaccess	notaccess	yes	yes	no	yes	(5,12]	0			-0.432898	Middle SEP	6	negative
month1	7399	2017	Female	2022-03-25	11.7	Layah	[35,50)	2	no_formal_education	married	commerçant	soussou	notaccess	notaccess	notaccess	yes	yes	no	yes	(5,12]	0			-0.432773	Middle SEP	5	negative
month1	7400	2014	Male	2022-03-25	11.3	Layah	[35,50)	2	no_formal_education	married	unemployed	soussou	access	access	notaccess	no	no	no	no	(5,12]	0			7.12391	High SEP	8	negative
month2	7016	2015	Female	2022-04-25	15.1	Foulawa	[50,77]	1	no_formal_education	married	unemployed	peulh	access	access	notaccess	no	no	no	yes	(5,12]	0			-0.419803	Middle SEP	7	negative
month2	7019	2017	Female	2022-04-26	11.4	Foulawa	[35,50)	1	secondary	married	fonctionnaire	peulh	notaccess	access	access	yes	no	no	no	(5,12]	0			0.081847	High SEP	5	negative
month2	7023	2017	Female	2022-04-26	16.5	Foulawa	[35,50)	1	secondary	married	fonctionnaire	peulh	notaccess	access	access	yes	no	no	no	(5,12]	0			0.0823459	High SEP	5	negative
month2	7026	2014	Female	2022-04-26	14.1	Foulawa	[50,77]	1	no_formal_education	married	agriculteur	peulh	notaccess	notaccess	notaccess	no	no	no	no	(5,12]	0			7.07725	High SEP	8	negative
month2	7035	2015	Female	2022-04-25	12.1	Foulawa	[22,35)	2	secondary	married	fonctionnaire	peulh	notaccess	access	access	yes	yes	no	no	[3,5]	0			-0.377009	Middle SEP	7	negative
month2	7036	2013	Female	2022-04-26	10.7	Hafia	[22,35)	2	secondary	married	commerçant	peulh	notaccess	notaccess	access	yes	yes	no	yes	[3,5]	0			-2.2457	Low SEP	9	negative
month2	7043	2014	Male	2022-04-27	11.9	Layah	[22,35)	2	secondary	single	unemployed	soussou	access	access	access	yes	yes	no	yes	(5,12]	0			0.872961	High SEP	8	negative
month2	7045	2017	Female	2022-04-27	12.1	Layah	[22,35)	2	secondary	single	unemployed	soussou	access	access	access	yes	yes	no	yes	(5,12]	0			0.873211	High SEP	5	negative
month2	7050	2017	Male	2022-04-29	10.6	Layah	[50,77]	2	secondary	married	agriculteur	soussou	notaccess	access	notaccess	yes	yes	yes	yes	(12,35]	1120	0	Pm	-1.22201	Middle SEP	5	positive
month2	7062	2013	Male	2022-04-29	11.3	Carrefour_Fodéyah	[35,50)	1	primary	married	unemployed	soussou	access	access	access	no	no	no	no	(5,12]	0			7.08175	High SEP	9	negative
month2	7066	2014	Female	2022-04-29	10.1	Layah	[35,50)	2	secondary	married	unemployed	soussou	access	access	access	no	no	no	yes	[3,5]	0			-2.08006	Middle SEP	8	negative
month2	7069	2016	Male	2022-04-29	7.1	Layah	[35,50)	2	no_formal_education	married	unemployed	soussou	notaccess	notaccess	notaccess	no	no	no	yes	(5,12]	5611	16	Pf + Gf	-2.01041	Middle SEP	6	positive
month2	7073	2016	Female	2022-04-27	7.2	Layah	[35,50)	2	secondary	married	fonctionnaire	soussou	access	access	notaccess	yes	yes	no	no	(5,12]	0			-1.49039	Middle SEP	6	negative
month2	7074	2017	Female	2022-04-27	11.5	Layah	[35,50)	2	secondary	married	fonctionnaire	soussou	access	access	notaccess	yes	yes	no	no	(5,12]	0			-1.49026	Middle SEP	5	negative
month2	7077	2013	Female	2022-04-27	11.7	Sarata	[50,77]	2	no_formal_education	married	agriculteur	autres	access	access	access	yes	yes	no	yes	(12,35]	0			-0.37647	Middle SEP	9	negative
month2	7078	2013	Female	2022-04-27	11.3	Sarata	[50,77]	2	no_formal_education	married	agriculteur	autres	access	access	access	yes	yes	no	yes	(12,35]	0			-0.376346	Middle SEP	9	negative
month2	7088	2015	Male	2022-05-04	11	Loumafori	[35,50)	2	secondary	married	unemployed	autres	notaccess	access	notaccess	yes	yes	no	no	[3,5]	0			-0.130506	High SEP	7	negative
month2	7089	2015	Male	2022-05-04	8.5	Loumafori	[35,50)	2	secondary	married	unemployed	autres	notaccess	access	notaccess	yes	yes	no	no	[3,5]	0			-0.130382	High SEP	7	negative
month2	7092	2015	Male	2022-05-04	9.3	Olympio	[22,35)	2	secondary	single	unemployed	autres	notaccess	access	access	yes	yes	no	yes	(5,12]	0			-3.96953	Low SEP	7	negative
month2	7099	2015	Female	2022-05-04	12.5	Olympio	[22,35)	2	primary	married	unemployed	autres	access	access	access	yes	yes	no	yes	(5,12]	0			-0.391181	Middle SEP	7	negative
month2	7100	2015	Female	2022-05-04	11.1	Tanene	[35,50)	2	no_formal_education	married	commerçant	soussou	notaccess	access	notaccess	no	no	no	no	(5,12]	0			7.08649	High SEP	7	negative
month2	7105	2017	Female	2022-05-04	11.6	Sarata	[22,35)	2	no_formal_education	married	unemployed	soussou	notaccess	notaccess	access	no	no	no	no	(5,12]	0			7.08711	High SEP	5	negative
month2	7109	2013	Male	2022-05-04	13	Olympio	[35,50)	2	secondary	married	commerçant	peulh	notaccess	access	notaccess	yes	yes	no	no	(5,12]	0			-1.12825	Middle SEP	9	negative
month2	7110	2017	Female	2022-05-04	11.5	Olympio	[35,50)	2	secondary	married	commerçant	peulh	notaccess	access	notaccess	yes	yes	no	no	(5,12]	0			-1.12813	Middle SEP	5	negative
month2	7111	2014	Male	2022-05-04	12.4	Olympio	[22,35)	2	primary	married	unemployed	peulh	notaccess	access	access	yes	yes	no	yes	[3,5]	0			-2.22748	Low SEP	8	negative
month2	7115	2016	Male	2022-05-04	12.1	Olympio	[35,50)	2	no_formal_education	married	commerçant	peulh	notaccess	notaccess	notaccess	yes	no	no	yes	(5,12]	0			-2.94611	Low SEP	6	negative
month2	7129	2017	Male	2022-05-06	13.5	Loumafori	[50,77]	1	secondary	married	unemployed	soussou	notaccess	notaccess	notaccess	yes	yes	no	yes	(5,12]	0			0.330841	High SEP	5	negative
month2	7132	2017	Male	2022-05-06	11.1	Loumafori	[50,77]	1	secondary	married	unemployed	soussou	notaccess	notaccess	notaccess	yes	yes	no	yes	(5,12]	0			0.331216	High SEP	5	negative
month2	7137	2014	Male	2022-05-16	22.2	Hafia	[22,35)	2	secondary	married	unemployed	autres	notaccess	access	access	yes	yes	no	yes	(5,12]	0			-2.60437	Low SEP	8	negative
month2	7138	2015	Male	2022-05-06	9.1	Loumafori	[50,77]	1	no_formal_education	married	agriculteur	soussou	access	access	notaccess	yes	yes	no	yes	(5,12]	48	0	Pf	-2.92151	Low SEP	7	positive
month2	7144	2017	Male	2022-05-16	9.1	Loumafori	[50,77]	1	no_formal_education	married	unemployed	peulh	notaccess	access	notaccess	yes	no	no	yes	(5,12]	0			-0.880953	Middle SEP	5	negative
month2	7146	2015	Female	2022-05-16	13.5	Hafia	[22,35)	2	secondary	married	unemployed	autres	notaccess	access	access	yes	yes	no	yes	(5,12]	0			-2.60325	Low SEP	7	negative
month2	7149	2015	Female	2022-05-06	11.52	Loumafori	[50,77]	1	secondary	married	unemployed	autres	access	access	access	yes	yes	no	yes	(12,35]	0			-2.5215	Low SEP	7	negative
month2	7153	2016	Male	2022-05-09	12.7	Loumafori	[50,77]	1	secondary	married	unemployed	peulh	access	access	notaccess	yes	yes	no	yes	(12,35]	0			-3.47306	Low SEP	6	negative
month2	7163	2016	Female	2022-05-17	9	Hafia	[22,35)	2	secondary	married	fonctionnaire	peulh	notaccess	notaccess	notaccess	no	no	no	no	(5,12]	0			-1.86619	Middle SEP	6	negative
month2	7168	2016	Male	2022-05-06	11.9	Loumafori	[50,77]	1	secondary	married	unemployed	soussou	access	access	access	yes	yes	no	yes	(5,12]	0			-0.429153	Middle SEP	6	negative
month2	7171	2014	Male	2022-05-11	10.3	Carrefour_Fodéyah	[22,35)	1	secondary	married	unemployed	soussou	notaccess	access	access	no	no	no	no	(5,12]	0			7.09534	High SEP	8	negative
month2	7172	2017	Female	2022-05-11	12.1	Carrefour_Fodéyah	[22,35)	1	secondary	married	unemployed	soussou	notaccess	access	access	yes	yes	no	yes	(5,12]	0			-1.72674	Middle SEP	5	negative
month2	7173	2014	Male	2022-05-11	12.5	Carrefour_Fodéyah	[22,35)	1	secondary	married	unemployed	soussou	notaccess	access	access	yes	yes	no	yes	(5,12]	0			-1.72661	Middle SEP	8	negative
month2	7177	2017	Male	2022-05-11	14.4	Carrefour_Fodéyah	[50,77]	1	secondary	married	fonctionnaire	peulh	access	notaccess	notaccess	yes	no	no	yes	(12,35]	0			-3.08016	Low SEP	5	negative
month2	7183	2013	Male	2022-05-11	12.3	Carrefour_Fodéyah	[50,77]	2	secondary	single	unemployed	peulh	access	access	access	yes	yes	no	yes	(5,12]	0			-2.7801	Low SEP	9	negative
month2	7184	2016	Female	2022-05-11	9.3	Carrefour_Fodéyah	[50,77]	2	secondary	single	unemployed	peulh	access	access	access	yes	yes	no	yes	(5,12]	0			-2.77997	Low SEP	6	negative
month2	7188	2017	Male	2022-05-12	12.5	Carrefour_Fodéyah	[22,35)	1	secondary	married	unemployed	soussou	notaccess	access	access	no	no	no	no	(5,12]	0			7.09746	High SEP	5	negative
month2	7189	2017	Male	2022-05-12	12.5	Carrefour_Fodéyah	[50,77]	1	secondary	married	fonctionnaire	peulh	access	notaccess	notaccess	yes	yes	no	yes	(5,12]	0			-0.320337	Middle SEP	5	negative
month2	7191	2016	Female	2022-05-12	11.8	Carrefour_Fodéyah	[50,77]	1	secondary	married	fonctionnaire	peulh	access	notaccess	notaccess	yes	yes	no	yes	(5,12]	0			-0.320087	Middle SEP	6	negative
month2	7203	2015	Female	2022-05-12	11	Foulawa	[50,77]	1	secondary	married	fonctionnaire	peulh	access	access	notaccess	yes	yes	no	yes	[3,5]	0			-2.40805	Low SEP	7	negative
month2	7208	2016	Male	2022-05-11	8.8	Carrefour_Fodéyah	[50,77]	1	secondary	married	fonctionnaire	peulh	access	notaccess	notaccess	no	no	no	no	(5,12]	0			7.09996	High SEP	6	negative
month2	7211	2013	Female	2022-05-18	11.1	Tanene	[22,35)	2	primary	married	unemployed	soussou	access	access	notaccess	no	no	no	yes	[3,5]	0			-3.8275	Low SEP	9	negative
month2	7213	2016	Male	2022-05-18	11.1	Olympio	[50,77]	1	secondary	married	agriculteur	soussou	access	access	notaccess	yes	yes	no	no	(12,35]	0			-1.31489	Middle SEP	6	negative
month2	7218	2015	Male	2022-05-18	12.1	Tanene	[35,50)	2	no_formal_education	married	commerçant	soussou	notaccess	access	notaccess	yes	yes	no	no	(5,12]	0			0.215399	High SEP	7	negative
month2	7221	2015	Female	2022-05-18	11.5	Tanene	[35,50)	2	no_formal_education	married	commerçant	soussou	notaccess	access	notaccess	yes	yes	no	no	(5,12]	0			0.215773	High SEP	7	negative
month2	7228	2013	Female	2022-05-18	10.5	Olympio	[50,77]	1	secondary	married	agriculteur	soussou	access	access	notaccess	yes	yes	no	yes	(5,12]	0			-2.90328	Low SEP	9	negative
month2	7230	2017	Female	2022-05-18	8.7	Olympio	[50,77]	1	secondary	married	agriculteur	soussou	access	access	notaccess	yes	yes	no	yes	(5,12]	0			-2.90303	Low SEP	5	negative
month2	7237	2014	Female	2022-05-18	12.1	Tanene	[22,35)	2	no_formal_education	married	commerçant	soussou	notaccess	access	notaccess	yes	yes	no	no	(12,35]	0			-2.11031	Middle SEP	8	negative
month2	7248	2014	Male	2022-05-18	12.1	Tanene	[22,35)	2	no_formal_education	married	unemployed	soussou	access	access	access	yes	yes	no	yes	(5,12]	0			0.0415063	High SEP	8	negative
month2	7249	2017	Male	2022-05-18	12.5	Tanene	[22,35)	2	no_formal_education	married	unemployed	soussou	access	access	access	yes	yes	no	yes	(5,12]	0			0.041631	High SEP	5	negative
month2	7252	2014	Male	2022-05-18	9.7	Tanene	[22,35)	2	primary	married	unemployed	soussou	access	access	notaccess	no	no	no	yes	[3,5]	0			-1.81775	Middle SEP	8	negative
month2	7267	2014	Female	2022-05-09	11.5	Kimara	[35,50)	1	primary	married	unemployed	autres	notaccess	access	notaccess	yes	yes	no	yes	[3,5]	0			0.0284963	High SEP	8	negative
month2	7270	2017	Female	2022-05-11	11.2	Olympio	[22,35)	2	primary	married	unemployed	peulh	notaccess	access	access	yes	yes	no	yes	[3,5]	0			1.03083	High SEP	5	negative
month2	7278	2015	Male	2022-05-13	11.4	Sarata	[50,77]	1	no_formal_education	married	agriculteur	soussou	notaccess	notaccess	notaccess	yes	yes	no	yes	[3,5]	0			-1.5733	Middle SEP	7	negative
month2	7293	2013	Male	2022-05-13	12.3	Layah	[35,50)	2	no_formal_education	married	unemployed	soussou	access	access	notaccess	no	no	no	no	(5,12]	0			7.11056	High SEP	9	negative
month2	7295	2013	Male	2022-05-13	11.8	Foulawa	[35,50)	1	no_formal_education	married	commerçant	peulh	notaccess	access	notaccess	no	no	no	no	(5,12]	0			7.11081	High SEP	9	negative
month2	7296	2017	Male	2022-05-13	13.2	Olympio	[35,50)	1	primary	married	agriculteur	soussou	access	access	notaccess	no	no	no	no	(5,12]	0			7.11093	High SEP	5	negative
month2	7299	2013	Male	2022-05-13	10.4	Tanene	[22,35)	2	no_formal_education	married	commerçant	soussou	notaccess	access	notaccess	no	no	no	no	(5,12]	0			7.11131	High SEP	9	negative
month2	7301	2013	Male	2022-05-13	14.4	Sarata	[50,77]	1	secondary	married	unemployed	soussou	access	access	access	yes	yes	no	no	(12,35]	0			-0.937437	Middle SEP	9	negative
month2	7302	2017	Male	2022-05-13	12.3	Sarata	[50,77]	1	secondary	married	unemployed	soussou	access	access	access	yes	yes	no	no	(12,35]	0			-0.937312	Middle SEP	5	negative
month2	7305	2015	Male	2022-05-16	13.6	Foulawa	[35,50)	1	secondary	married	fonctionnaire	peulh	notaccess	access	access	no	no	no	no	(5,12]	0			7.11206	High SEP	7	negative
month2	7312	2013	Female	2022-05-10	11.8	Olympio	[22,35)	2	primary	married	unemployed	peulh	notaccess	access	access	no	no	no	no	(5,12]	0			7.11293	High SEP	9	negative
month2	7319	2013	Male	2022-05-16	14.6	Sarata	[35,50)	1	secondary	married	unemployed	peulh	access	access	access	yes	yes	yes	yes	[3,5]	0			-1.11041	Middle SEP	9	negative
month2	7320	2015	Male	2022-05-13	12.6	Sarata	[35,50)	1	secondary	married	unemployed	peulh	access	access	access	yes	yes	yes	yes	[3,5]	0			-1.11028	Middle SEP	7	negative
month2	7329	2017	Male	2022-05-27	13.3	Maire_daouda	[35,50)	1	secondary	married	fonctionnaire	soussou	access	notaccess	access	no	no	no	no	(5,12]	0			0.193145	High SEP	5	negative
month2	7331	2015	Female	2022-05-27	11.3	Maire_daouda	[35,50)	1	secondary	married	fonctionnaire	soussou	access	notaccess	access	no	no	no	no	(5,12]	0			0.193394	High SEP	7	negative
month2	7332	2015	Female	2022-05-27	8.4	Maire_daouda	[35,50)	1	secondary	married	fonctionnaire	soussou	access	notaccess	access	no	no	no	no	(5,12]	0			0.193519	High SEP	7	negative
month2	7335	2017	Male	2022-05-10	10.6	Kimara	[50,77]	1	secondary	married	unemployed	soussou	access	access	notaccess	yes	yes	no	yes	(12,35]	0			-2.47501	Low SEP	5	negative
month2	7341	2013	Female	2022-05-16	7.5	Tanene	[35,50)	2	no_formal_education	married	commerçant	soussou	notaccess	access	notaccess	no	no	no	no	(5,12]	0			7.11655	High SEP	9	negative
month2	7345	2015	Male	2022-04-27	9	Layah	[35,50)	2	no_formal_education	married	commerçant	soussou	notaccess	notaccess	notaccess	yes	yes	no	yes	[3,5]	0			-0.666386	Middle SEP	7	negative
month2	7351	2015	Male	2022-04-29	14.6	Layah	[22,35)	2	primary	married	unemployed	soussou	access	access	access	no	no	no	no	(5,12]	0			7.1178	High SEP	7	negative
month2	7354	2014	Female	2022-04-27	11.4	Layah	[50,77]	2	secondary	married	unemployed	soussou	access	access	notaccess	yes	yes	no	no	(5,12]	0			-1.94972	Middle SEP	8	negative
month2	7355	2016	Male	2022-04-27	9.24	Layah	[50,77]	2	secondary	married	unemployed	soussou	access	access	notaccess	yes	yes	no	no	(5,12]	0			-1.9496	Middle SEP	6	negative
month2	7373	2014	Male	2022-05-18	12	Hafia	[35,50)	2	no_formal_education	married	commerçant	peulh	access	access	access	no	no	no	no	(5,12]	0			-3.27197	Low SEP	8	negative
month2	7376	2014	Male	2022-04-27	10.06	Layah	[22,35)	2	primary	single	unemployed	soussou	access	access	access	no	no	no	yes	[3,5]	0			0.349699	High SEP	8	negative
month2	7379	2013	Male	2022-04-27	10.04	Layah	[22,35)	2	primary	single	unemployed	soussou	access	access	access	no	no	no	yes	[3,5]	0			0.350073	High SEP	9	negative
month2	7380	2016	Female	2022-05-06	12.4	Sarata	[35,50)	1	no_formal_education	married	commerçant	soussou	notaccess	notaccess	notaccess	no	no	no	no	(5,12]	0			7.12141	High SEP	6	negative
month2	7392	2014	Male	2022-05-06	12.1	Loumafori	[50,77]	1	no_formal_education	married	unemployed	peulh	notaccess	access	notaccess	yes	yes	no	no	(12,35]	0			-3.06514	Low SEP	8	negative
month3	7003	2015	Female	2022-06-16	13.1	Carrefour_Fodéyah	[50,77]	1	secondary	married	fonctionnaire	peulh	access	notaccess	notaccess	yes	yes	no	yes	[3,5]	0			-3.62032	Low SEP	7	negative
month3	7005	2017	Male	2022-06-15	10.7	Foulawa	[35,50)	1	secondary	married	commerçant	peulh	access	access	notaccess	yes	yes	no	yes	(5,12]	0			-1.44814	Middle SEP	5	negative
month3	7008	2016	Male	2022-06-15	10.9	Foulawa	[50,77]	1	secondary	married	unemployed	peulh	notaccess	access	access	yes	yes	no	yes	(5,12]	0			-3.45246	Low SEP	6	negative
month3	7009	2013	Female	2022-06-15	14.8	Foulawa	[50,77]	1	secondary	married	unemployed	peulh	notaccess	access	access	yes	yes	no	yes	(5,12]	0			-3.45234	Low SEP	9	negative
month3	7016	2017	Male	2022-06-15	13.5	Foulawa	[50,77]	1	no_formal_education	married	unemployed	peulh	access	access	notaccess	no	no	no	yes	(5,12]	0			-0.419803	Middle SEP	5	negative
month3	7017	2016	Male	2022-06-16	13.2	Carrefour_Fodéyah	[50,77]	1	secondary	married	fonctionnaire	peulh	access	notaccess	notaccess	yes	yes	no	yes	[3,5]	0			-3.61857	Low SEP	6	negative
month3	7018	2016	Female	2022-06-16	14.5	Carrefour_Fodéyah	[50,77]	1	secondary	married	fonctionnaire	peulh	access	notaccess	notaccess	yes	yes	no	yes	[3,5]	0			-3.61844	Low SEP	6	negative
month3	7019	2014	Male	2022-06-15	11.6	Foulawa	[35,50)	1	secondary	married	fonctionnaire	peulh	notaccess	access	access	yes	no	no	no	(5,12]	0			0.081847	High SEP	8	negative
month3	7020	2013	Male	2022-06-15	12.3	Foulawa	[35,50)	1	secondary	married	fonctionnaire	peulh	notaccess	access	access	yes	no	no	no	(5,12]	0			0.0819717	High SEP	9	negative
month3	7022	2015	Female	2022-06-15	15.3	Foulawa	[50,77]	1	no_formal_education	married	agriculteur	peulh	notaccess	notaccess	notaccess	no	no	no	no	(5,12]	0			7.07676	High SEP	7	negative
month3	7023	2016	Male	2022-06-15	14.7	Foulawa	[35,50)	1	secondary	married	fonctionnaire	peulh	notaccess	access	access	yes	no	no	no	(5,12]	0			0.0823459	High SEP	6	negative
month3	7025	2013	Male	2022-06-15	11.55	Foulawa	[50,77]	1	no_formal_education	married	agriculteur	peulh	notaccess	notaccess	notaccess	no	no	no	no	(5,12]	0			7.07713	High SEP	9	negative
month3	7027	2014	Male	2022-06-15	14.2	Foulawa	[50,77]	1	no_formal_education	married	agriculteur	peulh	notaccess	notaccess	notaccess	no	no	no	no	(5,12]	0			7.07738	High SEP	8	negative
month3	7032	2015	Male	2022-06-15	15.3	Foulawa	[22,35)	2	secondary	married	fonctionnaire	peulh	notaccess	access	access	yes	yes	no	no	[3,5]	0			-0.377383	Middle SEP	7	negative
month3	7033	2017	Male	2022-06-15	11.2	Foulawa	[22,35)	2	secondary	married	fonctionnaire	peulh	notaccess	access	access	yes	yes	no	no	[3,5]	0			-0.377258	Middle SEP	5	negative
month3	7035	2015	Female	2022-06-15	12.3	Foulawa	[22,35)	2	secondary	married	fonctionnaire	peulh	notaccess	access	access	yes	yes	no	no	[3,5]	0			-0.377009	Middle SEP	7	negative
month3	7037	2015	Male	2022-06-16	12.5	Hafia	[22,35)	2	secondary	married	commerçant	peulh	notaccess	notaccess	access	yes	yes	no	yes	[3,5]	0			-2.24557	Low SEP	7	negative
month3	7040	2014	Male	2022-06-15	13.5	Foulawa	[50,77]	1	secondary	married	fonctionnaire	peulh	access	access	access	no	no	no	no	(5,12]	0			-4.26929	Low SEP	8	negative
month3	7045	2017	Female	2022-06-17	11.7	Layah	[22,35)	2	secondary	single	unemployed	soussou	access	access	access	yes	yes	no	yes	(5,12]	7844	0	Pf	0.873211	High SEP	5	positive
month3	7050	2017	Male	2022-06-20	9.12	Layah	[50,77]	2	secondary	married	agriculteur	soussou	notaccess	access	notaccess	yes	yes	yes	yes	(12,35]	0			-1.22201	Middle SEP	5	negative
month3	7062	2013	Male	2022-06-20	10.6	Carrefour_Fodéyah	[35,50)	1	primary	married	unemployed	soussou	access	access	access	no	no	no	no	(5,12]	0			7.08175	High SEP	9	negative
month3	7066	2014	Female	2022-06-17	11.4	Layah	[35,50)	2	secondary	married	unemployed	soussou	access	access	access	no	no	no	yes	[3,5]	0			-2.08006	Middle SEP	8	negative
month3	7069	2016	Male	2022-06-20	8.5	Layah	[35,50)	2	no_formal_education	married	unemployed	soussou	notaccess	notaccess	notaccess	no	no	no	yes	(5,12]	0			-2.01041	Middle SEP	6	negative
month3	7073	2016	Female	2022-06-20	10.6	Layah	[35,50)	2	secondary	married	fonctionnaire	soussou	access	access	notaccess	yes	yes	no	no	(5,12]	0			-1.49039	Middle SEP	6	negative
month3	7074	2017	Female	2022-06-20	11	Layah	[35,50)	2	secondary	married	fonctionnaire	soussou	access	access	notaccess	yes	yes	no	no	(5,12]	0			-1.49026	Middle SEP	5	negative
month3	7077	2013	Female	2022-06-17	12.6	Sarata	[50,77]	2	no_formal_education	married	agriculteur	autres	access	access	access	yes	yes	no	yes	(12,35]	46400	0	Pf	-0.37647	Middle SEP	9	positive
month3	7078	2013	Female	2022-06-17	11.9	Sarata	[50,77]	2	no_formal_education	married	agriculteur	autres	access	access	access	yes	yes	no	yes	(12,35]	1977	0	Pf	-0.376346	Middle SEP	9	positive
month3	7088	2015	Male	2022-06-30	12.7	Loumafori	[35,50)	2	secondary	married	unemployed	autres	notaccess	access	notaccess	yes	yes	no	no	[3,5]	0			-0.130506	High SEP	7	negative
month3	7089	2015	Male	2022-06-29	6.6	Loumafori	[35,50)	2	secondary	married	unemployed	autres	notaccess	access	notaccess	yes	yes	no	no	[3,5]	0			-0.130382	High SEP	7	negative
month3	7092	2015	Male	2022-06-30	13.4	Olympio	[22,35)	2	secondary	single	unemployed	autres	notaccess	access	access	yes	yes	no	yes	(5,12]	0			-3.96953	Low SEP	7	negative
month3	7099	2015	Female	2022-06-29	13.7	Olympio	[22,35)	2	primary	married	unemployed	autres	access	access	access	yes	yes	no	yes	(5,12]	0			-0.391181	Middle SEP	7	negative
month3	7100	2015	Female	2022-06-29	11.7	Tanene	[35,50)	2	no_formal_education	married	commerçant	soussou	notaccess	access	notaccess	no	no	no	no	(5,12]	0			7.08649	High SEP	7	negative
month3	7105	2017	Female	2022-06-29	11.1	Sarata	[22,35)	2	no_formal_education	married	unemployed	soussou	notaccess	notaccess	access	no	no	no	no	(5,12]	0			7.08711	High SEP	5	negative
month3	7109	2013	Male	2022-06-27	12.2	Olympio	[35,50)	2	secondary	married	commerçant	peulh	notaccess	access	notaccess	yes	yes	no	no	(5,12]	0			-1.12825	Middle SEP	9	negative
month3	7110	2017	Female	2022-06-29	12.1	Olympio	[35,50)	2	secondary	married	commerçant	peulh	notaccess	access	notaccess	yes	yes	no	no	(5,12]	0			-1.12813	Middle SEP	5	negative
month3	7111	2014	Male	2022-06-29	10.6	Olympio	[22,35)	2	primary	married	unemployed	peulh	notaccess	access	access	yes	yes	no	yes	[3,5]	0			-2.22748	Low SEP	8	negative
month3	7115	2016	Male	2022-06-30	12.7	Olympio	[35,50)	2	no_formal_education	married	commerçant	peulh	notaccess	notaccess	notaccess	yes	no	no	yes	(5,12]	0			-2.94611	Low SEP	6	negative
month3	7125	2014	Male	2022-07-04	12.4	Olympio	[50,77]	1	secondary	married	agriculteur	soussou	access	access	notaccess	yes	yes	no	no	(12,35]	0	22	Gf	-0.928246	Middle SEP	8	negative
month3	7126	2014	Male	2022-07-04	10.9	Olympio	[50,77]	1	secondary	married	agriculteur	soussou	access	access	notaccess	yes	yes	no	no	(12,35]	0			-0.928121	Middle SEP	8	negative
month3	7129	2017	Male	2022-06-21	14	Loumafori	[50,77]	1	secondary	married	unemployed	soussou	notaccess	notaccess	notaccess	yes	yes	no	yes	(5,12]	0			0.330841	High SEP	5	negative
month3	7132	2017	Male	2022-06-21	11.8	Loumafori	[50,77]	1	secondary	married	unemployed	soussou	notaccess	notaccess	notaccess	yes	yes	no	yes	(5,12]	0			0.331216	High SEP	5	negative
month3	7137	2014	Male	2022-06-27	22.9	Hafia	[22,35)	2	secondary	married	unemployed	autres	notaccess	access	access	yes	yes	no	yes	(5,12]	0			-2.60437	Low SEP	8	negative
month3	7138	2015	Male	2022-06-21	11.5	Loumafori	[50,77]	1	no_formal_education	married	agriculteur	soussou	access	access	notaccess	yes	yes	no	yes	(5,12]	0			-2.92151	Low SEP	7	negative
month3	7142	2013	Male	2022-07-04	11.4	Loumafori	[50,77]	1	no_formal_education	married	agriculteur	soussou	access	access	notaccess	yes	yes	no	yes	(5,12]	0			-2.92101	Low SEP	9	negative
month3	7143	2015	Female	2022-07-04	11.7	Loumafori	[50,77]	1	no_formal_education	married	agriculteur	soussou	access	access	notaccess	yes	yes	no	yes	(5,12]	0			-2.92088	Low SEP	7	negative
month3	7144	2017	Male	2022-06-24	10.4	Loumafori	[50,77]	1	no_formal_education	married	unemployed	peulh	notaccess	access	notaccess	yes	no	no	yes	(5,12]	0			-0.880953	Middle SEP	5	negative
month3	7146	2015	Female	2022-06-27	15	Hafia	[22,35)	2	secondary	married	unemployed	autres	notaccess	access	access	yes	yes	no	yes	(5,12]	0			-2.60325	Low SEP	7	negative
month3	7149	2015	Female	2022-06-21	11.4	Loumafori	[50,77]	1	secondary	married	unemployed	autres	access	access	access	yes	yes	no	yes	(12,35]	0			-2.5215	Low SEP	7	negative
month3	7153	2016	Male	2022-06-22	14	Loumafori	[50,77]	1	secondary	married	unemployed	peulh	access	access	notaccess	yes	yes	no	yes	(12,35]	0			-3.47306	Low SEP	6	negative
month3	7163	2016	Female	2022-06-13	10.7	Hafia	[22,35)	2	secondary	married	fonctionnaire	peulh	notaccess	notaccess	notaccess	no	no	no	no	(5,12]	0			-1.86619	Middle SEP	6	negative
month3	7168	2016	Male	2022-06-23	13.3	Loumafori	[50,77]	1	secondary	married	unemployed	soussou	access	access	access	yes	yes	no	yes	(5,12]	0			-0.429153	Middle SEP	6	negative
month3	7171	2014	Male	2022-06-23	11.9	Carrefour_Fodéyah	[22,35)	1	secondary	married	unemployed	soussou	notaccess	access	access	no	no	no	no	(5,12]	0			7.09534	High SEP	8	negative
month3	7172	2017	Female	2022-06-23	10.9	Carrefour_Fodéyah	[22,35)	1	secondary	married	unemployed	soussou	notaccess	access	access	yes	yes	no	yes	(5,12]	0			-1.72674	Middle SEP	5	negative
month3	7173	2014	Male	2022-06-23	13.4	Carrefour_Fodéyah	[22,35)	1	secondary	married	unemployed	soussou	notaccess	access	access	yes	yes	no	yes	(5,12]	0			-1.72661	Middle SEP	8	negative
month3	7183	2013	Male	2022-06-15	13.6	Carrefour_Fodéyah	[50,77]	2	secondary	single	unemployed	peulh	access	access	access	yes	yes	no	yes	(5,12]	0			-2.7801	Low SEP	9	negative
month3	7184	2016	Female	2022-06-15	11.4	Carrefour_Fodéyah	[50,77]	2	secondary	single	unemployed	peulh	access	access	access	yes	yes	no	yes	(5,12]	0			-2.77997	Low SEP	6	negative
month3	7188	2017	Male	2022-06-23	11.3	Carrefour_Fodéyah	[22,35)	1	secondary	married	unemployed	soussou	notaccess	access	access	no	no	no	no	(5,12]	0			7.09746	High SEP	5	negative
month3	7189	2017	Male	2022-06-24	12.2	Carrefour_Fodéyah	[50,77]	1	secondary	married	fonctionnaire	peulh	access	notaccess	notaccess	yes	yes	no	yes	(5,12]	0			-0.320337	Middle SEP	5	negative
month3	7191	2016	Female	2022-06-24	10.9	Carrefour_Fodéyah	[50,77]	1	secondary	married	fonctionnaire	peulh	access	notaccess	notaccess	yes	yes	no	yes	(5,12]	0			-0.320087	Middle SEP	6	negative
month3	7203	2015	Female	2022-06-27	11.9	Foulawa	[50,77]	1	secondary	married	fonctionnaire	peulh	access	access	notaccess	yes	yes	no	yes	[3,5]	0			-2.40805	Low SEP	7	negative
month3	7208	2016	Male	2022-06-23	12.2	Carrefour_Fodéyah	[50,77]	1	secondary	married	fonctionnaire	peulh	access	notaccess	notaccess	no	no	no	no	(5,12]	0			7.09996	High SEP	6	negative
month3	7211	2013	Female	2022-07-04	11.9	Tanene	[22,35)	2	primary	married	unemployed	soussou	access	access	notaccess	no	no	no	yes	[3,5]	0			-3.8275	Low SEP	9	negative
month3	7213	2016	Male	2022-07-04	12.3	Olympio	[50,77]	1	secondary	married	agriculteur	soussou	access	access	notaccess	yes	yes	no	no	(12,35]	0			-1.31489	Middle SEP	6	negative
month3	7218	2015	Male	2022-07-04	13	Tanene	[35,50)	2	no_formal_education	married	commerçant	soussou	notaccess	access	notaccess	yes	yes	no	no	(5,12]	0			0.215399	High SEP	7	negative
month3	7221	2015	Female	2022-07-04	12.6	Tanene	[35,50)	2	no_formal_education	married	commerçant	soussou	notaccess	access	notaccess	yes	yes	no	no	(5,12]	0			0.215773	High SEP	7	negative
month3	7228	2013	Female	2022-07-04	9.6	Olympio	[50,77]	1	secondary	married	agriculteur	soussou	access	access	notaccess	yes	yes	no	yes	(5,12]	0			-2.90328	Low SEP	9	negative
month3	7230	2017	Female	2022-07-04	11.3	Olympio	[50,77]	1	secondary	married	agriculteur	soussou	access	access	notaccess	yes	yes	no	yes	(5,12]	0			-2.90303	Low SEP	5	negative
month3	7237	2014	Female	2022-07-01	12.6	Tanene	[22,35)	2	no_formal_education	married	commerçant	soussou	notaccess	access	notaccess	yes	yes	no	no	(12,35]	0			-2.11031	Middle SEP	8	negative
month3	7242	2014	Female	2022-07-05	11	Sarata	[35,50)	1	no_formal_education	married	commerçant	soussou	notaccess	notaccess	notaccess	no	no	no	no	(5,12]	0			7.1042	High SEP	8	negative
month3	7248	2014	Male	2022-07-04	12.2	Tanene	[22,35)	2	no_formal_education	married	unemployed	soussou	access	access	access	yes	yes	no	yes	(5,12]	0			0.0415063	High SEP	8	negative
month3	7249	2017	Male	2022-07-04	11.1	Tanene	[22,35)	2	no_formal_education	married	unemployed	soussou	access	access	access	yes	yes	no	yes	(5,12]	0			0.041631	High SEP	5	negative
month3	7252	2014	Male	2022-07-04	9.1	Tanene	[22,35)	2	primary	married	unemployed	soussou	access	access	notaccess	no	no	no	yes	[3,5]	0			-1.81775	Middle SEP	8	negative
month3	7267	2014	Female	2022-06-29	10.2	Kimara	[35,50)	1	primary	married	unemployed	autres	notaccess	access	notaccess	yes	yes	no	yes	[3,5]	0			0.0284963	High SEP	8	negative
month3	7278	2015	Male	2022-06-27	11.5	Sarata	[50,77]	1	no_formal_education	married	agriculteur	soussou	notaccess	notaccess	notaccess	yes	yes	no	yes	[3,5]	0			-1.5733	Middle SEP	7	negative
month3	7293	2013	Male	2022-06-27	11.9	Maire_daouda	[35,50)	2	no_formal_education	married	commerçant	soussou	access	notaccess	access	no	no	no	no	(5,12]	0			7.11056	High SEP	9	negative
month3	7295	2013	Male	2022-06-27	12.9	Foulawa	[35,50)	1	no_formal_education	married	commerçant	peulh	notaccess	access	notaccess	no	no	no	no	(5,12]	0			7.11081	High SEP	9	negative
month3	7296	2017	Male	2022-06-27	13.3	Layah	[35,50)	2	no_formal_education	married	unemployed	soussou	notaccess	access	notaccess	no	no	no	no	(5,12]	0			7.11093	High SEP	5	negative
month3	7299	2013	Male	2022-06-27	9.6	Tanene	[22,35)	2	no_formal_education	married	commerçant	soussou	notaccess	access	notaccess	no	no	no	no	(5,12]	0			7.11131	High SEP	9	negative
month3	7305	2015	Male	2022-06-29	13.1	Foulawa	[35,50)	1	secondary	married	fonctionnaire	peulh	notaccess	access	access	no	no	no	no	(5,12]	0			7.11206	High SEP	7	negative
month3	7319	2013	Male	2022-06-27	14.6	Sarata	[35,50)	1	secondary	married	unemployed	peulh	access	access	access	yes	yes	yes	yes	[3,5]	0			-1.11041	Middle SEP	9	negative
month3	7320	2015	Male	2022-06-27	12	Sarata	[35,50)	1	secondary	married	unemployed	peulh	access	access	access	yes	yes	yes	yes	[3,5]	0			-1.11028	Middle SEP	7	negative
month3	7326	2014	Male	2022-06-20	12.1	Layah	[35,50)	2	no_formal_education	married	commerçant	soussou	notaccess	notaccess	notaccess	no	no	no	no	(5,12]	0			7.11468	High SEP	8	negative
month3	7329	2017	Male	2022-07-04	13.2	Maire_daouda	[35,50)	1	secondary	married	fonctionnaire	soussou	access	notaccess	access	no	no	no	no	(5,12]	0			0.193145	High SEP	5	negative
month3	7331	2015	Female	2022-07-04	12.14	Maire_daouda	[35,50)	1	secondary	married	fonctionnaire	soussou	access	notaccess	access	no	no	no	no	(5,12]	0			0.193394	High SEP	7	negative
month3	7332	2015	Female	2022-07-04	11	Maire_daouda	[35,50)	1	secondary	married	fonctionnaire	soussou	access	notaccess	access	no	no	no	no	(5,12]	0			0.193519	High SEP	7	negative
month3	7335	2017	Male	2022-06-30	9.7	Kimara	[50,77]	1	secondary	married	unemployed	soussou	access	access	notaccess	yes	yes	no	yes	(12,35]	0			-2.47501	Low SEP	5	negative
month3	7341	2013	Female	2022-06-27	8.4	Tanene	[35,50)	2	no_formal_education	married	commerçant	soussou	notaccess	access	notaccess	no	no	no	no	(5,12]	0			7.11655	High SEP	9	negative
month3	7345	2015	Male	2022-06-20	10.4	Layah	[35,50)	2	no_formal_education	married	commerçant	soussou	notaccess	notaccess	notaccess	yes	yes	no	yes	[3,5]	0			-0.666386	Middle SEP	7	negative
month3	7351	2015	Male	2022-06-24	16.3	Layah	[22,35)	2	primary	married	unemployed	soussou	access	access	access	no	no	no	no	(5,12]	0			7.1178	High SEP	7	negative
month3	7354	2014	Female	2022-06-20	11.2	Layah	[50,77]	2	secondary	married	unemployed	soussou	access	access	notaccess	yes	yes	no	no	(5,12]	6880	0	Pf	-1.94972	Middle SEP	8	positive
month3	7355	2016	Male	2022-06-20	10.07	Layah	[50,77]	2	secondary	married	unemployed	soussou	access	access	notaccess	yes	yes	no	no	(5,12]	0			-1.9496	Middle SEP	6	negative
month3	7373	2014	Male	2022-06-27	13.1	Hafia	[35,50)	2	no_formal_education	married	commerçant	peulh	access	access	access	no	no	no	no	(5,12]	0			-3.27197	Low SEP	8	negative
month3	7376	2014	Male	2022-06-20	12.2	Layah	[22,35)	2	primary	single	unemployed	soussou	access	access	access	no	no	no	yes	[3,5]	0			0.349699	High SEP	8	negative
month3	7379	2013	Male	2022-06-20	10.9	Layah	[22,35)	2	primary	single	unemployed	soussou	access	access	access	no	no	no	yes	[3,5]	0			0.350073	High SEP	9	negative
month3	7380	2016	Female	2022-06-23	13.7	Olympio	[35,50)	1	primary	married	agriculteur	soussou	access	access	notaccess	no	no	no	no	(5,12]	0			7.12141	High SEP	6	negative
month3	7392	2014	Male	2022-06-21	11.9	Loumafori	[50,77]	1	no_formal_education	married	unemployed	peulh	notaccess	access	notaccess	yes	yes	no	no	(12,35]	0			-3.06514	Low SEP	8	negative
month4	7002	2015	Male	2022-08-01	15.6	Carrefour_Fodéyah	[50,77]	1	secondary	married	fonctionnaire	peulh	access	notaccess	notaccess	yes	yes	no	yes	[3,5]	0			-3.62044	Low SEP	7	negative
month4	7003	2013	Male	2022-08-01	11.6	Carrefour_Fodéyah	[50,77]	1	secondary	married	fonctionnaire	peulh	access	notaccess	notaccess	yes	yes	no	yes	[3,5]	0			-3.62032	Low SEP	9	negative
month4	7006	2017	Male	2022-08-01	9.9	Foulawa	[35,50)	1	secondary	married	commerçant	peulh	access	access	notaccess	yes	yes	no	yes	(5,12]	0			-1.44802	Middle SEP	5	negative
month4	7009	2013	Female	2022-08-02	14.09	Foulawa	[50,77]	1	secondary	married	unemployed	peulh	notaccess	access	access	yes	yes	no	yes	(5,12]	0			-3.45234	Low SEP	9	negative
month4	7012	2017	Female	2022-08-02	11.7	Foulawa	[50,77]	1	secondary	married	unemployed	peulh	notaccess	access	access	yes	yes	no	yes	(5,12]	0			-3.45196	Low SEP	5	negative
month4	7020	2016	Female	2022-08-01	13.3	Foulawa	[35,50)	1	secondary	married	fonctionnaire	peulh	notaccess	access	access	yes	no	no	no	(5,12]	0			0.0819717	High SEP	6	negative
month4	7042	2014	Male	2022-08-03	13.3	Foulawa	[50,77]	1	secondary	married	fonctionnaire	peulh	access	access	access	no	no	no	no	(5,12]	0			-4.26904	Low SEP	8	negative
month4	7045	2017	Female	2022-08-12	10.9	Layah	[22,35)	2	secondary	single	unemployed	soussou	access	access	access	yes	yes	no	yes	(5,12]	0			0.873211	High SEP	5	negative
month4	7050	2017	Male	2022-08-12	10.9	Layah	[50,77]	2	secondary	married	agriculteur	soussou	notaccess	access	notaccess	yes	yes	yes	yes	(12,35]	0			-1.22201	Middle SEP	5	negative
month4	7062	2013	Male	2022-08-12	12.5	Carrefour_Fodéyah	[35,50)	1	primary	married	unemployed	soussou	access	access	access	no	no	no	no	(5,12]	0			7.08175	High SEP	9	negative
month4	7066	2014	Female	2022-08-11	11.9	Layah	[35,50)	2	secondary	married	unemployed	soussou	access	access	access	no	no	no	yes	[3,5]	0			-2.08006	Middle SEP	8	negative
month4	7069	2016	Male	2022-08-12	10.8	Layah	[35,50)	2	no_formal_education	married	unemployed	soussou	notaccess	notaccess	notaccess	no	no	no	yes	(5,12]	40000	0	Pf	-2.01041	Middle SEP	6	positive
month4	7073	2016	Female	2022-08-12	11	Layah	[35,50)	2	secondary	married	fonctionnaire	soussou	access	access	notaccess	yes	yes	no	no	(5,12]	0			-1.49039	Middle SEP	6	negative
month4	7074	2017	Female	2022-08-12	12.2	Layah	[35,50)	2	secondary	married	fonctionnaire	soussou	access	access	notaccess	yes	yes	no	no	(5,12]	0			-1.49026	Middle SEP	5	negative
month4	7077	2013	Female	2022-08-11	13.5	Sarata	[50,77]	2	no_formal_education	married	agriculteur	autres	access	access	access	yes	yes	no	yes	(12,35]	0			-0.37647	Middle SEP	9	negative
month4	7078	2013	Female	2022-08-11	11.5	Sarata	[50,77]	2	no_formal_education	married	agriculteur	autres	access	access	access	yes	yes	no	yes	(12,35]	0			-0.376346	Middle SEP	9	negative
month4	7088	2015	Male	2022-08-09	11.5	Loumafori	[35,50)	2	secondary	married	unemployed	autres	notaccess	access	notaccess	yes	yes	no	no	[3,5]	0			-0.130506	High SEP	7	negative
month4	7092	2015	Male	2022-08-03	12.8	Olympio	[22,35)	2	secondary	single	unemployed	autres	notaccess	access	access	yes	yes	no	yes	(5,12]	0			-3.96953	Low SEP	7	negative
month4	7099	2015	Female	2022-08-03	15.1	Olympio	[22,35)	2	primary	married	unemployed	autres	access	access	access	yes	yes	no	yes	(5,12]	0			-0.391181	Middle SEP	7	negative
month4	7100	2015	Female	2022-08-03	12.1	Tanene	[35,50)	2	no_formal_education	married	commerçant	soussou	notaccess	access	notaccess	no	no	no	no	(5,12]	0			7.08649	High SEP	7	negative
month4	7105	2017	Female	2022-08-03	12.4	Sarata	[22,35)	2	no_formal_education	married	unemployed	soussou	notaccess	notaccess	access	no	no	no	no	(5,12]	0			7.08711	High SEP	5	negative
month4	7109	2013	Male	2022-08-03	13.4	Olympio	[35,50)	2	secondary	married	commerçant	peulh	notaccess	access	notaccess	yes	yes	no	no	(5,12]	0			-1.12825	Middle SEP	9	negative
month4	7110	2017	Female	2022-08-03	11.1	Olympio	[35,50)	2	secondary	married	commerçant	peulh	notaccess	access	notaccess	yes	yes	no	no	(5,12]	0			-1.12813	Middle SEP	5	negative
month4	7111	2014	Male	2022-08-03	11.8	Olympio	[22,35)	2	primary	married	unemployed	peulh	notaccess	access	access	yes	yes	no	yes	[3,5]	0			-2.22748	Low SEP	8	negative
month4	7115	2016	Male	2022-08-03	12.8	Olympio	[35,50)	2	no_formal_education	married	commerçant	peulh	notaccess	notaccess	notaccess	yes	no	no	yes	(5,12]	0			-2.94611	Low SEP	6	negative
month4	7125	2014	Male	2022-08-03	11.4	Olympio	[50,77]	1	secondary	married	agriculteur	soussou	access	access	notaccess	yes	yes	no	no	(12,35]	0			-0.928246	Middle SEP	8	negative
month4	7126	2014	Male	2022-08-04	14.9	Olympio	[50,77]	1	secondary	married	agriculteur	soussou	access	access	notaccess	yes	yes	no	no	(12,35]	0			-0.928121	Middle SEP	8	negative
month4	7129	2017	Male	2022-08-16	12.6	Loumafori	[50,77]	1	secondary	married	unemployed	soussou	notaccess	notaccess	notaccess	yes	yes	no	yes	(5,12]	0			0.330841	High SEP	5	negative
month4	7132	2017	Male	2022-08-16	13.8	Loumafori	[50,77]	1	secondary	married	unemployed	soussou	notaccess	notaccess	notaccess	yes	yes	no	yes	(5,12]	0			0.331216	High SEP	5	negative
month4	7137	2014	Male	2022-08-17	22.7	Hafia	[22,35)	2	secondary	married	unemployed	autres	notaccess	access	access	yes	yes	no	yes	(5,12]	0			-2.60437	Low SEP	8	negative
month4	7138	2015	Male	2022-08-16	11.8	Loumafori	[50,77]	1	no_formal_education	married	agriculteur	soussou	access	access	notaccess	yes	yes	no	yes	(5,12]	0			-2.92151	Low SEP	7	negative
month4	7142	2013	Male	2022-08-16	11.7	Loumafori	[50,77]	1	no_formal_education	married	agriculteur	soussou	access	access	notaccess	yes	yes	no	yes	(5,12]	0			-2.92101	Low SEP	9	negative
month4	7143	2015	Female	2022-08-16	11.2	Loumafori	[50,77]	1	no_formal_education	married	agriculteur	soussou	access	access	notaccess	yes	yes	no	yes	(5,12]	0			-2.92088	Low SEP	7	negative
month4	7146	2015	Female	2022-08-17	14.4	Hafia	[22,35)	2	secondary	married	unemployed	autres	notaccess	access	access	yes	yes	no	yes	(5,12]	0			-2.60325	Low SEP	7	negative
month4	7149	2015	Female	2022-08-16	11.1	Loumafori	[50,77]	1	secondary	married	unemployed	autres	access	access	access	yes	yes	no	yes	(12,35]	0			-2.5215	Low SEP	7	negative
month4	7153	2016	Male	2022-08-16	13.1	Loumafori	[50,77]	1	secondary	married	unemployed	peulh	access	access	notaccess	yes	yes	no	yes	(12,35]	0			-3.47306	Low SEP	6	negative
month4	7163	2016	Female	2022-08-17	11.4	Hafia	[22,35)	2	secondary	married	fonctionnaire	peulh	notaccess	notaccess	notaccess	no	no	no	no	(5,12]	0			-1.86619	Middle SEP	6	negative
month4	7168	2016	Male	2022-08-16	13.7	Loumafori	[50,77]	1	secondary	married	unemployed	soussou	access	access	access	yes	yes	no	yes	(5,12]	0			-0.429153	Middle SEP	6	negative
month4	7171	2014	Male	2022-08-10	11.2	Carrefour_Fodéyah	[22,35)	1	secondary	married	unemployed	soussou	notaccess	access	access	no	no	no	no	(5,12]	0			7.09534	High SEP	8	negative
month4	7172	2017	Female	2022-08-10	11.3	Carrefour_Fodéyah	[22,35)	1	secondary	married	unemployed	soussou	notaccess	access	access	yes	yes	no	yes	(5,12]	0			-1.72674	Middle SEP	5	negative
month4	7173	2014	Male	2022-08-10	12.3	Carrefour_Fodéyah	[22,35)	1	secondary	married	unemployed	soussou	notaccess	access	access	yes	yes	no	yes	(5,12]	0			-1.72661	Middle SEP	8	negative
month4	7183	2013	Male	2022-08-10	12.8	Carrefour_Fodéyah	[50,77]	2	secondary	single	unemployed	peulh	access	access	access	yes	yes	no	yes	(5,12]	0			-2.7801	Low SEP	9	negative
month4	7188	2017	Male	2022-08-10	10.8	Carrefour_Fodéyah	[22,35)	1	secondary	married	unemployed	soussou	notaccess	access	access	no	no	no	no	(5,12]	0			7.09746	High SEP	5	negative
month4	7189	2017	Male	2022-08-10	12.9	Carrefour_Fodéyah	[50,77]	1	secondary	married	fonctionnaire	peulh	access	notaccess	notaccess	yes	yes	no	yes	(5,12]	0			-0.320337	Middle SEP	5	negative
month4	7191	2016	Female	2022-08-10	12.6	Carrefour_Fodéyah	[50,77]	1	secondary	married	fonctionnaire	peulh	access	notaccess	notaccess	yes	yes	no	yes	(5,12]	0			-0.320087	Middle SEP	6	negative
month4	7203	2015	Female	2022-08-10	10.9	Foulawa	[50,77]	1	secondary	married	fonctionnaire	peulh	access	access	notaccess	yes	yes	no	yes	[3,5]	0			-2.40805	Low SEP	7	negative
month4	7208	2016	Male	2022-08-05	11.7	Carrefour_Fodéyah	[50,77]	1	secondary	married	fonctionnaire	peulh	access	notaccess	notaccess	no	no	no	no	(5,12]	0			7.09996	High SEP	6	negative
month4	7211	2013	Female	2022-08-04	11.5	Tanene	[22,35)	2	primary	married	unemployed	soussou	access	access	notaccess	no	no	no	yes	[3,5]	0			-3.8275	Low SEP	9	negative
month4	7213	2016	Male	2022-08-04	13	Olympio	[50,77]	1	secondary	married	agriculteur	soussou	access	access	notaccess	yes	yes	no	no	(12,35]	0			-1.31489	Middle SEP	6	negative
month4	7218	2015	Male	2022-08-04	14.1	Tanene	[35,50)	2	no_formal_education	married	commerçant	soussou	notaccess	access	notaccess	yes	yes	no	no	(5,12]	0			0.215399	High SEP	7	negative
month4	7221	2015	Female	2022-08-04	12.4	Tanene	[35,50)	2	no_formal_education	married	commerçant	soussou	notaccess	access	notaccess	yes	yes	no	no	(5,12]	0			0.215773	High SEP	7	negative
month4	7228	2013	Female	2022-08-04	10.8	Olympio	[50,77]	1	secondary	married	agriculteur	soussou	access	access	notaccess	yes	yes	no	yes	(5,12]	0			-2.90328	Low SEP	9	negative
month4	7230	2017	Female	2022-08-05	12	Olympio	[50,77]	1	secondary	married	agriculteur	soussou	access	access	notaccess	yes	yes	no	yes	(5,12]	0			-2.90303	Low SEP	5	negative
month4	7237	2014	Female	2022-08-05	8.4	Tanene	[22,35)	2	no_formal_education	married	commerçant	soussou	notaccess	access	notaccess	yes	yes	no	no	(12,35]	0			-2.11031	Middle SEP	8	negative
month4	7242	2014	Female	2022-08-19	12	Tanene	[35,50)	2	no_formal_education	married	commerçant	soussou	notaccess	access	notaccess	no	no	no	no	(5,12]	0			7.1042	High SEP	8	negative
month4	7248	2014	Male	2022-08-04	12.9	Tanene	[22,35)	2	no_formal_education	married	unemployed	soussou	access	access	access	yes	yes	no	yes	(5,12]	0			0.0415063	High SEP	8	negative
month4	7249	2017	Male	2022-08-04	12.4	Tanene	[22,35)	2	no_formal_education	married	unemployed	soussou	access	access	access	yes	yes	no	yes	(5,12]	0			0.041631	High SEP	5	negative
month4	7252	2014	Male	2022-08-04	9.6	Tanene	[22,35)	2	primary	married	unemployed	soussou	access	access	notaccess	no	no	no	yes	[3,5]	0			-1.81775	Middle SEP	8	negative
month4	7267	2014	Female	2022-08-01	12.1	Kimara	[35,50)	1	primary	married	unemployed	autres	notaccess	access	notaccess	yes	yes	no	yes	[3,5]	0			0.0284963	High SEP	8	negative
month4	7270	2017	Female	2022-08-01	11.7	Olympio	[22,35)	2	primary	married	unemployed	peulh	notaccess	access	access	yes	yes	no	yes	[3,5]	0			1.03083	High SEP	5	negative
month4	7278	2015	Male	2022-08-09	14.1	Sarata	[50,77]	1	no_formal_education	married	agriculteur	soussou	notaccess	notaccess	notaccess	yes	yes	no	yes	[3,5]	0			-1.5733	Middle SEP	7	negative
month4	7293	2013	Male	2022-08-09	10.8	Layah	[35,50)	2	no_formal_education	married	commerçant	soussou	notaccess	notaccess	notaccess	no	no	no	no	(5,12]	627	0	Po	7.11056	High SEP	9	positive
month4	7295	2013	Male	2022-08-05	8.2	Layah	[35,50)	2	no_formal_education	married	commerçant	soussou	notaccess	notaccess	notaccess	no	no	no	no	(5,12]	0			7.11081	High SEP	9	negative
month4	7296	2017	Male	2022-08-05	13.5	Foulawa	[35,50)	1	no_formal_education	married	commerçant	peulh	notaccess	access	notaccess	no	no	no	no	(5,12]	0			7.11093	High SEP	5	negative
month4	7299	2013	Male	2022-08-05	9.6	Tanene	[22,35)	2	no_formal_education	married	commerçant	soussou	notaccess	access	notaccess	no	no	no	no	(5,12]	0			7.11131	High SEP	9	negative
month4	7301	2013	Male	2022-08-09	15.8	Sarata	[50,77]	1	secondary	married	unemployed	soussou	access	access	access	yes	yes	no	no	(12,35]	0			-0.937437	Middle SEP	9	negative
month4	7312	2013	Female	2022-08-03	11.2	Olympio	[22,35)	2	primary	married	unemployed	peulh	notaccess	access	access	no	no	no	no	(5,12]	0			7.11293	High SEP	9	negative
month4	7319	2013	Male	2022-08-04	15.7	Sarata	[35,50)	1	secondary	married	unemployed	peulh	access	access	access	yes	yes	yes	yes	[3,5]	0			-1.11041	Middle SEP	9	negative
month4	7320	2015	Male	2022-08-04	12.6	Sarata	[35,50)	1	secondary	married	unemployed	peulh	access	access	access	yes	yes	yes	yes	[3,5]	0			-1.11028	Middle SEP	7	negative
month4	7326	2014	Male	2022-08-12	8.6	Layah	[35,50)	2	no_formal_education	married	commerçant	soussou	notaccess	notaccess	notaccess	no	no	no	no	(5,12]	0	12	Gf	7.11468	High SEP	8	negative
month4	7329	2017	Male	2022-08-08	13.2	Maire_daouda	[35,50)	1	secondary	married	fonctionnaire	soussou	access	notaccess	access	no	no	no	no	(5,12]	0			0.193145	High SEP	5	negative
month4	7331	2015	Female	2022-08-08	13.4	Maire_daouda	[35,50)	1	secondary	married	fonctionnaire	soussou	access	notaccess	access	no	no	no	no	(5,12]	0			0.193394	High SEP	7	negative
month4	7332	2015	Female	2022-08-08	9.12	Maire_daouda	[35,50)	1	secondary	married	fonctionnaire	soussou	access	notaccess	access	no	no	no	no	(5,12]	0			0.193519	High SEP	7	negative
month4	7335	2017	Male	2022-08-01	11.6	Kimara	[50,77]	1	secondary	married	unemployed	soussou	access	access	notaccess	yes	yes	no	yes	(12,35]	0			-2.47501	Low SEP	5	negative
month4	7341	2013	Female	2022-08-17	7.7	Tanene	[35,50)	2	no_formal_education	married	commerçant	soussou	notaccess	access	notaccess	no	no	no	no	(5,12]	0			7.11655	High SEP	9	negative
month4	7345	2015	Male	2022-08-11	10.8	Layah	[35,50)	2	no_formal_education	married	commerçant	soussou	notaccess	notaccess	notaccess	yes	yes	no	yes	[3,5]	0			-0.666386	Middle SEP	7	negative
month4	7348	2016	Female	2022-08-11	12.7	Layah	[35,50)	2	no_formal_education	married	commerçant	soussou	notaccess	notaccess	notaccess	no	no	no	no	(5,12]	0			7.11742	High SEP	6	negative
month4	7351	2015	Male	2022-08-17	13.2	Layah	[22,35)	2	primary	married	unemployed	soussou	access	access	access	no	no	no	no	(5,12]	0			7.1178	High SEP	7	negative
month4	7354	2014	Female	2022-08-11	10.4	Layah	[50,77]	2	secondary	married	unemployed	soussou	access	access	notaccess	yes	yes	no	no	(5,12]	0			-1.94972	Middle SEP	8	negative
month4	7355	2016	Male	2022-08-11	10.1	Layah	[50,77]	2	secondary	married	unemployed	soussou	access	access	notaccess	yes	yes	no	no	(5,12]	371	0	Pf	-1.9496	Middle SEP	6	positive
month4	7373	2014	Male	2022-08-17	13.2	Hafia	[35,50)	2	no_formal_education	married	commerçant	peulh	access	access	access	no	no	no	no	(5,12]	0			-3.27197	Low SEP	8	negative
month4	7376	2014	Male	2022-08-16	11.5	Layah	[22,35)	2	primary	single	unemployed	soussou	access	access	access	no	no	no	yes	[3,5]	0			0.349699	High SEP	8	negative
month4	7379	2013	Male	2022-08-11	11.3	Layah	[22,35)	2	primary	single	unemployed	soussou	access	access	access	no	no	no	yes	[3,5]	0			0.350073	High SEP	9	negative
month4	7380	2016	Female	2022-08-16	12.3	Foulawa	[35,50)	1	no_formal_education	married	commerçant	peulh	notaccess	access	notaccess	no	no	no	no	(5,12]	0			7.12141	High SEP	6	negative
month4	7392	2014	Male	2022-08-18	11.9	Loumafori	[50,77]	1	no_formal_education	married	unemployed	peulh	notaccess	access	notaccess	yes	yes	no	no	(12,35]	0			-3.06514	Low SEP	8	negative
month5	7010	2015	Male	2022-09-05	13.3	Foulawa	[50,77]	1	secondary	married	unemployed	peulh	notaccess	access	access	yes	yes	no	yes	(5,12]	0			-3.45221	Low SEP	7	negative
month5	7013	2016	Male	2022-09-05	10.3	Foulawa	[50,77]	1	no_formal_education	married	unemployed	peulh	access	access	notaccess	no	no	no	yes	(5,12]	0			-0.420177	Middle SEP	6	negative
month5	7014	2014	Male	2022-09-05	11.1	Foulawa	[50,77]	1	no_formal_education	married	unemployed	peulh	access	access	notaccess	no	no	no	yes	(5,12]	160	0	Pf	-0.420052	Middle SEP	8	positive
month5	7016	2015	Female	2022-09-05	14	Foulawa	[50,77]	1	no_formal_education	married	unemployed	peulh	access	access	notaccess	no	no	no	yes	(5,12]	0			-0.419803	Middle SEP	7	negative
month5	7045	2017	Female	2022-09-12	11.8	Layah	[22,35)	2	secondary	single	unemployed	soussou	access	access	access	yes	yes	no	yes	(5,12]	0			0.873211	High SEP	5	negative
month5	7050	2017	Male	2022-09-19	11	Layah	[50,77]	2	secondary	married	agriculteur	soussou	notaccess	access	notaccess	yes	yes	yes	yes	(12,35]	0			-1.22201	Middle SEP	5	negative
month5	7062	2013	Male	2022-09-19	11.7	Carrefour_Fodéyah	[35,50)	1	primary	married	unemployed	soussou	access	access	access	no	no	no	no	(5,12]	0			7.08175	High SEP	9	negative
month5	7066	2014	Female	2022-09-12	11.8	Layah	[35,50)	2	secondary	married	unemployed	soussou	access	access	access	no	no	no	yes	[3,5]	0			-2.08006	Middle SEP	8	negative
month5	7069	2016	Male	2022-09-12	11.9	Layah	[35,50)	2	no_formal_education	married	unemployed	soussou	notaccess	notaccess	notaccess	no	no	no	yes	(5,12]	8200	0	Pf	-2.01041	Middle SEP	6	positive
month5	7073	2016	Female	2022-09-12	10.9	Layah	[35,50)	2	secondary	married	fonctionnaire	soussou	access	access	notaccess	yes	yes	no	no	(5,12]	0			-1.49039	Middle SEP	6	negative
month5	7074	2017	Female	2022-09-12	11.9	Layah	[35,50)	2	secondary	married	fonctionnaire	soussou	access	access	notaccess	yes	yes	no	no	(5,12]	0			-1.49026	Middle SEP	5	negative
month5	7077	2013	Female	2022-09-12	13	Sarata	[50,77]	2	no_formal_education	married	agriculteur	autres	access	access	access	yes	yes	no	yes	(12,35]	0			-0.37647	Middle SEP	9	negative
month5	7078	2013	Female	2022-09-12	11.7	Sarata	[50,77]	2	no_formal_education	married	agriculteur	autres	access	access	access	yes	yes	no	yes	(12,35]	0			-0.376346	Middle SEP	9	negative
month5	7092	2015	Male	2022-09-07	13.1	Olympio	[22,35)	2	secondary	single	unemployed	autres	notaccess	access	access	yes	yes	no	yes	(5,12]	0			-3.96953	Low SEP	7	negative
month5	7099	2015	Female	2022-09-07	13.5	Olympio	[22,35)	2	primary	married	unemployed	autres	access	access	access	yes	yes	no	yes	(5,12]	0			-0.391181	Middle SEP	7	negative
month5	7100	2015	Female	2022-09-07	11.8	Tanene	[35,50)	2	no_formal_education	married	commerçant	soussou	notaccess	access	notaccess	no	no	no	no	(5,12]	0			7.08649	High SEP	7	negative
month5	7105	2017	Female	2022-09-07	11.9	Sarata	[22,35)	2	no_formal_education	married	unemployed	soussou	notaccess	notaccess	access	no	no	no	no	(5,12]	0			7.08711	High SEP	5	negative
month5	7109	2013	Male	2022-09-07	12.2	Olympio	[35,50)	2	secondary	married	commerçant	peulh	notaccess	access	notaccess	yes	yes	no	no	(5,12]	0			-1.12825	Middle SEP	9	negative
month5	7110	2017	Female	2022-09-07	10.9	Olympio	[35,50)	2	secondary	married	commerçant	peulh	notaccess	access	notaccess	yes	yes	no	no	(5,12]	0			-1.12813	Middle SEP	5	negative
month5	7111	2014	Male	2022-09-07	11.3	Olympio	[22,35)	2	primary	married	unemployed	peulh	notaccess	access	access	yes	yes	no	yes	[3,5]	0			-2.22748	Low SEP	8	negative
month5	7115	2016	Male	2022-09-07	13.5	Olympio	[35,50)	2	no_formal_education	married	commerçant	peulh	notaccess	notaccess	notaccess	yes	no	no	yes	(5,12]	0			-2.94611	Low SEP	6	negative
month5	7125	2014	Male	2022-09-08	13	Olympio	[50,77]	1	secondary	married	agriculteur	soussou	access	access	notaccess	yes	yes	no	no	(12,35]	0	15	Gf	-0.928246	Middle SEP	8	negative
month5	7126	2014	Male	2022-09-08	13.5	Olympio	[50,77]	1	secondary	married	agriculteur	soussou	access	access	notaccess	yes	yes	no	no	(12,35]	0			-0.928121	Middle SEP	8	negative
month5	7127	2014	Female	2022-09-14	9.6	Olympio	[50,77]	1	secondary	married	agriculteur	soussou	access	access	notaccess	yes	yes	no	no	(12,35]	0			-0.927997	Middle SEP	8	negative
month5	7129	2017	Male	2022-09-13	14.5	Loumafori	[50,77]	1	secondary	married	unemployed	soussou	notaccess	notaccess	notaccess	yes	yes	no	yes	(5,12]	0			0.330841	High SEP	5	negative
month5	7132	2017	Male	2022-09-13	11.4	Loumafori	[50,77]	1	secondary	married	unemployed	soussou	notaccess	notaccess	notaccess	yes	yes	no	yes	(5,12]	0			0.331216	High SEP	5	negative
month5	7137	2014	Male	2022-09-21	22.3	Hafia	[22,35)	2	secondary	married	unemployed	autres	notaccess	access	access	yes	yes	no	yes	(5,12]	0			-2.60437	Low SEP	8	negative
month5	7138	2015	Male	2022-09-13	13.7	Loumafori	[50,77]	1	no_formal_education	married	agriculteur	soussou	access	access	notaccess	yes	yes	no	yes	(5,12]	0			-2.92151	Low SEP	7	negative
month5	7142	2013	Male	2022-09-13	13.2	Loumafori	[50,77]	1	no_formal_education	married	agriculteur	soussou	access	access	notaccess	yes	yes	no	yes	(5,12]	0			-2.92101	Low SEP	9	negative
month5	7143	2015	Female	2022-09-13	11.4	Loumafori	[50,77]	1	no_formal_education	married	agriculteur	soussou	access	access	notaccess	yes	yes	no	yes	(5,12]	0			-2.92088	Low SEP	7	negative
month5	7146	2015	Female	2022-09-21	13.8	Hafia	[22,35)	2	secondary	married	unemployed	autres	notaccess	access	access	yes	yes	no	yes	(5,12]	0			-2.60325	Low SEP	7	negative
month5	7149	2015	Female	2022-09-13	11.3	Loumafori	[50,77]	1	secondary	married	unemployed	autres	access	access	access	yes	yes	no	yes	(12,35]	0			-2.5215	Low SEP	7	negative
month5	7153	2016	Male	2022-09-14	13.7	Loumafori	[50,77]	1	secondary	married	unemployed	peulh	access	access	notaccess	yes	yes	no	yes	(12,35]	0			-3.47306	Low SEP	6	negative
month5	7163	2016	Female	2022-09-22	10.2	Hafia	[22,35)	2	secondary	married	fonctionnaire	peulh	notaccess	notaccess	notaccess	no	no	no	no	(5,12]	0			-1.86619	Middle SEP	6	negative
month5	7168	2016	Male	2022-09-13	13.2	Loumafori	[50,77]	1	secondary	married	unemployed	soussou	access	access	access	yes	yes	no	yes	(5,12]	0			-0.429153	Middle SEP	6	negative
month5	7171	2014	Male	2022-09-22	11.4	Carrefour_Fodéyah	[22,35)	1	secondary	married	unemployed	soussou	notaccess	access	access	no	no	no	no	(5,12]	0			7.09534	High SEP	8	negative
month5	7172	2017	Female	2022-09-22	11	Carrefour_Fodéyah	[22,35)	1	secondary	married	unemployed	soussou	notaccess	access	access	yes	yes	no	yes	(5,12]	0			-1.72674	Middle SEP	5	negative
month5	7173	2014	Male	2022-09-22	13.4	Carrefour_Fodéyah	[22,35)	1	secondary	married	unemployed	soussou	notaccess	access	access	yes	yes	no	yes	(5,12]	0			-1.72661	Middle SEP	8	negative
month5	7183	2013	Male	2022-09-22	11	Carrefour_Fodéyah	[50,77]	2	secondary	single	unemployed	peulh	access	access	access	yes	yes	no	yes	(5,12]	0			-2.7801	Low SEP	9	negative
month5	7184	2016	Female	2022-09-22	11.8	Carrefour_Fodéyah	[50,77]	2	secondary	single	unemployed	peulh	access	access	access	yes	yes	no	yes	(5,12]	0			-2.77997	Low SEP	6	negative
month5	7188	2017	Male	2022-09-22	12	Carrefour_Fodéyah	[22,35)	1	secondary	married	unemployed	soussou	notaccess	access	access	no	no	no	no	(5,12]	0			7.09746	High SEP	5	negative
month5	7189	2017	Male	2022-09-22	14.1	Carrefour_Fodéyah	[50,77]	1	secondary	married	fonctionnaire	peulh	access	notaccess	notaccess	yes	yes	no	yes	(5,12]	0			-0.320337	Middle SEP	5	negative
month5	7191	2016	Female	2022-09-22	11.8	Carrefour_Fodéyah	[50,77]	1	secondary	married	fonctionnaire	peulh	access	notaccess	notaccess	yes	yes	no	yes	(5,12]	0			-0.320087	Middle SEP	6	negative
month5	7203	2015	Female	2022-09-23	14.6	Foulawa	[50,77]	1	secondary	married	fonctionnaire	peulh	access	access	notaccess	yes	yes	no	yes	[3,5]	0			-2.40805	Low SEP	7	negative
month5	7208	2016	Male	2022-09-22	12.9	Carrefour_Fodéyah	[50,77]	1	secondary	married	fonctionnaire	peulh	access	notaccess	notaccess	no	no	no	no	(5,12]	0			7.09996	High SEP	6	negative
month5	7211	2013	Female	2022-09-07	9.7	Tanene	[22,35)	2	primary	married	unemployed	soussou	access	access	notaccess	no	no	no	yes	[3,5]	0			-3.8275	Low SEP	9	negative
month5	7213	2016	Male	2022-09-07	14.2	Olympio	[50,77]	1	secondary	married	agriculteur	soussou	access	access	notaccess	yes	yes	no	no	(12,35]	0			-1.31489	Middle SEP	6	negative
month5	7218	2015	Male	2022-09-07	13	Tanene	[35,50)	2	no_formal_education	married	commerçant	soussou	notaccess	access	notaccess	yes	yes	no	no	(5,12]	0			0.215399	High SEP	7	negative
month5	7221	2015	Female	2022-09-07	9.1	Tanene	[35,50)	2	no_formal_education	married	commerçant	soussou	notaccess	access	notaccess	yes	yes	no	no	(5,12]	0			0.215773	High SEP	7	negative
month5	7228	2013	Female	2022-09-07	11.3	Olympio	[50,77]	1	secondary	married	agriculteur	soussou	access	access	notaccess	yes	yes	no	yes	(5,12]	0			-2.90328	Low SEP	9	negative
month5	7229	2017	Female	2022-09-07	11.9	Olympio	[50,77]	1	secondary	married	agriculteur	soussou	access	access	notaccess	yes	yes	no	yes	(5,12]	0			-2.90315	Low SEP	5	negative
month5	7230	2017	Female	2022-09-07	12.8	Olympio	[50,77]	1	secondary	married	agriculteur	soussou	access	access	notaccess	yes	yes	no	yes	(5,12]	0			-2.90303	Low SEP	5	negative
month5	7237	2014	Female	2022-09-07	12.4	Tanene	[22,35)	2	no_formal_education	married	commerçant	soussou	notaccess	access	notaccess	yes	yes	no	no	(12,35]	0			-2.11031	Middle SEP	8	negative
month5	7242	2014	Female	2022-09-07	10.9	Foulawa	[35,50)	1	primary	married	fonctionnaire	peulh	access	access	notaccess	no	no	no	no	(5,12]	0			7.1042	High SEP	8	negative
month5	7248	2014	Male	2022-09-07	12.3	Tanene	[22,35)	2	no_formal_education	married	unemployed	soussou	access	access	access	yes	yes	no	yes	(5,12]	0			0.0415063	High SEP	8	negative
month5	7249	2017	Male	2022-09-07	12.5	Tanene	[22,35)	2	no_formal_education	married	unemployed	soussou	access	access	access	yes	yes	no	yes	(5,12]	0			0.041631	High SEP	5	negative
month5	7252	2014	Male	2022-09-08	10.3	Tanene	[22,35)	2	primary	married	unemployed	soussou	access	access	notaccess	no	no	no	yes	[3,5]	0			-1.81775	Middle SEP	8	negative
month5	7267	2014	Female	2022-09-05	11.2	Kimara	[35,50)	1	primary	married	unemployed	autres	notaccess	access	notaccess	yes	yes	no	yes	[3,5]	0			0.0284963	High SEP	8	negative
month5	7269	2016	Female	2022-09-07	15.8	Olympio	[22,35)	2	primary	married	unemployed	peulh	notaccess	access	access	yes	yes	no	yes	[3,5]	0			1.0307	High SEP	6	negative
month5	7270	2017	Female	2022-09-07	11.7	Olympio	[22,35)	2	primary	married	unemployed	peulh	notaccess	access	access	yes	yes	no	yes	[3,5]	0			1.03083	High SEP	5	negative
month5	7278	2015	Male	2022-09-09	14.6	Sarata	[50,77]	1	no_formal_education	married	agriculteur	soussou	notaccess	notaccess	notaccess	yes	yes	no	yes	[3,5]	0			-1.5733	Middle SEP	7	negative
month5	7293	2013	Male	2022-09-14	9.1	Layah	[35,50)	2	no_formal_education	married	unemployed	soussou	notaccess	access	notaccess	no	no	no	no	(5,12]	0			7.11056	High SEP	9	negative
month5	7295	2013	Male	2022-09-09	11.3	Sarata	[35,50)	1	no_formal_education	married	commerçant	soussou	notaccess	notaccess	notaccess	no	no	no	no	(5,12]	0			7.11081	High SEP	9	negative
month5	7299	2013	Male	2022-09-09	9.1	Tanene	[22,35)	2	no_formal_education	married	commerçant	soussou	notaccess	access	notaccess	no	no	no	no	(5,12]	0			7.11131	High SEP	9	negative
month5	7301	2013	Male	2022-09-09	14.1	Sarata	[50,77]	1	secondary	married	unemployed	soussou	access	access	access	yes	yes	no	no	(12,35]	0			-0.937437	Middle SEP	9	negative
month5	7312	2013	Female	2022-09-05	10.1	Olympio	[22,35)	2	primary	married	unemployed	peulh	notaccess	access	access	no	no	no	no	(5,12]	0			7.11293	High SEP	9	negative
month5	7319	2013	Male	2022-09-09	15.1	Sarata	[35,50)	1	secondary	married	unemployed	peulh	access	access	access	yes	yes	yes	yes	[3,5]	0			-1.11041	Middle SEP	9	negative
month5	7320	2015	Male	2022-09-09	12.8	Sarata	[35,50)	1	secondary	married	unemployed	peulh	access	access	access	yes	yes	yes	yes	[3,5]	0			-1.11028	Middle SEP	7	negative
month5	7326	2014	Male	2022-09-12	10.3	Layah	[35,50)	2	no_formal_education	married	commerçant	soussou	notaccess	notaccess	notaccess	no	no	no	no	(5,12]	0			7.11468	High SEP	8	negative
month5	7327	2013	Male	2022-09-09	14.3	Maire_daouda	[35,50)	1	secondary	married	fonctionnaire	soussou	access	notaccess	access	no	no	no	yes	[3,5]	0			-0.985579	Middle SEP	9	negative
month5	7329	2017	Male	2022-09-12	13.2	Maire_daouda	[35,50)	1	secondary	married	fonctionnaire	soussou	access	notaccess	access	no	no	no	no	(5,12]	0			0.193145	High SEP	5	negative
month5	7331	2015	Female	2022-09-12	11	Maire_daouda	[35,50)	1	secondary	married	fonctionnaire	soussou	access	notaccess	access	no	no	no	no	(5,12]	0			0.193394	High SEP	7	negative
month5	7332	2015	Female	2022-09-12	10.8	Maire_daouda	[35,50)	1	secondary	married	fonctionnaire	soussou	access	notaccess	access	no	no	no	no	(5,12]	0			0.193519	High SEP	7	negative
month5	7335	2017	Male	2022-09-06	12.1	Kimara	[50,77]	1	secondary	married	unemployed	soussou	access	access	notaccess	yes	yes	no	yes	(12,35]	0			-2.47501	Low SEP	5	negative
month5	7341	2013	Female	2022-09-21	8	Tanene	[35,50)	2	no_formal_education	married	commerçant	soussou	notaccess	access	notaccess	no	no	no	no	(5,12]	747	0	Pf	7.11655	High SEP	9	positive
month5	7345	2015	Male	2022-09-12	13.33	Layah	[35,50)	2	no_formal_education	married	commerçant	soussou	notaccess	notaccess	notaccess	yes	yes	no	yes	[3,5]	0			-0.666386	Middle SEP	7	negative
month5	7348	2016	Female	2022-09-12	11.5	Layah	[35,50)	2	no_formal_education	married	commerçant	soussou	notaccess	notaccess	notaccess	no	no	no	no	(5,12]	0			7.11742	High SEP	6	negative
month5	7355	2016	Male	2022-09-12	9.4	Layah	[50,77]	2	secondary	married	unemployed	soussou	access	access	notaccess	yes	yes	no	no	(5,12]	45200	0	Pf	-1.9496	Middle SEP	6	positive
month5	7373	2014	Male	2022-09-20	11.4	Hafia	[35,50)	2	no_formal_education	married	commerçant	peulh	access	access	access	no	no	no	no	(5,12]	0			-3.27197	Low SEP	8	negative
month5	7376	2014	Male	2022-09-13	12.8	Layah	[22,35)	2	primary	single	unemployed	soussou	access	access	access	no	no	no	yes	[3,5]	0			0.349699	High SEP	8	negative
month5	7379	2013	Male	2022-09-12	11.6	Layah	[22,35)	2	primary	single	unemployed	soussou	access	access	access	no	no	no	yes	[3,5]	0			0.350073	High SEP	9	negative
month5	7380	2016	Female	2022-09-13	13.8	Maire_daouda	[35,50)	2	no_formal_education	married	commerçant	soussou	access	notaccess	access	no	no	no	no	(5,12]	0			7.12141	High SEP	6	negative
month5	7392	2014	Male	2022-09-14	12	Loumafori	[50,77]	1	no_formal_education	married	unemployed	peulh	notaccess	access	notaccess	yes	yes	no	no	(12,35]	0			-3.06514	Low SEP	8	negative
month6	7002	2015	Female	2022-10-24	14.9	Carrefour_Fodéyah	[50,77]	1	secondary	married	fonctionnaire	peulh	access	notaccess	notaccess	yes	yes	no	yes	[3,5]	0			-3.62044	Low SEP	7	negative
month6	7005	2014	Female	2022-10-24	12.8	Foulawa	[35,50)	1	secondary	married	commerçant	peulh	access	access	notaccess	yes	yes	no	yes	(5,12]	0			-1.44814	Middle SEP	8	negative
month6	7007	2013	Male	2022-10-24	14.8	Foulawa	[35,50)	1	secondary	married	commerçant	peulh	access	access	notaccess	yes	yes	no	yes	(5,12]	0			-1.44789	Middle SEP	9	negative
month6	7010	2015	Male	2022-10-25	13	Foulawa	[50,77]	1	secondary	married	unemployed	peulh	notaccess	access	access	yes	yes	no	yes	(5,12]	0			-3.45221	Low SEP	7	negative
month6	7014	2014	Female	2022-10-24	12.3	Foulawa	[50,77]	1	no_formal_education	married	unemployed	peulh	access	access	notaccess	no	no	no	yes	(5,12]	576	0	Pf	-0.420052	Middle SEP	8	positive
month6	7015	2014	Male	2022-10-24	10.1	Foulawa	[50,77]	1	no_formal_education	married	unemployed	peulh	access	access	notaccess	no	no	no	yes	(5,12]	0			-0.419928	Middle SEP	8	negative
month6	7034	2014	Male	2022-10-24	12.3	Foulawa	[22,35)	2	secondary	married	fonctionnaire	peulh	notaccess	access	access	yes	yes	no	no	[3,5]	0			-0.377134	Middle SEP	8	negative
month6	7035	2017	Male	2022-10-24	12.7	Foulawa	[22,35)	2	secondary	married	fonctionnaire	peulh	notaccess	access	access	yes	yes	no	no	[3,5]	0			-0.377009	Middle SEP	5	negative
month6	7036	2015	Male	2022-10-25	11.5	Hafia	[22,35)	2	secondary	married	commerçant	peulh	notaccess	notaccess	access	yes	yes	no	yes	[3,5]	0			-2.2457	Low SEP	7	negative
month6	7037	2014	Female	2022-10-25	12.1	Hafia	[22,35)	2	secondary	married	commerçant	peulh	notaccess	notaccess	access	yes	yes	no	yes	[3,5]	0			-2.24557	Low SEP	8	negative
month6	7045	2017	Female	2022-11-07	13.3	Layah	[22,35)	2	secondary	single	unemployed	soussou	access	access	access	yes	yes	no	yes	(5,12]	0			0.873211	High SEP	5	negative
month6	7050	2017	Male	2022-11-07	11.3	Layah	[50,77]	2	secondary	married	agriculteur	soussou	notaccess	access	notaccess	yes	yes	yes	yes	(12,35]	0			-1.22201	Middle SEP	5	negative
month6	7062	2013	Male	2022-11-07	12.4	Carrefour_Fodéyah	[35,50)	1	primary	married	unemployed	soussou	access	access	access	no	no	no	no	(5,12]	0			7.08175	High SEP	9	negative
month6	7066	2014	Female	2022-11-07	11.8	Layah	[35,50)	2	secondary	married	unemployed	soussou	access	access	access	no	no	no	yes	[3,5]	400	0	Pf	-2.08006	Middle SEP	8	positive
month6	7069	2016	Male	2022-11-10	9.8	Layah	[35,50)	2	no_formal_education	married	unemployed	soussou	notaccess	notaccess	notaccess	no	no	no	yes	(5,12]	0			-2.01041	Middle SEP	6	negative
month6	7073	2016	Female	2022-11-07	10.1	Layah	[35,50)	2	secondary	married	fonctionnaire	soussou	access	access	notaccess	yes	yes	no	no	(5,12]	0			-1.49039	Middle SEP	6	negative
month6	7074	2017	Female	2022-11-07	12.4	Layah	[35,50)	2	secondary	married	fonctionnaire	soussou	access	access	notaccess	yes	yes	no	no	(5,12]	0			-1.49026	Middle SEP	5	negative
month6	7077	2013	Female	2022-11-07	12.7	Sarata	[50,77]	2	no_formal_education	married	agriculteur	autres	access	access	access	yes	yes	no	yes	(12,35]	0			-0.37647	Middle SEP	9	negative
month6	7078	2013	Female	2022-11-07	11.8	Sarata	[50,77]	2	no_formal_education	married	agriculteur	autres	access	access	access	yes	yes	no	yes	(12,35]	0			-0.376346	Middle SEP	9	negative
month6	7089	2015	Male	2022-10-28	9.3	Loumafori	[35,50)	2	secondary	married	unemployed	autres	notaccess	access	notaccess	yes	yes	no	no	[3,5]	0			-0.130382	High SEP	7	negative
month6	7099	2015	Female	2022-10-28	13.3	Olympio	[22,35)	2	primary	married	unemployed	autres	access	access	access	yes	yes	no	yes	(5,12]	0			-0.391181	Middle SEP	7	negative
month6	7100	2015	Female	2022-10-28	11.9	Tanene	[35,50)	2	no_formal_education	married	commerçant	soussou	notaccess	access	notaccess	no	no	no	no	(5,12]	0			7.08649	High SEP	7	negative
month6	7105	2017	Female	2022-10-28	11.5	Sarata	[22,35)	2	no_formal_education	married	unemployed	soussou	notaccess	notaccess	access	no	no	no	no	(5,12]	0			7.08711	High SEP	5	negative
month6	7109	2013	Male	2022-10-28	13.1	Olympio	[35,50)	2	secondary	married	commerçant	peulh	notaccess	access	notaccess	yes	yes	no	no	(5,12]	0			-1.12825	Middle SEP	9	negative
month6	7110	2017	Female	2022-10-28	11.2	Olympio	[35,50)	2	secondary	married	commerçant	peulh	notaccess	access	notaccess	yes	yes	no	no	(5,12]	0			-1.12813	Middle SEP	5	negative
month6	7111	2014	Male	2022-10-28	11.4	Olympio	[22,35)	2	primary	married	unemployed	peulh	notaccess	access	access	yes	yes	no	yes	[3,5]	0			-2.22748	Low SEP	8	negative
month6	7115	2016	Male	2022-10-31	14.5	Olympio	[35,50)	2	no_formal_education	married	commerçant	peulh	notaccess	notaccess	notaccess	yes	no	no	yes	(5,12]	0			-2.94611	Low SEP	6	negative
month6	7125	2014	Male	2022-10-28	10.7	Olympio	[50,77]	1	secondary	married	agriculteur	soussou	access	access	notaccess	yes	yes	no	no	(12,35]	0			-0.928246	Middle SEP	8	negative
month6	7126	2014	Male	2022-10-28	12.1	Olympio	[50,77]	1	secondary	married	agriculteur	soussou	access	access	notaccess	yes	yes	no	no	(12,35]	0			-0.928121	Middle SEP	8	negative
month6	7127	2014	Female	2022-10-28	12	Olympio	[50,77]	1	secondary	married	agriculteur	soussou	access	access	notaccess	yes	yes	no	no	(12,35]	0			-0.927997	Middle SEP	8	negative
month6	7129	2017	Male	2022-11-08	14	Loumafori	[50,77]	1	secondary	married	unemployed	soussou	notaccess	notaccess	notaccess	yes	yes	no	yes	(5,12]	0			0.330841	High SEP	5	negative
month6	7132	2017	Male	2022-11-08	12.1	Loumafori	[50,77]	1	secondary	married	unemployed	soussou	notaccess	notaccess	notaccess	yes	yes	no	yes	(5,12]	0			0.331216	High SEP	5	negative
month6	7137	2014	Male	2022-11-10	23.1	Hafia	[22,35)	2	secondary	married	unemployed	autres	notaccess	access	access	yes	yes	no	yes	(5,12]	0			-2.60437	Low SEP	8	negative
month6	7138	2015	Male	2022-11-09	16	Loumafori	[50,77]	1	no_formal_education	married	agriculteur	soussou	access	access	notaccess	yes	yes	no	yes	(5,12]	0	24	Gf	-2.92151	Low SEP	7	negative
month6	7142	2013	Male	2022-11-09	13.2	Loumafori	[50,77]	1	no_formal_education	married	agriculteur	soussou	access	access	notaccess	yes	yes	no	yes	(5,12]	0			-2.92101	Low SEP	9	negative
month6	7143	2015	Female	2022-11-09	12.1	Loumafori	[50,77]	1	no_formal_education	married	agriculteur	soussou	access	access	notaccess	yes	yes	no	yes	(5,12]	0			-2.92088	Low SEP	7	negative
month6	7146	2015	Female	2022-11-10	14.9	Hafia	[22,35)	2	secondary	married	unemployed	autres	notaccess	access	access	yes	yes	no	yes	(5,12]	0			-2.60325	Low SEP	7	negative
month6	7149	2015	Female	2022-11-09	11.9	Loumafori	[50,77]	1	secondary	married	unemployed	autres	access	access	access	yes	yes	no	yes	(12,35]	0			-2.5215	Low SEP	7	negative
month6	7153	2016	Male	2022-11-08	12.5	Loumafori	[50,77]	1	secondary	married	unemployed	peulh	access	access	notaccess	yes	yes	no	yes	(12,35]	0			-3.47306	Low SEP	6	negative
month6	7163	2016	Female	2022-11-10	10.5	Hafia	[22,35)	2	secondary	married	fonctionnaire	peulh	notaccess	notaccess	notaccess	no	no	no	no	(5,12]	0			-1.86619	Middle SEP	6	negative
month6	7168	2016	Male	2022-11-09	12.9	Loumafori	[50,77]	1	secondary	married	unemployed	soussou	access	access	access	yes	yes	no	yes	(5,12]	0			-0.429153	Middle SEP	6	negative
month6	7171	2014	Male	2022-11-11	10.6	Carrefour_Fodéyah	[22,35)	1	secondary	married	unemployed	soussou	notaccess	access	access	no	no	no	no	(5,12]	0			7.09534	High SEP	8	negative
month6	7172	2017	Female	2022-11-15	11.9	Carrefour_Fodéyah	[22,35)	1	secondary	married	unemployed	soussou	notaccess	access	access	yes	yes	no	yes	(5,12]	0			-1.72674	Middle SEP	5	negative
month6	7173	2014	Male	2022-11-11	12.09	Carrefour_Fodéyah	[22,35)	1	secondary	married	unemployed	soussou	notaccess	access	access	yes	yes	no	yes	(5,12]	0			-1.72661	Middle SEP	8	negative
month6	7183	2013	Male	2022-11-14	12.1	Carrefour_Fodéyah	[50,77]	2	secondary	single	unemployed	peulh	access	access	access	yes	yes	no	yes	(5,12]	0			-2.7801	Low SEP	9	negative
month6	7184	2016	Female	2022-11-14	10.2	Carrefour_Fodéyah	[50,77]	2	secondary	single	unemployed	peulh	access	access	access	yes	yes	no	yes	(5,12]	0			-2.77997	Low SEP	6	negative
month6	7188	2017	Male	2022-11-11	12.1	Carrefour_Fodéyah	[22,35)	1	secondary	married	unemployed	soussou	notaccess	access	access	no	no	no	no	(5,12]	0			7.09746	High SEP	5	negative
month6	7189	2017	Male	2022-11-16	13.2	Carrefour_Fodéyah	[50,77]	1	secondary	married	fonctionnaire	peulh	access	notaccess	notaccess	yes	yes	no	yes	(5,12]	0			-0.320337	Middle SEP	5	negative
month6	7191	2016	Female	2022-11-16	12.6	Carrefour_Fodéyah	[50,77]	1	secondary	married	fonctionnaire	peulh	access	notaccess	notaccess	yes	yes	no	yes	(5,12]	0			-0.320087	Middle SEP	6	negative
month6	7203	2015	Female	2022-11-17	11.7	Foulawa	[50,77]	1	secondary	married	fonctionnaire	peulh	access	access	notaccess	yes	yes	no	yes	[3,5]	0			-2.40805	Low SEP	7	negative
month6	7208	2016	Male	2022-11-15	11.9	Carrefour_Fodéyah	[50,77]	1	secondary	married	fonctionnaire	peulh	access	notaccess	notaccess	no	no	no	no	(5,12]	0			7.09996	High SEP	6	negative
month6	7211	2013	Female	2022-11-01	13	Tanene	[22,35)	2	primary	married	unemployed	soussou	access	access	notaccess	no	no	no	yes	[3,5]	0			-3.8275	Low SEP	9	negative
month6	7213	2016	Male	2022-11-01	12.7	Olympio	[50,77]	1	secondary	married	agriculteur	soussou	access	access	notaccess	yes	yes	no	no	(12,35]	0			-1.31489	Middle SEP	6	negative
month6	7218	2015	Male	2022-11-01	13	Tanene	[35,50)	2	no_formal_education	married	commerçant	soussou	notaccess	access	notaccess	yes	yes	no	no	(5,12]	0			0.215399	High SEP	7	negative
month6	7221	2015	Female	2022-11-01	12	Tanene	[35,50)	2	no_formal_education	married	commerçant	soussou	notaccess	access	notaccess	yes	yes	no	no	(5,12]	0			0.215773	High SEP	7	negative
month6	7228	2013	Female	2022-11-01	12.4	Olympio	[50,77]	1	secondary	married	agriculteur	soussou	access	access	notaccess	yes	yes	no	yes	(5,12]	0			-2.90328	Low SEP	9	negative
month6	7230	2017	Female	2022-11-01	14	Olympio	[50,77]	1	secondary	married	agriculteur	soussou	access	access	notaccess	yes	yes	no	yes	(5,12]	0			-2.90303	Low SEP	5	negative
month6	7233	2013	Male	2022-10-26	13.3	Sarata	[22,35)	2	primary	married	unemployed	soussou	access	access	notaccess	no	no	no	no	(5,12]	1600	0	Pf	7.10308	High SEP	9	positive
month6	7237	2014	Female	2022-10-31	12.6	Tanene	[22,35)	2	no_formal_education	married	commerçant	soussou	notaccess	access	notaccess	yes	yes	no	no	(12,35]	0			-2.11031	Middle SEP	8	negative
month6	7242	2014	Female	2022-10-31	11.2	Layah	[35,50)	2	no_formal_education	single	commerçant	soussou	notaccess	notaccess	notaccess	no	no	no	no	(5,12]	0			7.1042	High SEP	8	negative
month6	7248	2014	Male	2022-11-09	12.8	Tanene	[22,35)	2	no_formal_education	married	unemployed	soussou	access	access	access	yes	yes	no	yes	(5,12]	0			0.0415063	High SEP	8	negative
month6	7249	2017	Male	2022-11-02	13.1	Tanene	[22,35)	2	no_formal_education	married	unemployed	soussou	access	access	access	yes	yes	no	yes	(5,12]	0			0.041631	High SEP	5	negative
month6	7252	2014	Male	2022-10-31	10	Tanene	[22,35)	2	primary	married	unemployed	soussou	access	access	notaccess	no	no	no	yes	[3,5]	0			-1.81775	Middle SEP	8	negative
month6	7267	2014	Female	2022-10-27	11.8	Kimara	[35,50)	1	primary	married	unemployed	autres	notaccess	access	notaccess	yes	yes	no	yes	[3,5]	0			0.0284963	High SEP	8	negative
month6	7269	2016	Female	2022-10-27	13.5	Olympio	[22,35)	2	primary	married	unemployed	peulh	notaccess	access	access	yes	yes	no	yes	[3,5]	0			1.0307	High SEP	6	negative
month6	7270	2017	Female	2022-10-26	11.6	Olympio	[22,35)	2	primary	married	unemployed	peulh	notaccess	access	access	yes	yes	no	yes	[3,5]	0			1.03083	High SEP	5	negative
month6	7278	2015	Male	2022-11-03	12.4	Sarata	[50,77]	1	no_formal_education	married	agriculteur	soussou	notaccess	notaccess	notaccess	yes	yes	no	yes	[3,5]	0			-1.5733	Middle SEP	7	negative
month6	7293	2013	Male	2022-11-03	10	Layah	[35,50)	2	no_formal_education	married	commerçant	soussou	notaccess	notaccess	notaccess	no	no	no	no	(5,12]	0			7.11056	High SEP	9	negative
month6	7295	2013	Male	2022-11-03	14.1	Layah	[35,50)	2	no_formal_education	married	unemployed	soussou	notaccess	notaccess	notaccess	no	no	no	no	(5,12]	0			7.11081	High SEP	9	negative
month6	7296	2017	Male	2022-11-03	12.6	Layah	[35,50)	2	no_formal_education	married	unemployed	soussou	notaccess	notaccess	notaccess	no	no	no	no	(5,12]	0			7.11093	High SEP	5	negative
month6	7299	2013	Male	2022-11-03	10.8	Tanene	[22,35)	2	no_formal_education	married	commerçant	soussou	notaccess	access	notaccess	no	no	no	no	(5,12]	0			7.11131	High SEP	9	negative
month6	7301	2013	Male	2022-11-07	14.3	Sarata	[50,77]	1	secondary	married	unemployed	soussou	access	access	access	yes	yes	no	no	(12,35]	0			-0.937437	Middle SEP	9	negative
month6	7305	2015	Male	2022-11-03	10.9	Foulawa	[35,50)	1	secondary	married	fonctionnaire	peulh	notaccess	access	access	no	no	no	no	(5,12]	0			7.11206	High SEP	7	negative
month6	7319	2013	Male	2022-11-03	14.6	Sarata	[35,50)	1	secondary	married	unemployed	peulh	access	access	access	yes	yes	yes	yes	[3,5]	0			-1.11041	Middle SEP	9	negative
month6	7320	2015	Male	2022-11-03	11.8	Sarata	[35,50)	1	secondary	married	unemployed	peulh	access	access	access	yes	yes	yes	yes	[3,5]	0			-1.11028	Middle SEP	7	negative
month6	7326	2014	Male	2022-11-07	12.6	Layah	[35,50)	2	no_formal_education	married	commerçant	soussou	notaccess	notaccess	notaccess	no	no	no	no	(5,12]	0			7.11468	High SEP	8	negative
month6	7327	2013	Male	2022-11-02	12.9	Maire_daouda	[35,50)	1	secondary	married	fonctionnaire	soussou	access	notaccess	access	no	no	no	yes	[3,5]	0			-0.985579	Middle SEP	9	negative
month6	7329	2017	Male	2022-11-03	12.2	Maire_daouda	[35,50)	1	secondary	married	fonctionnaire	soussou	access	notaccess	access	no	no	no	no	(5,12]	0			0.193145	High SEP	5	negative
month6	7331	2015	Female	2022-11-03	11.9	Maire_daouda	[35,50)	1	secondary	married	fonctionnaire	soussou	access	notaccess	access	no	no	no	no	(5,12]	0			0.193394	High SEP	7	negative
month6	7332	2015	Female	2022-11-03	11.8	Maire_daouda	[35,50)	1	secondary	married	fonctionnaire	soussou	access	notaccess	access	no	no	no	no	(5,12]	0			0.193519	High SEP	7	negative
month6	7335	2017	Male	2022-10-26	14.8	Kimara	[50,77]	1	secondary	married	unemployed	soussou	access	access	notaccess	yes	yes	no	yes	(12,35]	0			-2.47501	Low SEP	5	negative
month6	7341	2013	Female	2022-11-10	6.9	Tanene	[35,50)	2	no_formal_education	married	commerçant	soussou	notaccess	access	notaccess	no	no	no	no	(5,12]	0			7.11655	High SEP	9	negative
month6	7345	2015	Male	2022-11-07	9.5	Layah	[35,50)	2	no_formal_education	married	commerçant	soussou	notaccess	notaccess	notaccess	yes	yes	no	yes	[3,5]	0			-0.666386	Middle SEP	7	negative
month6	7351	2015	Male	2022-11-07	14.6	Layah	[22,35)	2	primary	married	unemployed	soussou	access	access	access	no	no	no	no	(5,12]	0			7.1178	High SEP	7	negative
month6	7355	2016	Male	2022-11-10	10.7	Layah	[50,77]	2	secondary	married	unemployed	soussou	access	access	notaccess	yes	yes	no	no	(5,12]	10560	0	Pf	-1.9496	Middle SEP	6	positive
month6	7373	2014	Male	2022-11-10	12.5	Hafia	[35,50)	2	no_formal_education	married	commerçant	peulh	access	access	access	no	no	no	no	(5,12]	0			-3.27197	Low SEP	8	negative
month6	7379	2013	Male	2022-11-07	12.4	Layah	[22,35)	2	primary	single	unemployed	soussou	access	access	access	no	no	no	yes	[3,5]	0			0.350073	High SEP	9	negative
month6	7380	2016	Female	2022-11-08	13.2	Foulawa	[35,50)	1	no_formal_education	married	commerçant	peulh	notaccess	access	notaccess	no	no	no	no	(5,12]	0			7.12141	High SEP	6	negative
month6	7392	2014	Male	2022-11-08	12.3	Loumafori	[50,77]	1	no_formal_education	married	unemployed	peulh	notaccess	access	notaccess	yes	yes	no	no	(12,35]	0			-3.06514	Low SEP	8	negative
month7	7004	2017	Male	2022-12-14	12.13	Foulawa	[35,50)	1	secondary	married	commerçant	peulh	access	access	notaccess	yes	yes	no	yes	(5,12]	0			-1.44827	Middle SEP	5	negative
month7	7015	2015	Male	2022-12-14	10.8	Foulawa	[50,77]	1	no_formal_education	married	unemployed	peulh	access	access	notaccess	no	no	no	yes	(5,12]	0			-0.419928	Middle SEP	7	negative
month7	7019	2017	Male	2022-12-14	11.1	Foulawa	[35,50)	1	secondary	married	fonctionnaire	peulh	notaccess	access	access	yes	no	no	no	(5,12]	0			0.081847	High SEP	5	negative
month7	7025	2014	Female	2022-12-14	12.3	Foulawa	[50,77]	1	no_formal_education	married	agriculteur	peulh	notaccess	notaccess	notaccess	no	no	no	no	(5,12]	0			7.07713	High SEP	8	negative
month7	7028	2014	Female	2022-12-17	11.2	Foulawa	[50,77]	1	secondary	married	fonctionnaire	peulh	access	access	access	no	no	no	no	(5,12]	0			-4.27079	Low SEP	8	negative
month7	7030	2016	Female	2022-12-17	15.6	Foulawa	[50,77]	1	secondary	married	fonctionnaire	peulh	access	access	access	no	no	no	no	(5,12]	0			-4.27054	Low SEP	6	negative
month7	7031	2013	Male	2022-12-19	12.6	Carrefour_Fodéyah	[35,50)	2	secondary	married	unemployed	peulh	notaccess	access	access	no	no	no	yes	[3,5]	0			-4.49309	Low SEP	9	negative
month7	7034	2013	Male	2022-12-15	12.3	Foulawa	[22,35)	2	secondary	married	fonctionnaire	peulh	notaccess	access	access	yes	yes	no	no	[3,5]	0			-0.377134	Middle SEP	9	negative
month7	7037	2016	Male	2022-12-15	13.8	Hafia	[22,35)	2	secondary	married	commerçant	peulh	notaccess	notaccess	access	yes	yes	no	yes	[3,5]	0			-2.24557	Low SEP	6	negative
month7	7045	2017	Female	2022-12-22	10	Layah	[22,35)	2	secondary	single	unemployed	soussou	access	access	access	yes	yes	no	yes	(5,12]	500	0	Pf	0.873211	High SEP	5	positive
month7	7050	2017	Male	2022-12-22	10.9	Layah	[50,77]	2	secondary	married	agriculteur	soussou	notaccess	access	notaccess	yes	yes	yes	yes	(12,35]	0			-1.22201	Middle SEP	5	negative
month7	7062	2013	Male	2022-12-23	12	Carrefour_Fodéyah	[35,50)	1	primary	married	unemployed	soussou	access	access	access	no	no	no	no	(5,12]	0			7.08175	High SEP	9	negative
month7	7066	2014	Female	2022-12-22	11.2	Layah	[35,50)	2	secondary	married	unemployed	soussou	access	access	access	no	no	no	yes	[3,5]	0			-2.08006	Middle SEP	8	negative
month7	7069	2016	Male	2022-12-22	11.1	Layah	[35,50)	2	no_formal_education	married	unemployed	soussou	notaccess	notaccess	notaccess	no	no	no	yes	(5,12]	6900	0	Pf	-2.01041	Middle SEP	6	positive
month7	7073	2016	Female	2022-12-23	11.6	Layah	[35,50)	2	secondary	married	fonctionnaire	soussou	access	access	notaccess	yes	yes	no	no	(5,12]	0			-1.49039	Middle SEP	6	negative
month7	7074	2017	Female	2022-12-22	10.4	Layah	[35,50)	2	secondary	married	fonctionnaire	soussou	access	access	notaccess	yes	yes	no	no	(5,12]	0			-1.49026	Middle SEP	5	negative
month7	7077	2013	Female	2022-12-22	13.1	Sarata	[50,77]	2	no_formal_education	married	agriculteur	autres	access	access	access	yes	yes	no	yes	(12,35]	0			-0.37647	Middle SEP	9	negative
month7	7078	2013	Female	2022-12-22	11.4	Sarata	[50,77]	2	no_formal_education	married	agriculteur	autres	access	access	access	yes	yes	no	yes	(12,35]	0			-0.376346	Middle SEP	9	negative
month7	7088	2015	Male	2022-12-16	10.4	Loumafori	[35,50)	2	secondary	married	unemployed	autres	notaccess	access	notaccess	yes	yes	no	no	[3,5]	0			-0.130506	High SEP	7	negative
month7	7089	2015	Male	2022-12-16	7.5	Loumafori	[35,50)	2	secondary	married	unemployed	autres	notaccess	access	notaccess	yes	yes	no	no	[3,5]	0			-0.130382	High SEP	7	negative
month7	7092	2015	Male	2022-12-16	12.1	Olympio	[22,35)	2	secondary	single	unemployed	autres	notaccess	access	access	yes	yes	no	yes	(5,12]	0			-3.96953	Low SEP	7	negative
month7	7099	2015	Female	2022-12-16	13.4	Olympio	[22,35)	2	primary	married	unemployed	autres	access	access	access	yes	yes	no	yes	(5,12]	0			-0.391181	Middle SEP	7	negative
month7	7100	2015	Female	2022-12-16	11.5	Tanene	[35,50)	2	no_formal_education	married	commerçant	soussou	notaccess	access	notaccess	no	no	no	no	(5,12]	0			7.08649	High SEP	7	negative
month7	7105	2017	Female	2022-12-16	12.1	Sarata	[22,35)	2	no_formal_education	married	unemployed	soussou	notaccess	notaccess	access	no	no	no	no	(5,12]	0			7.08711	High SEP	5	negative
month7	7109	2013	Male	2022-12-16	11.8	Olympio	[35,50)	2	secondary	married	commerçant	peulh	notaccess	access	notaccess	yes	yes	no	no	(5,12]	0			-1.12825	Middle SEP	9	negative
month7	7110	2017	Female	2022-12-16	11.9	Olympio	[35,50)	2	secondary	married	commerçant	peulh	notaccess	access	notaccess	yes	yes	no	no	(5,12]	0			-1.12813	Middle SEP	5	negative
month7	7111	2014	Male	2022-12-16	13	Olympio	[22,35)	2	primary	married	unemployed	peulh	notaccess	access	access	yes	yes	no	yes	[3,5]	0			-2.22748	Low SEP	8	negative
month7	7115	2016	Male	2022-12-16	12.5	Olympio	[35,50)	2	no_formal_education	married	commerçant	peulh	notaccess	notaccess	notaccess	yes	no	no	yes	(5,12]	0			-2.94611	Low SEP	6	negative
month7	7125	2014	Male	2022-12-16	9.37	Olympio	[50,77]	1	secondary	married	agriculteur	soussou	access	access	notaccess	yes	yes	no	no	(12,35]	0			-0.928246	Middle SEP	8	negative
month7	7126	2014	Male	2022-12-16	11.7	Olympio	[50,77]	1	secondary	married	agriculteur	soussou	access	access	notaccess	yes	yes	no	no	(12,35]	0			-0.928121	Middle SEP	8	negative
month7	7127	2014	Female	2022-12-16	10.5	Olympio	[50,77]	1	secondary	married	agriculteur	soussou	access	access	notaccess	yes	yes	no	no	(12,35]	2850	0	Pf	-0.927997	Middle SEP	8	positive
month7	7129	2017	Male	2022-12-27	14.3	Loumafori	[50,77]	1	secondary	married	unemployed	soussou	notaccess	notaccess	notaccess	yes	yes	no	yes	(5,12]	0			0.330841	High SEP	5	negative
month7	7132	2017	Male	2022-12-27	11.3	Loumafori	[50,77]	1	secondary	married	unemployed	soussou	notaccess	notaccess	notaccess	yes	yes	no	yes	(5,12]	0			0.331216	High SEP	5	negative
month7	7137	2014	Male	2022-12-23	23	Hafia	[22,35)	2	secondary	married	unemployed	autres	notaccess	access	access	yes	yes	no	yes	(5,12]	0			-2.60437	Low SEP	8	negative
month7	7138	2015	Male	2022-12-27	11.5	Loumafori	[50,77]	1	no_formal_education	married	agriculteur	soussou	access	access	notaccess	yes	yes	no	yes	(5,12]	0			-2.92151	Low SEP	7	negative
month7	7142	2013	Male	2022-12-27	11.5	Loumafori	[50,77]	1	no_formal_education	married	agriculteur	soussou	access	access	notaccess	yes	yes	no	yes	(5,12]	0			-2.92101	Low SEP	9	negative
month7	7143	2015	Female	2022-12-27	12.4	Loumafori	[50,77]	1	no_formal_education	married	agriculteur	soussou	access	access	notaccess	yes	yes	no	yes	(5,12]	0			-2.92088	Low SEP	7	negative
month7	7146	2015	Female	2022-12-23	12.9	Hafia	[22,35)	2	secondary	married	unemployed	autres	notaccess	access	access	yes	yes	no	yes	(5,12]	0			-2.60325	Low SEP	7	negative
month7	7149	2015	Female	2022-12-27	10.9	Loumafori	[50,77]	1	secondary	married	unemployed	autres	access	access	access	yes	yes	no	yes	(12,35]	0			-2.5215	Low SEP	7	negative
month7	7153	2016	Male	2022-12-27	10.9	Loumafori	[50,77]	1	secondary	married	unemployed	peulh	access	access	notaccess	yes	yes	no	yes	(12,35]	0			-3.47306	Low SEP	6	negative
month7	7163	2016	Female	2022-12-23	10	Hafia	[22,35)	2	secondary	married	fonctionnaire	peulh	notaccess	notaccess	notaccess	no	no	no	no	(5,12]	0			-1.86619	Middle SEP	6	negative
month7	7168	2016	Male	2022-12-27	14.5	Loumafori	[50,77]	1	secondary	married	unemployed	soussou	access	access	access	yes	yes	no	yes	(5,12]	0			-0.429153	Middle SEP	6	negative
month7	7171	2014	Male	2022-12-21	10.4	Carrefour_Fodéyah	[22,35)	1	secondary	married	unemployed	soussou	notaccess	access	access	no	no	no	no	(5,12]	0			7.09534	High SEP	8	negative
month7	7172	2017	Female	2022-12-21	10.3	Carrefour_Fodéyah	[22,35)	1	secondary	married	unemployed	soussou	notaccess	access	access	yes	yes	no	yes	(5,12]	0			-1.72674	Middle SEP	5	negative
month7	7173	2014	Male	2022-12-21	11.8	Carrefour_Fodéyah	[22,35)	1	secondary	married	unemployed	soussou	notaccess	access	access	yes	yes	no	yes	(5,12]	0			-1.72661	Middle SEP	8	negative
month7	7183	2013	Male	2022-12-21	10.7	Carrefour_Fodéyah	[50,77]	2	secondary	single	unemployed	peulh	access	access	access	yes	yes	no	yes	(5,12]	0			-2.7801	Low SEP	9	negative
month7	7184	2016	Female	2022-12-21	11.8	Carrefour_Fodéyah	[50,77]	2	secondary	single	unemployed	peulh	access	access	access	yes	yes	no	yes	(5,12]	0			-2.77997	Low SEP	6	negative
month7	7188	2017	Male	2022-12-21	10.8	Carrefour_Fodéyah	[22,35)	1	secondary	married	unemployed	soussou	notaccess	access	access	no	no	no	no	(5,12]	0			7.09746	High SEP	5	negative
month7	7189	2017	Male	2022-12-21	14.1	Carrefour_Fodéyah	[50,77]	1	secondary	married	fonctionnaire	peulh	access	notaccess	notaccess	yes	yes	no	yes	(5,12]	0			-0.320337	Middle SEP	5	negative
month7	7191	2016	Female	2022-12-21	11.4	Carrefour_Fodéyah	[50,77]	1	secondary	married	fonctionnaire	peulh	access	notaccess	notaccess	yes	yes	no	yes	(5,12]	0			-0.320087	Middle SEP	6	negative
month7	7203	2015	Female	2022-12-22	12.2	Foulawa	[50,77]	1	secondary	married	fonctionnaire	peulh	access	access	notaccess	yes	yes	no	yes	[3,5]	0			-2.40805	Low SEP	7	negative
month7	7208	2016	Male	2022-12-21	11	Carrefour_Fodéyah	[50,77]	1	secondary	married	fonctionnaire	peulh	access	notaccess	notaccess	no	no	no	no	(5,12]	0			7.09996	High SEP	6	negative
month7	7211	2013	Female	2022-12-19	12.1	Tanene	[22,35)	2	primary	married	unemployed	soussou	access	access	notaccess	no	no	no	yes	[3,5]	0			-3.8275	Low SEP	9	negative
month7	7213	2016	Male	2022-12-19	13.3	Olympio	[50,77]	1	secondary	married	agriculteur	soussou	access	access	notaccess	yes	yes	no	no	(12,35]	0			-1.31489	Middle SEP	6	negative
month7	7218	2015	Male	2022-12-19	12.3	Tanene	[35,50)	2	no_formal_education	married	commerçant	soussou	notaccess	access	notaccess	yes	yes	no	no	(5,12]	0			0.215399	High SEP	7	negative
month7	7221	2015	Female	2022-12-19	9.8	Tanene	[35,50)	2	no_formal_education	married	commerçant	soussou	notaccess	access	notaccess	yes	yes	no	no	(5,12]	0			0.215773	High SEP	7	negative
month7	7228	2013	Female	2022-12-19	11.2	Olympio	[50,77]	1	secondary	married	agriculteur	soussou	access	access	notaccess	yes	yes	no	yes	(5,12]	0			-2.90328	Low SEP	9	negative
month7	7230	2017	Female	2022-12-19	10.4	Olympio	[50,77]	1	secondary	married	agriculteur	soussou	access	access	notaccess	yes	yes	no	yes	(5,12]	0			-2.90303	Low SEP	5	negative
month7	7233	2013	Male	2022-12-19	12.3	Sarata	[22,35)	2	primary	married	unemployed	soussou	access	access	notaccess	no	no	no	no	(5,12]	0			7.10308	High SEP	9	negative
month7	7237	2014	Female	2022-12-19	10.5	Tanene	[22,35)	2	no_formal_education	married	commerçant	soussou	notaccess	access	notaccess	yes	yes	no	no	(12,35]	0			-2.11031	Middle SEP	8	negative
month7	7248	2014	Male	2022-12-20	9.5	Tanene	[22,35)	2	no_formal_education	married	unemployed	soussou	access	access	access	yes	yes	no	yes	(5,12]	120242	0	Pf	0.0415063	High SEP	8	positive
month7	7249	2017	Male	2022-12-19	11.9	Tanene	[22,35)	2	no_formal_education	married	unemployed	soussou	access	access	access	yes	yes	no	yes	(5,12]	0			0.041631	High SEP	5	negative
month7	7252	2014	Male	2022-12-19	10.8	Tanene	[22,35)	2	primary	married	unemployed	soussou	access	access	notaccess	no	no	no	yes	[3,5]	0			-1.81775	Middle SEP	8	negative
month7	7267	2014	Female	2022-12-14	11.2	Kimara	[35,50)	1	primary	married	unemployed	autres	notaccess	access	notaccess	yes	yes	no	yes	[3,5]	0			0.0284963	High SEP	8	negative
month7	7269	2016	Female	2022-12-14	14.2	Olympio	[22,35)	2	primary	married	unemployed	peulh	notaccess	access	access	yes	yes	no	yes	[3,5]	0			1.0307	High SEP	6	negative
month7	7270	2017	Female	2022-12-14	12	Olympio	[22,35)	2	primary	married	unemployed	peulh	notaccess	access	access	yes	yes	no	yes	[3,5]	0			1.03083	High SEP	5	negative
month7	7278	2015	Male	2022-12-20	12.2	Sarata	[50,77]	1	no_formal_education	married	agriculteur	soussou	notaccess	notaccess	notaccess	yes	yes	no	yes	[3,5]	0			-1.5733	Middle SEP	7	negative
month7	7293	2013	Male	2022-12-20	9.7	Layah	[35,50)	2	no_formal_education	married	unemployed	soussou	notaccess	access	notaccess	no	no	no	no	(5,12]	0			7.11056	High SEP	9	negative
month7	7295	2013	Male	2022-12-20	12.2	Layah	[35,50)	2	no_formal_education	married	unemployed	soussou	notaccess	access	notaccess	no	no	no	no	(5,12]	0			7.11081	High SEP	9	negative
month7	7296	2017	Male	2022-12-20	10	Foulawa	[35,50)	1	no_formal_education	married	commerçant	peulh	notaccess	access	notaccess	no	no	no	no	(5,12]	0			7.11093	High SEP	5	negative
month7	7299	2013	Male	2022-12-20	10	Tanene	[22,35)	2	no_formal_education	married	commerçant	soussou	notaccess	access	notaccess	no	no	no	no	(5,12]	0			7.11131	High SEP	9	negative
month7	7301	2013	Male	2022-12-20	13.9	Sarata	[50,77]	1	secondary	married	unemployed	soussou	access	access	access	yes	yes	no	no	(12,35]	6720	0	Pf	-0.937437	Middle SEP	9	positive
month7	7302	2017	Male	2022-12-20	14.6	Sarata	[50,77]	1	secondary	married	unemployed	soussou	access	access	access	yes	yes	no	no	(12,35]	3520	0	Pf	-0.937312	Middle SEP	5	positive
month7	7305	2015	Male	2022-12-20	12.4	Foulawa	[35,50)	1	secondary	married	fonctionnaire	peulh	notaccess	access	access	no	no	no	no	(5,12]	0	24	Pf	7.11206	High SEP	7	negative
month7	7319	2013	Male	2022-12-20	14.2	Sarata	[35,50)	1	secondary	married	unemployed	peulh	access	access	access	yes	yes	yes	yes	[3,5]	0			-1.11041	Middle SEP	9	negative
month7	7320	2015	Male	2022-12-20	11.4	Sarata	[35,50)	1	secondary	married	unemployed	peulh	access	access	access	yes	yes	yes	yes	[3,5]	0			-1.11028	Middle SEP	7	negative
month7	7326	2014	Male	2022-12-22	11	Layah	[35,50)	2	no_formal_education	married	commerçant	soussou	notaccess	notaccess	notaccess	no	no	no	no	(5,12]	0			7.11468	High SEP	8	negative
month7	7327	2013	Male	2022-12-19	14.7	Maire_daouda	[35,50)	1	secondary	married	fonctionnaire	soussou	access	notaccess	access	no	no	no	yes	[3,5]	0			-0.985579	Middle SEP	9	negative
month7	7329	2017	Male	2022-12-19	14.2	Maire_daouda	[35,50)	1	secondary	married	fonctionnaire	soussou	access	notaccess	access	no	no	no	no	(5,12]	0			0.193145	High SEP	5	negative
month7	7331	2015	Female	2022-12-19	10.6	Maire_daouda	[35,50)	1	secondary	married	fonctionnaire	soussou	access	notaccess	access	no	no	no	no	(5,12]	0			0.193394	High SEP	7	negative
month7	7332	2015	Female	2022-12-19	11.7	Maire_daouda	[35,50)	1	secondary	married	fonctionnaire	soussou	access	notaccess	access	no	no	no	no	(5,12]	0			0.193519	High SEP	7	negative
month7	7335	2017	Male	2022-12-14	12.4	Kimara	[50,77]	1	secondary	married	unemployed	soussou	access	access	notaccess	yes	yes	no	yes	(12,35]	54000	0	Pf	-2.47501	Low SEP	5	positive
month7	7341	2013	Female	2022-12-23	7.6	Tanene	[35,50)	2	no_formal_education	married	commerçant	soussou	notaccess	access	notaccess	no	no	no	no	(5,12]	0			7.11655	High SEP	9	negative
month7	7345	2015	Male	2022-12-22	12.7	Layah	[35,50)	2	no_formal_education	married	commerçant	soussou	notaccess	notaccess	notaccess	yes	yes	no	yes	[3,5]	0			-0.666386	Middle SEP	7	negative
month7	7348	2016	Female	2022-12-22	11.4	Layah	[35,50)	2	no_formal_education	married	commerçant	soussou	notaccess	notaccess	notaccess	no	no	no	no	(5,12]	0			7.11742	High SEP	6	negative
month7	7351	2015	Male	2022-12-22	12	Layah	[22,35)	2	primary	married	unemployed	soussou	access	access	access	no	no	no	no	(5,12]	0			7.1178	High SEP	7	negative
month7	7355	2016	Male	2022-12-23	8.9	Layah	[50,77]	2	secondary	married	unemployed	soussou	access	access	notaccess	yes	yes	no	no	(5,12]	0			-1.9496	Middle SEP	6	negative
month7	7373	2014	Male	2022-12-23	10.5	Hafia	[35,50)	2	no_formal_education	married	commerçant	peulh	access	access	access	no	no	no	no	(5,12]	0			-3.27197	Low SEP	8	negative
month7	7376	2014	Male	2022-12-22	13.1	Layah	[22,35)	2	primary	single	unemployed	soussou	access	access	access	no	no	no	yes	[3,5]	0			0.349699	High SEP	8	negative
month7	7379	2013	Male	2022-12-22	9.6	Layah	[22,35)	2	primary	single	unemployed	soussou	access	access	access	no	no	no	yes	[3,5]	0			0.350073	High SEP	9	negative
month7	7380	2016	Female	2022-12-27	13.2	Sarata	[35,50)	1	primary	married	agriculteur	soussou	access	access	notaccess	no	no	no	no	(5,12]	0			7.12141	High SEP	6	negative
month7	7392	2014	Male	2022-12-27	11	Loumafori	[50,77]	1	no_formal_education	married	unemployed	peulh	notaccess	access	notaccess	yes	yes	no	no	(12,35]	0			-3.06514	Low SEP	8	negative
month8	7001	2015	Male	2023-01-05	15.7	Foulawa	[35,50)	1	secondary	married	fonctionnaire	peulh	notaccess	access	access	no	no	no	yes	(12,35]	0			-2.4773	Low SEP	8	negative
month8	7002	2014	Male	2023-01-12	16.3	Carrefour_Fodéyah	[50,77]	1	secondary	married	fonctionnaire	peulh	access	notaccess	notaccess	yes	yes	no	yes	[3,5]	0			-3.62044	Low SEP	9	negative
month8	7003	2016	Female	2023-01-12	12.9	Carrefour_Fodéyah	[50,77]	1	secondary	married	fonctionnaire	peulh	access	notaccess	notaccess	yes	yes	no	yes	[3,5]	0			-3.62032	Low SEP	7	negative
month8	7011	2015	Female	2023-01-09	11.3	Foulawa	[50,77]	1	secondary	married	unemployed	peulh	notaccess	access	access	yes	yes	no	yes	(5,12]	0			-3.45209	Low SEP	8	negative
month8	7014	2017	Male	2023-01-05	12.2	Foulawa	[50,77]	1	no_formal_education	married	unemployed	peulh	access	access	notaccess	no	no	no	yes	(5,12]	0			-0.420052	Middle SEP	6	negative
month8	7016	2015	Female	2023-01-05	13.4	Foulawa	[50,77]	1	no_formal_education	married	unemployed	peulh	access	access	notaccess	no	no	no	yes	(5,12]	0			-0.419803	Middle SEP	8	negative
month8	7018	2016	Male	2023-01-12	14.4	Carrefour_Fodéyah	[50,77]	1	secondary	married	fonctionnaire	peulh	access	notaccess	notaccess	yes	yes	no	yes	[3,5]	0			-3.61844	Low SEP	7	negative
month8	7020	2017	Male	2023-01-05	11.1	Foulawa	[35,50)	1	secondary	married	fonctionnaire	peulh	notaccess	access	access	yes	no	no	no	(5,12]	0			0.0819717	High SEP	6	negative
month8	7022	2016	Male	2023-01-05	15.6	Foulawa	[50,77]	1	no_formal_education	married	agriculteur	peulh	notaccess	notaccess	notaccess	no	no	no	no	(5,12]	0			7.07676	High SEP	7	negative
month8	7023	2015	Male	2023-01-05	15.3	Foulawa	[35,50)	1	secondary	married	fonctionnaire	peulh	notaccess	access	access	yes	no	no	no	(5,12]	0			0.0823459	High SEP	8	negative
month8	7030	2017	Male	2023-01-06	15	Foulawa	[50,77]	1	secondary	married	fonctionnaire	peulh	access	access	access	no	no	no	no	(5,12]	0			-4.27054	Low SEP	6	negative
month8	7031	2018	Female	2023-01-06	11.7	Carrefour_Fodéyah	[35,50)	2	secondary	married	unemployed	peulh	notaccess	access	access	no	no	no	yes	[3,5]	0			-4.49309	Low SEP	5	negative
month8	7039	2014	Male	2023-01-05	12.3	Hafia	[22,35)	2	secondary	married	commerçant	peulh	notaccess	notaccess	access	yes	yes	no	yes	[3,5]	0			-2.24533	Low SEP	9	negative
month8	7045	2017	Female	2023-01-09	11.2	Layah	[22,35)	2	secondary	single	unemployed	soussou	access	access	access	yes	yes	no	yes	(5,12]	0			0.873211	High SEP	6	negative
month8	7050	2017	Male	2023-01-11	11.7	Layah	[50,77]	2	secondary	married	agriculteur	soussou	notaccess	access	notaccess	yes	yes	yes	yes	(12,35]	0			-1.22201	Middle SEP	6	negative
month8	7053	2018	Male	2023-01-09	12.6	Layah	[50,77]	2	no_formal_education	married	unemployed	soussou	notaccess	access	access	no	no	no	yes	(5,12]	0			-2.88488	Low SEP	5	negative
month8	7066	2014	Female	2023-01-09	11.2	Layah	[35,50)	2	secondary	married	unemployed	soussou	access	access	access	no	no	no	yes	[3,5]	0			-2.08006	Middle SEP	9	negative
month8	7067	2018	Female	2023-01-09	10.1	Layah	[35,50)	2	secondary	married	unemployed	soussou	access	access	access	no	no	no	yes	[3,5]	0			-2.07994	Middle SEP	5	negative
month8	7069	2016	Male	2023-01-09	10.4	Layah	[35,50)	2	no_formal_education	married	unemployed	soussou	notaccess	notaccess	notaccess	no	no	no	yes	(5,12]	6560	40	Pf	-2.01041	Middle SEP	7	positive
month8	7073	2016	Female	2023-01-09	9.8	Layah	[35,50)	2	secondary	married	fonctionnaire	soussou	access	access	notaccess	yes	yes	no	no	(5,12]	0			-1.49039	Middle SEP	7	negative
month8	7074	2017	Female	2023-01-09	10.4	Layah	[35,50)	2	secondary	married	fonctionnaire	soussou	access	access	notaccess	yes	yes	no	no	(5,12]	0			-1.49026	Middle SEP	6	negative
month8	7085	2018	Male	2023-01-11	11	Layah	[35,50)	2	no_formal_education	married	unemployed	soussou	access	access	notaccess	yes	yes	no	no	(5,12]	0			0.643526	High SEP	5	negative
month8	7088	2015	Male	2023-01-09	11.6	Loumafori	[35,50)	2	secondary	married	unemployed	autres	notaccess	access	notaccess	yes	yes	no	no	[3,5]	0			-0.130506	High SEP	8	negative
month8	7089	2015	Male	2023-01-02	9.4	Loumafori	[35,50)	2	secondary	married	unemployed	autres	notaccess	access	notaccess	yes	yes	no	no	[3,5]	0			-0.130382	High SEP	8	negative
month8	7092	2015	Male	2023-01-09	10.9	Olympio	[22,35)	2	secondary	single	unemployed	autres	notaccess	access	access	yes	yes	no	yes	(5,12]	0			-3.96953	Low SEP	8	negative
month8	7099	2015	Female	2023-01-09	12.1	Olympio	[22,35)	2	primary	married	unemployed	autres	access	access	access	yes	yes	no	yes	(5,12]	0			-0.391181	Middle SEP	8	negative
month8	7100	2015	Female	2023-01-09	11	Tanene	[35,50)	2	no_formal_education	married	commerçant	soussou	notaccess	access	notaccess	no	no	no	no	(5,12]	0			7.08649	High SEP	8	negative
month8	7105	2017	Female	2023-01-09	11	Sarata	[22,35)	2	no_formal_education	married	unemployed	soussou	notaccess	notaccess	access	no	no	no	no	(5,12]	0			7.08711	High SEP	6	negative
month8	7110	2017	Female	2023-01-09	12.3	Olympio	[35,50)	2	secondary	married	commerçant	peulh	notaccess	access	notaccess	yes	yes	no	no	(5,12]	0			-1.12813	Middle SEP	6	negative
month8	7111	2014	Male	2023-01-09	13.1	Olympio	[22,35)	2	primary	married	unemployed	peulh	notaccess	access	access	yes	yes	no	yes	[3,5]	0			-2.22748	Low SEP	9	negative
month8	7115	2016	Male	2023-01-09	12.5	Olympio	[35,50)	2	no_formal_education	married	commerçant	peulh	notaccess	notaccess	notaccess	yes	no	no	yes	(5,12]	0			-2.94611	Low SEP	7	negative
month8	7120	2018	Female	2023-01-10	10.2	Tanene	[22,35)	2	no_formal_education	married	unemployed	soussou	notaccess	notaccess	access	yes	yes	no	no	[3,5]	0			-0.993959	Middle SEP	5	negative
month8	7125	2014	Male	2023-01-11	12.6	Olympio	[50,77]	1	secondary	married	agriculteur	soussou	access	access	notaccess	yes	yes	no	no	(12,35]	0			-0.928246	Middle SEP	9	negative
month8	7126	2014	Female	2023-01-11	11.3	Olympio	[50,77]	1	secondary	married	agriculteur	soussou	access	access	notaccess	yes	yes	no	no	(12,35]	0			-0.928121	Middle SEP	9	negative
month8	7127	2014	Female	2023-01-11	12.3	Olympio	[50,77]	1	secondary	married	agriculteur	soussou	access	access	notaccess	yes	yes	no	no	(12,35]	0	88	Pf	-0.927997	Middle SEP	9	negative
month8	7128	2018	Male	2023-01-11	11	Olympio	[50,77]	1	secondary	married	agriculteur	soussou	access	access	notaccess	yes	yes	no	no	(12,35]	0			-0.927872	Middle SEP	5	negative
month8	7129	2017	Male	2023-01-18	15	Loumafori	[50,77]	1	secondary	married	unemployed	soussou	notaccess	notaccess	notaccess	yes	yes	no	yes	(5,12]	0			0.330841	High SEP	6	negative
month8	7132	2017	Male	2023-01-18	12	Loumafori	[50,77]	1	secondary	married	unemployed	soussou	notaccess	notaccess	notaccess	yes	yes	no	yes	(5,12]	0			0.331216	High SEP	6	negative
month8	7137	2014	Male	2023-01-19	22.7	Hafia	[22,35)	2	secondary	married	unemployed	autres	notaccess	access	access	yes	yes	no	yes	(5,12]	0			-2.60437	Low SEP	9	negative
month8	7138	2015	Male	2023-01-18	13	Loumafori	[50,77]	1	no_formal_education	married	agriculteur	soussou	access	access	notaccess	yes	yes	no	yes	(5,12]	0			-2.92151	Low SEP	8	negative
month8	7143	2015	Female	2023-01-18	10.3	Loumafori	[50,77]	1	no_formal_education	married	agriculteur	soussou	access	access	notaccess	yes	yes	no	yes	(5,12]	0			-2.92088	Low SEP	8	negative
month8	7144	2017	Male	2023-01-20	12.2	Loumafori	[50,77]	1	no_formal_education	married	unemployed	peulh	notaccess	access	notaccess	yes	no	no	yes	(5,12]	48000	0	Pf	-0.880953	Middle SEP	6	positive
month8	7146	2015	Female	2023-01-19	15	Hafia	[22,35)	2	secondary	married	unemployed	autres	notaccess	access	access	yes	yes	no	yes	(5,12]	0			-2.60325	Low SEP	8	negative
month8	7149	2015	Female	2023-01-18	11.9	Loumafori	[50,77]	1	secondary	married	unemployed	autres	access	access	access	yes	yes	no	yes	(12,35]	0			-2.5215	Low SEP	8	negative
month8	7153	2016	Male	2023-01-18	11.8	Loumafori	[50,77]	1	secondary	married	unemployed	peulh	access	access	notaccess	yes	yes	no	yes	(12,35]	0			-3.47306	Low SEP	7	negative
month8	7163	2016	Female	2023-01-19	12	Hafia	[22,35)	2	secondary	married	fonctionnaire	peulh	notaccess	notaccess	notaccess	no	no	no	no	(5,12]	0			-1.86619	Middle SEP	7	negative
month8	7167	2018	Male	2023-01-18	12.8	Loumafori	[50,77]	1	secondary	married	unemployed	soussou	access	access	access	yes	yes	no	yes	(5,12]	0			-0.429278	Middle SEP	5	negative
month8	7168	2016	Male	2023-01-18	14.6	Loumafori	[50,77]	1	secondary	married	unemployed	soussou	access	access	access	yes	yes	no	yes	(5,12]	0			-0.429153	Middle SEP	7	negative
month8	7171	2014	Male	2023-01-16	12.3	Carrefour_Fodéyah	[22,35)	1	secondary	married	unemployed	soussou	notaccess	access	access	no	no	no	no	(5,12]	0			7.09534	High SEP	9	negative
month8	7172	2017	Female	2023-01-16	10.3	Carrefour_Fodéyah	[22,35)	1	secondary	married	unemployed	soussou	notaccess	access	access	yes	yes	no	yes	(5,12]	0			-1.72674	Middle SEP	6	negative
month8	7173	2014	Male	2023-01-16	13.2	Carrefour_Fodéyah	[22,35)	1	secondary	married	unemployed	soussou	notaccess	access	access	yes	yes	no	yes	(5,12]	0			-1.72661	Middle SEP	9	negative
month8	7175	2018	Female	2023-01-16	11.4	Carrefour_Fodéyah	[50,77]	1	secondary	married	fonctionnaire	peulh	access	notaccess	notaccess	yes	no	no	yes	(12,35]	0			-3.08041	Low SEP	5	negative
month8	7184	2016	Female	2023-01-16	10.6	Carrefour_Fodéyah	[50,77]	2	secondary	single	unemployed	peulh	access	access	access	yes	yes	no	yes	(5,12]	0			-2.77997	Low SEP	7	negative
month8	7185	2018	Male	2023-01-16	13	Carrefour_Fodéyah	[22,35)	1	secondary	married	unemployed	soussou	notaccess	access	access	no	no	no	no	(5,12]	0			7.09709	High SEP	5	negative
month8	7188	2017	Male	2023-01-16	10.7	Carrefour_Fodéyah	[22,35)	1	secondary	married	unemployed	soussou	notaccess	access	access	no	no	no	no	(5,12]	0			7.09746	High SEP	6	negative
month8	7189	2017	Male	2023-01-16	13.8	Carrefour_Fodéyah	[50,77]	1	secondary	married	fonctionnaire	peulh	access	notaccess	notaccess	yes	yes	no	yes	(5,12]	0			-0.320337	Middle SEP	6	negative
month8	7191	2016	Female	2023-01-16	12.1	Carrefour_Fodéyah	[50,77]	1	secondary	married	fonctionnaire	peulh	access	notaccess	notaccess	yes	yes	no	yes	(5,12]	0			-0.320087	Middle SEP	7	negative
month8	7203	2015	Female	2023-01-20	13.9	Foulawa	[50,77]	1	secondary	married	fonctionnaire	peulh	access	access	notaccess	yes	yes	no	yes	[3,5]	0			-2.40805	Low SEP	8	negative
month8	7208	2016	Male	2023-01-16	11.3	Carrefour_Fodéyah	[50,77]	1	secondary	married	fonctionnaire	peulh	access	notaccess	notaccess	no	no	no	no	(5,12]	0			7.09996	High SEP	7	negative
month8	7213	2016	Male	2023-01-12	13	Olympio	[50,77]	1	secondary	married	agriculteur	soussou	access	access	notaccess	yes	yes	no	no	(12,35]	0			-1.31489	Middle SEP	7	negative
month8	7218	2015	Male	2023-01-12	13.1	Tanene	[35,50)	2	no_formal_education	married	commerçant	soussou	notaccess	access	notaccess	yes	yes	no	no	(5,12]	0			0.215399	High SEP	8	negative
month8	7221	2015	Female	2023-01-12	12.6	Tanene	[35,50)	2	no_formal_education	married	commerçant	soussou	notaccess	access	notaccess	yes	yes	no	no	(5,12]	0			0.215773	High SEP	8	negative
month8	7222	2018	Female	2023-01-13	9.6	Olympio	[50,77]	1	secondary	married	agriculteur	soussou	access	access	notaccess	yes	yes	no	yes	(5,12]	0			-2.90403	Low SEP	5	negative
month8	7230	2017	Female	2023-01-12	13.16	Olympio	[50,77]	1	secondary	married	agriculteur	soussou	access	access	notaccess	yes	yes	no	yes	(5,12]	4520	142	Pf +Gf	-2.90303	Low SEP	6	positive
month8	7237	2014	Female	2023-01-12	11.7	Tanene	[22,35)	2	no_formal_education	married	commerçant	soussou	notaccess	access	notaccess	yes	yes	no	no	(12,35]	0			-2.11031	Middle SEP	9	negative
month8	7242	2014	Female	2023-01-13	10.6	Sarata	[35,50)	2	no_formal_education	single	commerçant	soussou	notaccess	notaccess	notaccess	no	no	no	no	(5,12]	0			7.1042	High SEP	9	negative
month8	7245	2018	Female	2023-01-12	11.5	Tanene	[22,35)	2	no_formal_education	married	unemployed	soussou	notaccess	notaccess	access	yes	yes	yes	yes	[3,5]	0			-1.55354	Middle SEP	5	negative
month8	7248	2014	Male	2023-01-12	8.9	Tanene	[22,35)	2	no_formal_education	married	unemployed	soussou	access	access	access	yes	yes	no	yes	(5,12]	0			0.0415063	High SEP	9	negative
month8	7249	2017	Male	2023-01-12	10.9	Tanene	[22,35)	2	no_formal_education	married	unemployed	soussou	access	access	access	yes	yes	no	yes	(5,12]	0			0.041631	High SEP	6	negative
month8	7250	2018	Male	2023-01-13	12.6	Tanene	[22,35)	2	primary	married	unemployed	soussou	access	access	notaccess	no	no	no	yes	[3,5]	0			-1.81799	Middle SEP	5	negative
month8	7252	2014	Male	2023-01-13	9.1	Tanene	[22,35)	2	primary	married	unemployed	soussou	access	access	notaccess	no	no	no	yes	[3,5]	0			-1.81775	Middle SEP	9	negative
month8	7261	2018	Male	2023-01-05	10.8	Layah	[22,35)	2	no_formal_education	married	unemployed	peulh	notaccess	notaccess	access	no	no	no	yes	[3,5]	1824	0	Pf	0.516335	High SEP	5	positive
month8	7267	2014	Female	2023-01-06	10.9	Kimara	[35,50)	1	primary	married	unemployed	autres	notaccess	access	notaccess	yes	yes	no	yes	[3,5]	0			0.0284963	High SEP	9	negative
month8	7269	2016	Female	2023-01-06	15.6	Olympio	[22,35)	2	primary	married	unemployed	peulh	notaccess	access	access	yes	yes	no	yes	[3,5]	0			1.0307	High SEP	7	negative
month8	7270	2017	Female	2023-01-05	12.6	Olympio	[22,35)	2	primary	married	unemployed	peulh	notaccess	access	access	yes	yes	no	yes	[3,5]	0			1.03083	High SEP	6	negative
month8	7278	2015	Male	2023-01-16	11.4	Sarata	[50,77]	1	no_formal_education	married	agriculteur	soussou	notaccess	notaccess	notaccess	yes	yes	no	yes	[3,5]	0			-1.5733	Middle SEP	8	negative
month8	7279	2018	Female	2023-01-16	13	Sarata	[50,77]	1	no_formal_education	married	agriculteur	soussou	notaccess	notaccess	notaccess	yes	yes	no	yes	[3,5]	0			-1.57318	Middle SEP	5	negative
month8	7281	2018	Female	2023-01-16	13.1	Sarata	[35,50)	2	secondary	single	commerçant	soussou	notaccess	notaccess	notaccess	yes	yes	no	yes	(12,35]	0			-0.579929	Middle SEP	5	negative
month8	7294	2018	Female	2023-01-16	12.3	Foulawa	[35,50)	1	no_formal_education	married	commerçant	peulh	notaccess	access	notaccess	no	no	no	no	(5,12]	0			7.11069	High SEP	5	negative
month8	7296	2017	Male	2023-01-16	10.9	Sarata	[35,50)	1	no_formal_education	married	commerçant	soussou	notaccess	notaccess	notaccess	no	no	no	no	(5,12]	0			7.11093	High SEP	6	negative
month8	7300	2018	Male	2023-01-17	13.3	Sarata	[50,77]	1	secondary	married	unemployed	soussou	access	access	access	yes	yes	no	no	(12,35]	0			-0.937562	Middle SEP	5	negative
month8	7302	2017	Male	2023-01-17	14	Sarata	[50,77]	1	secondary	married	unemployed	soussou	access	access	access	yes	yes	no	no	(12,35]	0			-0.937312	Middle SEP	6	negative
month8	7305	2015	Male	2023-01-18	12.6	Foulawa	[35,50)	1	secondary	married	fonctionnaire	peulh	notaccess	access	access	no	no	no	no	(5,12]	0			7.11206	High SEP	8	negative
month8	7320	2015	Male	2023-01-16	11.8	Sarata	[35,50)	1	secondary	married	unemployed	peulh	access	access	access	yes	yes	yes	yes	[3,5]	0			-1.11028	Middle SEP	8	negative
month8	7326	2014	Male	2023-01-09	12.5	Layah	[35,50)	2	no_formal_education	married	commerçant	soussou	notaccess	notaccess	notaccess	no	no	no	no	(5,12]	0			7.11468	High SEP	9	negative
month8	7329	2017	Male	2023-01-11	13.8	Maire_daouda	[35,50)	1	secondary	married	fonctionnaire	soussou	access	notaccess	access	no	no	no	no	(5,12]	0			0.193145	High SEP	6	negative
month8	7331	2015	Female	2023-01-11	11.14	Maire_daouda	[35,50)	1	secondary	married	fonctionnaire	soussou	access	notaccess	access	no	no	no	no	(5,12]	0			0.193394	High SEP	8	negative
month8	7332	2015	Female	2023-01-11	10.9	Maire_daouda	[35,50)	1	secondary	married	fonctionnaire	soussou	access	notaccess	access	no	no	no	no	(5,12]	0			0.193519	High SEP	8	negative
month8	7335	2017	Male	2023-01-06	9.4	Kimara	[50,77]	1	secondary	married	unemployed	soussou	access	access	notaccess	yes	yes	no	yes	(12,35]	0			-2.47501	Low SEP	6	negative
month8	7342	2018	Male	2023-01-19	12.4	Hafia	[22,35)	2	primary	married	commerçant	soussou	access	access	notaccess	yes	yes	no	no	(5,12]	0			-2.44842	Low SEP	5	negative
month8	7345	2015	Male	2023-01-11	13.3	Layah	[35,50)	2	no_formal_education	married	commerçant	soussou	notaccess	notaccess	notaccess	yes	yes	no	yes	[3,5]	0			-0.666386	Middle SEP	8	negative
month8	7348	2016	Female	2023-01-11	11.8	Layah	[35,50)	2	no_formal_education	married	commerçant	soussou	notaccess	notaccess	notaccess	no	no	no	no	(5,12]	0			7.11742	High SEP	7	negative
month8	7351	2015	Male	2023-01-13	14	Layah	[22,35)	2	primary	married	unemployed	soussou	access	access	access	no	no	no	no	(5,12]	0			7.1178	High SEP	8	negative
month8	7355	2016	Male	2023-01-13	10.9	Layah	[50,77]	2	secondary	married	unemployed	soussou	access	access	notaccess	yes	yes	no	no	(5,12]	0			-1.9496	Middle SEP	7	negative
month8	7373	2014	Male	2023-01-19	9.9	Hafia	[35,50)	2	no_formal_education	married	commerçant	peulh	access	access	access	no	no	no	no	(5,12]	0			-3.27197	Low SEP	9	negative
month8	7376	2014	Male	2023-01-10	13.2	Layah	[22,35)	2	primary	single	unemployed	soussou	access	access	access	no	no	no	yes	[3,5]	0			0.349699	High SEP	9	negative
month8	7377	2018	Male	2023-01-09	12.6	Layah	[22,35)	2	primary	single	unemployed	soussou	access	access	access	no	no	no	yes	[3,5]	0			0.349824	High SEP	5	negative
month8	7380	2016	Female	2023-01-18	15.6	Sarata	[35,50)	1	no_formal_education	married	commerçant	soussou	notaccess	notaccess	notaccess	no	no	no	no	(5,12]	0			7.12141	High SEP	7	negative
month8	7392	2014	Male	2023-01-18	12.7	Loumafori	[50,77]	1	no_formal_education	married	unemployed	peulh	notaccess	access	notaccess	yes	yes	no	no	(12,35]	134	0	Pm	-3.06514	Low SEP	9	positive
month9	7005	2017	Female	2023-02-13	14.1	Foulawa	[35,50)	1	secondary	married	commerçant	peulh	access	access	notaccess	yes	yes	no	yes	(5,12]	0			-1.44814	Middle SEP	6	negative
month9	7008	2016	Female	2023-02-14	13.8	Foulawa	[50,77]	1	secondary	married	unemployed	peulh	notaccess	access	access	yes	yes	no	yes	(5,12]	0			-3.45246	Low SEP	7	negative
month9	7010	2015	Male	2023-02-14	13.6	Foulawa	[50,77]	1	secondary	married	unemployed	peulh	notaccess	access	access	yes	yes	no	yes	(5,12]	0			-3.45221	Low SEP	8	negative
month9	7011	2015	Female	2023-02-14	11	Foulawa	[50,77]	1	secondary	married	unemployed	peulh	notaccess	access	access	yes	yes	no	yes	(5,12]	0			-3.45209	Low SEP	8	negative
month9	7020	2017	Male	2023-02-13	11.8	Foulawa	[35,50)	1	secondary	married	fonctionnaire	peulh	notaccess	access	access	yes	no	no	no	(5,12]	0			0.0819717	High SEP	6	negative
month9	7024	2017	Female	2023-02-13	10.8	Foulawa	[50,77]	1	no_formal_education	married	agriculteur	peulh	notaccess	notaccess	notaccess	no	no	no	no	(5,12]	0			7.07701	High SEP	6	negative
month9	7026	2014	Male	2023-02-13	11.8	Foulawa	[50,77]	1	no_formal_education	married	agriculteur	peulh	notaccess	notaccess	notaccess	no	no	no	no	(5,12]	0			7.07725	High SEP	9	negative
month9	7028	2016	Female	2023-02-15	12	Foulawa	[50,77]	1	secondary	married	fonctionnaire	peulh	access	access	access	no	no	no	no	(5,12]	0			-4.27079	Low SEP	7	negative
month9	7042	2014	Female	2023-02-15	12.7	Foulawa	[50,77]	1	secondary	married	fonctionnaire	peulh	access	access	access	no	no	no	no	(5,12]	0			-4.26904	Low SEP	9	negative
month9	7043	2016	Male	2023-02-23	13.1	Layah	[22,35)	2	secondary	single	unemployed	soussou	access	access	access	yes	yes	no	yes	(5,12]	0			0.872961	High SEP	7	negative
month9	7045	2017	Female	2023-02-23	12.3	Layah	[22,35)	2	secondary	single	unemployed	soussou	access	access	access	yes	yes	no	yes	(5,12]	0			0.873211	High SEP	6	negative
month9	7050	2017	Male	2023-02-23	10	Layah	[50,77]	2	secondary	married	agriculteur	soussou	notaccess	access	notaccess	yes	yes	yes	yes	(12,35]	0			-1.22201	Middle SEP	6	negative
month9	7053	2018	Male	2023-02-23	11.7	Layah	[50,77]	2	no_formal_education	married	unemployed	soussou	notaccess	access	access	no	no	no	yes	(5,12]	0			-2.88488	Low SEP	5	negative
month9	7066	2014	Female	2023-02-23	10	Layah	[35,50)	2	secondary	married	unemployed	soussou	access	access	access	no	no	no	yes	[3,5]	0			-2.08006	Middle SEP	9	negative
month9	7067	2018	Female	2023-02-23	10.2	Layah	[35,50)	2	secondary	married	unemployed	soussou	access	access	access	no	no	no	yes	[3,5]	0			-2.07994	Middle SEP	5	negative
month9	7069	2016	Male	2023-02-23	13.2	Layah	[35,50)	2	no_formal_education	married	unemployed	soussou	notaccess	notaccess	notaccess	no	no	no	yes	(5,12]	0			-2.01041	Middle SEP	7	negative
month9	7073	2016	Female	2023-02-23	11.7	Layah	[35,50)	2	secondary	married	fonctionnaire	soussou	access	access	notaccess	yes	yes	no	no	(5,12]	0			-1.49039	Middle SEP	7	negative
month9	7074	2017	Female	2023-02-23	13.2	Layah	[35,50)	2	secondary	married	fonctionnaire	soussou	access	access	notaccess	yes	yes	no	no	(5,12]	0			-1.49026	Middle SEP	6	negative
month9	7085	2018	Male	2023-02-24	11.8	Layah	[35,50)	2	no_formal_education	married	unemployed	soussou	access	access	notaccess	yes	yes	no	no	(5,12]	0			0.643526	High SEP	5	negative
month9	7088	2015	Male	2023-02-15	12.2	Loumafori	[35,50)	2	secondary	married	unemployed	autres	notaccess	access	notaccess	yes	yes	no	no	[3,5]	0			-0.130506	High SEP	8	negative
month9	7089	2015	Male	2023-02-15	8.3	Loumafori	[35,50)	2	secondary	married	unemployed	autres	notaccess	access	notaccess	yes	yes	no	no	[3,5]	0			-0.130382	High SEP	8	negative
month9	7092	2015	Male	2023-02-15	13	Olympio	[22,35)	2	secondary	single	unemployed	autres	notaccess	access	access	yes	yes	no	yes	(5,12]	0			-3.96953	Low SEP	8	negative
month9	7099	2015	Female	2023-02-15	11.8	Olympio	[22,35)	2	primary	married	unemployed	autres	access	access	access	yes	yes	no	yes	(5,12]	0			-0.391181	Middle SEP	8	negative
month9	7100	2015	Female	2023-02-15	12	Tanene	[35,50)	2	no_formal_education	married	commerçant	soussou	notaccess	access	notaccess	no	no	no	no	(5,12]	0			7.08649	High SEP	8	negative
month9	7105	2017	Female	2023-02-15	11.7	Sarata	[22,35)	2	no_formal_education	married	unemployed	soussou	notaccess	notaccess	access	no	no	no	no	(5,12]	0			7.08711	High SEP	6	negative
month9	7110	2017	Female	2023-02-15	11.5	Olympio	[35,50)	2	secondary	married	commerçant	peulh	notaccess	access	notaccess	yes	yes	no	no	(5,12]	0			-1.12813	Middle SEP	6	negative
month9	7111	2014	Male	2023-02-15	11.2	Olympio	[22,35)	2	primary	married	unemployed	peulh	notaccess	access	access	yes	yes	no	yes	[3,5]	0			-2.22748	Low SEP	9	negative
month9	7115	2016	Male	2023-02-15	12.6	Olympio	[35,50)	2	no_formal_education	married	commerçant	peulh	notaccess	notaccess	notaccess	yes	no	no	yes	(5,12]	0			-2.94611	Low SEP	7	negative
month9	7120	2018	Female	2023-02-15	9.5	Tanene	[22,35)	2	no_formal_education	married	unemployed	soussou	notaccess	notaccess	access	yes	yes	no	no	[3,5]	0			-0.993959	Middle SEP	5	negative
month9	7125	2014	Male	2023-02-16	12.7	Olympio	[50,77]	1	secondary	married	agriculteur	soussou	access	access	notaccess	yes	yes	no	no	(12,35]	0			-0.928246	Middle SEP	9	negative
month9	7126	2014	Female	2023-02-16	11.9	Olympio	[50,77]	1	secondary	married	agriculteur	soussou	access	access	notaccess	yes	yes	no	no	(12,35]	0			-0.928121	Middle SEP	9	negative
month9	7127	2014	Female	2023-02-16	11.4	Olympio	[50,77]	1	secondary	married	agriculteur	soussou	access	access	notaccess	yes	yes	no	no	(12,35]	4480	0	Pf	-0.927997	Middle SEP	9	positive
month9	7128	2018	Male	2023-02-16	10.8	Olympio	[50,77]	1	secondary	married	agriculteur	soussou	access	access	notaccess	yes	yes	no	no	(12,35]	0			-0.927872	Middle SEP	5	negative
month9	7129	2017	Male	2023-02-22	14.3	Loumafori	[50,77]	1	secondary	married	unemployed	soussou	notaccess	notaccess	notaccess	yes	yes	no	yes	(5,12]	0			0.330841	High SEP	6	negative
month9	7132	2017	Male	2023-02-22	11	Loumafori	[50,77]	1	secondary	married	unemployed	soussou	notaccess	notaccess	notaccess	yes	yes	no	yes	(5,12]	0			0.331216	High SEP	6	negative
month9	7137	2014	Male	2023-02-24	22	Hafia	[22,35)	2	secondary	married	unemployed	autres	notaccess	access	access	yes	yes	no	yes	(5,12]	0			-2.60437	Low SEP	9	negative
month9	7138	2015	Male	2023-02-22	13	Loumafori	[50,77]	1	no_formal_education	married	agriculteur	soussou	access	access	notaccess	yes	yes	no	yes	(5,12]	0			-2.92151	Low SEP	8	negative
month9	7143	2015	Female	2023-02-22	13	Loumafori	[50,77]	1	no_formal_education	married	agriculteur	soussou	access	access	notaccess	yes	yes	no	yes	(5,12]	0			-2.92088	Low SEP	8	negative
month9	7146	2015	Female	2023-02-24	13.8	Hafia	[22,35)	2	secondary	married	unemployed	autres	notaccess	access	access	yes	yes	no	yes	(5,12]	0			-2.60325	Low SEP	8	negative
month9	7149	2015	Female	2023-02-22	12.9	Loumafori	[50,77]	1	secondary	married	unemployed	autres	access	access	access	yes	yes	no	yes	(12,35]	0			-2.5215	Low SEP	8	negative
month9	7153	2016	Male	2023-02-22	11.7	Loumafori	[50,77]	1	secondary	married	unemployed	peulh	access	access	notaccess	yes	yes	no	yes	(12,35]	0			-3.47306	Low SEP	7	negative
month9	7163	2016	Female	2023-02-24	10.3	Hafia	[22,35)	2	secondary	married	fonctionnaire	peulh	notaccess	notaccess	notaccess	no	no	no	no	(5,12]	0			-1.86619	Middle SEP	7	negative
month9	7167	2018	Male	2023-02-22	12	Loumafori	[50,77]	1	secondary	married	unemployed	soussou	access	access	access	yes	yes	no	yes	(5,12]	0			-0.429278	Middle SEP	5	negative
month9	7168	2016	Male	2023-02-22	14.7	Loumafori	[50,77]	1	secondary	married	unemployed	soussou	access	access	access	yes	yes	no	yes	(5,12]	0			-0.429153	Middle SEP	7	negative
month9	7171	2014	Male	2023-02-22	12.7	Carrefour_Fodéyah	[22,35)	1	secondary	married	unemployed	soussou	notaccess	access	access	no	no	no	no	(5,12]	0			7.09534	High SEP	9	negative
month9	7172	2017	Female	2023-02-22	11.5	Carrefour_Fodéyah	[22,35)	1	secondary	married	unemployed	soussou	notaccess	access	access	yes	yes	no	yes	(5,12]	0			-1.72674	Middle SEP	6	negative
month9	7173	2014	Male	2023-02-22	11	Carrefour_Fodéyah	[22,35)	1	secondary	married	unemployed	soussou	notaccess	access	access	yes	yes	no	yes	(5,12]	0			-1.72661	Middle SEP	9	negative
month9	7175	2018	Female	2023-02-22	11.5	Carrefour_Fodéyah	[50,77]	1	secondary	married	fonctionnaire	peulh	access	notaccess	notaccess	yes	no	no	yes	(12,35]	0			-3.08041	Low SEP	5	negative
month9	7184	2016	Female	2023-02-21	13.9	Carrefour_Fodéyah	[50,77]	2	secondary	single	unemployed	peulh	access	access	access	yes	yes	no	yes	(5,12]	0			-2.77997	Low SEP	7	negative
month9	7185	2018	Male	2023-02-22	10.9	Carrefour_Fodéyah	[22,35)	1	secondary	married	unemployed	soussou	notaccess	access	access	no	no	no	no	(5,12]	0			7.09709	High SEP	5	negative
month9	7188	2017	Male	2023-02-22	13	Carrefour_Fodéyah	[22,35)	1	secondary	married	unemployed	soussou	notaccess	access	access	no	no	no	no	(5,12]	0			7.09746	High SEP	6	negative
month9	7189	2017	Male	2023-02-21	13.2	Carrefour_Fodéyah	[50,77]	1	secondary	married	fonctionnaire	peulh	access	notaccess	notaccess	yes	yes	no	yes	(5,12]	0			-0.320337	Middle SEP	6	negative
month9	7191	2016	Female	2023-02-21	11	Carrefour_Fodéyah	[50,77]	1	secondary	married	fonctionnaire	peulh	access	notaccess	notaccess	yes	yes	no	yes	(5,12]	0			-0.320087	Middle SEP	7	negative
month9	7203	2015	Female	2023-02-22	13.9	Foulawa	[50,77]	1	secondary	married	fonctionnaire	peulh	access	access	notaccess	yes	yes	no	yes	[3,5]	0			-2.40805	Low SEP	8	negative
month9	7208	2016	Male	2023-02-21	11.1	Carrefour_Fodéyah	[50,77]	1	secondary	married	fonctionnaire	peulh	access	notaccess	notaccess	no	no	no	no	(5,12]	0			7.09996	High SEP	7	negative
month9	7213	2016	Male	2023-02-16	13.3	Olympio	[50,77]	1	secondary	married	agriculteur	soussou	access	access	notaccess	yes	yes	no	no	(12,35]	0			-1.31489	Middle SEP	7	negative
month9	7218	2015	Male	2023-02-16	13.1	Tanene	[35,50)	2	no_formal_education	married	commerçant	soussou	notaccess	access	notaccess	yes	yes	no	no	(5,12]	0			0.215399	High SEP	8	negative
month9	7221	2015	Female	2023-02-16	10.3	Tanene	[35,50)	2	no_formal_education	married	commerçant	soussou	notaccess	access	notaccess	yes	yes	no	no	(5,12]	0			0.215773	High SEP	8	negative
month9	7222	2018	Female	2023-02-17	10.7	Olympio	[50,77]	1	secondary	married	agriculteur	soussou	access	access	notaccess	yes	yes	no	yes	(5,12]	0			-2.90403	Low SEP	5	negative
month9	7230	2017	Female	2023-02-16	8.6	Olympio	[50,77]	1	secondary	married	agriculteur	soussou	access	access	notaccess	yes	yes	no	yes	(5,12]	0			-2.90303	Low SEP	6	negative
month9	7237	2014	Female	2023-02-16	12.3	Tanene	[22,35)	2	no_formal_education	married	commerçant	soussou	notaccess	access	notaccess	yes	yes	no	no	(12,35]	0			-2.11031	Middle SEP	9	negative
month9	7243	2018	Male	2023-02-17	16.1	Tanene	[22,35)	2	no_formal_education	married	unemployed	soussou	notaccess	notaccess	access	yes	yes	yes	yes	[3,5]	0			-1.55379	Middle SEP	5	negative
month9	7245	2018	Female	2023-02-17	13	Tanene	[22,35)	2	no_formal_education	married	unemployed	soussou	notaccess	notaccess	access	yes	yes	yes	yes	[3,5]	0			-1.55354	Middle SEP	5	negative
month9	7248	2014	Male	2023-02-16	11.5	Tanene	[22,35)	2	no_formal_education	married	unemployed	soussou	access	access	access	yes	yes	no	yes	(5,12]	0			0.0415063	High SEP	9	negative
month9	7249	2017	Male	2023-02-16	12.7	Tanene	[22,35)	2	no_formal_education	married	unemployed	soussou	access	access	access	yes	yes	no	yes	(5,12]	0			0.041631	High SEP	6	negative
month9	7250	2018	Male	2023-02-16	11.2	Tanene	[22,35)	2	primary	married	unemployed	soussou	access	access	notaccess	no	no	no	yes	[3,5]	0			-1.81799	Middle SEP	5	negative
month9	7252	2014	Male	2023-02-16	10.5	Tanene	[22,35)	2	primary	married	unemployed	soussou	access	access	notaccess	no	no	no	yes	[3,5]	0			-1.81775	Middle SEP	9	negative
month9	7261	2018	Male	2023-02-14	9.3	Layah	[22,35)	2	no_formal_education	married	unemployed	peulh	notaccess	notaccess	access	no	no	no	yes	[3,5]	0			0.516335	High SEP	5	negative
month9	7267	2014	Female	2023-02-14	11.7	Kimara	[35,50)	1	primary	married	unemployed	autres	notaccess	access	notaccess	yes	yes	no	yes	[3,5]	0			0.0284963	High SEP	9	negative
month9	7269	2016	Female	2023-02-13	14.5	Olympio	[22,35)	2	primary	married	unemployed	peulh	notaccess	access	access	yes	yes	no	yes	[3,5]	0			1.0307	High SEP	7	negative
month9	7270	2017	Female	2023-02-13	13.8	Olympio	[22,35)	2	primary	married	unemployed	peulh	notaccess	access	access	yes	yes	no	yes	[3,5]	0			1.03083	High SEP	6	negative
month9	7278	2015	Male	2023-02-20	11.8	Sarata	[50,77]	1	no_formal_education	married	agriculteur	soussou	notaccess	notaccess	notaccess	yes	yes	no	yes	[3,5]	0			-1.5733	Middle SEP	8	negative
month9	7279	2018	Female	2023-02-20	11.9	Sarata	[50,77]	1	no_formal_education	married	agriculteur	soussou	notaccess	notaccess	notaccess	yes	yes	no	yes	[3,5]	0			-1.57318	Middle SEP	5	negative
month9	7281	2018	Female	2023-02-20	12.6	Sarata	[35,50)	2	secondary	single	commerçant	soussou	notaccess	notaccess	notaccess	yes	yes	no	yes	(12,35]	0			-0.579929	Middle SEP	5	negative
month9	7294	2018	Female	2023-02-20	11.4	Sarata	[35,50)	1	no_formal_education	married	commerçant	soussou	notaccess	notaccess	notaccess	no	no	no	no	(5,12]	0			7.11069	High SEP	5	negative
month9	7296	2017	Male	2023-02-20	13.4	Sarata	[35,50)	1	no_formal_education	married	commerçant	soussou	notaccess	notaccess	notaccess	no	no	no	no	(5,12]	0			7.11093	High SEP	6	negative
month9	7300	2018	Male	2023-02-20	13.5	Sarata	[50,77]	1	secondary	married	unemployed	soussou	access	access	access	yes	yes	no	no	(12,35]	0			-0.937562	Middle SEP	5	negative
month9	7302	2017	Male	2023-02-20	14.3	Sarata	[50,77]	1	secondary	married	unemployed	soussou	access	access	access	yes	yes	no	no	(12,35]	0			-0.937312	Middle SEP	6	negative
month9	7305	2015	Male	2023-02-22	12.4	Foulawa	[35,50)	1	secondary	married	fonctionnaire	peulh	notaccess	access	access	no	no	no	no	(5,12]	120	0	Pf	7.11206	High SEP	8	positive
month9	7320	2015	Male	2023-02-20	12.2	Sarata	[35,50)	1	secondary	married	unemployed	peulh	access	access	access	yes	yes	yes	yes	[3,5]	0			-1.11028	Middle SEP	8	negative
month9	7326	2014	Male	2023-02-24	12.4	Layah	[35,50)	2	no_formal_education	married	commerçant	soussou	notaccess	notaccess	notaccess	no	no	no	no	(5,12]	0			7.11468	High SEP	9	negative
month9	7329	2017	Male	2023-02-16	12.7	Maire_daouda	[35,50)	1	secondary	married	fonctionnaire	soussou	access	notaccess	access	no	no	no	no	(5,12]	0			0.193145	High SEP	6	negative
month9	7331	2015	Female	2023-02-16	13.2	Maire_daouda	[35,50)	1	secondary	married	fonctionnaire	soussou	access	notaccess	access	no	no	no	no	(5,12]	0			0.193394	High SEP	8	negative
month9	7332	2015	Female	2023-02-16	11.4	Maire_daouda	[35,50)	1	secondary	married	fonctionnaire	soussou	access	notaccess	access	no	no	no	no	(5,12]	0			0.193519	High SEP	8	negative
month9	7342	2018	Male	2023-02-24	13.5	Hafia	[22,35)	2	primary	married	commerçant	soussou	access	access	notaccess	yes	yes	no	no	(5,12]	0			-2.44842	Low SEP	5	negative
month9	7345	2015	Male	2023-02-24	12.6	Layah	[35,50)	2	no_formal_education	married	commerçant	soussou	notaccess	notaccess	notaccess	yes	yes	no	yes	[3,5]	0			-0.666386	Middle SEP	8	negative
month9	7348	2016	Female	2023-02-24	11.4	Layah	[35,50)	2	no_formal_education	married	commerçant	soussou	notaccess	notaccess	notaccess	no	no	no	no	(5,12]	0			7.11742	High SEP	7	negative
month9	7351	2015	Male	2023-02-23	13.3	Layah	[22,35)	2	primary	married	unemployed	soussou	access	access	access	no	no	no	no	(5,12]	0			7.1178	High SEP	8	negative
month9	7373	2014	Male	2023-02-24	12.8	Hafia	[35,50)	2	no_formal_education	married	commerçant	peulh	access	access	access	no	no	no	no	(5,12]	0			-3.27197	Low SEP	9	negative
month9	7376	2014	Male	2023-02-23	11.9	Layah	[22,35)	2	primary	single	unemployed	soussou	access	access	access	no	no	no	yes	[3,5]	0			0.349699	High SEP	9	negative
month9	7377	2018	Male	2023-02-23	11	Layah	[22,35)	2	primary	single	unemployed	soussou	access	access	access	no	no	no	yes	[3,5]	0			0.349824	High SEP	5	negative
month9	7380	2016	Female	2023-02-22	12.5	Olympio	[35,50)	1	primary	married	agriculteur	soussou	access	access	notaccess	no	no	no	no	(5,12]	0			7.12141	High SEP	7	negative
month9	7392	2014	Male	2023-02-22	11.5	Loumafori	[50,77]	1	no_formal_education	married	unemployed	peulh	notaccess	access	notaccess	yes	yes	no	no	(12,35]	0			-3.06514	Low SEP	9	negative

## Sheet: Dictionnary
Inequity in the use of Insecticide-Treated Nets among Children and Adolescents in Rural Guinea: A cohort study in rural Guinea. Almamy Amara TOURE1,2,4, Sidikiba SIDIBE2, Aboubacar Sidiki MAGASSOUBA2, Abdoul Habib BEAVOGUI3, Abdoulaye Fodé TOURE1, Amadou Wann1, Mohamed Prince KABA1, Alexandre DELAMOU2,5, Seni KOUANDA1,7. 1.Institut Africain de Santé Publique (IASP/USTA) of the University Saint Th…
Visit_Number	round number
Birth_Year	Birth year of participant
Visit_Date	Date of visit
Gender	participant gender
hemoglobin	hemoglobin
residence	Place of living
Head_age	Head of household age
Head_gender	Head of household gender	1=Man; 2=Woman
Head_education	Head of household education
Head_marital_status	Head of household marital status
Head_occupation	Head of household occupation
Head_ethnic	Head of household ethnic
Head_radio	Head of household access to radio
Head_tv	Head of household access to tv
Head_internet	Head of household access to internet
access_itn	Household access to ITN
use_itn	Household use of ITN
travel_child	Has the child travelled from the study site?
mosquito_repellent_use	Use of mosquito repellent
hh_num	Household size (numberof people in the household)
PARASITEMIE	Parasitemia (density)
Gametocytemie	Gametocytemia
Especes	species
index_wealth_quint	socieeconomic index (quintiles)
wealth_quintile	wealth quintile (socioeconomic position
age_part	participant age
parasitemia_rec	asymptomatic malaria status
